# Supplementary material for: tRNA-Derived Fragments as Biomarkers in Bladder Cancer
Source: MDPI journal article supplement (doi:10.3390/cancers16081588), 2024-04-20
Supplement: s1 [file Supplementary Table S1.xlsx]

## Sheet: summarized
file	short_definition	count	trfs	trfs_truncated
Serum_replicated	tRNA	18	tRF-30-87R95RM3Y826,tRF-29-KY7SHRRNWJE2,tRF-19-DRXSE5I2,tRF-18-F8DHXYD9,tRF-18-F8DHXYD9,tRF-18-F8DHXYD9,tRF-18-F8DHXYD9,tRF-18-F8DHXYD9,tRF-18-F8DHXYD9,tRF-18-F8DHXYD9,tRF-18-F8DHXYD9,tRF-18-F8DHXYD9,tRF-18-F8DHXYD9,tRF-18-F8DHXYD9,tRF-16-F1R3WEE,tRF-16-F1R3WEE,tRF-16-F1R3WEE,tRF-16-F1R3WEE	tRF-30-87R95RM3Y826,tRF-29-KY7SHRRNWJE2,tRF-19-DRXSE5I2,tRF-18-F8DHXYD9,tRF-18-F8DHXYD9,.....
Serum_replicated	other	12	tRF-29-W4R951KHZK1V,tRF-18-F8DHXYD9,tRF-16-F1R3WEE,tRF-16-F1R3WEE,tRF-16-F1R3WEE,tRF-16-F1R3WEE,tRF-16-F1R3WEE,tRF-16-F1R3WEE,tRF-16-F1R3WEE,tRF-16-F1R3WEE,tRF-16-F1R3WEE,tRF-16-F1R3WEE	tRF-29-W4R951KHZK1V,tRF-18-F8DHXYD9,tRF-16-F1R3WEE,tRF-16-F1R3WEE,tRF-16-F1R3WEE,tRF-16-.....
Serum_replicated	piRNA	8	tRF-30-87R95RM3Y826,tRF-29-KY7SHRRNWJE2,tRF-18-F8DHXYD9,tRF-18-F8DHXYD9,tRF-18-F8DHXYD9,tRF-18-F8DHXYD9,tRF-18-F8DHXYD9,tRF-18-F8DHXYD9	tRF-30-87R95RM3Y826,tRF-29-KY7SHRRNWJE2,tRF-18-F8DHXYD9,tRF-18-F8DHXYD9,tRF-18-F8DHXYD9,.....
Serum_replicated	lncRNA	5	tRF-29-W4R951KHZK1V,tRF-18-F8DHXYD9,tRF-18-F8DHXYD9,tRF-18-F8DHXYD9,tRF-16-F1R3WEE	tRF-29-W4R951KHZK1V,tRF-18-F8DHXYD9,tRF-18-F8DHXYD9,tRF-18-F8DHXYD9,tRF-16-F1R3WEE
Serum_replicated	CpG island	2	tRF-16-F1R3WEE,tRF-16-F1R3WEE	tRF-16-F1R3WEE,tRF-16-F1R3WEE
Serum_replicated	H3K4me1 hESC enhancer	2	tRF-29-W4R951KHZK1V,tRF-16-F1R3WEE	tRF-29-W4R951KHZK1V,tRF-16-F1R3WEE
Serum_replicated	LTA4	1	tRF-16-F1R3WEE	tRF-16-F1R3WEE
Serum_replicated	regulatory element	1	tRF-18-F8DHXYD9	tRF-18-F8DHXYD9
Urine EV replicated	tRNA	88	tRF-38-PNR8YP9LON4VN18,tRF-38-PNR8YP9LON4VN18,tRF-38-PNR8YP9LON4VN18,tRF-38-PNR8YP9LON4VN18,tRF-38-PNR8YP9LON4VN18,tRF-38-PNR8YP9LON4VN18,tRF-38-PNR8YP9LON4VN18,tRF-38-PNR8YP9LON4VN18,tRF-38-PNR8YP9LON4VN18,tRF-38-PNR8YP9LON4VN18,tRF-32-PER8YP9LON4V3,tRF-32-PER8YP9LON4V3,tRF-32-PER8YP9LON4V3,tRF-32-PER8YP9LON4V3,tRF-32-PER8YP9LON4V3,tRF-32-PER8YP9LON4V3,tRF-32-PER8YP9LON4V3,tRF-32-PER8YP9LON4V3,t…	tRF-38-PNR8YP9LON4VN18,tRF-38-PNR8YP9LON4VN18,tRF-38-PNR8YP9LON4VN18,tRF-38-PNR8YP9LON4V.....
Urine EV replicated	other	51	tRF-38-PNR8YP9LON4VN18,tRF-32-PER8YP9LON4V3,tRF-31-PER8YP9LON4VD,tRF-31-PER8YP9LON4VD,tRF-27-J87383RPD95,tRF-27-J87383RPD95,tRF-27-J87383RPD95,tRF-27-J87383RPD95,tRF-27-J87383RPD95,tRF-27-J87383RPD95,tRF-27-J87383RPD95,tRF-27-J87383RPD95,tRF-27-J87383RPD95,tRF-27-J87383RPD95,tRF-27-J87383RPD95,tRF-27-J87383RPD95,tRF-26-IK9NJ4S2I7D,tRF-26-IK9NJ4S2I7D,tRF-26-IK9NJ4S2I7D,tRF-26-IK9NJ4S2I7D,tRF-26-IK…	tRF-38-PNR8YP9LON4VN18,tRF-32-PER8YP9LON4V3,tRF-31-PER8YP9LON4VD,tRF-31-PER8YP9LON4VD,tR.....
Urine EV replicated	FCGR2A	30	tRF-38-PNR8YP9LON4VN18,tRF-38-PNR8YP9LON4VN18,tRF-38-PNR8YP9LON4VN18,tRF-38-PNR8YP9LON4VN18,tRF-38-PNR8YP9LON4VN18,tRF-32-PER8YP9LON4V3,tRF-32-PER8YP9LON4V3,tRF-32-PER8YP9LON4V3,tRF-32-PER8YP9LON4V3,tRF-32-PER8YP9LON4V3,tRF-31-PER8YP9LON4VD,tRF-31-PER8YP9LON4VD,tRF-31-PER8YP9LON4VD,tRF-31-PER8YP9LON4VD,tRF-31-PER8YP9LON4VD,tRF-27-J87383RPD95,tRF-27-J87383RPD95,tRF-27-J87383RPD95,tRF-27-J87383RPD9…	tRF-38-PNR8YP9LON4VN18,tRF-38-PNR8YP9LON4VN18,tRF-38-PNR8YP9LON4VN18,tRF-38-PNR8YP9LON4V.....
Urine EV replicated	H3K4me1 hESC enhancer	26	tRF-38-PNR8YP9LON4VN18,tRF-38-PNR8YP9LON4VN18,tRF-38-PNR8YP9LON4VN18,tRF-38-PNR8YP9LON4VN18,tRF-32-PER8YP9LON4V3,tRF-31-PER8YP9LON4VD,tRF-27-J87383RPD95,tRF-27-J87383RPD95,tRF-27-J87383RPD95,tRF-27-J87383RPD95,tRF-26-IK9NJ4S2I7D,tRF-26-IK9NJ4S2I7D,tRF-26-IK9NJ4S2I7D,tRF-26-IK9NJ4S2I7D,tRF-25-7P596VW631,tRF-25-7P596VW631,tRF-25-7P596VW631,tRF-20-40KK5Y93,tRF-17-I7XUK8N,tRF-17-D9W1X6K,tRF-17-D9W1X6…	tRF-38-PNR8YP9LON4VN18,tRF-38-PNR8YP9LON4VN18,tRF-38-PNR8YP9LON4VN18,tRF-38-PNR8YP9LON4V.....
Urine EV replicated	HES7	24	tRF-38-PNR8YP9LON4VN18,tRF-38-PNR8YP9LON4VN18,tRF-38-PNR8YP9LON4VN18,tRF-38-PNR8YP9LON4VN18,tRF-32-PER8YP9LON4V3,tRF-32-PER8YP9LON4V3,tRF-32-PER8YP9LON4V3,tRF-32-PER8YP9LON4V3,tRF-31-PER8YP9LON4VD,tRF-31-PER8YP9LON4VD,tRF-31-PER8YP9LON4VD,tRF-31-PER8YP9LON4VD,tRF-27-J87383RPD95,tRF-27-J87383RPD95,tRF-27-J87383RPD95,tRF-27-J87383RPD95,tRF-26-IK9NJ4S2I7D,tRF-26-IK9NJ4S2I7D,tRF-26-IK9NJ4S2I7D,tRF-26…	tRF-38-PNR8YP9LON4VN18,tRF-38-PNR8YP9LON4VN18,tRF-38-PNR8YP9LON4VN18,tRF-38-PNR8YP9LON4V.....
Urine EV replicated	piRNA	17	tRF-27-J87383RPD95,tRF-27-J87383RPD95,tRF-27-J87383RPD95,tRF-27-J87383RPD95,tRF-26-IK9NJ4S2I7D,tRF-26-IK9NJ4S2I7D,tRF-26-IK9NJ4S2I7D,tRF-26-IK9NJ4S2I7D,tRF-26-IK9NJ4S2I7D,tRF-26-IK9NJ4S2I7D,tRF-18-MBQ4NKDJ,tRF-18-MBQ4NKDJ,tRF-18-MBQ4NKDJ,tRF-18-MBQ4NKDJ,tRF-18-MBQ4NKDJ,tRF-18-MBQ4NKDJ,tRF-18-MBQ4NKDJ	tRF-27-J87383RPD95,tRF-27-J87383RPD95,tRF-27-J87383RPD95,tRF-27-J87383RPD95,tRF-26-IK9NJ.....
Urine EV replicated	lncRNA	14	tRF-27-J87383RPD95,tRF-26-IK9NJ4S2I7D,tRF-26-IK9NJ4S2I7D,tRF-25-7P596VW631,tRF-25-7P596VW631,tRF-25-7P596VW631,tRF-25-7P596VW631,tRF-21-86J8WPMNB,tRF-18-MBQ4NKDJ,tRF-18-MBQ4NKDJ,tRF-18-MBQ4NKDJ,tRF-17-D9W1X6K,tRF-17-D9W1X6K,tRF-16-F1R3WEE	tRF-27-J87383RPD95,tRF-26-IK9NJ4S2I7D,tRF-26-IK9NJ4S2I7D,tRF-25-7P596VW631,tRF-25-7P596V.....
Urine EV replicated	regulatory element	7	tRF-38-PNR8YP9LON4VN18,tRF-32-PER8YP9LON4V3,tRF-31-PER8YP9LON4VD,tRF-27-J87383RPD95,tRF-26-IK9NJ4S2I7D,tRF-18-MBQ4NKDJ,tRF-17-D9W1X6K	tRF-38-PNR8YP9LON4VN18,tRF-32-PER8YP9LON4V3,tRF-31-PER8YP9LON4VD,tRF-27-J87383RPD95,tRF-.....
Urine EV replicated	CpG island	6	tRF-32-PER8YP9LON4V3,tRF-31-PER8YP9LON4VD,tRF-25-7P596VW631,tRF-21-86J8WPMNB,tRF-16-F1R3WEE,tRF-16-F1R3WEE	tRF-32-PER8YP9LON4V3,tRF-31-PER8YP9LON4VD,tRF-25-7P596VW631,tRF-21-86J8WPMNB,tRF-16-F1R3.....
Urine EV replicated	GPD2	6	tRF-38-PNR8YP9LON4VN18,tRF-32-PER8YP9LON4V3,tRF-31-PER8YP9LON4VD,tRF-27-J87383RPD95,tRF-26-IK9NJ4S2I7D,tRF-17-D9W1X6K	tRF-38-PNR8YP9LON4VN18,tRF-32-PER8YP9LON4V3,tRF-31-PER8YP9LON4VD,tRF-27-J87383RPD95,tRF-.....
Urine EV replicated	HSPA6	6	tRF-38-PNR8YP9LON4VN18,tRF-32-PER8YP9LON4V3,tRF-31-PER8YP9LON4VD,tRF-27-J87383RPD95,tRF-26-IK9NJ4S2I7D,tRF-17-D9W1X6K	tRF-38-PNR8YP9LON4VN18,tRF-32-PER8YP9LON4V3,tRF-31-PER8YP9LON4VD,tRF-27-J87383RPD95,tRF-.....
Urine EV replicated	VAC14	6	tRF-38-PNR8YP9LON4VN18,tRF-32-PER8YP9LON4V3,tRF-31-PER8YP9LON4VD,tRF-27-J87383RPD95,tRF-26-IK9NJ4S2I7D,tRF-17-D9W1X6K	tRF-38-PNR8YP9LON4VN18,tRF-32-PER8YP9LON4V3,tRF-31-PER8YP9LON4VD,tRF-27-J87383RPD95,tRF-.....
Urine EV replicated	LTA4	1	tRF-16-F1R3WEE	tRF-16-F1R3WEE

## Sheet: filtered
file	query_def	query_len	hit_accession	hit_def	hit_len	n_hsp	max_score	hsp_identity
Serum_replicated	tRF-30-87R95RM3Y826	30	K00350	Bombyx mori major Phe-tRNA >gi|173964|gb|K00353.1|BOVTRF2 Bovine Phe-tRNA-2 >gi|174920|gb|K00350.1|HUMTRF Human Phe-tRNA >gi|175414|gb|K02684.1|MUSTRF Mouse Phe-tRNA >gi|175415|gb|K02685.1|MUSTRFTA Mouse Erlich ascites tumor-specific Phe-tRNA >gi|175416|gb|K02686.1|MUSTRFTB Mouse neuroblastoma tumor-specific Phe-tRNA >gi|175759|gb|K00351.1|RABTRF Rabbit Phe-tRNA >gi|176346|gb|K02849.1|XELTRF X.le…	76	1	30	30
Serum_replicated	tRF-30-87R95RM3Y826	30	DQ575661	Homo sapiens piRNA piR-43773, complete sequence	29	1	29	29
Serum_replicated	tRF-29-W4R951KHZK1V	29	MW803856	Homo sapiens LHRI_LNC2361.1 lncRNA, complete sequence	609	1	28	28
Serum_replicated	tRF-29-W4R951KHZK1V	29	NG_092047	Homo sapiens NANOG-H3K27ac-H3K4me1 hESC enhancer GRCh37_chr1:145395462-145396128 (LOC127270192) on chromosome 1	867	1	28	28
Serum_replicated	tRF-29-W4R951KHZK1V	29	AL132989	Human chromosome 14 DNA sequence BAC C-2002H8 of library CalTech-D from chromosome 14 of Homo sapiens (Human), complete sequence	146740	1	28	28
Serum_replicated	tRF-29-KY7SHRRNWJE2	29	K00350	Bombyx mori major Phe-tRNA >gi|173964|gb|K00353.1|BOVTRF2 Bovine Phe-tRNA-2 >gi|174920|gb|K00350.1|HUMTRF Human Phe-tRNA >gi|175414|gb|K02684.1|MUSTRF Mouse Phe-tRNA >gi|175415|gb|K02685.1|MUSTRFTA Mouse Erlich ascites tumor-specific Phe-tRNA >gi|175416|gb|K02686.1|MUSTRFTB Mouse neuroblastoma tumor-specific Phe-tRNA >gi|175759|gb|K00351.1|RABTRF Rabbit Phe-tRNA >gi|176346|gb|K02849.1|XELTRF X.le…	76	1	29	29
Serum_replicated	tRF-29-KY7SHRRNWJE2	29	DQ575661	Homo sapiens piRNA piR-43773, complete sequence	29	1	28	28
Serum_replicated	tRF-19-DRXSE5I2	19	6Z6M_CC	Chain CC, tRNA	85	1	19	19
Serum_replicated	tRF-18-F8DHXYD9	18	6ZP4_1	Chain 1, tRNA >gi|1938876689|pdb|7A09|f Chain f, tRNA	75	1	18	18
Serum_replicated	tRF-18-F8DHXYD9	18	4KZZ_j	Chain j, initiator Met-RNA-i >gi|2231579900|pdb|7TQL|3 Chain 3, Human Met-tRNAiMet	75	1	18	18
Serum_replicated	tRF-18-F8DHXYD9	18	Z69292	H.sapiens tRNA-Met gene	825	1	18	18
Serum_replicated	tRF-18-F8DHXYD9	18	NG_066782	Homo sapiens CRISPRi-validated cis-regulatory element chr6.1315 (LOC116183052) on chromosome 6	1273	1	18	18
Serum_replicated	tRF-18-F8DHXYD9	18	MW804146	Homo sapiens LHRI_LNC2170.1 lncRNA, complete sequence	508	1	18	18
Serum_replicated	tRF-18-F8DHXYD9	18	MW803861	Homo sapiens LHRI_LNC2366.1 lncRNA, complete sequence	203	1	18	18
Serum_replicated	tRF-18-F8DHXYD9	18	MN296879	Homo sapiens LHRI_LNC718.1 lncRNA gene, complete sequence	240	1	18	18
Serum_replicated	tRF-18-F8DHXYD9	18	DQ570849	Homo sapiens piRNA piR-30961, complete sequence	31	1	18	18
Serum_replicated	tRF-18-F8DHXYD9	18	DQ582262	Homo sapiens piRNA piR-32374, complete sequence	31	1	18	18
Serum_replicated	tRF-18-F8DHXYD9	18	DQ593275	Homo sapiens piRNA piR-33387, complete sequence	32	1	18	18
Serum_replicated	tRF-18-F8DHXYD9	18	DQ597110	Homo sapiens piRNA piR-35176, complete sequence	32	1	18	18
Serum_replicated	tRF-18-F8DHXYD9	18	DQ597163	Homo sapiens piRNA piR-35229, complete sequence	29	1	18	18
Serum_replicated	tRF-18-F8DHXYD9	18	DQ597886	Homo sapiens piRNA piR-35952, complete sequence	32	1	18	18
Serum_replicated	tRF-18-F8DHXYD9	18	NG_077957	Homo sapiens Sharpr-MPRA regulatory region 6095 (LOC123620075) on chromosome 6	495	1	18	18
Serum_replicated	tRF-18-F8DHXYD9	18	K00328	Human initiator Met-tRNA-i >gi|175421|gb|K00329.1|MUSTRMI Mouse initiator Met-tRNA-i >gi|175569|gb|K00327.1|ONHTRMI Salmon initiator Met-tRNA-i >gi|176348|gb|K00330.1|XELTRMI X.laevis initiator Met-tRNA-i >gi|1048348538|pdb|5K0Y|N Chain N, tRNA >gi|1890516849|pdb|6FEC|N Chain N, Transfer RNA (75-MER) >gi|1938947666|pdb|6YBV|w Chain w, Initiator methionine tRNA >gi|1938954186|pdb|6ZMW|w Chain w, I…	75	1	18	18
Serum_replicated	tRF-18-F8DHXYD9	18	M10957	Human initiator Met-tRNA mutant T54	141	1	18	18
Serum_replicated	tRF-18-F8DHXYD9	18	J00310	Human Met-tRNA-i gene 1	270	1	18	18
Serum_replicated	tRF-18-F8DHXYD9	18	J00311	Human met-tRNA-i gene 2 (clone lambda-htm2)	270	1	18	18
Serum_replicated	tRF-18-F8DHXYD9	18	HG984136	TPA: Homo sapiens tRNA-iMet-CAT-1-1 gene >gi|634722582|tpe|HG984137.1| TPA: Homo sapiens tRNA-iMet-CAT-1-8 gene >gi|634722583|tpe|HG984138.1| TPA: Homo sapiens tRNA-iMet-CAT-1-2 gene >gi|634722585|tpe|HG984139.1| TPA: Homo sapiens tRNA-iMet-CAT-1-3 gene >gi|634722586|tpe|HG984140.1| TPA: Homo sapiens tRNA-iMet-CAT-1-4 gene >gi|634722588|tpe|HG984141.1| TPA: Homo sapiens tRNA-iMet-CAT-1-5 gene >gi…	72	1	18	18
Serum_replicated	tRF-18-F8DHXYD9	18	HG984144	TPA: Homo sapiens tRNA-iMet-CAT-2-1 gene	72	1	18	18
Serum_replicated	tRF-18-F8DHXYD9	18	HG984057	TPA: Homo sapiens tRNA-Thr-CGT-6-1 gene	72	1	18	18
Serum_replicated	tRF-18-F8DHXYD9	18	3J3D_C	Chain C, E-tRNA	75	1	15	17
Serum_replicated	tRF-16-F1R3WEE	16	Z60777	H.sapiens CpG island DNA genomic Mse1 fragment, clone 34b11, forward read cpg34b11.ft1a	285	1	16	16
Serum_replicated	tRF-16-F1R3WEE	16	Z58783	H.sapiens CpG island DNA genomic Mse1 fragment, clone 50a4, forward read cpg50a4.ft1a	197	1	16	16
Serum_replicated	tRF-16-F1R3WEE	16	AC093719	Homo sapiens 12 BAC RP11-549I9 (Roswell Park Cancer Institute Human BAC Library) complete sequence	79925	1	16	16
Serum_replicated	tRF-16-F1R3WEE	16	AC126309	Homo sapiens 12 BAC RP11-592O2 (Roswell Park Cancer Institute Human BAC Library) complete sequence	121984	1	16	16
Serum_replicated	tRF-16-F1R3WEE	16	AC007298	Homo sapiens 12q22 BAC RPCI11-256L6 (Roswell Park Cancer Institute Human BAC Library) complete sequence	201572	1	16	16
Serum_replicated	tRF-16-F1R3WEE	16	AK000590	Homo sapiens cDNA FLJ20583 fis, clone KAT09685 >gi|62897804|dbj|AK223122.1| Homo sapiens mRNA for Cohen syndrome 1 protein isoform 4 variant, clone: KAT09685	1673	1	16	16
Serum_replicated	tRF-16-F1R3WEE	16	AK294137	Homo sapiens cDNA FLJ57265 complete cds, highly similar to Neurotrimin precursor	1427	1	16	16
Serum_replicated	tRF-16-F1R3WEE	16	NG_092516	Homo sapiens H3K27ac-H3K4me1 hESC enhancer GRCh37_chr1:161417401-161418284 (LOC127270664) on chromosome 1	1084	1	16	16
Serum_replicated	tRF-16-F1R3WEE	16	U65080	Homo sapiens leukotriene A4 hydrolase (LTA4) gene, promoter region and partial cds	2242	1	16	16
Serum_replicated	tRF-16-F1R3WEE	16	MW804024	Homo sapiens LHRI_LNC2547.1 lncRNA, complete sequence	421	1	16	16
Serum_replicated	tRF-16-F1R3WEE	16	AB330779	Homo sapiens RNA, tRNaseZL-interacting RNA A11	31	1	16	16
Serum_replicated	tRF-16-F1R3WEE	16	AB330774	Homo sapiens RNA, tRNaseZL-interacting RNA A6	39	1	16	16
Serum_replicated	tRF-16-F1R3WEE	16	AF037471	Homo sapiens tRNA-Asp gene, complete sequence	410	1	16	16
Serum_replicated	tRF-16-F1R3WEE	16	XR_007076674	PREDICTED: Homo sapiens uncharacterized LOC105375001 (LOC105375001), transcript variant X2, ncRNA	5888	1	16	16
Serum_replicated	tRF-16-F1R3WEE	16	HG983665	TPA: Homo sapiens tRNA-Asp-GTC-2-1 gene >gi|634721645|tpe|HG983666.1| TPA: Homo sapiens tRNA-Asp-GTC-2-2 gene >gi|634721648|tpe|HG983667.1| TPA: Homo sapiens tRNA-Asp-GTC-2-3 gene >gi|634721650|tpe|HG983668.1| TPA: Homo sapiens tRNA-Asp-GTC-2-4 gene >gi|634721653|tpe|HG983669.1| TPA: Homo sapiens tRNA-Asp-GTC-2-5 gene >gi|634721655|tpe|HG983670.1| TPA: Homo sapiens tRNA-Asp-GTC-2-8 gene >gi|63472…	72	1	16	16
Serum_replicated	tRF-16-F1R3WEE	16	HG983676	TPA: Homo sapiens tRNA-Asp-GTC-3-1 gene	72	1	16	16
Serum_replicated	tRF-16-F1R3WEE	16	HG983677	TPA: Homo sapiens tRNA-Asp-GTC-4-1 gene	72	1	16	16
Serum_replicated	tRF-16-F1R3WEE	16	AJ331685	Homo sapiens genomic sequence surrounding NotI site, clone NR5-GI6C	764	1	15	15
Serum_replicated	tRF-16-F1R3WEE	16	NG_047176	Homo sapiens exocyst complex component 4 (EXOC4), RefSeqGene on chromosome 7	854874	1	12	15
Urine EV replicated	tRF-38-PNR8YP9LON4VN18	38	Z26636	H.sapiens gene for tRNA-Gly >gi|51870476|emb|X53366.1| H.sapiens tRNA-Gly gene	713	1	76	38
Urine EV replicated	tRF-38-PNR8YP9LON4VN18	38	NG_066782	Homo sapiens CRISPRi-validated cis-regulatory element chr6.1315 (LOC116183052) on chromosome 6	1273	1	76	38
Urine EV replicated	tRF-38-PNR8YP9LON4VN18	38	NG_012066	Homo sapiens Fc gamma receptor IIa (FCGR2A), RefSeqGene (LRG_1109) on chromosome 1	25599	1	76	38
Urine EV replicated	tRF-38-PNR8YP9LON4VN18	38	NG_016606	Homo sapiens glycerol-3-phosphate dehydrogenase 2 (GPD2), RefSeqGene on chromosome 2; nuclear gene for mitochondrial product	193123	1	76	38
Urine EV replicated	tRF-38-PNR8YP9LON4VN18	38	NG_135431	Homo sapiens H3K4me1 hESC enhancer GRCh37_chr17:8029079-8029880 (LOC127885694) on chromosome 17	1002	1	76	38
Urine EV replicated	tRF-38-PNR8YP9LON4VN18	38	DQ521571	Homo sapiens heat shock 70kDa protein 6 (HSP70B') (HSPA6) gene, complete cds	6467	1	76	38
Urine EV replicated	tRF-38-PNR8YP9LON4VN18	38	NG_015816	Homo sapiens hes family bHLH transcription factor 7 (HES7), RefSeqGene on chromosome 17	10503	1	76	38
Urine EV replicated	tRF-38-PNR8YP9LON4VN18	38	NG_054902	Homo sapiens VAC14 component of PIKFYVE complex (VAC14), RefSeqGene on chromosome 16	120731	3	76	38,38,38
Urine EV replicated	tRF-38-PNR8YP9LON4VN18	38	K00208	Human Gly-tRNA-GCC >gi|175269|gb|M21527.1|MLMTRGA Moloney murine leukemia virus Gly-tRNA	74	1	76	38
Urine EV replicated	tRF-38-PNR8YP9LON4VN18	38	M13661	Human Gly-tRNA-GCC gene and pseudogene, complete cds	1362	2	76	38,38
Urine EV replicated	tRF-38-PNR8YP9LON4VN18	38	M20924	Human Gly-tRNA gene, clone lambda-Ht8	397	2	76	38,38
Urine EV replicated	tRF-38-PNR8YP9LON4VN18	38	M20923	Human Gly-tRNA gene, clone lambda-Ht8	947	2	76	38,38
Urine EV replicated	tRF-38-PNR8YP9LON4VN18	38	XM_054335134	PREDICTED: Homo sapiens Fc gamma receptor IIa (FCGR2A), transcript variant X3, mRNA	1713	2	76	38,38
Urine EV replicated	tRF-38-PNR8YP9LON4VN18	38	XM_017000664	PREDICTED: Homo sapiens Fc gamma receptor IIa (FCGR2A), transcript variant X3, mRNA	1713	2	76	38,38
Urine EV replicated	tRF-38-PNR8YP9LON4VN18	38	XM_054335135	PREDICTED: Homo sapiens Fc gamma receptor IIa (FCGR2A), transcript variant X4, mRNA	1516	2	76	38,38
Urine EV replicated	tRF-38-PNR8YP9LON4VN18	38	XM_017000665	PREDICTED: Homo sapiens Fc gamma receptor IIa (FCGR2A), transcript variant X4, mRNA	1516	2	76	38,38
Urine EV replicated	tRF-38-PNR8YP9LON4VN18	38	XM_054317564	PREDICTED: Homo sapiens hes family bHLH transcription factor 7 (HES7), transcript variant X2, mRNA	2811	2	76	38,38
Urine EV replicated	tRF-38-PNR8YP9LON4VN18	38	XM_047436941	PREDICTED: Homo sapiens hes family bHLH transcription factor 7 (HES7), transcript variant X2, mRNA	2820	2	76	38,38
Urine EV replicated	tRF-38-PNR8YP9LON4VN18	38	XM_054317563	PREDICTED: Homo sapiens hes family bHLH transcription factor 7 (HES7), transcript variant X4, mRNA	3274	1	76	38
Urine EV replicated	tRF-38-PNR8YP9LON4VN18	38	HG983811	TPA: Homo sapiens tRNA-Gly-GCC-2-1 gene >gi|634721943|tpe|HG983812.1| TPA: Homo sapiens tRNA-Gly-GCC-2-4 gene >gi|634721946|tpe|HG983813.1| TPA: Homo sapiens tRNA-Gly-GCC-2-5 gene >gi|634721947|tpe|HG983814.1| TPA: Homo sapiens tRNA-Gly-GCC-2-6 gene >gi|634721949|tpe|HG983815.1| TPA: Homo sapiens tRNA-Gly-GCC-2-2 gene >gi|634721951|tpe|HG983816.1| TPA: Homo sapiens tRNA-Gly-GCC-2-3 gene >gi|63472…	71	1	76	38
Urine EV replicated	tRF-38-PNR8YP9LON4VN18	38	HG983817	TPA: Homo sapiens tRNA-Gly-GCC-3-1 gene	71	1	76	38
Urine EV replicated	tRF-38-PNR8YP9LON4VN18	38	AP000952	Homo sapiens genomic DNA, chromosome 21q21.1-q21.2 clone:B651M22, LL56-APP region, complete sequence	109374	1	71	37
Urine EV replicated	tRF-38-PNR8YP9LON4VN18	38	NG_092518	Homo sapiens H3K27ac-H3K4me1 hESC enhancer GRCh37_chr1:161420051-161420932 (LOC127270666) on chromosome 1	1082	1	71	37
Urine EV replicated	tRF-38-PNR8YP9LON4VN18	38	NG_092523	Homo sapiens H3K27ac-H3K4me1 hESC enhancer GRCh37_chr1:161427797-161428409 (LOC127270671) on chromosome 1	813	1	71	37
Urine EV replicated	tRF-38-PNR8YP9LON4VN18	38	NG_092513	Homo sapiens OCT4-H3K27ac-H3K4me1 hESC enhancer GRCh37_chr1:161413009-161413866 (LOC127270661) on chromosome 1	1058	1	71	37
Urine EV replicated	tRF-38-PNR8YP9LON4VN18	38	M11273	Human Gly-tRNA gene	536	1	71	37
Urine EV replicated	tRF-38-PNR8YP9LON4VN18	38	HG983796	TPA: Homo sapiens tRNA-Gly-CCC-1-1 gene >gi|634721916|tpe|HG983797.1| TPA: Homo sapiens tRNA-Gly-CCC-1-2 gene	71	1	71	37
Urine EV replicated	tRF-38-PNR8YP9LON4VN18	38	HG983806	TPA: Homo sapiens tRNA-Gly-GCC-1-1 gene >gi|634721934|tpe|HG983807.1| TPA: Homo sapiens tRNA-Gly-GCC-1-2 gene >gi|634721936|tpe|HG983808.1| TPA: Homo sapiens tRNA-Gly-GCC-1-3 gene >gi|634721937|tpe|HG983809.1| TPA: Homo sapiens tRNA-Gly-GCC-1-4 gene >gi|634721940|tpe|HG983810.1| TPA: Homo sapiens tRNA-Gly-GCC-1-5 gene >gi|634722980|tpe|HG984369.1| TPA: Mus musculus tRNA-Gly-GCC-1-1 gene >gi|63472…	71	1	71	37
Urine EV replicated	tRF-32-PER8YP9LON4V3	32	NG_008576	Homo sapiens tRNA-Glu (anticodon TTC) 9-1 (TRE-TTC9-1) pseudogene on chromosome 2	271	1	64	32
Urine EV replicated	tRF-32-PER8YP9LON4V3	32	HG983788	TPA: Homo sapiens tRNA-Glu-TTC-9-1 gene	71	1	64	32
Urine EV replicated	tRF-32-PER8YP9LON4V3	32	Z26636	H.sapiens gene for tRNA-Gly >gi|51870476|emb|X53366.1| H.sapiens tRNA-Gly gene	713	1	59	31
Urine EV replicated	tRF-32-PER8YP9LON4V3	32	NG_009032	Homo sapiens collagen like tail subunit of asymmetric acetylcholinesterase (COLQ), RefSeqGene on chromosome 3	78619	1	59	31
Urine EV replicated	tRF-32-PER8YP9LON4V3	32	NG_066782	Homo sapiens CRISPRi-validated cis-regulatory element chr6.1315 (LOC116183052) on chromosome 6	1273	1	59	31
Urine EV replicated	tRF-32-PER8YP9LON4V3	32	NG_012066	Homo sapiens Fc gamma receptor IIa (FCGR2A), RefSeqGene (LRG_1109) on chromosome 1	25599	1	59	31
Urine EV replicated	tRF-32-PER8YP9LON4V3	32	NG_016606	Homo sapiens glycerol-3-phosphate dehydrogenase 2 (GPD2), RefSeqGene on chromosome 2; nuclear gene for mitochondrial product	193123	1	59	31
Urine EV replicated	tRF-32-PER8YP9LON4V3	32	NG_135431	Homo sapiens H3K4me1 hESC enhancer GRCh37_chr17:8029079-8029880 (LOC127885694) on chromosome 17	1002	1	59	31
Urine EV replicated	tRF-32-PER8YP9LON4V3	32	DQ521571	Homo sapiens heat shock 70kDa protein 6 (HSP70B') (HSPA6) gene, complete cds	6467	1	59	31
Urine EV replicated	tRF-32-PER8YP9LON4V3	32	NG_015816	Homo sapiens hes family bHLH transcription factor 7 (HES7), RefSeqGene on chromosome 17	10503	1	59	31
Urine EV replicated	tRF-32-PER8YP9LON4V3	32	NG_054902	Homo sapiens VAC14 component of PIKFYVE complex (VAC14), RefSeqGene on chromosome 16	120731	4	59	31,31,31,31
Urine EV replicated	tRF-32-PER8YP9LON4V3	32	AL358813	Human DNA sequence from clone RP11-353N4 on chromosome 1 Contains the 3' end of a novel gene, a novel gene, a novel pseudogene, a NHP2 non-histone chromosome protein 2-like 1 (S. cerevisiae) (NHP2L1) pseudogene, two novel genes and two CpG islands, complete sequence	125166	1	59	31
Urine EV replicated	tRF-32-PER8YP9LON4V3	32	K00208	Human Gly-tRNA-GCC >gi|175269|gb|M21527.1|MLMTRGA Moloney murine leukemia virus Gly-tRNA	74	1	59	31
Urine EV replicated	tRF-32-PER8YP9LON4V3	32	M13661	Human Gly-tRNA-GCC gene and pseudogene, complete cds	1362	2	59	31,31
Urine EV replicated	tRF-32-PER8YP9LON4V3	32	M11273	Human Gly-tRNA gene	536	1	59	31
Urine EV replicated	tRF-32-PER8YP9LON4V3	32	M20924	Human Gly-tRNA gene, clone lambda-Ht8	397	2	59	31,31
Urine EV replicated	tRF-32-PER8YP9LON4V3	32	M20923	Human Gly-tRNA gene, clone lambda-Ht8	947	2	59	31,31
Urine EV replicated	tRF-32-PER8YP9LON4V3	32	XM_054335134	PREDICTED: Homo sapiens Fc gamma receptor IIa (FCGR2A), transcript variant X3, mRNA	1713	2	59	31,31
Urine EV replicated	tRF-32-PER8YP9LON4V3	32	XM_017000664	PREDICTED: Homo sapiens Fc gamma receptor IIa (FCGR2A), transcript variant X3, mRNA	1713	2	59	31,31
Urine EV replicated	tRF-32-PER8YP9LON4V3	32	XM_054335135	PREDICTED: Homo sapiens Fc gamma receptor IIa (FCGR2A), transcript variant X4, mRNA	1516	2	59	31,31
Urine EV replicated	tRF-32-PER8YP9LON4V3	32	XM_017000665	PREDICTED: Homo sapiens Fc gamma receptor IIa (FCGR2A), transcript variant X4, mRNA	1516	2	59	31,31
Urine EV replicated	tRF-32-PER8YP9LON4V3	32	XM_054317564	PREDICTED: Homo sapiens hes family bHLH transcription factor 7 (HES7), transcript variant X2, mRNA	2811	2	59	31,31
Urine EV replicated	tRF-32-PER8YP9LON4V3	32	XM_047436941	PREDICTED: Homo sapiens hes family bHLH transcription factor 7 (HES7), transcript variant X2, mRNA	2820	2	59	31,31
Urine EV replicated	tRF-32-PER8YP9LON4V3	32	XM_054317563	PREDICTED: Homo sapiens hes family bHLH transcription factor 7 (HES7), transcript variant X4, mRNA	3274	1	59	31
Urine EV replicated	tRF-32-PER8YP9LON4V3	32	HG983796	TPA: Homo sapiens tRNA-Gly-CCC-1-1 gene >gi|634721916|tpe|HG983797.1| TPA: Homo sapiens tRNA-Gly-CCC-1-2 gene	71	1	59	31
Urine EV replicated	tRF-32-PER8YP9LON4V3	32	HG983803	TPA: Homo sapiens tRNA-Gly-CCC-6-1 gene	71	1	59	31
Urine EV replicated	tRF-32-PER8YP9LON4V3	32	HG983811	TPA: Homo sapiens tRNA-Gly-GCC-2-1 gene >gi|634721943|tpe|HG983812.1| TPA: Homo sapiens tRNA-Gly-GCC-2-4 gene >gi|634721946|tpe|HG983813.1| TPA: Homo sapiens tRNA-Gly-GCC-2-5 gene >gi|634721947|tpe|HG983814.1| TPA: Homo sapiens tRNA-Gly-GCC-2-6 gene >gi|634721949|tpe|HG983815.1| TPA: Homo sapiens tRNA-Gly-GCC-2-2 gene >gi|634721951|tpe|HG983816.1| TPA: Homo sapiens tRNA-Gly-GCC-2-3 gene >gi|63472…	71	1	59	31
Urine EV replicated	tRF-32-PER8YP9LON4V3	32	HG983817	TPA: Homo sapiens tRNA-Gly-GCC-3-1 gene	71	1	59	31
Urine EV replicated	tRF-32-PER8YP9LON4V3	32	HG983819	TPA: Homo sapiens tRNA-Gly-GCC-5-1 gene	71	1	59	31
Urine EV replicated	tRF-32-PER8YP9LON4V3	32	HG984123	TPA: Homo sapiens tRNA-Val-CAC-8-1 gene	71	1	59	31
Urine EV replicated	tRF-31-PER8YP9LON4VD	31	NG_008576	Homo sapiens tRNA-Glu (anticodon TTC) 9-1 (TRE-TTC9-1) pseudogene on chromosome 2	271	1	62	31
Urine EV replicated	tRF-31-PER8YP9LON4VD	31	HG983788	TPA: Homo sapiens tRNA-Glu-TTC-9-1 gene	71	1	62	31
Urine EV replicated	tRF-31-PER8YP9LON4VD	31	Z26636	H.sapiens gene for tRNA-Gly >gi|51870476|emb|X53366.1| H.sapiens tRNA-Gly gene	713	1	57	30
Urine EV replicated	tRF-31-PER8YP9LON4VD	31	NG_009032	Homo sapiens collagen like tail subunit of asymmetric acetylcholinesterase (COLQ), RefSeqGene on chromosome 3	78619	1	57	30
Urine EV replicated	tRF-31-PER8YP9LON4VD	31	NG_066782	Homo sapiens CRISPRi-validated cis-regulatory element chr6.1315 (LOC116183052) on chromosome 6	1273	1	57	30
Urine EV replicated	tRF-31-PER8YP9LON4VD	31	NG_012066	Homo sapiens Fc gamma receptor IIa (FCGR2A), RefSeqGene (LRG_1109) on chromosome 1	25599	1	57	30
Urine EV replicated	tRF-31-PER8YP9LON4VD	31	NG_016606	Homo sapiens glycerol-3-phosphate dehydrogenase 2 (GPD2), RefSeqGene on chromosome 2; nuclear gene for mitochondrial product	193123	1	57	30
Urine EV replicated	tRF-31-PER8YP9LON4VD	31	NG_135431	Homo sapiens H3K4me1 hESC enhancer GRCh37_chr17:8029079-8029880 (LOC127885694) on chromosome 17	1002	1	57	30
Urine EV replicated	tRF-31-PER8YP9LON4VD	31	DQ521571	Homo sapiens heat shock 70kDa protein 6 (HSP70B') (HSPA6) gene, complete cds	6467	1	57	30
Urine EV replicated	tRF-31-PER8YP9LON4VD	31	NG_015816	Homo sapiens hes family bHLH transcription factor 7 (HES7), RefSeqGene on chromosome 17	10503	1	57	30
Urine EV replicated	tRF-31-PER8YP9LON4VD	31	LC700394	Homo sapiens S8_B_EXO miRNA region, complete sequence	150	1	57	30
Urine EV replicated	tRF-31-PER8YP9LON4VD	31	NG_054902	Homo sapiens VAC14 component of PIKFYVE complex (VAC14), RefSeqGene on chromosome 16	120731	4	57	30,30,30,30
Urine EV replicated	tRF-31-PER8YP9LON4VD	31	AL358813	Human DNA sequence from clone RP11-353N4 on chromosome 1 Contains the 3' end of a novel gene, a novel gene, a novel pseudogene, a NHP2 non-histone chromosome protein 2-like 1 (S. cerevisiae) (NHP2L1) pseudogene, two novel genes and two CpG islands, complete sequence	125166	1	57	30
Urine EV replicated	tRF-31-PER8YP9LON4VD	31	K00208	Human Gly-tRNA-GCC >gi|175269|gb|M21527.1|MLMTRGA Moloney murine leukemia virus Gly-tRNA	74	1	57	30
Urine EV replicated	tRF-31-PER8YP9LON4VD	31	M13661	Human Gly-tRNA-GCC gene and pseudogene, complete cds	1362	2	57	30,30
Urine EV replicated	tRF-31-PER8YP9LON4VD	31	M11273	Human Gly-tRNA gene	536	1	57	30
Urine EV replicated	tRF-31-PER8YP9LON4VD	31	M20924	Human Gly-tRNA gene, clone lambda-Ht8	397	2	57	30,30
Urine EV replicated	tRF-31-PER8YP9LON4VD	31	M20923	Human Gly-tRNA gene, clone lambda-Ht8	947	2	57	30,30
Urine EV replicated	tRF-31-PER8YP9LON4VD	31	XM_054335134	PREDICTED: Homo sapiens Fc gamma receptor IIa (FCGR2A), transcript variant X3, mRNA	1713	2	57	30,30
Urine EV replicated	tRF-31-PER8YP9LON4VD	31	XM_017000664	PREDICTED: Homo sapiens Fc gamma receptor IIa (FCGR2A), transcript variant X3, mRNA	1713	2	57	30,30
Urine EV replicated	tRF-31-PER8YP9LON4VD	31	XM_054335135	PREDICTED: Homo sapiens Fc gamma receptor IIa (FCGR2A), transcript variant X4, mRNA	1516	2	57	30,30
Urine EV replicated	tRF-31-PER8YP9LON4VD	31	XM_017000665	PREDICTED: Homo sapiens Fc gamma receptor IIa (FCGR2A), transcript variant X4, mRNA	1516	2	57	30,30
Urine EV replicated	tRF-31-PER8YP9LON4VD	31	XM_054317564	PREDICTED: Homo sapiens hes family bHLH transcription factor 7 (HES7), transcript variant X2, mRNA	2811	2	57	30,30
Urine EV replicated	tRF-31-PER8YP9LON4VD	31	XM_047436941	PREDICTED: Homo sapiens hes family bHLH transcription factor 7 (HES7), transcript variant X2, mRNA	2820	2	57	30,30
Urine EV replicated	tRF-31-PER8YP9LON4VD	31	XM_054317563	PREDICTED: Homo sapiens hes family bHLH transcription factor 7 (HES7), transcript variant X4, mRNA	3274	1	57	30
Urine EV replicated	tRF-31-PER8YP9LON4VD	31	HG983796	TPA: Homo sapiens tRNA-Gly-CCC-1-1 gene >gi|634721916|tpe|HG983797.1| TPA: Homo sapiens tRNA-Gly-CCC-1-2 gene	71	1	57	30
Urine EV replicated	tRF-31-PER8YP9LON4VD	31	HG983803	TPA: Homo sapiens tRNA-Gly-CCC-6-1 gene	71	1	57	30
Urine EV replicated	tRF-31-PER8YP9LON4VD	31	HG983811	TPA: Homo sapiens tRNA-Gly-GCC-2-1 gene >gi|634721943|tpe|HG983812.1| TPA: Homo sapiens tRNA-Gly-GCC-2-4 gene >gi|634721946|tpe|HG983813.1| TPA: Homo sapiens tRNA-Gly-GCC-2-5 gene >gi|634721947|tpe|HG983814.1| TPA: Homo sapiens tRNA-Gly-GCC-2-6 gene >gi|634721949|tpe|HG983815.1| TPA: Homo sapiens tRNA-Gly-GCC-2-2 gene >gi|634721951|tpe|HG983816.1| TPA: Homo sapiens tRNA-Gly-GCC-2-3 gene >gi|63472…	71	1	57	30
Urine EV replicated	tRF-31-PER8YP9LON4VD	31	HG983817	TPA: Homo sapiens tRNA-Gly-GCC-3-1 gene	71	1	57	30
Urine EV replicated	tRF-31-PER8YP9LON4VD	31	HG983819	TPA: Homo sapiens tRNA-Gly-GCC-5-1 gene	71	1	57	30
Urine EV replicated	tRF-31-PER8YP9LON4VD	31	HG984123	TPA: Homo sapiens tRNA-Val-CAC-8-1 gene	71	1	57	30
Urine EV replicated	tRF-27-J87383RPD95	27	AP000952	Homo sapiens genomic DNA, chromosome 21q21.1-q21.2 clone:B651M22, LL56-APP region, complete sequence	109374	1	54	27
Urine EV replicated	tRF-27-J87383RPD95	27	NG_092518	Homo sapiens H3K27ac-H3K4me1 hESC enhancer GRCh37_chr1:161420051-161420932 (LOC127270666) on chromosome 1	1082	1	54	27
Urine EV replicated	tRF-27-J87383RPD95	27	NG_092523	Homo sapiens H3K27ac-H3K4me1 hESC enhancer GRCh37_chr1:161427797-161428409 (LOC127270671) on chromosome 1	813	1	54	27
Urine EV replicated	tRF-27-J87383RPD95	27	NG_092513	Homo sapiens OCT4-H3K27ac-H3K4me1 hESC enhancer GRCh37_chr1:161413009-161413866 (LOC127270661) on chromosome 1	1058	1	54	27
Urine EV replicated	tRF-27-J87383RPD95	27	HG983806	TPA: Homo sapiens tRNA-Gly-GCC-1-1 gene >gi|634721934|tpe|HG983807.1| TPA: Homo sapiens tRNA-Gly-GCC-1-2 gene >gi|634721936|tpe|HG983808.1| TPA: Homo sapiens tRNA-Gly-GCC-1-3 gene >gi|634721937|tpe|HG983809.1| TPA: Homo sapiens tRNA-Gly-GCC-1-4 gene >gi|634721940|tpe|HG983810.1| TPA: Homo sapiens tRNA-Gly-GCC-1-5 gene >gi|634722980|tpe|HG984369.1| TPA: Mus musculus tRNA-Gly-GCC-1-1 gene >gi|63472…	71	1	54	27
Urine EV replicated	tRF-27-J87383RPD95	27	MW804191	Homo sapiens LHRI_LNC2269.1 lncRNA, complete sequence	549	1	52	26
Urine EV replicated	tRF-27-J87383RPD95	27	NG_009032	Homo sapiens collagen like tail subunit of asymmetric acetylcholinesterase (COLQ), RefSeqGene on chromosome 3	78619	1	49	26
Urine EV replicated	tRF-27-J87383RPD95	27	NG_066782	Homo sapiens CRISPRi-validated cis-regulatory element chr6.1315 (LOC116183052) on chromosome 6	1273	1	49	26
Urine EV replicated	tRF-27-J87383RPD95	27	NG_012066	Homo sapiens Fc gamma receptor IIa (FCGR2A), RefSeqGene (LRG_1109) on chromosome 1	25599	1	49	26
Urine EV replicated	tRF-27-J87383RPD95	27	NG_016606	Homo sapiens glycerol-3-phosphate dehydrogenase 2 (GPD2), RefSeqGene on chromosome 2; nuclear gene for mitochondrial product	193123	1	49	26
Urine EV replicated	tRF-27-J87383RPD95	27	NG_135431	Homo sapiens H3K4me1 hESC enhancer GRCh37_chr17:8029079-8029880 (LOC127885694) on chromosome 17	1002	1	49	26
Urine EV replicated	tRF-27-J87383RPD95	27	DQ521571	Homo sapiens heat shock 70kDa protein 6 (HSP70B') (HSPA6) gene, complete cds	6467	1	49	26
Urine EV replicated	tRF-27-J87383RPD95	27	NG_015816	Homo sapiens hes family bHLH transcription factor 7 (HES7), RefSeqGene on chromosome 17	10503	1	49	26
Urine EV replicated	tRF-27-J87383RPD95	27	NG_007563	Homo sapiens phosphate regulating endopeptidase X-linked (PHEX), RefSeqGene on chromosome X	225986	1	49	26
Urine EV replicated	tRF-27-J87383RPD95	27	DQ570956	Homo sapiens piRNA piR-31068, complete sequence	31	1	49	26
Urine EV replicated	tRF-27-J87383RPD95	27	DQ582567	Homo sapiens piRNA piR-32679, complete sequence	29	1	49	26
Urine EV replicated	tRF-27-J87383RPD95	27	DQ597218	Homo sapiens piRNA piR-35284, complete sequence	30	1	49	26
Urine EV replicated	tRF-27-J87383RPD95	27	DQ597916	Homo sapiens piRNA piR-35982, complete sequence	31	1	49	26
Urine EV replicated	tRF-27-J87383RPD95	27	NG_047170	Homo sapiens potassium voltage-gated channel subfamily Q member 5 (KCNQ5), RefSeqGene on chromosome 6	584572	1	49	26
Urine EV replicated	tRF-27-J87383RPD95	27	LC700394	Homo sapiens S8_B_EXO miRNA region, complete sequence	150	1	49	26
Urine EV replicated	tRF-27-J87383RPD95	27	NG_054902	Homo sapiens VAC14 component of PIKFYVE complex (VAC14), RefSeqGene on chromosome 16	120731	4	49	26,26,26,26
Urine EV replicated	tRF-27-J87383RPD95	27	NG_021200	Homo sapiens zinc finger C4H2-type containing (ZC4H2), RefSeqGene on chromosome X	125375	1	49	26
Urine EV replicated	tRF-27-J87383RPD95	27	XM_054335134	PREDICTED: Homo sapiens Fc gamma receptor IIa (FCGR2A), transcript variant X3, mRNA	1713	2	49	26,26
Urine EV replicated	tRF-27-J87383RPD95	27	XM_017000664	PREDICTED: Homo sapiens Fc gamma receptor IIa (FCGR2A), transcript variant X3, mRNA	1713	2	49	26,26
Urine EV replicated	tRF-27-J87383RPD95	27	XM_054335135	PREDICTED: Homo sapiens Fc gamma receptor IIa (FCGR2A), transcript variant X4, mRNA	1516	2	49	26,26
Urine EV replicated	tRF-27-J87383RPD95	27	XM_017000665	PREDICTED: Homo sapiens Fc gamma receptor IIa (FCGR2A), transcript variant X4, mRNA	1516	2	49	26,26
Urine EV replicated	tRF-27-J87383RPD95	27	XM_054317564	PREDICTED: Homo sapiens hes family bHLH transcription factor 7 (HES7), transcript variant X2, mRNA	2811	2	49	26,26
Urine EV replicated	tRF-27-J87383RPD95	27	XM_047436941	PREDICTED: Homo sapiens hes family bHLH transcription factor 7 (HES7), transcript variant X2, mRNA	2820	2	49	26,26
Urine EV replicated	tRF-27-J87383RPD95	27	XM_054317563	PREDICTED: Homo sapiens hes family bHLH transcription factor 7 (HES7), transcript variant X4, mRNA	3274	1	49	26
Urine EV replicated	tRF-27-J87383RPD95	27	XM_054365330	PREDICTED: Homo sapiens La ribonucleoprotein 4B (LARP4B), transcript variant X12, mRNA	22776	2	49	26,26
Urine EV replicated	tRF-27-J87383RPD95	27	XM_047424899	PREDICTED: Homo sapiens La ribonucleoprotein 4B (LARP4B), transcript variant X12, mRNA	22774	2	49	26,26
Urine EV replicated	tRF-27-J87383RPD95	27	XM_054365324	PREDICTED: Homo sapiens La ribonucleoprotein 4B (LARP4B), transcript variant X5, mRNA	25361	2	49	26,26
Urine EV replicated	tRF-27-J87383RPD95	27	XM_047424892	PREDICTED: Homo sapiens La ribonucleoprotein 4B (LARP4B), transcript variant X5, mRNA	25359	2	49	26,26
Urine EV replicated	tRF-27-J87383RPD95	27	XM_054365327	PREDICTED: Homo sapiens La ribonucleoprotein 4B (LARP4B), transcript variant X9, mRNA	25256	2	49	26,26
Urine EV replicated	tRF-27-J87383RPD95	27	XM_047424896	PREDICTED: Homo sapiens La ribonucleoprotein 4B (LARP4B), transcript variant X9, mRNA	25254	2	49	26,26
Urine EV replicated	tRF-27-J87383RPD95	27	HG983796	TPA: Homo sapiens tRNA-Gly-CCC-1-1 gene >gi|634721916|tpe|HG983797.1| TPA: Homo sapiens tRNA-Gly-CCC-1-2 gene	71	1	49	26
Urine EV replicated	tRF-27-J87383RPD95	27	HG983811	TPA: Homo sapiens tRNA-Gly-GCC-2-1 gene >gi|634721943|tpe|HG983812.1| TPA: Homo sapiens tRNA-Gly-GCC-2-4 gene >gi|634721946|tpe|HG983813.1| TPA: Homo sapiens tRNA-Gly-GCC-2-5 gene >gi|634721947|tpe|HG983814.1| TPA: Homo sapiens tRNA-Gly-GCC-2-6 gene >gi|634721949|tpe|HG983815.1| TPA: Homo sapiens tRNA-Gly-GCC-2-2 gene >gi|634721951|tpe|HG983816.1| TPA: Homo sapiens tRNA-Gly-GCC-2-3 gene >gi|63472…	71	1	49	26
Urine EV replicated	tRF-27-J87383RPD95	27	HG983817	TPA: Homo sapiens tRNA-Gly-GCC-3-1 gene	71	1	49	26
Urine EV replicated	tRF-27-J87383RPD95	27	HG983819	TPA: Homo sapiens tRNA-Gly-GCC-5-1 gene	71	1	49	26
Urine EV replicated	tRF-26-IK9NJ4S2I7D	26	AP000952	Homo sapiens genomic DNA, chromosome 21q21.1-q21.2 clone:B651M22, LL56-APP region, complete sequence	109374	1	52	26
Urine EV replicated	tRF-26-IK9NJ4S2I7D	26	NG_092518	Homo sapiens H3K27ac-H3K4me1 hESC enhancer GRCh37_chr1:161420051-161420932 (LOC127270666) on chromosome 1	1082	1	52	26
Urine EV replicated	tRF-26-IK9NJ4S2I7D	26	NG_092523	Homo sapiens H3K27ac-H3K4me1 hESC enhancer GRCh37_chr1:161427797-161428409 (LOC127270671) on chromosome 1	813	1	52	26
Urine EV replicated	tRF-26-IK9NJ4S2I7D	26	MW804191	Homo sapiens LHRI_LNC2269.1 lncRNA, complete sequence	549	1	52	26
Urine EV replicated	tRF-26-IK9NJ4S2I7D	26	NG_092513	Homo sapiens OCT4-H3K27ac-H3K4me1 hESC enhancer GRCh37_chr1:161413009-161413866 (LOC127270661) on chromosome 1	1058	1	52	26
Urine EV replicated	tRF-26-IK9NJ4S2I7D	26	HG983806	TPA: Homo sapiens tRNA-Gly-GCC-1-1 gene >gi|634721934|tpe|HG983807.1| TPA: Homo sapiens tRNA-Gly-GCC-1-2 gene >gi|634721936|tpe|HG983808.1| TPA: Homo sapiens tRNA-Gly-GCC-1-3 gene >gi|634721937|tpe|HG983809.1| TPA: Homo sapiens tRNA-Gly-GCC-1-4 gene >gi|634721940|tpe|HG983810.1| TPA: Homo sapiens tRNA-Gly-GCC-1-5 gene >gi|634722980|tpe|HG984369.1| TPA: Mus musculus tRNA-Gly-GCC-1-1 gene >gi|63472…	71	1	52	26
Urine EV replicated	tRF-26-IK9NJ4S2I7D	26	MN308825	Homo sapiens LNC_000188 lncRNA, complete sequence	430	1	50	25
Urine EV replicated	tRF-26-IK9NJ4S2I7D	26	NG_009032	Homo sapiens collagen like tail subunit of asymmetric acetylcholinesterase (COLQ), RefSeqGene on chromosome 3	78619	1	47	25
Urine EV replicated	tRF-26-IK9NJ4S2I7D	26	NG_066782	Homo sapiens CRISPRi-validated cis-regulatory element chr6.1315 (LOC116183052) on chromosome 6	1273	1	47	25
Urine EV replicated	tRF-26-IK9NJ4S2I7D	26	NG_012066	Homo sapiens Fc gamma receptor IIa (FCGR2A), RefSeqGene (LRG_1109) on chromosome 1	25599	1	47	25
Urine EV replicated	tRF-26-IK9NJ4S2I7D	26	NG_016606	Homo sapiens glycerol-3-phosphate dehydrogenase 2 (GPD2), RefSeqGene on chromosome 2; nuclear gene for mitochondrial product	193123	1	47	25
Urine EV replicated	tRF-26-IK9NJ4S2I7D	26	NG_135431	Homo sapiens H3K4me1 hESC enhancer GRCh37_chr17:8029079-8029880 (LOC127885694) on chromosome 17	1002	1	47	25
Urine EV replicated	tRF-26-IK9NJ4S2I7D	26	DQ521571	Homo sapiens heat shock 70kDa protein 6 (HSP70B') (HSPA6) gene, complete cds	6467	1	47	25
Urine EV replicated	tRF-26-IK9NJ4S2I7D	26	NG_015816	Homo sapiens hes family bHLH transcription factor 7 (HES7), RefSeqGene on chromosome 17	10503	1	47	25
Urine EV replicated	tRF-26-IK9NJ4S2I7D	26	NG_007563	Homo sapiens phosphate regulating endopeptidase X-linked (PHEX), RefSeqGene on chromosome X	225986	1	47	25
Urine EV replicated	tRF-26-IK9NJ4S2I7D	26	DQ570956	Homo sapiens piRNA piR-31068, complete sequence	31	1	47	25
Urine EV replicated	tRF-26-IK9NJ4S2I7D	26	DQ571812	Homo sapiens piRNA piR-31924, complete sequence >gi|485933072|gb|KC653925.1| Cricetulus griseus piRNA cgr_piR_019602, complete sequence	29	1	47	25
Urine EV replicated	tRF-26-IK9NJ4S2I7D	26	DQ571813	Homo sapiens piRNA piR-31925, complete sequence	31	1	47	25
Urine EV replicated	tRF-26-IK9NJ4S2I7D	26	DQ582567	Homo sapiens piRNA piR-32679, complete sequence	29	1	47	25
Urine EV replicated	tRF-26-IK9NJ4S2I7D	26	DQ597218	Homo sapiens piRNA piR-35284, complete sequence	30	1	47	25
Urine EV replicated	tRF-26-IK9NJ4S2I7D	26	DQ597916	Homo sapiens piRNA piR-35982, complete sequence	31	1	47	25
Urine EV replicated	tRF-26-IK9NJ4S2I7D	26	NG_047170	Homo sapiens potassium voltage-gated channel subfamily Q member 5 (KCNQ5), RefSeqGene on chromosome 6	584572	1	47	25
Urine EV replicated	tRF-26-IK9NJ4S2I7D	26	LC700394	Homo sapiens S8_B_EXO miRNA region, complete sequence	150	1	47	25
Urine EV replicated	tRF-26-IK9NJ4S2I7D	26	NG_054902	Homo sapiens VAC14 component of PIKFYVE complex (VAC14), RefSeqGene on chromosome 16	120731	4	47	25,25,25,25
Urine EV replicated	tRF-26-IK9NJ4S2I7D	26	NG_021200	Homo sapiens zinc finger C4H2-type containing (ZC4H2), RefSeqGene on chromosome X	125375	1	47	25
Urine EV replicated	tRF-26-IK9NJ4S2I7D	26	XM_054335134	PREDICTED: Homo sapiens Fc gamma receptor IIa (FCGR2A), transcript variant X3, mRNA	1713	2	47	25,25
Urine EV replicated	tRF-26-IK9NJ4S2I7D	26	XM_017000664	PREDICTED: Homo sapiens Fc gamma receptor IIa (FCGR2A), transcript variant X3, mRNA	1713	2	47	25,25
Urine EV replicated	tRF-26-IK9NJ4S2I7D	26	XM_054335135	PREDICTED: Homo sapiens Fc gamma receptor IIa (FCGR2A), transcript variant X4, mRNA	1516	2	47	25,25
Urine EV replicated	tRF-26-IK9NJ4S2I7D	26	XM_017000665	PREDICTED: Homo sapiens Fc gamma receptor IIa (FCGR2A), transcript variant X4, mRNA	1516	2	47	25,25
Urine EV replicated	tRF-26-IK9NJ4S2I7D	26	XM_054317564	PREDICTED: Homo sapiens hes family bHLH transcription factor 7 (HES7), transcript variant X2, mRNA	2811	2	47	25,25
Urine EV replicated	tRF-26-IK9NJ4S2I7D	26	XM_047436941	PREDICTED: Homo sapiens hes family bHLH transcription factor 7 (HES7), transcript variant X2, mRNA	2820	2	47	25,25
Urine EV replicated	tRF-26-IK9NJ4S2I7D	26	XM_054317563	PREDICTED: Homo sapiens hes family bHLH transcription factor 7 (HES7), transcript variant X4, mRNA	3274	1	47	25
Urine EV replicated	tRF-26-IK9NJ4S2I7D	26	XM_054365330	PREDICTED: Homo sapiens La ribonucleoprotein 4B (LARP4B), transcript variant X12, mRNA	22776	2	47	25,25
Urine EV replicated	tRF-26-IK9NJ4S2I7D	26	XM_047424899	PREDICTED: Homo sapiens La ribonucleoprotein 4B (LARP4B), transcript variant X12, mRNA	22774	2	47	25,25
Urine EV replicated	tRF-26-IK9NJ4S2I7D	26	XM_054365324	PREDICTED: Homo sapiens La ribonucleoprotein 4B (LARP4B), transcript variant X5, mRNA	25361	2	47	25,25
Urine EV replicated	tRF-26-IK9NJ4S2I7D	26	XM_047424892	PREDICTED: Homo sapiens La ribonucleoprotein 4B (LARP4B), transcript variant X5, mRNA	25359	2	47	25,25
Urine EV replicated	tRF-26-IK9NJ4S2I7D	26	XM_054365327	PREDICTED: Homo sapiens La ribonucleoprotein 4B (LARP4B), transcript variant X9, mRNA	25256	2	47	25,25
Urine EV replicated	tRF-26-IK9NJ4S2I7D	26	XM_047424896	PREDICTED: Homo sapiens La ribonucleoprotein 4B (LARP4B), transcript variant X9, mRNA	25254	2	47	25,25
Urine EV replicated	tRF-26-IK9NJ4S2I7D	26	HG983796	TPA: Homo sapiens tRNA-Gly-CCC-1-1 gene >gi|634721916|tpe|HG983797.1| TPA: Homo sapiens tRNA-Gly-CCC-1-2 gene	71	1	47	25
Urine EV replicated	tRF-26-IK9NJ4S2I7D	26	HG983811	TPA: Homo sapiens tRNA-Gly-GCC-2-1 gene >gi|634721943|tpe|HG983812.1| TPA: Homo sapiens tRNA-Gly-GCC-2-4 gene >gi|634721946|tpe|HG983813.1| TPA: Homo sapiens tRNA-Gly-GCC-2-5 gene >gi|634721947|tpe|HG983814.1| TPA: Homo sapiens tRNA-Gly-GCC-2-6 gene >gi|634721949|tpe|HG983815.1| TPA: Homo sapiens tRNA-Gly-GCC-2-2 gene >gi|634721951|tpe|HG983816.1| TPA: Homo sapiens tRNA-Gly-GCC-2-3 gene >gi|63472…	71	1	47	25
Urine EV replicated	tRF-26-IK9NJ4S2I7D	26	HG983817	TPA: Homo sapiens tRNA-Gly-GCC-3-1 gene	71	1	47	25
Urine EV replicated	tRF-26-IK9NJ4S2I7D	26	HG983819	TPA: Homo sapiens tRNA-Gly-GCC-5-1 gene	71	1	47	25
Urine EV replicated	tRF-25-7P596VW631	25	7LJ3_A	Chain A, RNA (75-MER)	75	1	50	25
Urine EV replicated	tRF-25-7P596VW631	25	7LJ3_B	Chain B, RNA (75-MER)	75	1	50	25
Urine EV replicated	tRF-25-7P596VW631	25	7LJ3_C	Chain C, RNA (75-MER)	75	1	50	25
Urine EV replicated	tRF-25-7P596VW631	25	AC078811	Homo sapiens 3 BAC RP11-309H18 (Roswell Park Cancer Institute Human BAC Library) complete sequence	72521	1	50	25
Urine EV replicated	tRF-25-7P596VW631	25	NG_092515	Homo sapiens H3K27ac-H3K4me1 hESC enhancer GRCh37_chr1:161416691-161417243 (LOC127270663) on chromosome 1	753	1	50	25
Urine EV replicated	tRF-25-7P596VW631	25	NG_092524	Homo sapiens H3K27ac-H3K4me1 hESC enhancer GRCh37_chr1:161431462-161431979 (LOC127270672) on chromosome 1	718	1	50	25
Urine EV replicated	tRF-25-7P596VW631	25	MN296948	Homo sapiens LHRI_LNC1645.1 lncRNA gene, complete sequence	237	1	50	25
Urine EV replicated	tRF-25-7P596VW631	25	MW803698	Homo sapiens LHRI_LNC2312.1 lncRNA, complete sequence	268	1	50	25
Urine EV replicated	tRF-25-7P596VW631	25	MW803699	Homo sapiens LHRI_LNC2312.2 lncRNA, complete sequence	1017	1	50	25
Urine EV replicated	tRF-25-7P596VW631	25	MW803700	Homo sapiens LHRI_LNC2312.3 lncRNA, complete sequence	311	1	50	25
Urine EV replicated	tRF-25-7P596VW631	25	NG_092520	Homo sapiens OCT4-H3K27ac-H3K4me1 hESC enhancer GRCh37_chr1:161424112-161424725 (LOC127270668) on chromosome 1	814	1	50	25
Urine EV replicated	tRF-25-7P596VW631	25	NG_008496	Homo sapiens tRNA-Glu (CTC) 12-1 (TRE-CTC12-1) pseudogene on chromosome 3	272	1	50	25
Urine EV replicated	tRF-25-7P596VW631	25	Z84476	Human DNA sequence from clone RP1-25J6 on chromosome 6p21.3 Contains the 5' end of the RFP gene for ret finger protein, a putative novel gene, a KRT18 (keratin 18) pseudogene, a novel zinc finger protein gene, olfactory receptor 2AD1 pseudogene OR2AD1P, ESTs, STSs and 3 CpG islands, complete sequence	112659	1	50	25
Urine EV replicated	tRF-25-7P596VW631	25	HG983753	TPA: Homo sapiens tRNA-Glu-CTC-1-1 gene >gi|634721825|tpe|HG983754.1| TPA: Homo sapiens tRNA-Glu-CTC-1-2 gene >gi|634721829|tpe|HG983755.1| TPA: Homo sapiens tRNA-Glu-CTC-1-3 gene >gi|634721830|tpe|HG983756.1| TPA: Homo sapiens tRNA-Glu-CTC-1-4 gene >gi|634721832|tpe|HG983757.1| TPA: Homo sapiens tRNA-Glu-CTC-1-5 gene >gi|634721834|tpe|HG983758.1| TPA: Homo sapiens tRNA-Glu-CTC-1-6 gene >gi|63472…	72	1	50	25
Urine EV replicated	tRF-25-7P596VW631	25	HG983770	TPA: Homo sapiens tRNA-Glu-CTC-12-1 gene	72	1	50	25
Urine EV replicated	tRF-25-7P596VW631	25	HG983760	TPA: Homo sapiens tRNA-Glu-CTC-2-1 gene	72	1	50	25
Urine EV replicated	tRF-25-7P596VW631	25	M31637	Human Glu-tRNA	75	1	47	24
Urine EV replicated	tRF-21-86J8WPMNB	21	Z59042	H.sapiens CpG island DNA genomic Mse1 fragment, clone 121a10, forward read cpg121a10.ft1a	291	1	42	21
Urine EV replicated	tRF-21-86J8WPMNB	21	HG983779	TPA: Homo sapiens tRNA-Glu-TTC-2-1 gene >gi|634721883|tpe|HG983780.1| TPA: Homo sapiens tRNA-Glu-TTC-2-2 gene >gi|634722948|tpe|HG984353.1| TPA: Mus musculus tRNA-Glu-TTC-1-1 gene >gi|634722950|tpe|HG984354.1| TPA: Mus musculus tRNA-Glu-TTC-1-2 gene >gi|634722953|tpe|HG984355.1| TPA: Mus musculus tRNA-Glu-TTC-1-3 gene >gi|634722955|tpe|HG984356.1| TPA: Mus musculus tRNA-Glu-TTC-1-4 gene >gi|63472…	72	1	42	21
Urine EV replicated	tRF-21-86J8WPMNB	21	MN297206	Homo sapiens LHRI_LNC2020.1 lncRNA gene, complete sequence	270	1	40	20
Urine EV replicated	tRF-21-86J8WPMNB	21	NG_046779	Homo sapiens coiled-coil domain containing 115 (CCDC115), RefSeqGene on chromosome 2	11878	1	37	20
Urine EV replicated	tRF-21-86J8WPMNB	21	HG983777	TPA: Homo sapiens tRNA-Glu-TTC-1-2 gene >gi|634721879|tpe|HG983778.1| TPA: Homo sapiens tRNA-Glu-TTC-1-1 gene	72	1	37	20
Urine EV replicated	tRF-20-40KK5Y93	20	AJ003147	Homo sapiens complete genomic sequence between D16S3070 and D16S3275, containing Familial Mediterranean Fever gene disease	239566	2	40	20,20
Urine EV replicated	tRF-20-40KK5Y93	20	AF091512	Homo sapiens familial mediterranean fever locus genomic sequence	87258	2	40	20,20
Urine EV replicated	tRF-20-40KK5Y93	20	NG_030012	Homo sapiens LUC7 like 2, pre-mRNA splicing factor (LUC7L2), RefSeqGene on chromosome 7	90079	1	40	20
Urine EV replicated	tRF-20-40KK5Y93	20	NG_137536	Homo sapiens OCT4-NANOG-H3K27ac-H3K4me1 hESC enhancer GRCh37_chr17:73029803-73030784 (LOC127887917) on chromosome 17	1182	2	40	20,20
Urine EV replicated	tRF-20-40KK5Y93	20	HG983609	TPA: Homo sapiens tRNA-Arg-CCT-5-1 gene	73	1	40	20
Urine EV replicated	tRF-20-40KK5Y93	20	HG983605	TPA: Mus musculus tRNA-Arg-CCT-1-1 gene >gi|634723545|tpe|HG984667.1| TPA: Rattus norvegicus tRNA-Arg-CCT-1-1 gene >gi|634723546|tpe|HG984668.1| TPA: Rattus norvegicus tRNA-Arg-CCT-1-2 gene >gi|634723547|tpe|HG984669.1| TPA: Rattus norvegicus tRNA-Arg-CCT-1-3 gene >gi|634726680|tpe|HG983605.1| TPA: Homo sapiens tRNA-Arg-CCT-1-1 gene	73	1	40	20
Urine EV replicated	tRF-20-40KK5Y93	20	HG983606	TPA: Mus musculus tRNA-Arg-CCT-2-1 gene >gi|634722724|tpe|HG984224.1| TPA: Mus musculus tRNA-Arg-CCT-2-2 gene >gi|634723550|tpe|HG984671.1| TPA: Rattus norvegicus tRNA-Arg-CCT-3-1 gene >gi|634726682|tpe|HG983606.1| TPA: Homo sapiens tRNA-Arg-CCT-2-1 gene	73	1	40	20
Urine EV replicated	tRF-20-40KK5Y93	20	HG983607	TPA: Mus musculus tRNA-Arg-CCT-3-1 gene >gi|634723552|tpe|HG984672.1| TPA: Rattus norvegicus tRNA-Arg-CCT-4-1 gene >gi|634726683|tpe|HG983607.1| TPA: Homo sapiens tRNA-Arg-CCT-3-1 gene	73	1	40	20
Urine EV replicated	tRF-20-40KK5Y93	20	HG983608	TPA: Mus musculus tRNA-Arg-CCT-4-1 gene >gi|634723553|tpe|HG984673.1| TPA: Rattus norvegicus tRNA-Arg-CCT-5-1 gene >gi|634726690|tpe|HG983608.1| TPA: Homo sapiens tRNA-Arg-CCT-4-1 gene	73	1	40	20
Urine EV replicated	tRF-20-40KK5Y93	20	AJ535831	Homo sapiens microRNA miR-163	21	1	38	19
Urine EV replicated	tRF-18-MBQ4NKDJ	18	6ZP4_1	Chain 1, tRNA >gi|1938876689|pdb|7A09|f Chain f, tRNA	75	1	36	18
Urine EV replicated	tRF-18-MBQ4NKDJ	18	4KZZ_j	Chain j, initiator Met-RNA-i >gi|2231579900|pdb|7TQL|3 Chain 3, Human Met-tRNAiMet	75	1	36	18
Urine EV replicated	tRF-18-MBQ4NKDJ	18	Z69292	H.sapiens tRNA-Met gene	825	1	36	18
Urine EV replicated	tRF-18-MBQ4NKDJ	18	NG_066782	Homo sapiens CRISPRi-validated cis-regulatory element chr6.1315 (LOC116183052) on chromosome 6	1273	1	36	18
Urine EV replicated	tRF-18-MBQ4NKDJ	18	MW804146	Homo sapiens LHRI_LNC2170.1 lncRNA, complete sequence	508	1	36	18
Urine EV replicated	tRF-18-MBQ4NKDJ	18	MW803861	Homo sapiens LHRI_LNC2366.1 lncRNA, complete sequence	203	1	36	18
Urine EV replicated	tRF-18-MBQ4NKDJ	18	MN296879	Homo sapiens LHRI_LNC718.1 lncRNA gene, complete sequence	240	1	36	18
Urine EV replicated	tRF-18-MBQ4NKDJ	18	DQ570849	Homo sapiens piRNA piR-30961, complete sequence	31	1	36	18
Urine EV replicated	tRF-18-MBQ4NKDJ	18	DQ582262	Homo sapiens piRNA piR-32374, complete sequence	31	1	36	18
Urine EV replicated	tRF-18-MBQ4NKDJ	18	DQ593325	Homo sapiens piRNA piR-33437, complete sequence	28	1	36	18
Urine EV replicated	tRF-18-MBQ4NKDJ	18	DQ597110	Homo sapiens piRNA piR-35176, complete sequence	32	1	36	18
Urine EV replicated	tRF-18-MBQ4NKDJ	18	NG_077957	Homo sapiens Sharpr-MPRA regulatory region 6095 (LOC123620075) on chromosome 6	495	1	36	18
Urine EV replicated	tRF-18-MBQ4NKDJ	18	K00328	Human initiator Met-tRNA-i >gi|175421|gb|K00329.1|MUSTRMI Mouse initiator Met-tRNA-i >gi|175569|gb|K00327.1|ONHTRMI Salmon initiator Met-tRNA-i >gi|176348|gb|K00330.1|XELTRMI X.laevis initiator Met-tRNA-i >gi|1048348538|pdb|5K0Y|N Chain N, tRNA >gi|1890516849|pdb|6FEC|N Chain N, Transfer RNA (75-MER) >gi|1938947666|pdb|6YBV|w Chain w, Initiator methionine tRNA >gi|1938954186|pdb|6ZMW|w Chain w, I…	75	1	36	18
Urine EV replicated	tRF-18-MBQ4NKDJ	18	M10957	Human initiator Met-tRNA mutant T54	141	1	36	18
Urine EV replicated	tRF-18-MBQ4NKDJ	18	J00310	Human Met-tRNA-i gene 1	270	1	36	18
Urine EV replicated	tRF-18-MBQ4NKDJ	18	J00311	Human met-tRNA-i gene 2 (clone lambda-htm2)	270	1	36	18
Urine EV replicated	tRF-18-MBQ4NKDJ	18	HG984136	TPA: Homo sapiens tRNA-iMet-CAT-1-1 gene >gi|634722582|tpe|HG984137.1| TPA: Homo sapiens tRNA-iMet-CAT-1-8 gene >gi|634722583|tpe|HG984138.1| TPA: Homo sapiens tRNA-iMet-CAT-1-2 gene >gi|634722585|tpe|HG984139.1| TPA: Homo sapiens tRNA-iMet-CAT-1-3 gene >gi|634722586|tpe|HG984140.1| TPA: Homo sapiens tRNA-iMet-CAT-1-4 gene >gi|634722588|tpe|HG984141.1| TPA: Homo sapiens tRNA-iMet-CAT-1-5 gene >gi…	72	1	36	18
Urine EV replicated	tRF-18-MBQ4NKDJ	18	HG984144	TPA: Homo sapiens tRNA-iMet-CAT-2-1 gene	72	1	36	18
Urine EV replicated	tRF-18-MBQ4NKDJ	18	HG984057	TPA: Homo sapiens tRNA-Thr-CGT-6-1 gene	72	1	36	18
Urine EV replicated	tRF-18-MBQ4NKDJ	18	DQ593275	Homo sapiens piRNA piR-33387, complete sequence	32	1	34	17
Urine EV replicated	tRF-18-MBQ4NKDJ	18	DQ597163	Homo sapiens piRNA piR-35229, complete sequence	29	1	34	17
Urine EV replicated	tRF-18-MBQ4NKDJ	18	DQ597886	Homo sapiens piRNA piR-35952, complete sequence	32	1	34	17
Urine EV replicated	tRF-17-I7XUK8N	17	4KR2_C	Chain C, Gly-tRNA-CCC >gi|636666299|pdb|4KR3|C Chain C, Gly-tRNA-CCC	74	1	34	17
Urine EV replicated	tRF-17-I7XUK8N	17	4QEI_C	Chain C, tRNA-Gly-CCC-2-2	69	1	34	17
Urine EV replicated	tRF-17-I7XUK8N	17	5E6M_C	Chain C, tRNA(Gly)	74	1	34	17
Urine EV replicated	tRF-17-I7XUK8N	17	5E6M_E	Chain E, tRNA(Gly)	74	1	34	17
Urine EV replicated	tRF-17-I7XUK8N	17	S70114	cytotoxic granule-associated RNA-binding protein p40-TIA-1 {5' region} [human, leukocytes, Genomic, 1019 nt]	1019	1	34	17
Urine EV replicated	tRF-17-I7XUK8N	17	NG_095460	Homo sapiens NANOG-H3K27ac-H3K4me1 hESC enhancer GRCh37_chr2:70475342-70476156 (LOC127273609) on chromosome 2	1015	1	34	17
Urine EV replicated	tRF-17-I7XUK8N	17	NG_029967	Homo sapiens TIA1 cytotoxic granule associated RNA binding protein (TIA1), RefSeqGene on chromosome 2	46204	1	34	17
Urine EV replicated	tRF-17-I7XUK8N	17	K00209	Human Gly-tRNA-CCC	74	1	34	17
Urine EV replicated	tRF-17-I7XUK8N	17	HG983798	TPA: Homo sapiens tRNA-Gly-CCC-2-2 gene >gi|634721920|tpe|HG983799.1| TPA: Homo sapiens tRNA-Gly-CCC-2-1 gene >gi|634722966|tpe|HG984362.1| TPA: Mus musculus tRNA-Gly-CCC-1-1 gene >gi|634722968|tpe|HG984363.1| TPA: Mus musculus tRNA-Gly-CCC-1-2 gene >gi|634723758|tpe|HG984792.1| TPA: Rattus norvegicus tRNA-Gly-CCC-2-1 gene >gi|634723759|tpe|HG984793.1| TPA: Rattus norvegicus tRNA-Gly-CCC-2-2 gene	71	1	34	17
Urine EV replicated	tRF-17-D9W1X6K	17	Z26636	H.sapiens gene for tRNA-Gly >gi|51870476|emb|X53366.1| H.sapiens tRNA-Gly gene	713	1	34	17
Urine EV replicated	tRF-17-D9W1X6K	17	NG_066782	Homo sapiens CRISPRi-validated cis-regulatory element chr6.1315 (LOC116183052) on chromosome 6	1273	1	34	17
Urine EV replicated	tRF-17-D9W1X6K	17	NG_012066	Homo sapiens Fc gamma receptor IIa (FCGR2A), RefSeqGene (LRG_1109) on chromosome 1	25599	1	34	17
Urine EV replicated	tRF-17-D9W1X6K	17	AP000952	Homo sapiens genomic DNA, chromosome 21q21.1-q21.2 clone:B651M22, LL56-APP region, complete sequence	109374	1	34	17
Urine EV replicated	tRF-17-D9W1X6K	17	NG_016606	Homo sapiens glycerol-3-phosphate dehydrogenase 2 (GPD2), RefSeqGene on chromosome 2; nuclear gene for mitochondrial product	193123	1	34	17
Urine EV replicated	tRF-17-D9W1X6K	17	NG_092518	Homo sapiens H3K27ac-H3K4me1 hESC enhancer GRCh37_chr1:161420051-161420932 (LOC127270666) on chromosome 1	1082	1	34	17
Urine EV replicated	tRF-17-D9W1X6K	17	NG_092523	Homo sapiens H3K27ac-H3K4me1 hESC enhancer GRCh37_chr1:161427797-161428409 (LOC127270671) on chromosome 1	813	1	34	17
Urine EV replicated	tRF-17-D9W1X6K	17	NG_135431	Homo sapiens H3K4me1 hESC enhancer GRCh37_chr17:8029079-8029880 (LOC127885694) on chromosome 17	1002	1	34	17
Urine EV replicated	tRF-17-D9W1X6K	17	DQ521571	Homo sapiens heat shock 70kDa protein 6 (HSP70B') (HSPA6) gene, complete cds	6467	1	34	17
Urine EV replicated	tRF-17-D9W1X6K	17	NG_015816	Homo sapiens hes family bHLH transcription factor 7 (HES7), RefSeqGene on chromosome 17	10503	1	34	17
Urine EV replicated	tRF-17-D9W1X6K	17	MW804191	Homo sapiens LHRI_LNC2269.1 lncRNA, complete sequence	549	1	34	17
Urine EV replicated	tRF-17-D9W1X6K	17	MN308825	Homo sapiens LNC_000188 lncRNA, complete sequence	430	1	34	17
Urine EV replicated	tRF-17-D9W1X6K	17	NG_092513	Homo sapiens OCT4-H3K27ac-H3K4me1 hESC enhancer GRCh37_chr1:161413009-161413866 (LOC127270661) on chromosome 1	1058	1	34	17
Urine EV replicated	tRF-17-D9W1X6K	17	NG_054902	Homo sapiens VAC14 component of PIKFYVE complex (VAC14), RefSeqGene on chromosome 16	120731	3	34	17,17,17
Urine EV replicated	tRF-17-D9W1X6K	17	K00208	Human Gly-tRNA-GCC >gi|175269|gb|M21527.1|MLMTRGA Moloney murine leukemia virus Gly-tRNA	74	1	34	17
Urine EV replicated	tRF-17-D9W1X6K	17	M13661	Human Gly-tRNA-GCC gene and pseudogene, complete cds	1362	2	34	17,17
Urine EV replicated	tRF-17-D9W1X6K	17	M20924	Human Gly-tRNA gene, clone lambda-Ht8	397	2	34	17,17
Urine EV replicated	tRF-17-D9W1X6K	17	M20923	Human Gly-tRNA gene, clone lambda-Ht8	947	2	34	17,17
Urine EV replicated	tRF-17-D9W1X6K	17	XM_054335134	PREDICTED: Homo sapiens Fc gamma receptor IIa (FCGR2A), transcript variant X3, mRNA	1713	2	34	17,17
Urine EV replicated	tRF-17-D9W1X6K	17	XM_017000664	PREDICTED: Homo sapiens Fc gamma receptor IIa (FCGR2A), transcript variant X3, mRNA	1713	2	34	17,17
Urine EV replicated	tRF-17-D9W1X6K	17	XM_054335135	PREDICTED: Homo sapiens Fc gamma receptor IIa (FCGR2A), transcript variant X4, mRNA	1516	2	34	17,17
Urine EV replicated	tRF-17-D9W1X6K	17	XM_017000665	PREDICTED: Homo sapiens Fc gamma receptor IIa (FCGR2A), transcript variant X4, mRNA	1516	2	34	17,17
Urine EV replicated	tRF-17-D9W1X6K	17	XM_054317564	PREDICTED: Homo sapiens hes family bHLH transcription factor 7 (HES7), transcript variant X2, mRNA	2811	2	34	17,17
Urine EV replicated	tRF-17-D9W1X6K	17	XM_047436941	PREDICTED: Homo sapiens hes family bHLH transcription factor 7 (HES7), transcript variant X2, mRNA	2820	2	34	17,17
Urine EV replicated	tRF-17-D9W1X6K	17	XM_054317563	PREDICTED: Homo sapiens hes family bHLH transcription factor 7 (HES7), transcript variant X4, mRNA	3274	1	34	17
Urine EV replicated	tRF-17-D9W1X6K	17	HG983806	TPA: Homo sapiens tRNA-Gly-GCC-1-1 gene >gi|634721934|tpe|HG983807.1| TPA: Homo sapiens tRNA-Gly-GCC-1-2 gene >gi|634721936|tpe|HG983808.1| TPA: Homo sapiens tRNA-Gly-GCC-1-3 gene >gi|634721937|tpe|HG983809.1| TPA: Homo sapiens tRNA-Gly-GCC-1-4 gene >gi|634721940|tpe|HG983810.1| TPA: Homo sapiens tRNA-Gly-GCC-1-5 gene >gi|634722980|tpe|HG984369.1| TPA: Mus musculus tRNA-Gly-GCC-1-1 gene >gi|63472…	71	1	34	17
Urine EV replicated	tRF-17-D9W1X6K	17	HG983811	TPA: Homo sapiens tRNA-Gly-GCC-2-1 gene >gi|634721943|tpe|HG983812.1| TPA: Homo sapiens tRNA-Gly-GCC-2-4 gene >gi|634721946|tpe|HG983813.1| TPA: Homo sapiens tRNA-Gly-GCC-2-5 gene >gi|634721947|tpe|HG983814.1| TPA: Homo sapiens tRNA-Gly-GCC-2-6 gene >gi|634721949|tpe|HG983815.1| TPA: Homo sapiens tRNA-Gly-GCC-2-2 gene >gi|634721951|tpe|HG983816.1| TPA: Homo sapiens tRNA-Gly-GCC-2-3 gene >gi|63472…	71	1	34	17
Urine EV replicated	tRF-17-D9W1X6K	17	HG983817	TPA: Homo sapiens tRNA-Gly-GCC-3-1 gene	71	1	34	17
Urine EV replicated	tRF-17-D9W1X6K	17	NG_089575	Homo sapiens H3K27ac-H3K4me1 hESC enhancer GRCh37_chr1:17053781-17054392 (LOC127267714) on chromosome 1	812	1	29	16
Urine EV replicated	tRF-17-8R6546J	17	NG_023327	Homo sapiens ATPase sarcoplasmic/endoplasmic reticulum Ca2+ transporting 1 (ATP2A1), RefSeqGene on chromosome 16	33022	1	32	16
Urine EV replicated	tRF-17-8R6546J	17	NG_128648	Homo sapiens H3K27ac-H3K4me1 hESC enhancer GRCh37_chr13:114813561-114814350 (LOC127827144) on chromosome 13	990	1	32	16
Urine EV replicated	tRF-16-F1R3WEE	16	Z60777	H.sapiens CpG island DNA genomic Mse1 fragment, clone 34b11, forward read cpg34b11.ft1a	285	1	32	16
Urine EV replicated	tRF-16-F1R3WEE	16	Z58783	H.sapiens CpG island DNA genomic Mse1 fragment, clone 50a4, forward read cpg50a4.ft1a	197	1	32	16
Urine EV replicated	tRF-16-F1R3WEE	16	AC093719	Homo sapiens 12 BAC RP11-549I9 (Roswell Park Cancer Institute Human BAC Library) complete sequence	79925	1	32	16
Urine EV replicated	tRF-16-F1R3WEE	16	AC126309	Homo sapiens 12 BAC RP11-592O2 (Roswell Park Cancer Institute Human BAC Library) complete sequence	121984	1	32	16
Urine EV replicated	tRF-16-F1R3WEE	16	AC007298	Homo sapiens 12q22 BAC RPCI11-256L6 (Roswell Park Cancer Institute Human BAC Library) complete sequence	201572	1	32	16
Urine EV replicated	tRF-16-F1R3WEE	16	AK000590	Homo sapiens cDNA FLJ20583 fis, clone KAT09685 >gi|62897804|dbj|AK223122.1| Homo sapiens mRNA for Cohen syndrome 1 protein isoform 4 variant, clone: KAT09685	1673	1	32	16
Urine EV replicated	tRF-16-F1R3WEE	16	AK294137	Homo sapiens cDNA FLJ57265 complete cds, highly similar to Neurotrimin precursor	1427	1	32	16
Urine EV replicated	tRF-16-F1R3WEE	16	NG_092516	Homo sapiens H3K27ac-H3K4me1 hESC enhancer GRCh37_chr1:161417401-161418284 (LOC127270664) on chromosome 1	1084	1	32	16
Urine EV replicated	tRF-16-F1R3WEE	16	U65080	Homo sapiens leukotriene A4 hydrolase (LTA4) gene, promoter region and partial cds	2242	1	32	16
Urine EV replicated	tRF-16-F1R3WEE	16	MW804024	Homo sapiens LHRI_LNC2547.1 lncRNA, complete sequence	421	1	32	16
Urine EV replicated	tRF-16-F1R3WEE	16	AB330779	Homo sapiens RNA, tRNaseZL-interacting RNA A11	31	1	32	16
Urine EV replicated	tRF-16-F1R3WEE	16	AB330774	Homo sapiens RNA, tRNaseZL-interacting RNA A6	39	1	32	16
Urine EV replicated	tRF-16-F1R3WEE	16	AF037471	Homo sapiens tRNA-Asp gene, complete sequence	410	1	32	16
Urine EV replicated	tRF-16-F1R3WEE	16	XR_007076674	PREDICTED: Homo sapiens uncharacterized LOC105375001 (LOC105375001), transcript variant X2, ncRNA	5888	1	32	16
Urine EV replicated	tRF-16-F1R3WEE	16	HG983665	TPA: Homo sapiens tRNA-Asp-GTC-2-1 gene >gi|634721645|tpe|HG983666.1| TPA: Homo sapiens tRNA-Asp-GTC-2-2 gene >gi|634721648|tpe|HG983667.1| TPA: Homo sapiens tRNA-Asp-GTC-2-3 gene >gi|634721650|tpe|HG983668.1| TPA: Homo sapiens tRNA-Asp-GTC-2-4 gene >gi|634721653|tpe|HG983669.1| TPA: Homo sapiens tRNA-Asp-GTC-2-5 gene >gi|634721655|tpe|HG983670.1| TPA: Homo sapiens tRNA-Asp-GTC-2-8 gene >gi|63472…	72	1	32	16
Urine EV replicated	tRF-16-F1R3WEE	16	HG983676	TPA: Homo sapiens tRNA-Asp-GTC-3-1 gene	72	1	32	16
Urine EV replicated	tRF-16-F1R3WEE	16	HG983677	TPA: Homo sapiens tRNA-Asp-GTC-4-1 gene	72	1	32	16
Urine EV replicated	tRF-16-F1R3WEE	16	AJ331685	Homo sapiens genomic sequence surrounding NotI site, clone NR5-GI6C	764	1	30	15

## Sheet: raw
file	query_def	query_len	hit_def	hit_accession	hit_len	hsp_identity	hsp_positive	hsp_score	hsp_query_start	hsp_query_end	hsp_hit_start	hsp_hit_end	hsp_gaps
Serum_replicated	tRF-16-F1R3WEE	16	Homo sapiens H3K27ac-H3K4me1 hESC enhancer GRCh37_chr1:161417401-161418284 (LOC127270664) on chromosome 1	NG_092516	1084	16	16	16	1	16	761	746	0
Serum_replicated	tRF-16-F1R3WEE	16	PREDICTED: Homo sapiens uncharacterized LOC105375001 (LOC105375001), transcript variant X2, ncRNA	XR_007076674	5888	16	16	16	1	16	4810	4825	0
Serum_replicated	tRF-16-F1R3WEE	16	Homo sapiens LHRI_LNC2547.1 lncRNA, complete sequence	MW804024	421	16	16	16	1	16	181	196	0
Serum_replicated	tRF-16-F1R3WEE	16	TPA: Homo sapiens tRNA-Asp-GTC-4-1 gene	HG983677	72	16	16	16	1	16	44	59	0
Serum_replicated	tRF-16-F1R3WEE	16	TPA: Homo sapiens tRNA-Asp-GTC-3-1 gene	HG983676	72	16	16	16	1	16	44	59	0
Serum_replicated	tRF-16-F1R3WEE	16	TPA: Homo sapiens tRNA-Asp-GTC-2-1 gene >gi|634721645|tpe|HG983666.1| TPA: Homo sapiens tRNA-Asp-GTC-2-2 gene >gi|634721648|tpe|HG983667.1| TPA: Homo sapiens tRNA-Asp-GTC-2-3 gene >gi|634721650|tpe|HG983668.1| TPA: Homo sapiens tRNA-Asp-GTC-2-4 gene >gi|634721653|tpe|HG983669.1| TPA: Homo sapiens tRNA-Asp-GTC-2-5 gene >gi|634721655|tpe|HG983670.1| TPA: Homo sapiens tRNA-Asp-GTC-2-8 gene >gi|63472…	HG983665	72	16	16	16	1	16	44	59	0
Serum_replicated	tRF-16-F1R3WEE	16	Homo sapiens isolate CHM13 chromosome 17	CP068261	84276897	16	16	16	1	16	8128494	8128479	0
Serum_replicated	tRF-16-F1R3WEE	16	Homo sapiens isolate CHM13 chromosome 17	CP068261	84276897	12	12	12	2	13	4972060	4972071	0
Serum_replicated	tRF-16-F1R3WEE	16	Homo sapiens isolate CHM13 chromosome 17	CP068261	84276897	12	12	12	1	12	43651691	43651680	0
Serum_replicated	tRF-16-F1R3WEE	16	Homo sapiens isolate CHM13 chromosome 17	CP068261	84276897	12	12	12	1	12	50443280	50443291	0
Serum_replicated	tRF-16-F1R3WEE	16	Homo sapiens isolate CHM13 chromosome 17	CP068261	84276897	12	12	12	1	12	57089480	57089469	0
Serum_replicated	tRF-16-F1R3WEE	16	Homo sapiens isolate CHM13 chromosome 17	CP068261	84276897	12	12	12	4	15	58759712	58759701	0
Serum_replicated	tRF-16-F1R3WEE	16	Homo sapiens isolate CHM13 chromosome 17	CP068261	84276897	12	12	12	1	12	72975474	72975485	0
Serum_replicated	tRF-16-F1R3WEE	16	Homo sapiens BAC clone CH17-437O13 from chromosome 1, complete sequence	AC243971	241302	16	16	16	1	16	4935	4920	0
Serum_replicated	tRF-16-F1R3WEE	16	Homo sapiens BAC clone CH17-282E19 from chromosome 1, complete sequence	AC244471	204059	16	16	16	1	16	2465	2480	0
Serum_replicated	tRF-16-F1R3WEE	16	Homo sapiens BAC clone CH17-282E19 from chromosome 1, complete sequence	AC244471	204059	16	16	16	1	16	11748	11763	0
Serum_replicated	tRF-16-F1R3WEE	16	Homo sapiens DNA, chromosome 17, nearly complete genome	AP023477	80688777	16	16	16	1	16	8305257	8305242	0
Serum_replicated	tRF-16-F1R3WEE	16	Homo sapiens DNA, chromosome 17, nearly complete genome	AP023477	80688777	12	12	12	2	13	5155556	5155567	0
Serum_replicated	tRF-16-F1R3WEE	16	Homo sapiens DNA, chromosome 17, nearly complete genome	AP023477	80688777	12	12	12	1	12	40549768	40549757	0
Serum_replicated	tRF-16-F1R3WEE	16	Homo sapiens DNA, chromosome 17, nearly complete genome	AP023477	80688777	12	12	12	1	12	47017049	47017060	0
Serum_replicated	tRF-16-F1R3WEE	16	Homo sapiens DNA, chromosome 17, nearly complete genome	AP023477	80688777	12	12	12	1	12	53662701	53662690	0
Serum_replicated	tRF-16-F1R3WEE	16	Homo sapiens DNA, chromosome 17, nearly complete genome	AP023477	80688777	12	12	12	4	15	55337201	55337190	0
Serum_replicated	tRF-16-F1R3WEE	16	Homo sapiens DNA, chromosome 17, nearly complete genome	AP023477	80688777	12	12	12	1	12	69570784	69570795	0
Serum_replicated	tRF-16-F1R3WEE	16	Homo sapiens BAC clone CH17-135E1 from chromosome 1, complete sequence	AC243509	129689	16	16	16	1	16	7574	7559	0
Serum_replicated	tRF-16-F1R3WEE	16	Homo sapiens BAC clone CH17-135E1 from chromosome 1, complete sequence	AC243509	129689	16	16	16	1	16	22374	22359	0
Serum_replicated	tRF-16-F1R3WEE	16	Homo sapiens BAC clone CH17-220A1 from chromosome 1, complete sequence	AC243546	112430	16	16	16	1	16	36808	36823	0
Serum_replicated	tRF-16-F1R3WEE	16	Homo sapiens BAC clone CH17-220A1 from chromosome 1, complete sequence	AC243546	112430	16	16	16	1	16	77276	77291	0
Serum_replicated	tRF-16-F1R3WEE	16	Homo sapiens BAC clone CH17-220A1 from chromosome 1, complete sequence	AC243546	112430	16	16	16	1	16	91415	91430	0
Serum_replicated	tRF-16-F1R3WEE	16	Homo sapiens FOSMID clone COR2A-DD0002RZJNU_O5 from chromosome 1, complete sequence	AC243811	33627	16	16	16	1	16	28792	28777	0
Serum_replicated	tRF-16-F1R3WEE	16	Homo sapiens FOSMID clone ABC9-43348300F22 from chromosome 1, complete sequence	AC212909	36847	16	16	16	1	16	19645	19630	0
Serum_replicated	tRF-16-F1R3WEE	16	Homo sapiens FOSMID clone ABC9-43348300F22 from chromosome 1, complete sequence	AC212909	36847	16	16	16	1	16	27062	27047	0
Serum_replicated	tRF-16-F1R3WEE	16	Homo sapiens FOSMID clone ABC9-43348300F22 from chromosome 1, complete sequence	AC212909	36847	16	16	16	1	16	34420	34405	0
Serum_replicated	tRF-16-F1R3WEE	16	Homo sapiens RNA, tRNaseZL-interacting RNA A11	AB330779	31	16	16	16	1	16	5	20	0
Serum_replicated	tRF-16-F1R3WEE	16	Homo sapiens RNA, tRNaseZL-interacting RNA A6	AB330774	39	16	16	16	1	16	12	27	0
Serum_replicated	tRF-16-F1R3WEE	16	Homo sapiens FOSMID clone ABC9-41270100I10 from chromosome unknown, complete sequence	AC234785	40960	16	16	16	1	16	36679	36694	0
Serum_replicated	tRF-16-F1R3WEE	16	Homo sapiens FOSMID clone ABC10-45493400M8 from chromosome unknown, complete sequence	AC235029	40550	16	16	16	1	16	36631	36646	0
Serum_replicated	tRF-16-F1R3WEE	16	Homo sapiens FOSMID clone ABC9-43843900G11 from chromosome 1, complete sequence	AC211967	39767	16	16	16	1	16	4207	4192	0
Serum_replicated	tRF-16-F1R3WEE	16	Homo sapiens FOSMID clone ABC9-43843900G11 from chromosome 1, complete sequence	AC211967	39767	16	16	16	1	16	11621	11606	0
Serum_replicated	tRF-16-F1R3WEE	16	Homo sapiens FOSMID clone ABC9-43843900G11 from chromosome 1, complete sequence	AC211967	39767	16	16	16	1	16	19023	19008	0
Serum_replicated	tRF-16-F1R3WEE	16	Homo sapiens cDNA FLJ57265 complete cds, highly similar to Neurotrimin precursor	AK294137	1427	16	16	16	1	16	6	21	0
Serum_replicated	tRF-16-F1R3WEE	16	Homo sapiens FOSMID clone ABC9-44043600G17 from chromosome 1, complete sequence	AC207076	40742	16	16	16	1	16	6076	6091	0
Serum_replicated	tRF-16-F1R3WEE	16	Homo sapiens 12q22 BAC RPCI11-256L6 (Roswell Park Cancer Institute Human BAC Library) complete sequence	AC007298	201572	16	16	16	1	16	145323	145308	0
Serum_replicated	tRF-16-F1R3WEE	16	Homo sapiens cDNA FLJ46625 fis, clone TLUNG2002578	AK128480	1895	16	16	16	1	16	6	21	0
Serum_replicated	tRF-16-F1R3WEE	16	Human DNA sequence from clone RP11-5K23 on chromosome 1, complete sequence	AL590385	129505	16	16	16	1	16	4930	4915	0
Serum_replicated	tRF-16-F1R3WEE	16	Human DNA sequence from clone RP11-5K23 on chromosome 1, complete sequence	AL590385	129505	16	16	16	1	16	12311	12296	0
Serum_replicated	tRF-16-F1R3WEE	16	Human DNA sequence from clone RP11-5K23 on chromosome 1, complete sequence	AL590385	129505	16	16	16	1	16	19721	19706	0
Serum_replicated	tRF-16-F1R3WEE	16	Human DNA sequence from clone RP11-5K23 on chromosome 1, complete sequence	AL590385	129505	16	16	16	1	16	27102	27087	0
Serum_replicated	tRF-16-F1R3WEE	16	Human DNA sequence from clone RP13-389K14 on chromosome 1, complete sequence	AL831711	8801	16	16	16	1	16	4331	4316	0
Serum_replicated	tRF-16-F1R3WEE	16	Human DNA sequence from clone RP11-197P3 on chromosome 9, complete sequence	AL158825	127399	16	16	16	1	16	1582	1567	0
Serum_replicated	tRF-16-F1R3WEE	16	Human DNA sequence from clone SCb-34I8 on chromosome 6p21.3-22.1, complete sequence	AL021918	159506	16	16	16	1	16	28625	28640	0
Serum_replicated	tRF-16-F1R3WEE	16	Human DNA sequence from clone SCb-34I8 on chromosome 6p21.3-22.1, complete sequence	AL021918	159506	16	16	16	1	16	52695	52710	0
Serum_replicated	tRF-16-F1R3WEE	16	Human DNA sequence from clone SCb-34I8 on chromosome 6p21.3-22.1, complete sequence	AL021918	159506	16	16	16	1	16	132393	132378	0
Serum_replicated	tRF-16-F1R3WEE	16	Homo sapiens chromosome 17, clone RP11-849F2, complete sequence	AC135178	188340	16	16	16	1	16	162317	162332	0
Serum_replicated	tRF-16-F1R3WEE	16	Homo sapiens 12 BAC RP11-549I9 (Roswell Park Cancer Institute Human BAC Library) complete sequence	AC093719	79925	16	16	16	1	16	67892	67907	0
Serum_replicated	tRF-16-F1R3WEE	16	Homo sapiens 12 BAC RP11-592O2 (Roswell Park Cancer Institute Human BAC Library) complete sequence	AC126309	121984	16	16	16	1	16	119710	119695	0
Serum_replicated	tRF-16-F1R3WEE	16	Homo sapiens cDNA FLJ20583 fis, clone KAT09685 >gi|62897804|dbj|AK223122.1| Homo sapiens mRNA for Cohen syndrome 1 protein isoform 4 variant, clone: KAT09685	AK000590	1673	16	16	16	1	16	5	20	0
Serum_replicated	tRF-16-F1R3WEE	16	Homo sapiens tRNA-Asp gene, complete sequence	AF037471	410	16	16	16	1	16	356	371	0
Serum_replicated	tRF-16-F1R3WEE	16	Homo sapiens leukotriene A4 hydrolase (LTA4) gene, promoter region and partial cds	U65080	2242	16	16	16	1	16	1695	1680	0
Serum_replicated	tRF-16-F1R3WEE	16	H.sapiens CpG island DNA genomic Mse1 fragment, clone 34b11, forward read cpg34b11.ft1a	Z60777	285	16	16	16	1	16	52	37	0
Serum_replicated	tRF-16-F1R3WEE	16	H.sapiens CpG island DNA genomic Mse1 fragment, clone 50a4, forward read cpg50a4.ft1a	Z58783	197	16	16	16	1	16	38	23	0
Serum_replicated	tRF-16-F1R3WEE	16	Homo sapiens genomic sequence surrounding NotI site, clone NR5-GI6C	AJ331685	764	15	15	15	1	15	314	300	0
Serum_replicated	tRF-16-F1R3WEE	16	Homo sapiens chromosome 5 clone VMRC59-364P20, complete sequence	AC278615	165013	14	14	14	3	16	148374	148387	0
Serum_replicated	tRF-16-F1R3WEE	16	Homo sapiens B double prime 1, subunit of RNA polymerase III transcription initiation factor IIIB (BDP1), RefSeqGene on chromosome 5	NG_047017	132680	14	14	14	3	16	37304	37317	0
Serum_replicated	tRF-16-F1R3WEE	16	Homo sapiens isolate CHM13 chromosome 19	CP068259	61707364	14	14	14	1	14	49339464	49339477	0
Serum_replicated	tRF-16-F1R3WEE	16	Homo sapiens isolate CHM13 chromosome 19	CP068259	61707364	12	12	12	1	12	18367834	18367845	0
Serum_replicated	tRF-16-F1R3WEE	16	Homo sapiens isolate CHM13 chromosome 19	CP068259	61707364	12	12	12	2	13	19352771	19352782	0
Serum_replicated	tRF-16-F1R3WEE	16	Homo sapiens isolate CHM13 chromosome 19	CP068259	61707364	12	12	12	5	16	52766906	52766895	0
Serum_replicated	tRF-16-F1R3WEE	16	Homo sapiens isolate CHM13 chromosome 19	CP068259	61707364	12	12	12	1	12	52924088	52924077	0
Serum_replicated	tRF-16-F1R3WEE	16	Homo sapiens isolate CHM13 chromosome 18	CP068260	80542538	14	14	14	1	14	63261957	63261944	0
Serum_replicated	tRF-16-F1R3WEE	16	Homo sapiens isolate CHM13 chromosome 18	CP068260	80542538	12	12	12	1	12	24929472	24929483	0
Serum_replicated	tRF-16-F1R3WEE	16	Homo sapiens isolate CHM13 chromosome 18	CP068260	80542538	12	12	12	1	12	70670210	70670221	0
Serum_replicated	tRF-16-F1R3WEE	16	Chain x, E-site tRNA >gi|1979418401|pdb|6I7O|m Chain m, E-site tRNA >gi|1979438695|pdb|6Q8Y|m Chain m, E-site tRNA >gi|1979444196|pdb|6T4Q|7 Chain 7, tRNA (E/E) >gi|1979444410|pdb|6T7I|7 Chain 7, tRNA (E-site) >gi|2015436043|pdb|6Z6L|CC Chain CC, tRNA >gi|2015436226|pdb|6Z6N|CC Chain CC, tRNA >gi|2015437062|pdb|6ZM7|CC Chain CC, tRNA >gi|2015437153|pdb|6ZME|CC Chain CC, tRNA >gi|2015437249|pdb|6Z…	6ZVH_x	75	14	14	14	1	14	44	57	0
Serum_replicated	tRF-16-F1R3WEE	16	Homo sapiens BAC clone CH17-468I21 from chromosome 5, complete sequence	AC245931	210760	14	14	14	3	16	13603	13590	0
Serum_replicated	tRF-16-F1R3WEE	16	Homo sapiens DNA, chromosome 19, nearly complete genome	AP023479	59105444	14	14	14	1	14	46676924	46676937	0
Serum_replicated	tRF-16-F1R3WEE	16	Homo sapiens DNA, chromosome 19, nearly complete genome	AP023479	59105444	12	12	12	1	12	18125495	18125506	0
Serum_replicated	tRF-16-F1R3WEE	16	Homo sapiens DNA, chromosome 19, nearly complete genome	AP023479	59105444	12	12	12	2	13	19109498	19109509	0
Serum_replicated	tRF-16-F1R3WEE	16	Homo sapiens DNA, chromosome 19, nearly complete genome	AP023479	59105444	12	12	12	5	16	50054346	50054335	0
Serum_replicated	tRF-16-F1R3WEE	16	Homo sapiens DNA, chromosome 19, nearly complete genome	AP023479	59105444	12	12	12	1	12	50211558	50211547	0
Serum_replicated	tRF-16-F1R3WEE	16	Homo sapiens DNA, chromosome 18, nearly complete genome	AP023478	77846715	14	14	14	1	14	60515283	60515270	0
Serum_replicated	tRF-16-F1R3WEE	16	Homo sapiens DNA, chromosome 18, nearly complete genome	AP023478	77846715	12	12	12	1	12	67979344	67979355	0
Serum_replicated	tRF-16-F1R3WEE	16	Homo sapiens chromosome 5 clone RP11-615D2, complete sequence	AC138908	201419	14	14	14	3	16	108324	108311	0
Serum_replicated	tRF-16-F1R3WEE	16	Homo sapiens chromosome 19 clone CTB-158D10, complete sequence	AC011484	112351	14	14	14	1	14	96210	96223	0
Serum_replicated	tRF-16-F1R3WEE	16	Homo sapiens chromosome 5 clone CTD-2173D20, complete sequence	AC008851	130416	14	14	14	3	16	88986	88973	0
Serum_replicated	tRF-16-F1R3WEE	16	Homo sapiens chromosome 5 clone RP11-1308P14, complete sequence	AC138850	188885	14	14	14	3	16	13241	13228	0
Serum_replicated	tRF-16-F1R3WEE	16	Homo sapiens chromosome 5 clone RP11-1174L13, complete sequence	AC138832	225384	14	14	14	3	16	98627	98640	0
Serum_replicated	tRF-16-F1R3WEE	16	Homo sapiens chromosome 5 clone RP11-214M1, complete sequence	AC108106	160701	14	14	14	3	16	148305	148318	0
Serum_replicated	tRF-16-F1R3WEE	16	Homo sapiens chromosome 5 clone RP11-800G17, complete sequence	AC138948	172404	14	14	14	3	16	101105	101092	0
Serum_replicated	tRF-16-F1R3WEE	16	Homo sapiens chromosome 5 clone RP11-1099E10, complete sequence	AC138817	185785	14	14	14	3	16	83652	83639	0
Serum_replicated	tRF-16-F1R3WEE	16	Homo sapiens chromosome 8, clone RP11-1146N6, complete sequence	AC131568	150697	14	14	14	1	14	82319	82306	0
Serum_replicated	tRF-16-F1R3WEE	16	Homo sapiens chromosome 18, clone RP11-159K14, complete sequence	AC021299	168716	14	14	14	1	14	115923	115910	0
Serum_replicated	tRF-16-F1R3WEE	16	Homo sapiens genomic sequence surrounding NotI site, clone NL1-ZF11RS	AJ331802	841	14	14	14	2	15	84	97	0
Serum_replicated	tRF-16-F1R3WEE	16	Homo sapiens 4-hydroxyphenylpyruvate dioxygenase (HPD), RefSeqGene on chromosome 12	NG_016461	56085	13	13	13	1	13	45114	45102	0
Serum_replicated	tRF-16-F1R3WEE	16	Homo sapiens chromosome 5 clone CTD-2383I20, complete sequence	AC025187	137219	13	13	13	4	16	44060	44048	0
Serum_replicated	tRF-16-F1R3WEE	16	Homo sapiens 12 BAC RP11-7M8 (Roswell Park Cancer Institute Human BAC Library) complete sequence	AC079360	42588	13	13	13	1	13	17913	17925	0
Serum_replicated	tRF-16-F1R3WEE	16	Homo sapiens BAC clone RP11-30G7 from 2, complete sequence	AC104782	150010	13	13	13	4	16	51928	51940	0
Serum_replicated	tRF-16-F1R3WEE	16	Human integrated adenovirus 2 VA RNA	M35961	156	13	13	13	2	14	55	67	0
Serum_replicated	tRF-16-F1R3WEE	16	PREDICTED: Homo sapiens serpin family H member 1 (SERPINH1), transcript variant X3, mRNA	XM_054370355	2275	12	12	12	1	12	1703	1714	0
Serum_replicated	tRF-16-F1R3WEE	16	PREDICTED: Homo sapiens serpin family H member 1 (SERPINH1), transcript variant X2, mRNA	XM_054370354	2464	12	12	12	1	12	1892	1903	0
Serum_replicated	tRF-16-F1R3WEE	16	PREDICTED: Homo sapiens serpin family H member 1 (SERPINH1), transcript variant X1, mRNA	XM_054370353	2596	12	12	12	1	12	2024	2035	0
Serum_replicated	tRF-16-F1R3WEE	16	PREDICTED: Homo sapiens interferon lambda receptor 1 (IFNLR1), transcript variant X3, mRNA	XM_054334739	4553	12	12	12	1	12	2193	2204	0
Serum_replicated	tRF-16-F1R3WEE	16	PREDICTED: Homo sapiens interferon lambda receptor 1 (IFNLR1), transcript variant X2, mRNA	XM_054334738	4577	12	12	12	1	12	2217	2228	0
Serum_replicated	tRF-16-F1R3WEE	16	PREDICTED: Homo sapiens interferon lambda receptor 1 (IFNLR1), transcript variant X1, mRNA	XM_054334737	4614	12	12	12	1	12	2254	2265	0
Serum_replicated	tRF-16-F1R3WEE	16	Homo sapiens H3K27ac hESC enhancer GRCh37_chr19:50269954-50270722 (LOC127892019) on chromosome 19	NG_141848	969	12	12	12	5	16	165	154	0
Serum_replicated	tRF-16-F1R3WEE	16	Homo sapiens H3K27ac hESC enhancer GRCh37_chr17:4981230-4982101 (LOC127885566) on chromosome 17	NG_135307	1072	12	12	12	2	13	839	850	0
Serum_replicated	tRF-16-F1R3WEE	16	Homo sapiens H3K27ac hESC enhancer GRCh37_chr15:41408121-41408900 (LOC127829349) on chromosome 15	NG_130831	980	12	12	12	3	14	613	624	0
Serum_replicated	tRF-16-F1R3WEE	16	Homo sapiens H3K27ac-H3K4me1 hESC enhancer GRCh37_chr10:105396445-105397024 (LOC127819107) on chromosome 10	NG_120579	780	12	12	12	5	16	587	598	0
Serum_replicated	tRF-16-F1R3WEE	16	Homo sapiens H3K4me1 hESC enhancer GRCh37_chr1:176065569-176066068 (LOC127270875) on chromosome 1	NG_092727	700	12	12	12	4	15	600	611	0
Serum_replicated	tRF-16-F1R3WEE	16	Homo sapiens TNF superfamily member 4 (TNFSF4), RefSeqGene on chromosome 1	NG_011477	284864	12	12	12	1	12	10018	10029	0
Serum_replicated	tRF-16-F1R3WEE	16	Homo sapiens exocyst complex component 4 (EXOC4), RefSeqGene on chromosome 7	NG_047176	854874	15	15	12	1	16	249697	249682	0
Serum_replicated	tRF-16-F1R3WEE	16	Homo sapiens AGBL carboxypeptidase 1 (AGBL1), RefSeqGene on chromosome 15	NG_033836	958857	12	12	12	1	12	739429	739440	0
Serum_replicated	tRF-16-F1R3WEE	16	Homo sapiens tripartite motif containing 67 (TRIM67), transcript variant 3, mRNA	NM_001410937	9383	12	12	12	3	14	1877	1866	0
Serum_replicated	tRF-16-F1R3WEE	16	PREDICTED: Homo sapiens long intergenic non-protein coding RNA 2674 (LINC02674), transcript variant X3, ncRNA	XR_007081007	2180	12	12	12	1	12	1727	1716	0
Serum_replicated	tRF-16-F1R3WEE	16	PREDICTED: Homo sapiens long intergenic non-protein coding RNA 2674 (LINC02674), transcript variant X2, ncRNA	XR_007081006	2918	12	12	12	1	12	2465	2454	0
Serum_replicated	tRF-16-F1R3WEE	16	PREDICTED: Homo sapiens long intergenic non-protein coding RNA 2674 (LINC02674), transcript variant X1, ncRNA	XR_007081005	2372	12	12	12	1	12	1919	1908	0
Serum_replicated	tRF-16-F1R3WEE	16	PREDICTED: Homo sapiens uncharacterized LOC124900933 (LOC124900933), ncRNA	XR_007058678	1684	12	12	12	1	12	1588	1577	0
Serum_replicated	tRF-16-F1R3WEE	16	PREDICTED: Homo sapiens calcium sensing receptor (CASR), transcript variant X4, mRNA	XM_047449065	9813	12	12	12	1	12	4457	4468	0
Serum_replicated	tRF-16-F1R3WEE	16	PREDICTED: Homo sapiens calcium sensing receptor (CASR), transcript variant X3, mRNA	XM_017007325	10019	12	12	12	1	12	4663	4674	0
Serum_replicated	tRF-16-F1R3WEE	16	PREDICTED: Homo sapiens calcium sensing receptor (CASR), transcript variant X2, mRNA	XM_017007324	11994	12	12	12	1	12	6638	6649	0
Serum_replicated	tRF-16-F1R3WEE	16	PREDICTED: Homo sapiens calcium sensing receptor (CASR), transcript variant X1, mRNA	XM_006713789	10120	12	12	12	1	12	4764	4775	0
Serum_replicated	tRF-16-F1R3WEE	16	PREDICTED: Homo sapiens serpin family H member 1 (SERPINH1), transcript variant X3, mRNA	XM_011545327	2161	12	12	12	1	12	1588	1599	0
Serum_replicated	tRF-16-F1R3WEE	16	PREDICTED: Homo sapiens serpin family H member 1 (SERPINH1), transcript variant X2, mRNA	XM_024448756	2447	12	12	12	1	12	1874	1885	0
Serum_replicated	tRF-16-F1R3WEE	16	PREDICTED: Homo sapiens serpin family H member 1 (SERPINH1), transcript variant X1, mRNA	XM_047427800	2579	12	12	12	1	12	2006	2017	0
Serum_replicated	tRF-16-F1R3WEE	16	PREDICTED: Homo sapiens TNF superfamily member 4 (TNFSF4), transcript variant X2, mRNA	XM_047429896	11791	12	12	12	1	12	5019	5030	0
Serum_replicated	tRF-16-F1R3WEE	16	PREDICTED: Homo sapiens interferon lambda receptor 1 (IFNLR1), transcript variant X2, mRNA	XM_017000479	4579	12	12	12	1	12	2217	2228	0
Serum_replicated	tRF-16-F1R3WEE	16	PREDICTED: Homo sapiens interferon lambda receptor 1 (IFNLR1), transcript variant X1, mRNA	XM_006710394	4616	12	12	12	1	12	2254	2265	0
Serum_replicated	tRF-16-F1R3WEE	16	Homo sapiens isolate HbnC4t1p1 clone A1_pc-1 immunoglobulin kappa chain variable region mRNA, partial cds	OM631405	321	12	12	12	1	12	164	175	0
Serum_replicated	tRF-16-F1R3WEE	16	Homo sapiens isolate NA24385 chromosome Y	CP086569	62460029	12	12	12	5	16	3619943	3619954	0
Serum_replicated	tRF-16-F1R3WEE	16	Homo sapiens isolate COV2-vax-42 immunoglobulin heavy chain mRNA, partial cds	MZ555510	352	12	12	12	1	12	340	329	0
Serum_replicated	tRF-16-F1R3WEE	16	Homo sapiens isolate CHM13 chromosome 22	CP068256	51324926	12	12	12	1	12	43728267	43728256	0
Serum_replicated	tRF-16-F1R3WEE	16	Homo sapiens isolate CHM13 chromosome 22	CP068256	51324926	12	12	12	1	12	50208916	50208927	0
Serum_replicated	tRF-16-F1R3WEE	16	Homo sapiens isolate CHM13 chromosome 20	CP068258	66210255	12	12	12	1	12	34942570	34942559	0
Serum_replicated	tRF-16-F1R3WEE	16	Homo sapiens isolate CHM13 chromosome 20	CP068258	66210255	12	12	12	1	12	46044272	46044283	0
Serum_replicated	tRF-16-F1R3WEE	16	Homo sapiens isolate CHM13 chromosome 16	CP068262	96330374	12	12	12	2	13	518567	518578	0
Serum_replicated	tRF-16-F1R3WEE	16	Homo sapiens isolate CHM13 chromosome 16	CP068262	96330374	12	12	12	2	13	518690	518701	0
Serum_replicated	tRF-16-F1R3WEE	16	Homo sapiens isolate CHM13 chromosome 16	CP068262	96330374	12	12	12	1	12	15441851	15441840	0
Serum_replicated	tRF-16-F1R3WEE	16	Homo sapiens isolate CHM13 chromosome 16	CP068262	96330374	12	12	12	1	12	16042629	16042640	0
Serum_replicated	tRF-16-F1R3WEE	16	Homo sapiens isolate CHM13 chromosome 16	CP068262	96330374	12	12	12	1	12	17258365	17258376	0
Serum_replicated	tRF-16-F1R3WEE	16	Homo sapiens isolate CHM13 chromosome 16	CP068262	96330374	12	12	12	1	12	94720894	94720883	0
Serum_replicated	tRF-16-F1R3WEE	16	Homo sapiens DNA, chromosome 22, nearly complete genome	AP023482	46684173	12	12	12	1	12	39095390	39095379	0
Serum_replicated	tRF-16-F1R3WEE	16	Homo sapiens DNA, chromosome 22, nearly complete genome	AP023482	46684173	12	12	12	1	12	45580317	45580328	0
Serum_replicated	tRF-16-F1R3WEE	16	Homo sapiens DNA, chromosome 16, nearly complete genome	AP023476	94690957	12	12	12	2	13	504994	505005	0
Serum_replicated	tRF-16-F1R3WEE	16	Homo sapiens DNA, chromosome 16, nearly complete genome	AP023476	94690957	12	12	12	2	13	505117	505128	0
Serum_replicated	tRF-16-F1R3WEE	16	Homo sapiens DNA, chromosome 16, nearly complete genome	AP023476	94690957	12	12	12	1	12	14969712	14969701	0
Serum_replicated	tRF-16-F1R3WEE	16	Homo sapiens DNA, chromosome 16, nearly complete genome	AP023476	94690957	12	12	12	1	12	15570873	15570884	0
Serum_replicated	tRF-16-F1R3WEE	16	Homo sapiens DNA, chromosome 16, nearly complete genome	AP023476	94690957	12	12	12	1	12	16450525	16450536	0
Serum_replicated	tRF-16-F1R3WEE	16	Homo sapiens DNA, chromosome 16, nearly complete genome	AP023476	94690957	12	12	12	1	12	93192514	93192503	0
Serum_replicated	tRF-16-F1R3WEE	16	Homo sapiens DNA, chromosome 15, nearly complete genome	AP023475	95537968	12	12	12	3	14	34834995	34835006	0
Serum_replicated	tRF-16-F1R3WEE	16	Homo sapiens DNA, chromosome 15, nearly complete genome	AP023475	95537968	12	12	12	1	12	63733699	63733710	0
Serum_replicated	tRF-16-F1R3WEE	16	Homo sapiens DNA, chromosome 15, nearly complete genome	AP023475	95537968	12	12	12	1	12	64225684	64225673	0
Serum_replicated	tRF-16-F1R3WEE	16	Homo sapiens DNA, chromosome 15, nearly complete genome	AP023475	95537968	12	12	12	1	12	67605374	67605385	0
Serum_replicated	tRF-16-F1R3WEE	16	Homo sapiens DNA, chromosome 15, nearly complete genome	AP023475	95537968	12	12	12	1	12	72403002	72403013	0
Serum_replicated	tRF-16-F1R3WEE	16	Homo sapiens DNA, chromosome 15, nearly complete genome	AP023475	95537968	12	12	12	1	12	80432743	80432754	0
Serum_replicated	tRF-18-F8DHXYD9	18	Homo sapiens LHRI_LNC718.1 lncRNA gene, complete sequence	MN296879	240	18	18	18	1	18	5	22	0
Serum_replicated	tRF-18-F8DHXYD9	18	Homo sapiens LHRI_LNC2170.1 lncRNA, complete sequence	MW804146	508	18	18	18	1	18	12	29	0
Serum_replicated	tRF-18-F8DHXYD9	18	Homo sapiens LHRI_LNC2366.1 lncRNA, complete sequence	MW803861	203	18	18	18	1	18	14	31	0
Serum_replicated	tRF-18-F8DHXYD9	18	TPA: Homo sapiens tRNA-iMet-CAT-2-1 gene	HG984144	72	18	18	18	1	18	14	31	0
Serum_replicated	tRF-18-F8DHXYD9	18	TPA: Homo sapiens tRNA-iMet-CAT-1-1 gene >gi|634722582|tpe|HG984137.1| TPA: Homo sapiens tRNA-iMet-CAT-1-8 gene >gi|634722583|tpe|HG984138.1| TPA: Homo sapiens tRNA-iMet-CAT-1-2 gene >gi|634722585|tpe|HG984139.1| TPA: Homo sapiens tRNA-iMet-CAT-1-3 gene >gi|634722586|tpe|HG984140.1| TPA: Homo sapiens tRNA-iMet-CAT-1-4 gene >gi|634722588|tpe|HG984141.1| TPA: Homo sapiens tRNA-iMet-CAT-1-5 gene >gi…	HG984136	72	18	18	18	1	18	14	31	0
Serum_replicated	tRF-18-F8DHXYD9	18	TPA: Homo sapiens tRNA-Thr-CGT-6-1 gene	HG984057	72	18	18	18	1	18	14	31	0
Serum_replicated	tRF-18-F8DHXYD9	18	Chain j, initiator Met-RNA-i >gi|2231579900|pdb|7TQL|3 Chain 3, Human Met-tRNAiMet	4KZZ_j	75	18	18	18	1	18	14	31	0
Serum_replicated	tRF-18-F8DHXYD9	18	Chain 1, tRNA >gi|1938876689|pdb|7A09|f Chain f, tRNA	6ZP4_1	75	18	18	18	1	18	14	31	0
Serum_replicated	tRF-18-F8DHXYD9	18	Homo sapiens piRNA piR-35952, complete sequence	DQ597886	32	18	18	18	1	18	14	31	0
Serum_replicated	tRF-18-F8DHXYD9	18	Homo sapiens piRNA piR-35229, complete sequence	DQ597163	29	18	18	18	1	18	11	28	0
Serum_replicated	tRF-18-F8DHXYD9	18	Homo sapiens piRNA piR-35176, complete sequence	DQ597110	32	18	18	18	1	18	13	30	0
Serum_replicated	tRF-18-F8DHXYD9	18	Homo sapiens piRNA piR-33387, complete sequence	DQ593275	32	18	18	18	1	18	14	31	0
Serum_replicated	tRF-18-F8DHXYD9	18	Homo sapiens piRNA piR-32374, complete sequence	DQ582262	31	18	18	18	1	18	12	29	0
Serum_replicated	tRF-18-F8DHXYD9	18	Homo sapiens piRNA piR-30961, complete sequence	DQ570849	31	18	18	18	1	18	11	28	0
Serum_replicated	tRF-18-F8DHXYD9	18	Human DNA sequence from clone RP11-354A16 on chromosome 1, complete sequence	AL713889	54184	18	18	18	1	18	7875	7892	0
Serum_replicated	tRF-18-F8DHXYD9	18	Human DNA sequence from clone RP1-45P21 on chromosome 6p21.3-22.2, complete sequence	AL021917	170001	18	18	18	1	18	2720	2737	0
Serum_replicated	tRF-18-F8DHXYD9	18	Human DNA sequence from clone RP1-45P21 on chromosome 6p21.3-22.2, complete sequence	AL021917	170001	18	18	18	1	18	29363	29346	0
Serum_replicated	tRF-18-F8DHXYD9	18	Human DNA sequence from clone RP1-45P21 on chromosome 6p21.3-22.2, complete sequence	AL021917	170001	18	18	18	1	18	46540	46523	0
Serum_replicated	tRF-18-F8DHXYD9	18	Human DNA sequence from clone RP1-97D16 on chromosome 6p21.3-22.2, complete sequence	AL009179	139904	18	18	18	1	18	106050	106067	0
Serum_replicated	tRF-18-F8DHXYD9	18	H.sapiens tRNA-Met gene	Z69292	825	18	18	18	1	18	330	347	0
Serum_replicated	tRF-18-F8DHXYD9	18	Human initiator Met-tRNA mutant T54	M10957	141	18	18	18	1	18	44	61	0
Serum_replicated	tRF-18-F8DHXYD9	18	Human met-tRNA-i gene 2 (clone lambda-htm2)	J00311	270	18	18	18	1	18	137	154	0
Serum_replicated	tRF-18-F8DHXYD9	18	Human Met-tRNA-i gene 1	J00310	270	18	18	18	1	18	137	154	0
Serum_replicated	tRF-18-F8DHXYD9	18	Human initiator Met-tRNA-i >gi|175421|gb|K00329.1|MUSTRMI Mouse initiator Met-tRNA-i >gi|175569|gb|K00327.1|ONHTRMI Salmon initiator Met-tRNA-i >gi|176348|gb|K00330.1|XELTRMI X.laevis initiator Met-tRNA-i >gi|1048348538|pdb|5K0Y|N Chain N, tRNA >gi|1890516849|pdb|6FEC|N Chain N, Transfer RNA (75-MER) >gi|1938947666|pdb|6YBV|w Chain w, Initiator methionine tRNA >gi|1938954186|pdb|6ZMW|w Chain w, I…	K00328	75	18	18	18	1	18	14	31	0
Serum_replicated	tRF-18-F8DHXYD9	18	Homo sapiens CRISPRi-validated cis-regulatory element chr6.1315 (LOC116183052) on chromosome 6	NG_066782	1273	18	18	18	1	18	322	305	0
Serum_replicated	tRF-18-F8DHXYD9	18	Homo sapiens Sharpr-MPRA regulatory region 6095 (LOC123620075) on chromosome 6	NG_077957	495	18	18	18	1	18	390	373	0
Serum_replicated	tRF-18-F8DHXYD9	18	Homo sapiens isolate CHM13 chromosome 17	CP068261	84276897	18	18	18	1	18	83363702	83363685	0
Serum_replicated	tRF-18-F8DHXYD9	18	Homo sapiens isolate CHM13 chromosome 17	CP068261	84276897	13	13	13	5	17	32542390	32542378	0
Serum_replicated	tRF-18-F8DHXYD9	18	Homo sapiens isolate CHM13 chromosome 17	CP068261	84276897	13	13	13	5	17	45784895	45784907	0
Serum_replicated	tRF-18-F8DHXYD9	18	Homo sapiens isolate CHM13 chromosome 17	CP068261	84276897	13	13	13	6	18	67834074	67834086	0
Serum_replicated	tRF-18-F8DHXYD9	18	Homo sapiens isolate CHM13 chromosome 17	CP068261	84276897	12	12	12	7	18	8009586	8009597	0
Serum_replicated	tRF-18-F8DHXYD9	18	Homo sapiens isolate CHM13 chromosome 17	CP068261	84276897	12	12	12	7	18	21654684	21654695	0
Serum_replicated	tRF-18-F8DHXYD9	18	Homo sapiens isolate CHM13 chromosome 17	CP068261	84276897	12	12	12	3	14	36702670	36702681	0
Serum_replicated	tRF-18-F8DHXYD9	18	Homo sapiens isolate CHM13 chromosome 17	CP068261	84276897	12	12	12	4	15	46121572	46121583	0
Serum_replicated	tRF-18-F8DHXYD9	18	Homo sapiens isolate CHM13 chromosome 17	CP068261	84276897	12	12	12	7	18	67362667	67362678	0
Serum_replicated	tRF-18-F8DHXYD9	18	Homo sapiens isolate CHM13 chromosome 17	CP068261	84276897	12	12	12	6	17	75782544	75782555	0
Serum_replicated	tRF-18-F8DHXYD9	18	Homo sapiens isolate CHM13 chromosome 17	CP068261	84276897	12	12	12	7	18	84090500	84090511	0
Serum_replicated	tRF-18-F8DHXYD9	18	Homo sapiens isolate CHM13 chromosome 17	CP068261	84276897	12	12	12	7	18	6357697	6357686	0
Serum_replicated	tRF-18-F8DHXYD9	18	Homo sapiens isolate CHM13 chromosome 17	CP068261	84276897	12	12	12	4	15	10706113	10706102	0
Serum_replicated	tRF-18-F8DHXYD9	18	Homo sapiens isolate CHM13 chromosome 17	CP068261	84276897	12	12	12	7	18	17685529	17685518	0
Serum_replicated	tRF-18-F8DHXYD9	18	Homo sapiens isolate CHM13 chromosome 17	CP068261	84276897	12	12	12	6	17	32008323	32008312	0
Serum_replicated	tRF-18-F8DHXYD9	18	Homo sapiens isolate CHM13 chromosome 17	CP068261	84276897	12	12	12	4	15	33433269	33433258	0
Serum_replicated	tRF-18-F8DHXYD9	18	Homo sapiens isolate CHM13 chromosome 17	CP068261	84276897	12	12	12	7	18	45167133	45167122	0
Serum_replicated	tRF-18-F8DHXYD9	18	Homo sapiens isolate CHM13 chromosome 17	CP068261	84276897	12	12	12	6	17	67156435	67156424	0
Serum_replicated	tRF-18-F8DHXYD9	18	Homo sapiens isolate CHM13 chromosome 17	CP068261	84276897	15	15	12	3	18	82251669	82251654	0
Serum_replicated	tRF-18-F8DHXYD9	18	Homo sapiens DNA, chromosome 17, nearly complete genome	AP023477	80688777	18	18	18	1	18	79951674	79951657	0
Serum_replicated	tRF-18-F8DHXYD9	18	Homo sapiens DNA, chromosome 17, nearly complete genome	AP023477	80688777	13	13	13	5	17	29680594	29680582	0
Serum_replicated	tRF-18-F8DHXYD9	18	Homo sapiens DNA, chromosome 17, nearly complete genome	AP023477	80688777	13	13	13	5	17	42628406	42628418	0
Serum_replicated	tRF-18-F8DHXYD9	18	Homo sapiens DNA, chromosome 17, nearly complete genome	AP023477	80688777	13	13	13	6	18	64434135	64434147	0
Serum_replicated	tRF-18-F8DHXYD9	18	Homo sapiens DNA, chromosome 17, nearly complete genome	AP023477	80688777	12	12	12	7	18	8186535	8186546	0
Serum_replicated	tRF-18-F8DHXYD9	18	Homo sapiens DNA, chromosome 17, nearly complete genome	AP023477	80688777	12	12	12	3	14	33839183	33839194	0
Serum_replicated	tRF-18-F8DHXYD9	18	Homo sapiens DNA, chromosome 17, nearly complete genome	AP023477	80688777	12	12	12	4	15	42964515	42964526	0
Serum_replicated	tRF-18-F8DHXYD9	18	Homo sapiens DNA, chromosome 17, nearly complete genome	AP023477	80688777	12	12	12	7	18	63962581	63962592	0
Serum_replicated	tRF-18-F8DHXYD9	18	Homo sapiens DNA, chromosome 17, nearly complete genome	AP023477	80688777	12	12	12	6	17	72377063	72377074	0
Serum_replicated	tRF-18-F8DHXYD9	18	Homo sapiens DNA, chromosome 17, nearly complete genome	AP023477	80688777	12	12	12	7	18	80528710	80528721	0
Serum_replicated	tRF-18-F8DHXYD9	18	Homo sapiens DNA, chromosome 17, nearly complete genome	AP023477	80688777	12	12	12	7	18	6536026	6536015	0
Serum_replicated	tRF-18-F8DHXYD9	18	Homo sapiens DNA, chromosome 17, nearly complete genome	AP023477	80688777	12	12	12	4	15	10885949	10885938	0
Serum_replicated	tRF-18-F8DHXYD9	18	Homo sapiens DNA, chromosome 17, nearly complete genome	AP023477	80688777	12	12	12	7	18	17819606	17819595	0
Serum_replicated	tRF-18-F8DHXYD9	18	Homo sapiens DNA, chromosome 17, nearly complete genome	AP023477	80688777	12	12	12	6	17	29146972	29146961	0
Serum_replicated	tRF-18-F8DHXYD9	18	Homo sapiens DNA, chromosome 17, nearly complete genome	AP023477	80688777	12	12	12	4	15	30571195	30571184	0
Serum_replicated	tRF-18-F8DHXYD9	18	Homo sapiens DNA, chromosome 17, nearly complete genome	AP023477	80688777	12	12	12	7	18	42010529	42010518	0
Serum_replicated	tRF-18-F8DHXYD9	18	Homo sapiens DNA, chromosome 17, nearly complete genome	AP023477	80688777	15	15	12	3	18	78843889	78843874	0
Serum_replicated	tRF-18-F8DHXYD9	18	Human DNA sequence from clone RP1-193B12 on chromosome 6p21.3-22.3, complete sequence	Z98744	100374	18	18	18	1	18	66292	66275	0
Serum_replicated	tRF-18-F8DHXYD9	18	Human DNA sequence from clone SCb-24o18 on chromosome 6p21.31-22.2, complete sequence	AL021808	154066	18	18	18	1	18	89075	89058	0
Serum_replicated	tRF-18-F8DHXYD9	18	Human DNA sequence from clone SCb-24o18 on chromosome 6p21.31-22.2, complete sequence	AL021808	154066	18	18	18	1	18	118271	118254	0
Serum_replicated	tRF-18-F8DHXYD9	18	Human DNA sequence from clone SCb-34I8 on chromosome 6p21.3-22.1, complete sequence	AL021918	159506	18	18	18	1	18	141787	141770	0
Serum_replicated	tRF-18-F8DHXYD9	18	Homo sapiens chromosome 17, clone RP13-991F5, complete sequence	AC124287	162180	18	18	18	1	18	117356	117339	0
Serum_replicated	tRF-18-F8DHXYD9	18	Homo sapiens piRNA piR-35175, complete sequence	DQ597109	28	16	16	16	1	16	13	28	0
Serum_replicated	tRF-18-F8DHXYD9	18	Homo sapiens piRNA piR-33437, complete sequence	DQ593325	28	16	16	16	3	18	1	16	0
Serum_replicated	tRF-18-F8DHXYD9	18	Homo sapiens piRNA piR-50725, complete sequence	DQ583613	29	16	16	16	1	16	14	29	0
Serum_replicated	tRF-18-F8DHXYD9	18	Homo sapiens chromosome 22 clone CH17-334E21, complete sequence	AC277972	217465	15	15	15	2	16	82134	82148	0
Serum_replicated	tRF-18-F8DHXYD9	18	Homo sapiens MED14-independent group 3 enhancer GRCh37_chr8:145926819-145928018 (LOC126860551) on chromosome 8	NG_085051	1400	15	15	15	3	17	48	62	0
Serum_replicated	tRF-18-F8DHXYD9	18	Homo sapiens clone BMMD-CH17_116O7, complete sequence	KJ155477	213031	15	15	15	2	16	39205	39219	0
Serum_replicated	tRF-18-F8DHXYD9	18	Homo sapiens clone BMMD-CH17_116O7, complete sequence	KJ155477	213031	12	12	12	5	16	127860	127871	0
Serum_replicated	tRF-18-F8DHXYD9	18	Homo sapiens clone BMMD-RP13_49D18, complete sequence	KJ155472	195344	15	15	15	2	16	136791	136805	0
Serum_replicated	tRF-18-F8DHXYD9	18	Homo sapiens clone ABC9_3_5_000046294200_J1 chromosome 22 sequence, complete sequence	OL310227	41724	15	15	15	2	16	1133	1147	0
Serum_replicated	tRF-18-F8DHXYD9	18	Homo sapiens isolate CHM13 chromosome 22	CP068256	51324926	15	15	15	2	16	18950700	18950714	0
Serum_replicated	tRF-18-F8DHXYD9	18	Homo sapiens isolate CHM13 chromosome 22	CP068256	51324926	15	15	15	2	16	23064720	23064734	0
Serum_replicated	tRF-18-F8DHXYD9	18	Homo sapiens isolate CHM13 chromosome 22	CP068256	51324926	15	15	15	2	16	25118151	25118165	0
Serum_replicated	tRF-18-F8DHXYD9	18	Homo sapiens isolate CHM13 chromosome 22	CP068256	51324926	15	15	15	2	16	21100810	21100796	0
Serum_replicated	tRF-18-F8DHXYD9	18	Homo sapiens isolate CHM13 chromosome 22	CP068256	51324926	15	15	15	2	16	24715678	24715664	0
Serum_replicated	tRF-18-F8DHXYD9	18	Homo sapiens isolate CHM13 chromosome 22	CP068256	51324926	14	14	14	3	16	21534346	21534359	0
Serum_replicated	tRF-18-F8DHXYD9	18	Homo sapiens isolate CHM13 chromosome 22	CP068256	51324926	13	13	13	5	17	27813406	27813394	0
Serum_replicated	tRF-18-F8DHXYD9	18	Homo sapiens isolate CHM13 chromosome 22	CP068256	51324926	12	12	12	5	16	19039564	19039575	0
Serum_replicated	tRF-18-F8DHXYD9	18	Homo sapiens isolate CHM13 chromosome 22	CP068256	51324926	15	15	12	3	18	43331058	43331073	0
Serum_replicated	tRF-18-F8DHXYD9	18	Homo sapiens isolate CHM13 chromosome 22	CP068256	51324926	12	12	12	7	18	47536702	47536713	0
Serum_replicated	tRF-18-F8DHXYD9	18	Homo sapiens isolate CHM13 chromosome 22	CP068256	51324926	12	12	12	7	18	50969320	50969331	0
Serum_replicated	tRF-18-F8DHXYD9	18	Homo sapiens isolate CHM13 chromosome 22	CP068256	51324926	12	12	12	5	16	19135209	19135198	0
Serum_replicated	tRF-18-F8DHXYD9	18	Homo sapiens isolate CHM13 chromosome 22	CP068256	51324926	12	12	12	5	16	21605877	21605866	0
Serum_replicated	tRF-18-F8DHXYD9	18	Homo sapiens isolate CHM13 chromosome 22	CP068256	51324926	12	12	12	2	13	22449517	22449506	0
Serum_replicated	tRF-18-F8DHXYD9	18	Homo sapiens isolate CHM13 chromosome 22	CP068256	51324926	12	12	12	7	18	38756664	38756653	0
Serum_replicated	tRF-18-F8DHXYD9	18	Homo sapiens isolate CHM13 chromosome 22	CP068256	51324926	12	12	12	6	17	40871549	40871538	0
Serum_replicated	tRF-18-F8DHXYD9	18	Homo sapiens isolate CHM13 chromosome 22	CP068256	51324926	12	12	12	7	18	44359908	44359897	0
Serum_replicated	tRF-18-F8DHXYD9	18	Homo sapiens isolate CHM13 chromosome 22	CP068256	51324926	12	12	12	7	18	45986253	45986242	0
Serum_replicated	tRF-18-F8DHXYD9	18	Chain C, E-tRNA	3J3D_C	75	17	17	15	1	18	14	31	0
Serum_replicated	tRF-18-F8DHXYD9	18	Homo sapiens DNA, chromosome 22, nearly complete genome	AP023482	46684173	15	15	15	2	16	18308494	18308508	0
Serum_replicated	tRF-18-F8DHXYD9	18	Homo sapiens DNA, chromosome 22, nearly complete genome	AP023482	46684173	15	15	15	2	16	20391432	20391446	0
Serum_replicated	tRF-18-F8DHXYD9	18	Homo sapiens DNA, chromosome 22, nearly complete genome	AP023482	46684173	15	15	15	2	16	16665378	16665364	0
Serum_replicated	tRF-18-F8DHXYD9	18	Homo sapiens DNA, chromosome 22, nearly complete genome	AP023482	46684173	15	15	15	2	16	19970677	19970663	0
Serum_replicated	tRF-18-F8DHXYD9	18	Homo sapiens DNA, chromosome 22, nearly complete genome	AP023482	46684173	13	13	13	5	17	23085888	23085876	0
Serum_replicated	tRF-18-F8DHXYD9	18	Homo sapiens DNA, chromosome 22, nearly complete genome	AP023482	46684173	15	15	12	3	18	38627143	38627158	0
Serum_replicated	tRF-18-F8DHXYD9	18	Homo sapiens DNA, chromosome 22, nearly complete genome	AP023482	46684173	12	12	12	7	18	42902579	42902590	0
Serum_replicated	tRF-18-F8DHXYD9	18	Homo sapiens DNA, chromosome 22, nearly complete genome	AP023482	46684173	12	12	12	7	18	46337281	46337292	0
Serum_replicated	tRF-18-F8DHXYD9	18	Homo sapiens DNA, chromosome 22, nearly complete genome	AP023482	46684173	12	12	12	2	13	17702538	17702527	0
Serum_replicated	tRF-18-F8DHXYD9	18	Homo sapiens DNA, chromosome 22, nearly complete genome	AP023482	46684173	12	12	12	7	18	34036681	34036670	0
Serum_replicated	tRF-18-F8DHXYD9	18	Homo sapiens DNA, chromosome 22, nearly complete genome	AP023482	46684173	12	12	12	6	17	36146995	36146984	0
Serum_replicated	tRF-18-F8DHXYD9	18	Homo sapiens DNA, chromosome 22, nearly complete genome	AP023482	46684173	12	12	12	7	18	39727848	39727837	0
Serum_replicated	tRF-18-F8DHXYD9	18	Homo sapiens DNA, chromosome 22, nearly complete genome	AP023482	46684173	12	12	12	7	18	41351329	41351318	0
Serum_replicated	tRF-18-F8DHXYD9	18	Homo sapiens chromosome unknown clone VMRC59-305D15, complete sequence	AC279656	166831	15	15	15	2	16	26840	26854	0
Serum_replicated	tRF-18-F8DHXYD9	18	Homo sapiens chromosome unknown clone VMRC59-305D15, complete sequence	AC279656	166831	12	12	12	5	16	115705	115716	0
Serum_replicated	tRF-18-F8DHXYD9	18	Homo sapiens BAC clone CH17-420I24 from chromosome 22, complete sequence	AC244250	210075	15	15	15	2	16	92760	92774	0
Serum_replicated	tRF-18-F8DHXYD9	18	Homo sapiens FOSMID clone ABC12-49077700J21 from chromosome 22, complete sequence	AC242391	38680	15	15	15	2	16	9328	9342	0
Serum_replicated	tRF-18-F8DHXYD9	18	Homo sapiens immunoglobulin lambda locus (IGL) on chromosome 22	NG_000002	909203	15	15	15	2	16	608478	608492	0
Serum_replicated	tRF-18-F8DHXYD9	18	Homo sapiens immunoglobulin lambda locus (IGL) on chromosome 22	NG_000002	909203	12	12	12	2	13	14352	14341	0
Serum_replicated	tRF-18-F8DHXYD9	18	Homo sapiens piRNA piR-35174, complete sequence	DQ597108	27	15	15	15	1	15	13	27	0
Serum_replicated	tRF-18-F8DHXYD9	18	Homo sapiens chromosome 8 multiple clones map q24.3, complete sequence	AF235103	345524	15	15	15	3	17	4345	4359	0
Serum_replicated	tRF-18-F8DHXYD9	18	Homo sapiens chromosome 8 clone XX-P7B3, RP4-698E23 map qtel, complete sequence	AF186192	145247	15	15	15	3	17	88867	88881	0
Serum_replicated	tRF-18-F8DHXYD9	18	Homo sapiens chromosome 22 clone b659m11 map 22q11, complete sequence	AC023491	150754	15	15	15	2	16	10510	10524	0
Serum_replicated	tRF-18-F8DHXYD9	18	Homo sapiens chromosome 22 clone b659m11 map 22q11, complete sequence	AC023491	150754	12	12	12	5	16	98834	98845	0
Serum_replicated	tRF-18-F8DHXYD9	18	Homo sapiens clone b2262a2, complete sequence	AC012330	105288	15	15	15	2	16	16706	16720	0
Serum_replicated	tRF-18-F8DHXYD9	18	Homo sapiens clone b2262a2, complete sequence	AC012330	105288	12	12	12	5	16	104059	104070	0
Serum_replicated	tRF-18-F8DHXYD9	18	Homo sapiens chromosome 22 clone b293 map 22q11, complete sequence	AC007324	122364	15	15	15	2	16	107150	107164	0
Serum_replicated	tRF-18-F8DHXYD9	18	Homo sapiens Chromosome 22q11.2 Cosmid Clone 31f3 In IGLC Region, complete sequence	AC000051	35687	15	15	15	2	16	15874	15888	0
Serum_replicated	tRF-18-F8DHXYD9	18	Homo sapiens Chromosome 22q11.2 BAC Clone 1000e4 In IGLC Region, complete sequence	AC002308	151111	15	15	15	2	16	41174	41188	0
Serum_replicated	tRF-18-F8DHXYD9	18	Homo sapiens genomic DNA, chromosome 11 clone:RP11-410I24, complete sequence	AP003050	152715	15	15	15	4	18	30701	30715	0
Serum_replicated	tRF-18-F8DHXYD9	18	Homo sapiens genomic sequence surrounding NotI site, clone NR5-HG5C	AJ327634	653	15	15	15	3	17	455	469	0
Serum_replicated	tRF-18-F8DHXYD9	18	Homo sapiens genomic DNA, chromosome 22q11.2, clone KB1995A5	AP000356	163795	15	15	15	2	16	148999	149013	0
Serum_replicated	tRF-18-F8DHXYD9	18	Homo sapiens immunoglobulin lambda gene locus DNA, clone:31F3	D87002	36742	15	15	15	2	16	16926	16940	0
Serum_replicated	tRF-18-F8DHXYD9	18	Homo sapiens chromosome 16 clone CH17-225P23, complete sequence	AC277949	211301	15	15	15	4	18	31186	31172	0
Serum_replicated	tRF-18-F8DHXYD9	18	Homo sapiens chromosome 22 clone CH17-291K13, complete sequence	AC277824	205795	15	15	15	2	16	126693	126679	0
Serum_replicated	tRF-18-F8DHXYD9	18	Homo sapiens chromosome 22 clone CH17-291K13, complete sequence	AC277824	205795	12	12	12	5	16	37847	37836	0
Serum_replicated	tRF-18-F8DHXYD9	18	Homo sapiens BAC clone CH17-409N24 from chromosome 22, complete sequence	AC270110	197504	15	15	15	2	16	58511	58497	0
Serum_replicated	tRF-18-F8DHXYD9	18	Homo sapiens H3K27ac-H3K4me1 hESC enhancer GRCh37_chr16:2743320-2744137 (LOC127882822) on chromosome 16	NG_132788	1018	15	15	15	4	18	471	457	0
Serum_replicated	tRF-18-F8DHXYD9	18	Homo sapiens isolate CHM13 chromosome 20	CP068258	66210255	15	15	15	2	16	24052555	24052541	0
Serum_replicated	tRF-18-F8DHXYD9	18	Homo sapiens isolate CHM13 chromosome 20	CP068258	66210255	15	15	15	4	18	65623815	65623801	0
Serum_replicated	tRF-18-F8DHXYD9	18	Homo sapiens isolate CHM13 chromosome 20	CP068258	66210255	13	13	13	4	16	19366318	19366306	0
Serum_replicated	tRF-18-F8DHXYD9	18	Homo sapiens isolate CHM13 chromosome 20	CP068258	66210255	12	12	12	7	18	30036533	30036544	0
Serum_replicated	tRF-18-F8DHXYD9	18	Homo sapiens isolate CHM13 chromosome 20	CP068258	66210255	12	12	12	6	17	54951053	54951064	0
Serum_replicated	tRF-18-F8DHXYD9	18	Homo sapiens isolate CHM13 chromosome 20	CP068258	66210255	12	12	12	4	15	58492062	58492073	0
Serum_replicated	tRF-18-F8DHXYD9	18	Homo sapiens isolate CHM13 chromosome 20	CP068258	66210255	12	12	12	4	15	64838638	64838649	0
Serum_replicated	tRF-18-F8DHXYD9	18	Homo sapiens isolate CHM13 chromosome 20	CP068258	66210255	12	12	12	4	15	64838688	64838699	0
Serum_replicated	tRF-18-F8DHXYD9	18	Homo sapiens isolate CHM13 chromosome 20	CP068258	66210255	12	12	12	2	13	24114516	24114505	0
Serum_replicated	tRF-18-F8DHXYD9	18	Homo sapiens isolate CHM13 chromosome 20	CP068258	66210255	12	12	12	4	15	35537557	35537546	0
Serum_replicated	tRF-18-F8DHXYD9	18	Homo sapiens isolate CHM13 chromosome 20	CP068258	66210255	12	12	12	5	16	35985834	35985823	0
Serum_replicated	tRF-18-F8DHXYD9	18	Homo sapiens isolate CHM13 chromosome 20	CP068258	66210255	12	12	12	5	16	53122084	53122073	0
Serum_replicated	tRF-18-F8DHXYD9	18	Homo sapiens isolate CHM13 chromosome 20	CP068258	66210255	15	15	12	3	18	60360181	60360166	0
Serum_replicated	tRF-18-F8DHXYD9	18	Homo sapiens isolate CHM13 chromosome 20	CP068258	66210255	12	12	12	7	18	63767195	63767184	0
Serum_replicated	tRF-18-F8DHXYD9	18	Homo sapiens isolate CHM13 chromosome 20	CP068258	66210255	12	12	12	7	18	64282552	64282541	0
Serum_replicated	tRF-18-F8DHXYD9	18	Homo sapiens isolate CHM13 chromosome 20	CP068258	66210255	12	12	12	7	18	65458776	65458765	0
Serum_replicated	tRF-18-F8DHXYD9	18	Homo sapiens isolate CHM13 chromosome 16	CP068262	96330374	15	15	15	4	18	2713904	2713890	0
Serum_replicated	tRF-18-F8DHXYD9	18	Homo sapiens isolate CHM13 chromosome 16	CP068262	96330374	13	13	13	6	18	186158	186146	0
Serum_replicated	tRF-18-F8DHXYD9	18	Homo sapiens isolate CHM13 chromosome 16	CP068262	96330374	12	12	12	4	15	10704801	10704812	0
Serum_replicated	tRF-18-F8DHXYD9	18	Homo sapiens isolate CHM13 chromosome 16	CP068262	96330374	12	12	12	4	15	12688085	12688096	0
Serum_replicated	tRF-18-F8DHXYD9	18	Homo sapiens isolate CHM13 chromosome 16	CP068262	96330374	12	12	12	2	13	16675383	16675394	0
Serum_replicated	tRF-18-F8DHXYD9	18	Homo sapiens isolate CHM13 chromosome 16	CP068262	96330374	12	12	12	7	18	19996047	19996058	0
Serum_replicated	tRF-18-F8DHXYD9	18	Homo sapiens isolate CHM13 chromosome 16	CP068262	96330374	12	12	12	4	15	27834973	27834984	0
Serum_replicated	tRF-18-F8DHXYD9	18	Homo sapiens isolate CHM13 chromosome 16	CP068262	96330374	12	12	12	4	15	30399341	30399352	0
Serum_replicated	tRF-18-F8DHXYD9	18	Homo sapiens isolate CHM13 chromosome 16	CP068262	96330374	12	12	12	4	15	91482982	91482993	0
Serum_replicated	tRF-18-F8DHXYD9	18	Homo sapiens isolate CHM13 chromosome 16	CP068262	96330374	12	12	12	5	16	91981888	91981899	0
Serum_replicated	tRF-18-F8DHXYD9	18	Homo sapiens isolate CHM13 chromosome 16	CP068262	96330374	12	12	12	4	15	92587985	92587996	0
Serum_replicated	tRF-18-F8DHXYD9	18	Homo sapiens isolate CHM13 chromosome 16	CP068262	96330374	12	12	12	4	15	636684	636673	0
Serum_replicated	tRF-18-F8DHXYD9	18	Homo sapiens isolate CHM13 chromosome 16	CP068262	96330374	12	12	12	6	17	1457409	1457398	0
Serum_replicated	tRF-18-F8DHXYD9	18	Homo sapiens isolate CHM13 chromosome 16	CP068262	96330374	12	12	12	7	18	10861814	10861803	0
Serum_replicated	tRF-18-F8DHXYD9	18	Homo sapiens isolate CHM13 chromosome 16	CP068262	96330374	12	12	12	2	13	18627195	18627184	0
Serum_replicated	tRF-18-F8DHXYD9	18	Homo sapiens isolate CHM13 chromosome 16	CP068262	96330374	12	12	12	6	17	19331825	19331814	0
Serum_replicated	tRF-18-F8DHXYD9	18	Homo sapiens isolate CHM13 chromosome 16	CP068262	96330374	12	12	12	6	17	34977211	34977200	0
Serum_replicated	tRF-18-F8DHXYD9	18	Homo sapiens isolate CHM13 chromosome 16	CP068262	96330374	12	12	12	6	17	60324544	60324533	0
Serum_replicated	tRF-18-F8DHXYD9	18	Homo sapiens isolate CHM13 chromosome 16	CP068262	96330374	12	12	12	4	15	75640277	75640266	0
Serum_replicated	tRF-18-F8DHXYD9	18	Homo sapiens isolate CHM13 chromosome 16	CP068262	96330374	12	12	12	7	18	87168960	87168949	0
Serum_replicated	tRF-18-F8DHXYD9	18	Homo sapiens DNA, chromosome 20, nearly complete genome	AP023480	62398354	15	15	15	2	16	23937126	23937112	0
Serum_replicated	tRF-18-F8DHXYD9	18	Homo sapiens DNA, chromosome 20, nearly complete genome	AP023480	62398354	15	15	15	4	18	61913852	61913838	0
Serum_replicated	tRF-18-F8DHXYD9	18	Homo sapiens DNA, chromosome 20, nearly complete genome	AP023480	62398354	13	13	13	4	16	19256535	19256523	0
Serum_replicated	tRF-18-F8DHXYD9	18	Homo sapiens DNA, chromosome 20, nearly complete genome	AP023480	62398354	12	12	12	6	17	51242099	51242110	0
Serum_replicated	tRF-18-F8DHXYD9	18	Homo sapiens DNA, chromosome 20, nearly complete genome	AP023480	62398354	12	12	12	4	15	54780923	54780934	0
Serum_replicated	tRF-18-F8DHXYD9	18	Homo sapiens DNA, chromosome 20, nearly complete genome	AP023480	62398354	12	12	12	4	15	61127644	61127655	0
Serum_replicated	tRF-18-F8DHXYD9	18	Homo sapiens DNA, chromosome 20, nearly complete genome	AP023480	62398354	12	12	12	4	15	61127694	61127705	0
Serum_replicated	tRF-18-F8DHXYD9	18	Homo sapiens DNA, chromosome 20, nearly complete genome	AP023480	62398354	12	12	12	2	13	23998669	23998658	0
Serum_replicated	tRF-18-F8DHXYD9	18	Homo sapiens DNA, chromosome 20, nearly complete genome	AP023480	62398354	12	12	12	4	15	31837300	31837289	0
Serum_replicated	tRF-18-F8DHXYD9	18	Homo sapiens DNA, chromosome 20, nearly complete genome	AP023480	62398354	12	12	12	5	16	32285284	32285273	0
Serum_replicated	tRF-18-F8DHXYD9	18	Homo sapiens DNA, chromosome 20, nearly complete genome	AP023480	62398354	12	12	12	5	16	49413726	49413715	0
Serum_replicated	tRF-18-F8DHXYD9	18	Homo sapiens DNA, chromosome 20, nearly complete genome	AP023480	62398354	15	15	12	3	18	56648185	56648170	0
Serum_replicated	tRF-18-F8DHXYD9	18	Homo sapiens DNA, chromosome 20, nearly complete genome	AP023480	62398354	12	12	12	7	18	60058861	60058850	0
Serum_replicated	tRF-18-F8DHXYD9	18	Homo sapiens DNA, chromosome 20, nearly complete genome	AP023480	62398354	12	12	12	7	18	60573002	60572991	0
Serum_replicated	tRF-18-F8DHXYD9	18	Homo sapiens DNA, chromosome 20, nearly complete genome	AP023480	62398354	12	12	12	7	18	61748494	61748483	0
Serum_replicated	tRF-18-F8DHXYD9	18	Homo sapiens DNA, chromosome 16, nearly complete genome	AP023476	94690957	15	15	15	4	18	2727450	2727436	0
Serum_replicated	tRF-18-F8DHXYD9	18	Homo sapiens DNA, chromosome 16, nearly complete genome	AP023476	94690957	13	13	13	6	18	175368	175356	0
Serum_replicated	tRF-18-F8DHXYD9	18	Homo sapiens DNA, chromosome 16, nearly complete genome	AP023476	94690957	12	12	12	2	13	15867746	15867757	0
Serum_replicated	tRF-18-F8DHXYD9	18	Homo sapiens DNA, chromosome 16, nearly complete genome	AP023476	94690957	12	12	12	7	18	18929922	18929933	0
Serum_replicated	tRF-18-F8DHXYD9	18	Homo sapiens DNA, chromosome 16, nearly complete genome	AP023476	94690957	12	12	12	4	15	26431987	26431998	0
Serum_replicated	tRF-18-F8DHXYD9	18	Homo sapiens DNA, chromosome 16, nearly complete genome	AP023476	94690957	12	12	12	4	15	30671633	30671644	0
Serum_replicated	tRF-18-F8DHXYD9	18	Homo sapiens DNA, chromosome 16, nearly complete genome	AP023476	94690957	12	12	12	4	15	89951334	89951345	0
Serum_replicated	tRF-18-F8DHXYD9	18	Homo sapiens DNA, chromosome 16, nearly complete genome	AP023476	94690957	12	12	12	5	16	90449447	90449458	0
Serum_replicated	tRF-18-F8DHXYD9	18	Homo sapiens DNA, chromosome 16, nearly complete genome	AP023476	94690957	12	12	12	4	15	91055689	91055700	0
Serum_replicated	tRF-18-F8DHXYD9	18	Homo sapiens DNA, chromosome 16, nearly complete genome	AP023476	94690957	12	12	12	4	15	623084	623073	0
Serum_replicated	tRF-18-F8DHXYD9	18	Homo sapiens DNA, chromosome 16, nearly complete genome	AP023476	94690957	12	12	12	6	17	1455285	1455274	0
Serum_replicated	tRF-18-F8DHXYD9	18	Homo sapiens DNA, chromosome 16, nearly complete genome	AP023476	94690957	12	12	12	7	18	10905814	10905803	0
Serum_replicated	tRF-18-F8DHXYD9	18	Homo sapiens DNA, chromosome 16, nearly complete genome	AP023476	94690957	12	12	12	6	17	18265860	18265849	0
Serum_replicated	tRF-18-F8DHXYD9	18	Homo sapiens DNA, chromosome 16, nearly complete genome	AP023476	94690957	12	12	12	6	17	58923134	58923123	0
Serum_replicated	tRF-18-F8DHXYD9	18	Homo sapiens DNA, chromosome 16, nearly complete genome	AP023476	94690957	12	12	12	4	15	74241139	74241128	0
Serum_replicated	tRF-18-F8DHXYD9	18	Homo sapiens DNA, chromosome 16, nearly complete genome	AP023476	94690957	12	12	12	7	18	85643205	85643194	0
Serum_replicated	tRF-18-F8DHXYD9	18	Homo sapiens chromosome unknown clone VMRC59-218D02, complete sequence	AC279547	142752	15	15	15	2	16	94014	94000	0
Serum_replicated	tRF-18-F8DHXYD9	18	Homo sapiens chromosome unknown clone VMRC59-218D02, complete sequence	AC279547	142752	12	12	12	5	16	5146	5135	0
Serum_replicated	tRF-18-F8DHXYD9	18	Homo sapiens BAC clone CH17-475O7 from chromosome 22, complete sequence	AC244157	206505	15	15	15	2	16	153288	153274	0
Serum_replicated	tRF-18-F8DHXYD9	18	Homo sapiens POM121 transmembrane nucleoporin like 10, pseudogene (POM121L10P), non-coding RNA	NR_024593	9547	15	15	15	2	16	2448	2434	0
Serum_replicated	tRF-18-F8DHXYD9	18	Homo sapiens chromosome 16 clone CTD-2270P14, complete sequence	AC092117	211606	15	15	15	4	18	84760	84746	0
Serum_replicated	tRF-18-F8DHXYD9	18	Human DNA sequence from clone RP11-360D14 on chromosome 6, complete sequence	AL592426	107647	15	15	15	4	18	44551	44537	0
Serum_replicated	tRF-18-F8DHXYD9	18	Human DNA sequence from clone RP5-831C21 on chromosome 20, complete sequence	AL133466	117890	15	15	15	2	16	35971	35957	0
Serum_replicated	tRF-18-F8DHXYD9	18	Human DNA sequence from clone RP5-831C21 on chromosome 20, complete sequence	AL133466	117890	12	12	12	2	13	97512	97501	0
Serum_replicated	tRF-18-F8DHXYD9	18	Human DNA sequence from clone RP4-583P15 on chromosome 20, complete sequence	AL121845	120917	15	15	15	4	18	107646	107632	0
Serum_replicated	tRF-18-F8DHXYD9	18	Homo sapiens chromosome 16 clone CTD-2593F12, complete sequence	AC093517	160606	15	15	15	4	18	78180	78166	0
Serum_replicated	tRF-18-F8DHXYD9	18	Homo sapiens chromosome 22 clone pac699j1 map 22q12, complete sequence	AC008103	98557	15	15	15	2	16	3391	3377	0
Serum_replicated	tRF-18-F8DHXYD9	18	Homo sapiens chromosome 22 clone b291 map 22q11, complete sequence	AC007981	175358	15	15	15	2	16	136261	136247	0
Serum_replicated	tRF-18-F8DHXYD9	18	Homo sapiens chromosome 22 clone b291 map 22q11, complete sequence	AC007981	175358	12	12	12	5	16	47369	47358	0
Serum_replicated	tRF-18-F8DHXYD9	18	Homo sapiens chromosome 22 clone b41c4 map 22q11, complete sequence	AC012331	143376	15	15	15	2	16	76420	76406	0
Serum_replicated	tRF-18-F8DHXYD9	18	Homo sapiens chromosome 22 clone bac32 map 22q11, complete sequence	AC007050	163908	15	15	15	2	16	140195	140181	0
Serum_replicated	tRF-18-F8DHXYD9	18	Homo sapiens chromosome 22 clone b563b9 map 22q11, complete sequence	AC007708	106650	15	15	15	2	16	56464	56450	0
Serum_replicated	tRF-18-F8DHXYD9	18	Homo sapiens genomic DNA, chromosome 22q11.2, clone KB1674E1	AP000354	164756	15	15	15	2	16	32596	32582	0
Serum_replicated	tRF-18-F8DHXYD9	18	Homo sapiens cysteinyl-tRNA synthetase 2, mitochondrial (CARS2), RefSeqGene on chromosome 13; nuclear gene for mitochondrial product	NG_042045	79192	14	14	14	4	17	52542	52555	0
Serum_replicated	tRF-18-F8DHXYD9	18	Homo sapiens chromosome 22 clone CH17-50J9, complete sequence	AC277850	229172	14	14	14	3	16	46790	46803	0
Serum_replicated	tRF-18-F8DHXYD9	18	Homo sapiens chromosome 22 clone CH17-50J9, complete sequence	AC277850	229172	12	12	12	5	16	117822	117811	0
Serum_replicated	tRF-18-F8DHXYD9	18	Homo sapiens chromosome 10 clone CH17-32B18, complete sequence	AC277832	218942	17	17	14	1	18	1195	1212	0
Serum_replicated	tRF-18-F8DHXYD9	18	PREDICTED: Homo sapiens cysteinyl-tRNA synthetase 2, mitochondrial (CARS2), transcript variant X6, misc_RNA	XR_008488779	2938	14	14	14	4	17	1811	1824	0
Serum_replicated	tRF-18-F8DHXYD9	18	Homo sapiens H3K27ac-H3K4me1 hESC enhancer GRCh37_chr19:47852412-47853316 (LOC127891852) on chromosome 19	NG_141694	1105	14	14	14	2	15	137	150	0
Serum_replicated	tRF-18-F8DHXYD9	18	Homo sapiens H3K4me1 hESC enhancer GRCh37_chr18:74770546-74771179 (LOC127889631) on chromosome 18	NG_139149	834	14	14	14	4	17	511	524	0
Serum_replicated	tRF-18-F8DHXYD9	18	Homo sapiens H3K4me1 hESC enhancer GRCh37_chr12:131795285-131796186 (LOC127825731) on chromosome 12	NG_127243	1102	14	14	14	4	17	834	847	0
Serum_replicated	tRF-18-F8DHXYD9	18	Homo sapiens RP1 axonemal microtubule associated (RP1), RefSeqGene on chromosome 8	NG_009840	319050	14	14	14	4	17	61351	61364	0
Serum_replicated	tRF-18-F8DHXYD9	18	PREDICTED: Homo sapiens cysteinyl-tRNA synthetase 2, mitochondrial (CARS2), transcript variant X6, misc_RNA	XR_007063696	2938	14	14	14	4	17	1811	1824	0
Serum_replicated	tRF-18-F8DHXYD9	18	Homo sapiens isolate CHM13 chromosome 19	CP068259	61707364	14	14	14	2	15	50174655	50174668	0
Serum_replicated	tRF-18-F8DHXYD9	18	Homo sapiens isolate CHM13 chromosome 19	CP068259	61707364	13	13	13	5	17	47567681	47567693	0
Serum_replicated	tRF-18-F8DHXYD9	18	Homo sapiens isolate CHM13 chromosome 19	CP068259	61707364	13	13	13	5	17	51475637	51475625	0
Serum_replicated	tRF-18-F8DHXYD9	18	Homo sapiens isolate CHM13 chromosome 19	CP068259	61707364	12	12	12	5	16	1177482	1177471	0
Serum_replicated	tRF-18-F8DHXYD9	18	Homo sapiens isolate CHM13 chromosome 19	CP068259	61707364	12	12	12	7	18	1222788	1222777	0
Serum_replicated	tRF-18-F8DHXYD9	18	Homo sapiens isolate CHM13 chromosome 19	CP068259	61707364	12	12	12	4	15	1439827	1439816	0
Serum_replicated	tRF-18-F8DHXYD9	18	Homo sapiens isolate CHM13 chromosome 19	CP068259	61707364	15	15	12	2	17	7464447	7464432	0
Serum_replicated	tRF-18-F8DHXYD9	18	Homo sapiens isolate CHM13 chromosome 19	CP068259	61707364	12	12	12	7	18	11039302	11039291	0
Serum_replicated	tRF-18-F8DHXYD9	18	Homo sapiens isolate CHM13 chromosome 19	CP068259	61707364	12	12	12	7	18	12894566	12894555	0
Serum_replicated	tRF-18-F8DHXYD9	18	Homo sapiens isolate CHM13 chromosome 19	CP068259	61707364	12	12	12	7	18	12998180	12998169	0
Serum_replicated	tRF-18-F8DHXYD9	18	Homo sapiens isolate CHM13 chromosome 15	CP068263	99753195	14	14	14	4	17	36747149	36747162	0
Serum_replicated	tRF-18-F8DHXYD9	18	Homo sapiens isolate CHM13 chromosome 15	CP068263	99753195	17	17	14	1	18	43095289	43095306	0
Serum_replicated	tRF-18-F8DHXYD9	18	Homo sapiens isolate CHM13 chromosome 15	CP068263	99753195	13	13	13	4	16	63974216	63974204	0
Serum_replicated	tRF-18-F8DHXYD9	18	Homo sapiens isolate CHM13 chromosome 15	CP068263	99753195	12	12	12	5	16	19080344	19080355	0
Serum_replicated	tRF-18-F8DHXYD9	18	Homo sapiens isolate CHM13 chromosome 15	CP068263	99753195	12	12	12	6	17	50732040	50732051	0
Serum_replicated	tRF-18-F8DHXYD9	18	Homo sapiens isolate CHM13 chromosome 15	CP068263	99753195	12	12	12	7	18	60195366	60195377	0
Serum_replicated	tRF-18-F8DHXYD9	18	Homo sapiens isolate CHM13 chromosome 15	CP068263	99753195	12	12	12	7	18	66595441	66595452	0
Serum_replicated	tRF-18-F8DHXYD9	18	Homo sapiens isolate CHM13 chromosome 15	CP068263	99753195	12	12	12	5	16	75487327	75487338	0
Serum_replicated	tRF-18-F8DHXYD9	18	Homo sapiens isolate CHM13 chromosome 15	CP068263	99753195	12	12	12	5	16	90813183	90813194	0
Serum_replicated	tRF-18-F8DHXYD9	18	Homo sapiens isolate CHM13 chromosome 15	CP068263	99753195	12	12	12	5	16	22810884	22810873	0
Serum_replicated	tRF-18-F8DHXYD9	18	Homo sapiens isolate CHM13 chromosome 15	CP068263	99753195	12	12	12	6	17	23045092	23045081	0
Serum_replicated	tRF-18-F8DHXYD9	18	Homo sapiens DNA, chromosome 19, nearly complete genome	AP023479	59105444	14	14	14	2	15	47512392	47512405	0
Serum_replicated	tRF-18-F8DHXYD9	18	Homo sapiens DNA, chromosome 19, nearly complete genome	AP023479	59105444	13	13	13	5	17	44908466	44908478	0
Serum_replicated	tRF-18-F8DHXYD9	18	Homo sapiens DNA, chromosome 19, nearly complete genome	AP023479	59105444	13	13	13	5	17	48765922	48765910	0
Serum_replicated	tRF-18-F8DHXYD9	18	Homo sapiens DNA, chromosome 19, nearly complete genome	AP023479	59105444	12	12	12	5	16	1062985	1062974	0
Serum_replicated	tRF-18-F8DHXYD9	18	Homo sapiens DNA, chromosome 19, nearly complete genome	AP023479	59105444	12	12	12	7	18	1107935	1107924	0
Serum_replicated	tRF-18-F8DHXYD9	18	Homo sapiens DNA, chromosome 19, nearly complete genome	AP023479	59105444	12	12	12	4	15	1325092	1325081	0
Serum_replicated	tRF-18-F8DHXYD9	18	Homo sapiens DNA, chromosome 19, nearly complete genome	AP023479	59105444	15	15	12	2	17	7372610	7372595	0
Serum_replicated	tRF-18-F8DHXYD9	18	Homo sapiens DNA, chromosome 19, nearly complete genome	AP023479	59105444	12	12	12	7	18	10798624	10798613	0
Serum_replicated	tRF-18-F8DHXYD9	18	Homo sapiens DNA, chromosome 19, nearly complete genome	AP023479	59105444	12	12	12	7	18	12655670	12655659	0
Serum_replicated	tRF-18-F8DHXYD9	18	Homo sapiens DNA, chromosome 19, nearly complete genome	AP023479	59105444	12	12	12	7	18	12758758	12758747	0
Serum_replicated	tRF-18-F8DHXYD9	18	Homo sapiens DNA, chromosome 19, nearly complete genome	AP023479	59105444	15	15	12	3	18	35380860	35380845	0
Serum_replicated	tRF-18-F8DHXYD9	18	Homo sapiens DNA, chromosome 15, nearly complete genome	AP023475	95537968	14	14	14	4	17	32659896	32659909	0
Serum_replicated	tRF-18-F8DHXYD9	18	Homo sapiens DNA, chromosome 15, nearly complete genome	AP023475	95537968	17	17	14	1	18	39005965	39005982	0
Serum_replicated	tRF-18-F8DHXYD9	18	Homo sapiens DNA, chromosome 15, nearly complete genome	AP023475	95537968	13	13	13	4	16	59875699	59875687	0
Serum_replicated	tRF-18-F8DHXYD9	18	Homo sapiens DNA, chromosome 15, nearly complete genome	AP023475	95537968	12	12	12	5	16	17481098	17481109	0
Serum_replicated	tRF-18-F8DHXYD9	18	Homo sapiens DNA, chromosome 15, nearly complete genome	AP023475	95537968	12	12	12	6	17	46640653	46640664	0
Serum_replicated	tRF-18-F8DHXYD9	18	Homo sapiens DNA, chromosome 15, nearly complete genome	AP023475	95537968	12	12	12	7	18	56102743	56102754	0
Serum_replicated	tRF-18-F8DHXYD9	18	Homo sapiens DNA, chromosome 15, nearly complete genome	AP023475	95537968	12	12	12	7	18	62495371	62495382	0
Serum_replicated	tRF-18-F8DHXYD9	18	Homo sapiens DNA, chromosome 15, nearly complete genome	AP023475	95537968	12	12	12	5	16	71348017	71348028	0
Serum_replicated	tRF-18-F8DHXYD9	18	Homo sapiens DNA, chromosome 15, nearly complete genome	AP023475	95537968	12	12	12	5	16	86672810	86672821	0
Serum_replicated	tRF-18-F8DHXYD9	18	Homo sapiens DNA, chromosome 15, nearly complete genome	AP023475	95537968	12	12	12	5	16	19907475	19907464	0
Serum_replicated	tRF-18-F8DHXYD9	18	Homo sapiens DNA, chromosome 15, nearly complete genome	AP023475	95537968	12	12	12	6	17	20141738	20141727	0
Serum_replicated	tRF-18-F8DHXYD9	18	Homo sapiens chromosome 22 clone CH17-369L23, complete sequence	AC277836	225459	14	14	14	3	16	117118	117105	0
Serum_replicated	tRF-18-F8DHXYD9	18	Homo sapiens chromosome 22 clone CH17-369L23, complete sequence	AC277836	225459	12	12	12	5	16	46098	46109	0
Serum_replicated	tRF-18-F8DHXYD9	18	Homo sapiens chromosome 22 clone CH17-232B17, complete sequence	AC277820	245081	14	14	14	3	16	192897	192884	0
Serum_replicated	tRF-18-F8DHXYD9	18	Homo sapiens chromosome 22 clone CH17-232B17, complete sequence	AC277820	245081	12	12	12	5	16	121869	121880	0
Serum_replicated	tRF-18-F8DHXYD9	18	Homo sapiens H3K4me1 hESC enhancer GRCh37_chr12:132130763-132131753 (LOC127825759) on chromosome 12	NG_127271	1191	14	14	14	4	17	502	489	0
Serum_replicated	tRF-18-F8DHXYD9	18	PREDICTED: Homo sapiens uncharacterized LOC105370777 (LOC105370777), transcript variant X1, ncRNA	XR_007085882	3716	14	14	14	4	17	1880	1867	0
Serum_replicated	tRF-18-F8DHXYD9	18	PREDICTED: Homo sapiens uncharacterized LOC105370777 (LOC105370777), transcript variant X1, ncRNA	XR_007064586	3716	14	14	14	4	17	1880	1867	0
Serum_replicated	tRF-18-F8DHXYD9	18	PREDICTED: Homo sapiens uncharacterized LOC124903055 (LOC124903055), transcript variant X1, ncRNA	XR_007063528	2683	14	14	14	4	17	1236	1223	0
Serum_replicated	tRF-18-F8DHXYD9	18	Homo sapiens isolate CHM13 chromosome 18	CP068260	80542538	14	14	14	4	17	48149111	48149098	0
Serum_replicated	tRF-18-F8DHXYD9	18	Homo sapiens isolate CHM13 chromosome 18	CP068260	80542538	13	13	13	4	16	10832073	10832085	0
Serum_replicated	tRF-18-F8DHXYD9	18	Homo sapiens isolate CHM13 chromosome 18	CP068260	80542538	12	12	12	5	16	3749790	3749801	0
Serum_replicated	tRF-18-F8DHXYD9	18	Homo sapiens isolate CHM13 chromosome 18	CP068260	80542538	12	12	12	7	18	12583364	12583375	0
Serum_replicated	tRF-18-F8DHXYD9	18	Homo sapiens isolate CHM13 chromosome 18	CP068260	80542538	12	12	12	7	18	48878446	48878457	0
Serum_replicated	tRF-18-F8DHXYD9	18	Homo sapiens isolate CHM13 chromosome 18	CP068260	80542538	12	12	12	7	18	49033665	49033676	0
Serum_replicated	tRF-18-F8DHXYD9	18	Homo sapiens isolate CHM13 chromosome 18	CP068260	80542538	12	12	12	6	17	49144177	49144188	0
Serum_replicated	tRF-18-F8DHXYD9	18	Homo sapiens isolate CHM13 chromosome 18	CP068260	80542538	12	12	12	6	17	49468887	49468898	0
Serum_replicated	tRF-18-F8DHXYD9	18	Homo sapiens isolate CHM13 chromosome 18	CP068260	80542538	12	12	12	5	16	62702221	62702232	0
Serum_replicated	tRF-18-F8DHXYD9	18	Homo sapiens isolate CHM13 chromosome 18	CP068260	80542538	12	12	12	7	18	75479927	75479938	0
Serum_replicated	tRF-18-F8DHXYD9	18	Homo sapiens isolate CHM13 chromosome 18	CP068260	80542538	12	12	12	6	17	6670836	6670825	0
Serum_replicated	tRF-18-F8DHXYD9	18	Homo sapiens isolate CHM13 chromosome 18	CP068260	80542538	12	12	12	4	15	10024324	10024313	0
Serum_replicated	tRF-18-F8DHXYD9	18	Homo sapiens isolate CHM13 chromosome 18	CP068260	80542538	12	12	12	1	12	55542771	55542760	0
Serum_replicated	tRF-18-F8DHXYD9	18	Homo sapiens isolate CHM13 chromosome 18	CP068260	80542538	12	12	12	5	16	64941295	64941284	0
Serum_replicated	tRF-18-F8DHXYD9	18	Homo sapiens isolate CHM13 chromosome 18	CP068260	80542538	12	12	12	7	18	74465398	74465387	0
Serum_replicated	tRF-18-F8DHXYD9	18	Homo sapiens DNA, chromosome 18, nearly complete genome	AP023478	77846715	14	14	14	4	17	45413413	45413400	0
Serum_replicated	tRF-18-F8DHXYD9	18	Homo sapiens DNA, chromosome 18, nearly complete genome	AP023478	77846715	13	13	13	4	16	10681787	10681799	0
Serum_replicated	tRF-18-F8DHXYD9	18	Homo sapiens DNA, chromosome 18, nearly complete genome	AP023478	77846715	12	12	12	5	16	3603902	3603913	0
Serum_replicated	tRF-18-F8DHXYD9	18	Homo sapiens DNA, chromosome 18, nearly complete genome	AP023478	77846715	12	12	12	7	18	12431369	12431380	0
Serum_replicated	tRF-18-F8DHXYD9	18	Homo sapiens DNA, chromosome 18, nearly complete genome	AP023478	77846715	12	12	12	7	18	46142551	46142562	0
Serum_replicated	tRF-18-F8DHXYD9	18	Homo sapiens DNA, chromosome 18, nearly complete genome	AP023478	77846715	12	12	12	7	18	46297896	46297907	0
Serum_replicated	tRF-18-F8DHXYD9	18	Homo sapiens DNA, chromosome 18, nearly complete genome	AP023478	77846715	12	12	12	6	17	46408331	46408342	0
Serum_replicated	tRF-18-F8DHXYD9	18	Homo sapiens DNA, chromosome 18, nearly complete genome	AP023478	77846715	12	12	12	6	17	46734397	46734408	0
Serum_replicated	tRF-18-F8DHXYD9	18	Homo sapiens DNA, chromosome 18, nearly complete genome	AP023478	77846715	12	12	12	5	16	59956714	59956725	0
Serum_replicated	tRF-18-F8DHXYD9	18	Homo sapiens DNA, chromosome 18, nearly complete genome	AP023478	77846715	12	12	12	7	18	72796161	72796172	0
Serum_replicated	tRF-18-F8DHXYD9	18	Homo sapiens DNA, chromosome 18, nearly complete genome	AP023478	77846715	12	12	12	6	17	6524496	6524485	0
Serum_replicated	tRF-18-F8DHXYD9	18	Homo sapiens DNA, chromosome 18, nearly complete genome	AP023478	77846715	12	12	12	4	15	9873626	9873615	0
Serum_replicated	tRF-18-F8DHXYD9	18	Homo sapiens DNA, chromosome 18, nearly complete genome	AP023478	77846715	12	12	12	1	12	52796341	52796330	0
Serum_replicated	tRF-18-F8DHXYD9	18	Homo sapiens DNA, chromosome 18, nearly complete genome	AP023478	77846715	12	12	12	7	18	71781766	71781755	0
Serum_replicated	tRF-19-DRXSE5I2	19	Chain CC, tRNA	6Z6M_CC	85	19	19	19	1	19	67	85	0
Serum_replicated	tRF-19-DRXSE5I2	19	Homo sapiens CST telomere replication complex component 1 (CTC1), transcript variant 2, non-coding RNA	NR_046431	6869	16	16	16	1	16	5059	5074	0
Serum_replicated	tRF-19-DRXSE5I2	19	Homo sapiens CST telomere replication complex component 1 (CTC1), transcript variant 1, mRNA	NM_025099	7039	16	16	16	1	16	5229	5244	0
Serum_replicated	tRF-19-DRXSE5I2	19	Homo sapiens CST telomere replication complex component 1 (CTC1), RefSeqGene (LRG_1124) on chromosome 17	NG_032148	30275	16	16	16	1	16	26471	26486	0
Serum_replicated	tRF-19-DRXSE5I2	19	PREDICTED: Homo sapiens CST telomere replication complex component 1 (CTC1), transcript variant X12, mRNA	XM_054317348	6465	16	16	16	1	16	4655	4670	0
Serum_replicated	tRF-19-DRXSE5I2	19	PREDICTED: Homo sapiens CST telomere replication complex component 1 (CTC1), transcript variant X11, mRNA	XM_054317347	6461	16	16	16	1	16	4651	4666	0
Serum_replicated	tRF-19-DRXSE5I2	19	PREDICTED: Homo sapiens CST telomere replication complex component 1 (CTC1), transcript variant X6, mRNA	XM_054317342	6679	16	16	16	1	16	4869	4884	0
Serum_replicated	tRF-19-DRXSE5I2	19	PREDICTED: Homo sapiens CST telomere replication complex component 1 (CTC1), transcript variant X5, mRNA	XM_054317341	6703	16	16	16	1	16	4893	4908	0
Serum_replicated	tRF-19-DRXSE5I2	19	PREDICTED: Homo sapiens CST telomere replication complex component 1 (CTC1), transcript variant X3, mRNA	XM_054317339	6805	16	16	16	1	16	4995	5010	0
Serum_replicated	tRF-19-DRXSE5I2	19	PREDICTED: Homo sapiens CST telomere replication complex component 1 (CTC1), transcript variant X2, mRNA	XM_054317338	6910	16	16	16	1	16	5100	5115	0
Serum_replicated	tRF-19-DRXSE5I2	19	PREDICTED: Homo sapiens CST telomere replication complex component 1 (CTC1), transcript variant X1, mRNA	XM_054317337	6934	16	16	16	1	16	5124	5139	0
Serum_replicated	tRF-19-DRXSE5I2	19	Homo sapiens CST telomere replication complex component 1 (CTC1), transcript variant 3, mRNA	NM_001411067	6808	16	16	16	1	16	4998	5013	0
Serum_replicated	tRF-19-DRXSE5I2	19	PREDICTED: Homo sapiens uncharacterized LOC105375001 (LOC105375001), transcript variant X2, ncRNA	XR_007076674	5888	16	16	16	1	16	3971	3986	0
Serum_replicated	tRF-19-DRXSE5I2	19	PREDICTED: Homo sapiens CST telomere replication complex component 1 (CTC1), transcript variant X12, mRNA	XM_011524011	6465	16	16	16	1	16	4655	4670	0
Serum_replicated	tRF-19-DRXSE5I2	19	PREDICTED: Homo sapiens CST telomere replication complex component 1 (CTC1), transcript variant X11, mRNA	XM_047436807	6461	16	16	16	1	16	4651	4666	0
Serum_replicated	tRF-19-DRXSE5I2	19	PREDICTED: Homo sapiens CST telomere replication complex component 1 (CTC1), transcript variant X6, mRNA	XM_047436802	6679	16	16	16	1	16	4869	4884	0
Serum_replicated	tRF-19-DRXSE5I2	19	PREDICTED: Homo sapiens CST telomere replication complex component 1 (CTC1), transcript variant X5, mRNA	XM_047436801	6703	16	16	16	1	16	4893	4908	0
Serum_replicated	tRF-19-DRXSE5I2	19	PREDICTED: Homo sapiens CST telomere replication complex component 1 (CTC1), transcript variant X3, mRNA	XM_047436799	6805	16	16	16	1	16	4995	5010	0
Serum_replicated	tRF-19-DRXSE5I2	19	PREDICTED: Homo sapiens CST telomere replication complex component 1 (CTC1), transcript variant X2, mRNA	XM_006721577	6910	16	16	16	1	16	5100	5115	0
Serum_replicated	tRF-19-DRXSE5I2	19	PREDICTED: Homo sapiens CST telomere replication complex component 1 (CTC1), transcript variant X1, mRNA	XM_011524010	6934	16	16	16	1	16	5124	5139	0
Serum_replicated	tRF-19-DRXSE5I2	19	Homo sapiens LHRI_LNC2368.1 lncRNA, complete sequence	MW803863	239	16	16	16	1	16	61	76	0
Serum_replicated	tRF-19-DRXSE5I2	19	Homo sapiens LHRI_LNC2367.1 lncRNA, complete sequence	MW803862	589	16	16	16	1	16	178	193	0
Serum_replicated	tRF-19-DRXSE5I2	19	TPA: Homo sapiens tRNA-Ser-TGA-3-1 gene	HG984034	82	16	16	16	1	16	67	82	0
Serum_replicated	tRF-19-DRXSE5I2	19	TPA: Homo sapiens tRNA-Ser-TGA-2-1 gene >gi|634723279|tpe|HG984536.1| TPA: Mus musculus tRNA-Ser-TGA-2-1 gene >gi|634723281|tpe|HG984537.1| TPA: Mus musculus tRNA-Ser-TGA-2-2 gene	HG984033	82	16	16	16	1	16	67	82	0
Serum_replicated	tRF-19-DRXSE5I2	19	TPA: Homo sapiens tRNA-Ser-AGA-4-1 gene	HG984016	82	16	16	16	1	16	67	82	0
Serum_replicated	tRF-19-DRXSE5I2	19	TPA: Homo sapiens tRNA-Ser-AGA-3-1 gene	HG984015	82	16	16	16	1	16	67	82	0
Serum_replicated	tRF-19-DRXSE5I2	19	TPA: Homo sapiens tRNA-Ser-AGA-2-6 gene >gi|634722334|tpe|HG984010.1| TPA: Homo sapiens tRNA-Ser-AGA-2-1 gene >gi|634722336|tpe|HG984011.1| TPA: Homo sapiens tRNA-Ser-AGA-2-2 gene >gi|634722338|tpe|HG984012.1| TPA: Homo sapiens tRNA-Ser-AGA-2-3 gene >gi|634722340|tpe|HG984013.1| TPA: Homo sapiens tRNA-Ser-AGA-2-4 gene >gi|634722342|tpe|HG984014.1| TPA: Homo sapiens tRNA-Ser-AGA-2-5 gene >gi|63472…	HG984009	82	16	16	16	1	16	67	82	0
Serum_replicated	tRF-19-DRXSE5I2	19	TPA: Homo sapiens tRNA-Ser-AGA-1-1 gene >gi|634723244|tpe|HG984514.1| TPA: Mus musculus tRNA-Ser-AGA-1-1 gene	HG984008	82	16	16	16	1	16	67	82	0
Serum_replicated	tRF-19-DRXSE5I2	19	Homo sapiens cilia and flagella associated protein 418 (CFAP418), RefSeqGene on chromosome 8	NG_032804	31322	16	16	16	1	16	4563	4578	0
Serum_replicated	tRF-19-DRXSE5I2	19	Homo sapiens piRNA piR-33081, complete sequence	DQ592969	31	16	16	16	2	17	16	31	0
Serum_replicated	tRF-19-DRXSE5I2	19	Homo sapiens, clone RP11-328L11, complete sequence	AC024995	171873	16	16	16	1	16	165783	165798	0
Serum_replicated	tRF-19-DRXSE5I2	19	Human DNA sequence from clone RP1-45P21 on chromosome 6p21.3-22.2, complete sequence	AL021917	170001	16	16	16	1	16	43836	43851	0
Serum_replicated	tRF-19-DRXSE5I2	19	Human DNA sequence from clone RP1-45P21 on chromosome 6p21.3-22.2, complete sequence	AL021917	170001	16	16	16	1	16	28792	28777	0
Serum_replicated	tRF-19-DRXSE5I2	19	Human DNA sequence from clone SCb-34I8 on chromosome 6p21.3-22.1, complete sequence	AL021918	159506	16	16	16	1	16	27786	27801	0
Serum_replicated	tRF-19-DRXSE5I2	19	Human DNA sequence from clone SCb-34I8 on chromosome 6p21.3-22.1, complete sequence	AL021918	159506	16	16	16	1	16	44788	44803	0
Serum_replicated	tRF-19-DRXSE5I2	19	Human DNA sequence from clone SCb-34I8 on chromosome 6p21.3-22.1, complete sequence	AL021918	159506	16	16	16	1	16	52013	52028	0
Serum_replicated	tRF-19-DRXSE5I2	19	Human DNA sequence from clone SCb-34I8 on chromosome 6p21.3-22.1, complete sequence	AL021918	159506	16	16	16	1	16	81182	81197	0
Serum_replicated	tRF-19-DRXSE5I2	19	Human DNA sequence from clone SCb-34I8 on chromosome 6p21.3-22.1, complete sequence	AL021918	159506	16	16	16	1	16	94663	94678	0
Serum_replicated	tRF-19-DRXSE5I2	19	Human DNA sequence from clone SCb-34I8 on chromosome 6p21.3-22.1, complete sequence	AL021918	159506	16	16	16	1	16	90698	90683	0
Serum_replicated	tRF-19-DRXSE5I2	19	Human DNA sequence from clone SCb-34I8 on chromosome 6p21.3-22.1, complete sequence	AL021918	159506	16	16	16	1	16	102336	102321	0
Serum_replicated	tRF-19-DRXSE5I2	19	Homo sapiens chromosome 17, clone RP11-849F2, complete sequence	AC135178	188340	16	16	16	1	16	157958	157973	0
Serum_replicated	tRF-19-DRXSE5I2	19	Human Ser-tRNA gene	M38616	650	16	16	16	1	16	179	194	0
Serum_replicated	tRF-19-DRXSE5I2	19	H.sapiens CpG island DNA genomic Mse1 fragment, clone 62e4, reverse read cpg62e4.rt1a	Z62051	289	16	16	16	1	16	47	62	0
Serum_replicated	tRF-19-DRXSE5I2	19	H.sapiens CpG island DNA genomic Mse1 fragment, clone 39a1, forward read cpg39a1.ft1c	Z58403	140	16	16	16	1	16	49	64	0
Serum_replicated	tRF-19-DRXSE5I2	19	Human gene for transfer RNA-Ser (UGA)	Y00355	467	16	16	16	1	16	178	193	0
Serum_replicated	tRF-19-DRXSE5I2	19	Human gene for tRNA-Ser	X06760	390	16	16	16	1	16	244	259	0
Serum_replicated	tRF-19-DRXSE5I2	19	Human gene for tRNA-ser	X06221	363	16	16	16	1	16	179	194	0
Serum_replicated	tRF-19-DRXSE5I2	19	Homo sapiens H3K27ac hESC enhancer GRCh37_chr8:96281415-96282054 (LOC127459948) on chromosome 8	NG_114717	840	16	16	16	1	16	586	571	0
Serum_replicated	tRF-19-DRXSE5I2	19	Homo sapiens isolate CHM13 chromosome 17	CP068261	84276897	16	16	16	1	16	8132855	8132840	0
Serum_replicated	tRF-19-DRXSE5I2	19	Homo sapiens isolate CHM13 chromosome 17	CP068261	84276897	14	14	14	2	15	79657325	79657312	0
Serum_replicated	tRF-19-DRXSE5I2	19	Homo sapiens isolate CHM13 chromosome 17	CP068261	84276897	12	12	12	3	14	43922152	43922163	0
Serum_replicated	tRF-19-DRXSE5I2	19	Homo sapiens isolate CHM13 chromosome 17	CP068261	84276897	12	12	12	2	13	70063839	70063850	0
Serum_replicated	tRF-19-DRXSE5I2	19	Homo sapiens isolate CHM13 chromosome 17	CP068261	84276897	12	12	12	1	12	80918089	80918100	0
Serum_replicated	tRF-19-DRXSE5I2	19	Homo sapiens DNA, chromosome 17, nearly complete genome	AP023477	80688777	16	16	16	1	16	8309616	8309601	0
Serum_replicated	tRF-19-DRXSE5I2	19	Homo sapiens DNA, chromosome 17, nearly complete genome	AP023477	80688777	14	14	14	2	15	76256868	76256855	0
Serum_replicated	tRF-19-DRXSE5I2	19	Homo sapiens DNA, chromosome 17, nearly complete genome	AP023477	80688777	12	12	12	3	14	40819669	40819680	0
Serum_replicated	tRF-19-DRXSE5I2	19	Homo sapiens DNA, chromosome 17, nearly complete genome	AP023477	80688777	12	12	12	2	13	66662191	66662202	0
Serum_replicated	tRF-19-DRXSE5I2	19	Homo sapiens DNA, chromosome 17, nearly complete genome	AP023477	80688777	12	12	12	1	12	77513232	77513243	0
Serum_replicated	tRF-19-DRXSE5I2	19	Homo sapiens genomic DNA, chromosome 8q23, clone:KB1047C11	AP003466	154371	16	16	16	1	16	132525	132510	0
Serum_replicated	tRF-19-DRXSE5I2	19	Homo sapiens chromosome 5 clone CTC-571O20, complete sequence	AC091393	217781	18	18	15	1	19	192295	192313	0
Serum_replicated	tRF-19-DRXSE5I2	19	Homo sapiens chromosome 5 clone CTB-40D4, complete sequence	AC020903	127321	18	18	15	1	19	98445	98427	0
Serum_replicated	tRF-19-DRXSE5I2	19	Homo sapiens H3K27ac hESC enhancer GRCh37_chr10:59576275-59576774 (LOC127818069) on chromosome 10	NG_119543	700	17	17	14	2	19	278	295	0
Serum_replicated	tRF-19-DRXSE5I2	19	Homo sapiens H3K27ac hESC enhancer GRCh37_chr1:168239605-168240105 (LOC127270784) on chromosome 1	NG_092636	701	17	17	14	2	19	318	335	0
Serum_replicated	tRF-19-DRXSE5I2	19	Homo sapiens BAC clone RP11-561N12 from 7, complete sequence	AC016769	203572	14	14	14	1	14	6617	6630	0
Serum_replicated	tRF-19-DRXSE5I2	19	Human DNA sequence from clone RP11-77N10 on chromosome 10, complete sequence	AL928688	165910	17	17	14	2	19	101573	101590	0
Serum_replicated	tRF-19-DRXSE5I2	19	Homo sapiens chromosome 5 clone RP11-560F8, complete sequence	AC113416	190848	17	17	14	2	19	134869	134886	0
Serum_replicated	tRF-19-DRXSE5I2	19	Human DNA sequence from clone RP11-257E20 on chromosome 10, complete sequence	AL935036	166004	17	17	14	2	19	32069	32086	0
Serum_replicated	tRF-19-DRXSE5I2	19	Homo sapiens genomic sequence surrounding NotI site, clone NR1-QP14R	AJ323894	703	14	14	14	5	18	33	46	0
Serum_replicated	tRF-19-DRXSE5I2	19	Human DNA sequence from clone RP1-207J11 on chromosome 7 Contains ESTs and STSs. Contains two zinc finger protein pseudogenes, a putative novel gene and an HNRPC (heterogeneous nuclear ribonucleoprotein C (C1/C2)) pseudogene, complete sequence	AL136969	79666	14	14	14	1	14	52183	52196	0
Serum_replicated	tRF-19-DRXSE5I2	19	Human DNA sequence from clone RP4-747L4 on chromosome 1q23-24, complete sequence	AL009051	106319	17	17	14	2	19	52242	52225	0
Serum_replicated	tRF-19-DRXSE5I2	19	Homo sapiens chromosome 17, clone RP11-323N12, complete sequence	AC022966	184139	14	14	14	2	15	69397	69384	0
Serum_replicated	tRF-19-DRXSE5I2	19	Homo sapiens 12 BAC RP11-718L23 (Roswell Park Cancer Institute Human BAC Library) complete sequence	AC008055	196753	17	17	14	2	19	188769	188752	0
Serum_replicated	tRF-19-DRXSE5I2	19	Human chromosome 14 DNA sequence BAC R-21A20 of library RPCI-11 from chromosome 14 of Homo sapiens (Human), complete sequence	AL390799	169234	17	17	14	2	19	96478	96461	0
Serum_replicated	tRF-19-DRXSE5I2	19	Homo sapiens neural proliferation, differentiation and control 1 (NPDC1), mRNA	NM_015392	1475	13	13	13	7	19	843	855	0
Serum_replicated	tRF-19-DRXSE5I2	19	Homo sapiens isolate CAP256-59-011804-334 anti-HIV-1 immunoglobulin light chain variable region gene, partial cds	MH408861	522	13	13	13	3	15	482	470	0
Serum_replicated	tRF-19-DRXSE5I2	19	Homo sapiens isolate CAP256-48-019627-334 anti-HIV-1 immunoglobulin light chain variable region gene, partial cds	MH408155	545	13	13	13	3	15	505	493	0
Serum_replicated	tRF-19-DRXSE5I2	19	Homo sapiens isolate CAP256-59-016942-334 anti-HIV-1 immunoglobulin light chain variable region gene, partial cds	MH407842	545	13	13	13	3	15	505	493	0
Serum_replicated	tRF-19-DRXSE5I2	19	Homo sapiens SATB homeobox 2 (SATB2), RefSeqGene on chromosome 2	NG_016976	208767	13	13	13	3	15	8669	8681	0
Serum_replicated	tRF-19-DRXSE5I2	19	Homo sapiens contactin associated protein 2 (CNTNAP2), RefSeqGene on chromosome 7	NG_007092	2309998	13	13	13	1	13	2146456	2146444	0
Serum_replicated	tRF-19-DRXSE5I2	19	Homo sapiens chromosome 5 clone CH17-265L9, complete sequence	AC277776	206878	13	13	13	2	14	144803	144815	0
Serum_replicated	tRF-19-DRXSE5I2	19	Homo sapiens HD gene, complete sequence	AH003045	20909	13	13	13	2	14	12951	12963	0
Serum_replicated	tRF-19-DRXSE5I2	19	Homo sapiens NLR family member X1 (NLRX1), RefSeqGene on chromosome 11	NG_047185	22683	13	13	13	4	16	15768	15756	0
Serum_replicated	tRF-19-DRXSE5I2	19	Homo sapiens ubiquitin specific peptidase 7 (USP7), RefSeqGene on chromosome 16	NG_046847	78391	13	13	13	1	13	59558	59570	0
Serum_replicated	tRF-19-DRXSE5I2	19	Homo sapiens chromosome 4 clone CH17-144M16, complete sequence	AC255484	208409	13	13	13	7	19	5969	5957	0
Serum_replicated	tRF-19-DRXSE5I2	19	Homo sapiens clone 84 immunoglobulin heavy chain variable region gene, partial cds	KF285726	310	13	13	13	4	16	287	299	0
Serum_replicated	tRF-19-DRXSE5I2	19	Homo sapiens isolate CHM13 chromosome 18	CP068260	80542538	13	13	13	7	19	34383638	34383650	0
Serum_replicated	tRF-19-DRXSE5I2	19	Homo sapiens isolate CHM13 chromosome 18	CP068260	80542538	13	13	13	1	13	47656052	47656040	0
Serum_replicated	tRF-19-DRXSE5I2	19	Homo sapiens isolate CHM13 chromosome 18	CP068260	80542538	15	15	12	2	17	2221600	2221615	0
Serum_replicated	tRF-19-DRXSE5I2	19	Homo sapiens isolate CHM13 chromosome 18	CP068260	80542538	12	12	12	3	14	54329224	54329213	0
Serum_replicated	tRF-19-DRXSE5I2	19	Homo sapiens isolate CHM13 chromosome 18	CP068260	80542538	12	12	12	1	12	67278976	67278965	0
Serum_replicated	tRF-19-DRXSE5I2	19	Homo sapiens isolate CHM13 chromosome 16	CP068262	96330374	13	13	13	1	13	8941673	8941661	0
Serum_replicated	tRF-19-DRXSE5I2	19	Homo sapiens isolate CHM13 chromosome 16	CP068262	96330374	12	12	12	1	12	7754633	7754644	0
Serum_replicated	tRF-19-DRXSE5I2	19	Homo sapiens isolate CHM13 chromosome 16	CP068262	96330374	12	12	12	3	14	17183537	17183548	0
Serum_replicated	tRF-19-DRXSE5I2	19	Homo sapiens isolate CHM13 chromosome 16	CP068262	96330374	12	12	12	1	12	33862413	33862424	0
Serum_replicated	tRF-19-DRXSE5I2	19	Homo sapiens isolate CHM13 chromosome 16	CP068262	96330374	12	12	12	1	12	35257996	35258007	0
Serum_replicated	tRF-19-DRXSE5I2	19	Homo sapiens isolate CHM13 chromosome 16	CP068262	96330374	12	12	12	1	12	57732284	57732295	0
Serum_replicated	tRF-19-DRXSE5I2	19	Homo sapiens isolate CHM13 chromosome 16	CP068262	96330374	12	12	12	2	13	90624338	90624349	0
Serum_replicated	tRF-19-DRXSE5I2	19	Homo sapiens isolate CHM13 chromosome 16	CP068262	96330374	12	12	12	4	15	689829	689818	0
Serum_replicated	tRF-19-DRXSE5I2	19	Homo sapiens isolate CHM13 chromosome 16	CP068262	96330374	12	12	12	1	12	9584021	9584010	0
Serum_replicated	tRF-19-DRXSE5I2	19	Homo sapiens DNA, chromosome 18, nearly complete genome	AP023478	77846715	13	13	13	7	19	31604602	31604614	0
Serum_replicated	tRF-19-DRXSE5I2	19	Homo sapiens DNA, chromosome 18, nearly complete genome	AP023478	77846715	13	13	13	1	13	44920588	44920576	0
Serum_replicated	tRF-19-DRXSE5I2	19	Homo sapiens DNA, chromosome 18, nearly complete genome	AP023478	77846715	15	15	12	2	17	2075898	2075913	0
Serum_replicated	tRF-19-DRXSE5I2	19	Homo sapiens DNA, chromosome 18, nearly complete genome	AP023478	77846715	12	12	12	3	14	13126608	13126619	0
Serum_replicated	tRF-19-DRXSE5I2	19	Homo sapiens DNA, chromosome 18, nearly complete genome	AP023478	77846715	12	12	12	3	14	51586660	51586649	0
Serum_replicated	tRF-19-DRXSE5I2	19	Homo sapiens DNA, chromosome 16, nearly complete genome	AP023476	94690957	13	13	13	1	13	8986519	8986507	0
Serum_replicated	tRF-19-DRXSE5I2	19	Homo sapiens DNA, chromosome 16, nearly complete genome	AP023476	94690957	12	12	12	1	12	7796848	7796859	0
Serum_replicated	tRF-19-DRXSE5I2	19	Homo sapiens DNA, chromosome 16, nearly complete genome	AP023476	94690957	12	12	12	3	14	16375728	16375739	0
Serum_replicated	tRF-19-DRXSE5I2	19	Homo sapiens DNA, chromosome 16, nearly complete genome	AP023476	94690957	12	12	12	1	12	56331013	56331024	0
Serum_replicated	tRF-19-DRXSE5I2	19	Homo sapiens DNA, chromosome 16, nearly complete genome	AP023476	94690957	12	12	12	2	13	89094378	89094389	0
Serum_replicated	tRF-19-DRXSE5I2	19	Homo sapiens DNA, chromosome 16, nearly complete genome	AP023476	94690957	12	12	12	4	15	676286	676275	0
Serum_replicated	tRF-19-DRXSE5I2	19	Homo sapiens DNA, chromosome 16, nearly complete genome	AP023476	94690957	12	12	12	1	12	9628757	9628746	0
Serum_replicated	tRF-19-DRXSE5I2	19	Homo sapiens ADAM metallopeptidase domain 12 (ADAM12), RefSeqGene on chromosome 10	NG_029050	381230	13	13	13	2	14	284755	284743	0
Serum_replicated	tRF-19-DRXSE5I2	19	Homo sapiens FOSMID clone ABC24-1766L15 from chromosome 5, complete sequence	AC238705	37415	13	13	13	2	14	26171	26183	0
Serum_replicated	tRF-19-DRXSE5I2	19	Homo sapiens huntingtin (HTT), RefSeqGene (LRG_763) on chromosome 4	NG_009378	176286	13	13	13	2	14	137012	137024	0
Serum_replicated	tRF-19-DRXSE5I2	19	Homo sapiens partial IGHV3-15 gene for immunoglobulin heavy chain variable region, clone 55-9, individual Tonsil D	FM207014	348	13	13	13	5	17	176	188	0
Serum_replicated	tRF-19-DRXSE5I2	19	Homo sapiens FOSMID clone ABC10-841121B4 from chromosome unknown, complete sequence	AC229900	41967	13	13	13	7	19	5213	5201	0
Serum_replicated	tRF-19-DRXSE5I2	19	Homo sapiens phosphotriesterase-related protein (PTER) gene, complete cds, alternatively spliced	EF445015	82766	13	13	13	1	13	50226	50214	0
Serum_replicated	tRF-19-DRXSE5I2	19	Homo sapiens PDZ domain-containing protein 2 (PDZD3) gene, complete cds, alternatively spliced	EF445006	15706	13	13	13	4	16	1584	1572	0
Serum_replicated	tRF-19-DRXSE5I2	19	Homo sapiens mRNA for Neural proliferation differentiation and control protein 1 precursor variant, clone: CAS08969	AK225091	1339	13	13	13	7	19	696	708	0
Serum_replicated	tRF-19-DRXSE5I2	19	Human DNA sequence from clone RP11-399E10 on chromosome 4, complete sequence	AL390059	200379	13	13	13	2	14	64935	64923	0
Serum_replicated	tRF-19-DRXSE5I2	19	Human DNA sequence from clone RP11-229P13 on chromosome 9, complete sequence	AL807752	158699	13	13	13	7	19	110529	110517	0
Serum_replicated	tRF-19-DRXSE5I2	19	Homo sapiens chromosome 10 clone RP11-153O5, complete sequence	AC022015	135198	13	13	13	2	14	39980	39992	0
Serum_replicated	tRF-19-DRXSE5I2	19	Homo sapiens chromosome 10 clone RP11-159H3, complete sequence	AC024599	173391	13	13	13	1	13	92729	92741	0
Serum_replicated	tRF-19-DRXSE5I2	19	Homo sapiens BAC clone RP11-254A24 from 4, complete sequence	AC110774	121016	13	13	13	1	13	13386	13398	0
Serum_replicated	tRF-19-DRXSE5I2	19	Homo sapiens chromosome 18, clone RP11-379L18, complete sequence	AC104985	172187	13	13	13	7	19	108066	108078	0
Serum_replicated	tRF-19-DRXSE5I2	19	Homo sapiens chromosome 18, clone RP11-157P23, complete sequence	AC102797	179632	13	13	13	1	13	85043	85031	0
Serum_replicated	tRF-19-DRXSE5I2	19	Homo sapiens chromosome 16 clone RP11-77H9, complete sequence	AC022167	180705	13	13	13	1	13	118232	118244	0
Serum_replicated	tRF-19-DRXSE5I2	19	Homo sapiens BAC clone CTD-2285E13 from 4, complete sequence	AC131944	44473	13	13	13	7	19	10748	10760	0
Serum_replicated	tRF-19-DRXSE5I2	19	Homo sapiens DNA, chromosome 22, nearly complete genome	AP023482	46684173	12	12	12	2	13	42758055	42758066	0
Serum_replicated	tRF-19-DRXSE5I2	19	Homo sapiens DNA, chromosome 22, nearly complete genome	AP023482	46684173	12	12	12	2	13	25995481	25995470	0
Serum_replicated	tRF-19-DRXSE5I2	19	Homo sapiens DNA, chromosome 22, nearly complete genome	AP023482	46684173	12	12	12	2	13	46411011	46411000	0
Serum_replicated	tRF-19-DRXSE5I2	19	Homo sapiens DNA, chromosome 20, nearly complete genome	AP023480	62398354	12	12	12	2	13	4567866	4567877	0
Serum_replicated	tRF-19-DRXSE5I2	19	Homo sapiens DNA, chromosome 20, nearly complete genome	AP023480	62398354	12	12	12	1	12	45420632	45420643	0
Serum_replicated	tRF-19-DRXSE5I2	19	Homo sapiens DNA, chromosome 20, nearly complete genome	AP023480	62398354	12	12	12	4	15	33519557	33519546	0
Serum_replicated	tRF-19-DRXSE5I2	19	Homo sapiens DNA, chromosome 19, nearly complete genome	AP023479	59105444	12	12	12	2	13	22801178	22801189	0
Serum_replicated	tRF-19-DRXSE5I2	19	Homo sapiens DNA, chromosome 19, nearly complete genome	AP023479	59105444	12	12	12	2	13	33448561	33448572	0
Serum_replicated	tRF-19-DRXSE5I2	19	Homo sapiens DNA, chromosome 19, nearly complete genome	AP023479	59105444	12	12	12	5	16	37634080	37634091	0
Serum_replicated	tRF-19-DRXSE5I2	19	Homo sapiens DNA, chromosome 19, nearly complete genome	AP023479	59105444	12	12	12	2	13	40765875	40765886	0
Serum_replicated	tRF-19-DRXSE5I2	19	Homo sapiens DNA, chromosome 19, nearly complete genome	AP023479	59105444	12	12	12	3	14	38152084	38152073	0
Serum_replicated	tRF-19-DRXSE5I2	19	Homo sapiens DNA, chromosome 19, nearly complete genome	AP023479	59105444	12	12	12	1	12	50108736	50108725	0
Serum_replicated	tRF-19-DRXSE5I2	19	Homo sapiens DNA, chromosome 15, nearly complete genome	AP023475	95537968	12	12	12	2	13	66973297	66973308	0
Serum_replicated	tRF-19-DRXSE5I2	19	Homo sapiens DNA, chromosome 15, nearly complete genome	AP023475	95537968	12	12	12	4	15	68596925	68596914	0
Serum_replicated	tRF-19-DRXSE5I2	19	Homo sapiens DNA, chromosome 15, nearly complete genome	AP023475	95537968	12	12	12	4	15	75475805	75475794	0
Serum_replicated	tRF-19-DRXSE5I2	19	Homo sapiens DNA, chromosome 15, nearly complete genome	AP023475	95537968	12	12	12	4	15	81625723	81625712	0
Serum_replicated	tRF-19-DRXSE5I2	19	Homo sapiens DNA, chromosome Y, nearly complete genome	AP023484	50294361	12	12	12	2	13	14642595	14642584	0
Serum_replicated	tRF-19-DRXSE5I2	19	Homo sapiens DNA, chromosome 21, nearly complete genome	AP023481	44550604	12	12	12	2	13	34665606	34665595	0
Serum_replicated	tRF-29-KY7SHRRNWJE2	29	Bombyx mori major Phe-tRNA >gi|173964|gb|K00353.1|BOVTRF2 Bovine Phe-tRNA-2 >gi|174920|gb|K00350.1|HUMTRF Human Phe-tRNA >gi|175414|gb|K02684.1|MUSTRF Mouse Phe-tRNA >gi|175415|gb|K02685.1|MUSTRFTA Mouse Erlich ascites tumor-specific Phe-tRNA >gi|175416|gb|K02686.1|MUSTRFTB Mouse neuroblastoma tumor-specific Phe-tRNA >gi|175759|gb|K00351.1|RABTRF Rabbit Phe-tRNA >gi|176346|gb|K02849.1|XELTRF X.le…	K00350	76	29	29	29	1	29	48	76	0
Serum_replicated	tRF-29-KY7SHRRNWJE2	29	Homo sapiens piRNA piR-43773, complete sequence	DQ575661	29	28	28	28	1	28	2	29	0
Serum_replicated	tRF-29-KY7SHRRNWJE2	29	Homo sapiens P300/CBP strongly-dependent group 1 enhancer GRCh37_chr12:125412388-125413587 (LOC126861671) on chromosome 12	NG_086169	1400	27	27	27	1	27	127	101	0
Serum_replicated	tRF-29-KY7SHRRNWJE2	29	Homo sapiens 12 BAC RP11-549I9 (Roswell Park Cancer Institute Human BAC Library) complete sequence	AC093719	79925	27	27	27	1	27	79698	79724	0
Serum_replicated	tRF-29-KY7SHRRNWJE2	29	Homo sapiens 12 BAC RP11-592O2 (Roswell Park Cancer Institute Human BAC Library) complete sequence	AC126309	121984	27	27	27	1	27	120205	120179	0
Serum_replicated	tRF-29-KY7SHRRNWJE2	29	H.sapiens CpG island DNA genomic Mse1 fragment, clone 187a11, reverse read cpg187a11.rt1a	Z57612	294	27	27	27	1	27	239	265	0
Serum_replicated	tRF-29-KY7SHRRNWJE2	29	H.sapiens CpG island DNA genomic Mse1 fragment, clone 133g8, reverse read cpg133g8.rt1a	Z54557	293	27	27	27	1	27	118	92	0
Serum_replicated	tRF-29-KY7SHRRNWJE2	29	Homo sapiens cell line MHC_SSTO major histocompatibility complex genomic sequence	OK649236	5046869	26	26	26	1	26	282529	282504	0
Serum_replicated	tRF-29-KY7SHRRNWJE2	29	Homo sapiens cell line MHC_SSTO major histocompatibility complex genomic sequence	OK649236	5046869	26	26	26	1	26	473670	473645	0
Serum_replicated	tRF-29-KY7SHRRNWJE2	29	Homo sapiens cell line MHC_SSTO major histocompatibility complex genomic sequence	OK649236	5046869	22	22	22	1	22	256237	256258	0
Serum_replicated	tRF-29-KY7SHRRNWJE2	29	Homo sapiens cell line MHC_SSTO major histocompatibility complex genomic sequence	OK649236	5046869	25	25	22	1	26	299551	299526	0
Serum_replicated	tRF-29-KY7SHRRNWJE2	29	Homo sapiens cell line MHC_SSTO major histocompatibility complex genomic sequence	OK649236	5046869	25	25	22	1	26	315033	315008	0
Serum_replicated	tRF-29-KY7SHRRNWJE2	29	Homo sapiens cell line MHC_QBL major histocompatibility complex genomic sequence	OK649235	4904957	26	26	26	1	26	282834	282809	0
Serum_replicated	tRF-29-KY7SHRRNWJE2	29	Homo sapiens cell line MHC_QBL major histocompatibility complex genomic sequence	OK649235	4904957	26	26	26	1	26	473772	473747	0
Serum_replicated	tRF-29-KY7SHRRNWJE2	29	Homo sapiens cell line MHC_QBL major histocompatibility complex genomic sequence	OK649235	4904957	22	22	22	1	22	256515	256536	0
Serum_replicated	tRF-29-KY7SHRRNWJE2	29	Homo sapiens cell line MHC_QBL major histocompatibility complex genomic sequence	OK649235	4904957	25	25	22	1	26	299930	299905	0
Serum_replicated	tRF-29-KY7SHRRNWJE2	29	Homo sapiens cell line MHC_QBL major histocompatibility complex genomic sequence	OK649235	4904957	25	25	22	1	26	315415	315390	0
Serum_replicated	tRF-29-KY7SHRRNWJE2	29	Homo sapiens cell line MHC_MANN major histocompatibility complex genomic sequence	OK649234	5025632	26	26	26	1	26	283057	283032	0
Serum_replicated	tRF-29-KY7SHRRNWJE2	29	Homo sapiens cell line MHC_MANN major histocompatibility complex genomic sequence	OK649234	5025632	26	26	26	1	26	474011	473986	0
Serum_replicated	tRF-29-KY7SHRRNWJE2	29	Homo sapiens cell line MHC_MANN major histocompatibility complex genomic sequence	OK649234	5025632	22	22	22	1	22	256744	256765	0
Serum_replicated	tRF-29-KY7SHRRNWJE2	29	Homo sapiens cell line MHC_MANN major histocompatibility complex genomic sequence	OK649234	5025632	25	25	22	1	26	300165	300140	0
Serum_replicated	tRF-29-KY7SHRRNWJE2	29	Homo sapiens cell line MHC_MANN major histocompatibility complex genomic sequence	OK649234	5025632	25	25	22	1	26	315649	315624	0
Serum_replicated	tRF-29-KY7SHRRNWJE2	29	Homo sapiens cell line MHC_KAS116 major histocompatibility complex genomic sequence	OK649233	4911494	26	26	26	1	26	282677	282652	0
Serum_replicated	tRF-29-KY7SHRRNWJE2	29	Homo sapiens cell line MHC_KAS116 major histocompatibility complex genomic sequence	OK649233	4911494	26	26	26	1	26	473931	473906	0
Serum_replicated	tRF-29-KY7SHRRNWJE2	29	Homo sapiens cell line MHC_KAS116 major histocompatibility complex genomic sequence	OK649233	4911494	22	22	22	1	22	256364	256385	0
Serum_replicated	tRF-29-KY7SHRRNWJE2	29	Homo sapiens cell line MHC_KAS116 major histocompatibility complex genomic sequence	OK649233	4911494	25	25	22	1	26	299689	299664	0
Serum_replicated	tRF-29-KY7SHRRNWJE2	29	Homo sapiens cell line MHC_KAS116 major histocompatibility complex genomic sequence	OK649233	4911494	25	25	22	1	26	315187	315162	0
Serum_replicated	tRF-29-KY7SHRRNWJE2	29	Homo sapiens cell line MHC_DBB major histocompatibility complex genomic sequence	OK649232	5048538	26	26	26	1	26	282973	282948	0
Serum_replicated	tRF-29-KY7SHRRNWJE2	29	Homo sapiens cell line MHC_DBB major histocompatibility complex genomic sequence	OK649232	5048538	26	26	26	1	26	473888	473863	0
Serum_replicated	tRF-29-KY7SHRRNWJE2	29	Homo sapiens cell line MHC_DBB major histocompatibility complex genomic sequence	OK649232	5048538	22	22	22	1	22	256683	256704	0
Serum_replicated	tRF-29-KY7SHRRNWJE2	29	Homo sapiens cell line MHC_DBB major histocompatibility complex genomic sequence	OK649232	5048538	25	25	22	1	26	300075	300050	0
Serum_replicated	tRF-29-KY7SHRRNWJE2	29	Homo sapiens cell line MHC_DBB major histocompatibility complex genomic sequence	OK649232	5048538	25	25	22	1	26	315558	315533	0
Serum_replicated	tRF-29-KY7SHRRNWJE2	29	Homo sapiens cell line MHC_APD major histocompatibility complex genomic sequence	OK649231	4929193	26	26	26	1	26	282879	282854	0
Serum_replicated	tRF-29-KY7SHRRNWJE2	29	Homo sapiens cell line MHC_APD major histocompatibility complex genomic sequence	OK649231	4929193	26	26	26	1	26	473888	473863	0
Serum_replicated	tRF-29-KY7SHRRNWJE2	29	Homo sapiens cell line MHC_APD major histocompatibility complex genomic sequence	OK649231	4929193	22	22	22	1	22	256561	256582	0
Serum_replicated	tRF-29-KY7SHRRNWJE2	29	Homo sapiens cell line MHC_APD major histocompatibility complex genomic sequence	OK649231	4929193	25	25	22	1	26	299985	299960	0
Serum_replicated	tRF-29-KY7SHRRNWJE2	29	Homo sapiens cell line MHC_APD major histocompatibility complex genomic sequence	OK649231	4929193	25	25	22	1	26	315472	315447	0
Serum_replicated	tRF-29-KY7SHRRNWJE2	29	PREDICTED: Homo sapiens uncharacterized LOC124903191 (LOC124903191), transcript variant X2, ncRNA	XR_007063836	2634	26	26	26	1	26	928	903	0
Serum_replicated	tRF-29-KY7SHRRNWJE2	29	TPA: Homo sapiens tRNA-Phe-GAA-1-3 gene >gi|634722242|tpe|HG983961.1| TPA: Homo sapiens tRNA-Phe-GAA-1-4 gene >gi|634722244|tpe|HG983962.1| TPA: Homo sapiens tRNA-Phe-GAA-1-5 gene >gi|634722246|tpe|HG983963.1| TPA: Homo sapiens tRNA-Phe-GAA-1-6 gene >gi|634722248|tpe|HG983964.1| TPA: Homo sapiens tRNA-Phe-GAA-1-1 gene >gi|634722250|tpe|HG983965.1| TPA: Homo sapiens tRNA-Phe-GAA-1-2 gene >gi|63472…	HG983960	73	26	26	26	1	26	48	73	0
Serum_replicated	tRF-29-KY7SHRRNWJE2	29	Homo sapiens isolate CHM13 chromosome 19	CP068259	61707364	26	26	26	1	26	1353384	1353359	0
Serum_replicated	tRF-29-KY7SHRRNWJE2	29	Homo sapiens isolate CHM13 chromosome 19	CP068259	61707364	18	18	15	11	29	12358925	12358943	0
Serum_replicated	tRF-29-KY7SHRRNWJE2	29	Homo sapiens isolate CHM13 chromosome 19	CP068259	61707364	14	14	14	5	18	4708979	4708966	0
Serum_replicated	tRF-29-KY7SHRRNWJE2	29	Homo sapiens isolate CHM13 chromosome 19	CP068259	61707364	14	14	14	4	17	4739300	4739313	0
Serum_replicated	tRF-29-KY7SHRRNWJE2	29	Homo sapiens isolate CHM13 chromosome 19	CP068259	61707364	14	14	14	5	18	44748005	44748018	0
Serum_replicated	tRF-29-KY7SHRRNWJE2	29	Homo sapiens DNA, chromosome 19, nearly complete genome	AP023479	59105444	26	26	26	1	26	1238557	1238532	0
Serum_replicated	tRF-29-KY7SHRRNWJE2	29	Homo sapiens DNA, chromosome 19, nearly complete genome	AP023479	59105444	18	18	15	11	29	12117049	12117067	0
Serum_replicated	tRF-29-KY7SHRRNWJE2	29	Homo sapiens DNA, chromosome 19, nearly complete genome	AP023479	59105444	14	14	14	5	18	4587671	4587658	0
Serum_replicated	tRF-29-KY7SHRRNWJE2	29	Homo sapiens DNA, chromosome 19, nearly complete genome	AP023479	59105444	14	14	14	4	17	4618022	4618035	0
Serum_replicated	tRF-29-KY7SHRRNWJE2	29	Homo sapiens DNA, chromosome 19, nearly complete genome	AP023479	59105444	14	14	14	5	18	42087986	42087999	0
Serum_replicated	tRF-29-KY7SHRRNWJE2	29	Homo sapiens NADH:ubiquinone oxidoreductase core subunit S7 (NDUFS7), RefSeqGene on chromosome 19; nuclear gene for mitochondrial product	NG_008283	18706	26	26	26	1	26	4504	4479	0
Serum_replicated	tRF-29-KY7SHRRNWJE2	29	Human DNA sequence from clone DAAP-101P24 on chromosome 6, complete sequence	CR759954	94061	26	26	26	1	26	15602	15577	0
Serum_replicated	tRF-29-KY7SHRRNWJE2	29	Human DNA sequence from clone DAAP-101P24 on chromosome 6, complete sequence	CR759954	94061	25	25	22	1	26	32707	32682	0
Serum_replicated	tRF-29-KY7SHRRNWJE2	29	Human DNA sequence from clone DAAP-101P24 on chromosome 6, complete sequence	CR759954	94061	25	25	22	1	26	48190	48165	0
Serum_replicated	tRF-29-KY7SHRRNWJE2	29	Human DNA sequence from clone DADB-91F17 on chromosome 6, complete sequence	CR753651	124464	26	26	26	1	26	48334	48309	0
Serum_replicated	tRF-29-KY7SHRRNWJE2	29	Human DNA sequence from clone DADB-91F17 on chromosome 6, complete sequence	CR753651	124464	22	22	22	1	22	22028	22049	0
Serum_replicated	tRF-29-KY7SHRRNWJE2	29	Human DNA sequence from clone DADB-91F17 on chromosome 6, complete sequence	CR753651	124464	25	25	22	1	26	65454	65429	0
Serum_replicated	tRF-29-KY7SHRRNWJE2	29	Human DNA sequence from clone DADB-91F17 on chromosome 6, complete sequence	CR753651	124464	25	25	22	1	26	80937	80912	0
Serum_replicated	tRF-29-KY7SHRRNWJE2	29	Human DNA sequence from clone DASS-263B11 on chromosome 6, complete sequence	BX470194	43833	26	26	26	1	26	1196	1171	0
Serum_replicated	tRF-29-KY7SHRRNWJE2	29	Human DNA sequence from clone DASS-263B11 on chromosome 6, complete sequence	BX470194	43833	25	25	22	1	26	18219	18194	0
Serum_replicated	tRF-29-KY7SHRRNWJE2	29	Human DNA sequence from clone DASS-263B11 on chromosome 6, complete sequence	BX470194	43833	25	25	22	1	26	33700	33675	0
Serum_replicated	tRF-29-KY7SHRRNWJE2	29	Human DNA sequence from clone DASS-381E5 on chromosome 6, complete sequence	BX248109	52611	26	26	26	1	26	43289	43264	0
Serum_replicated	tRF-29-KY7SHRRNWJE2	29	Human DNA sequence from clone DASS-179P20 on chromosome 6, complete sequence	BX088523	87597	26	26	26	1	26	86793	86768	0
Serum_replicated	tRF-29-KY7SHRRNWJE2	29	Human DNA sequence from clone DASS-179P20 on chromosome 6, complete sequence	BX088523	87597	22	22	22	1	22	60514	60535	0
Serum_replicated	tRF-29-KY7SHRRNWJE2	29	Human DNA sequence from clone DAQB-239N17 on chromosome 6, complete sequence	AL844539	98145	26	26	26	1	26	15881	15856	0
Serum_replicated	tRF-29-KY7SHRRNWJE2	29	Human DNA sequence from clone DAQB-239N17 on chromosome 6, complete sequence	AL844539	98145	25	25	22	1	26	32984	32959	0
Serum_replicated	tRF-29-KY7SHRRNWJE2	29	Human DNA sequence from clone DAQB-239N17 on chromosome 6, complete sequence	AL844539	98145	25	25	22	1	26	48467	48442	0
Serum_replicated	tRF-29-KY7SHRRNWJE2	29	Human DNA sequence from clone DAQB-117O11 on chromosome 6, complete sequence	AL929561	181111	26	26	26	1	26	18613	18588	0
Serum_replicated	tRF-29-KY7SHRRNWJE2	29	Human DNA sequence from clone CH502-419D21 on chromosome 6, complete sequence	AL901607	58752	26	26	26	1	26	43055	43030	0
Serum_replicated	tRF-29-KY7SHRRNWJE2	29	Human DNA sequence from clone CH502-419D21 on chromosome 6, complete sequence	AL901607	58752	22	22	22	1	22	16746	16767	0
Serum_replicated	tRF-29-KY7SHRRNWJE2	29	Human DNA sequence from clone CH501-308K3 on chromosome 6, complete sequence	AL662890	137288	26	26	26	1	26	61925	61900	0
Serum_replicated	tRF-29-KY7SHRRNWJE2	29	Human DNA sequence from clone CH501-308K3 on chromosome 6, complete sequence	AL662890	137288	22	22	22	1	22	35612	35633	0
Serum_replicated	tRF-29-KY7SHRRNWJE2	29	Human DNA sequence from clone CH501-308K3 on chromosome 6, complete sequence	AL662890	137288	25	25	22	1	26	79036	79011	0
Serum_replicated	tRF-29-KY7SHRRNWJE2	29	Human DNA sequence from clone CH501-308K3 on chromosome 6, complete sequence	AL662890	137288	25	25	22	1	26	94519	94494	0
Serum_replicated	tRF-29-KY7SHRRNWJE2	29	Human DNA sequence from clone CH502-216M5 on chromosome 6, complete sequence	AL662865	133757	26	26	26	1	26	52299	52274	0
Serum_replicated	tRF-29-KY7SHRRNWJE2	29	Human DNA sequence from clone CH501-258E24 on chromosome 6, complete sequence	AL662791	134463	26	26	26	1	26	16429	16404	0
Serum_replicated	tRF-29-KY7SHRRNWJE2	29	Human DNA sequence from clone RP1-25J6 on chromosome 6p21.3 Contains the 5' end of the RFP gene for ret finger protein, a putative novel gene, a KRT18 (keratin 18) pseudogene, a novel zinc finger protein gene, olfactory receptor 2AD1 pseudogene OR2AD1P, ESTs, STSs and 3 CpG islands, complete sequence	Z84476	112659	26	26	26	1	26	62697	62672	0
Serum_replicated	tRF-29-KY7SHRRNWJE2	29	Human DNA sequence from clone RP11-124B17 on chromosome 13, complete sequence	AL139318	160004	26	26	26	1	26	123013	122988	0
Serum_replicated	tRF-29-KY7SHRRNWJE2	29	Human DNA sequence from clone RP1-207F6 on chromosome 6 Contains the 3' end of the gene for a novel nucleolar protein NOP56 like protein, ESTs, STSs and GSSs, complete sequence	AL133258	73666	26	26	26	1	26	56458	56433	0
Serum_replicated	tRF-29-KY7SHRRNWJE2	29	Human DNA sequence from clone RP1-207F6 on chromosome 6 Contains the 3' end of the gene for a novel nucleolar protein NOP56 like protein, ESTs, STSs and GSSs, complete sequence	AL133258	73666	22	22	22	1	22	30138	30159	0
Serum_replicated	tRF-29-KY7SHRRNWJE2	29	Human DNA sequence from clone RP1-207F6 on chromosome 6 Contains the 3' end of the gene for a novel nucleolar protein NOP56 like protein, ESTs, STSs and GSSs, complete sequence	AL133258	73666	25	25	22	1	26	73559	73534	0
Serum_replicated	tRF-29-KY7SHRRNWJE2	29	Human DNA sequence from clone DADB-29N8 on chromosome 6, complete sequence	CR759835	75398	26	26	26	1	26	6925	6900	0
Serum_replicated	tRF-29-KY7SHRRNWJE2	29	Human DNA sequence from clone DAAP-223O5 on chromosome 6, complete sequence	CR759957	75014	26	26	26	1	26	816	791	0
Serum_replicated	tRF-29-KY7SHRRNWJE2	29	Human DNA sequence from clone DAMA-52D19 on chromosome 6, complete sequence	BX927167	124344	26	26	26	1	26	44036	44011	0
Serum_replicated	tRF-29-KY7SHRRNWJE2	29	Human DNA sequence from clone DAMA-184I15 on chromosome 6, complete sequence	BX908720	132528	26	26	26	1	26	48620	48595	0
Serum_replicated	tRF-29-KY7SHRRNWJE2	29	Human DNA sequence from clone DAMA-184I15 on chromosome 6, complete sequence	BX908720	132528	22	22	22	1	22	22303	22324	0
Serum_replicated	tRF-29-KY7SHRRNWJE2	29	Human DNA sequence from clone DAMA-184I15 on chromosome 6, complete sequence	BX908720	132528	25	25	22	1	26	65721	65696	0
Serum_replicated	tRF-29-KY7SHRRNWJE2	29	Human DNA sequence from clone DAMA-184I15 on chromosome 6, complete sequence	BX908720	132528	25	25	22	1	26	81201	81176	0
Serum_replicated	tRF-29-KY7SHRRNWJE2	29	Homo sapiens, clone IMAGE:4294479, mRNA	BC026095	2212	26	26	26	1	26	1968	1943	0
Serum_replicated	tRF-29-KY7SHRRNWJE2	29	Homo sapiens genomic DNA, chromosome 11q clone:RP11-384C21, complete sequences	AP003778	183146	26	26	26	1	26	179646	179621	0
Serum_replicated	tRF-29-KY7SHRRNWJE2	29	Homo sapiens chromosome 19, cosmid R34382, complete sequence	AC005329	34875	26	26	26	1	26	6996	6971	0
Serum_replicated	tRF-29-KY7SHRRNWJE2	29	Human Phe-tRNA and Lys-tRNA genes and Alu repeat, 5' end	M17620	2247	26	26	26	1	26	243	268	0
Serum_replicated	tRF-29-KY7SHRRNWJE2	29	Homo sapiens chromosome 8, clone CTD-2017M22, complete sequence	AC093566	177522	28	28	25	1	29	78770	78742	0
Serum_replicated	tRF-29-KY7SHRRNWJE2	29	H.sapiens CpG island DNA genomic Mse1 fragment, clone 187a12, forward read cpg187a12.ft1a	Z57613	243	26	26	24	1	27	120	94	0
Serum_replicated	tRF-29-KY7SHRRNWJE2	29	Homo sapiens H3K27ac hESC enhancer GRCh37_chr11:59333399-59333898 (LOC127821125) on chromosome 11	NG_122582	700	25	25	22	1	26	580	555	0
Serum_replicated	tRF-29-KY7SHRRNWJE2	29	PREDICTED: Homo sapiens long intergenic non-protein coding RNA 2739 (LINC02739), transcript variant X9, ncRNA	XR_007082138	1492	25	25	22	1	26	621	646	0
Serum_replicated	tRF-29-KY7SHRRNWJE2	29	PREDICTED: Homo sapiens long intergenic non-protein coding RNA 2739 (LINC02739), transcript variant X4, ncRNA	XR_001748232	2359	25	25	22	1	26	621	646	0
Serum_replicated	tRF-29-KY7SHRRNWJE2	29	TPA: Homo sapiens tRNA-Phe-GAA-5-1 gene	HG983969	73	22	22	22	1	22	48	69	0
Serum_replicated	tRF-29-KY7SHRRNWJE2	29	TPA: Homo sapiens tRNA-Phe-GAA-4-1 gene	HG983968	74	25	25	22	1	26	49	74	0
Serum_replicated	tRF-29-KY7SHRRNWJE2	29	TPA: Homo sapiens tRNA-Phe-GAA-3-1 gene	HG983967	73	25	25	22	1	26	48	73	0
Serum_replicated	tRF-29-KY7SHRRNWJE2	29	TPA: Homo sapiens tRNA-Phe-GAA-2-1 gene >gi|634723207|tpe|HG984493.1| TPA: Mus musculus tRNA-Phe-GAA-3-1 gene	HG983966	73	25	25	22	1	26	48	73	0
Serum_replicated	tRF-29-KY7SHRRNWJE2	29	Homo sapiens FOSMID clone ABC12-46839600K23 from chromosome 18, complete sequence	AC209559	33695	25	25	22	1	26	20963	20988	0
Serum_replicated	tRF-29-KY7SHRRNWJE2	29	Human DNA sequence from clone DAMC-338N21 on chromosome 6, complete sequence	CR936879	44479	25	25	22	1	26	3851	3826	0
Serum_replicated	tRF-29-KY7SHRRNWJE2	29	Human DNA sequence from clone CH502-57P4 on chromosome 6, complete sequence	AL669978	63505	25	25	22	1	26	3270	3245	0
Serum_replicated	tRF-29-KY7SHRRNWJE2	29	Human DNA sequence from clone CH502-57P4 on chromosome 6, complete sequence	AL669978	63505	25	25	22	1	26	18754	18729	0
Serum_replicated	tRF-29-KY7SHRRNWJE2	29	Human DNA sequence from clone RP1-111M5 on chromosome 6p21.3 Contains an RPL13 (60S Ribosomal protein L13, BBC1) pseudogene, a zinc finger protein pseudogene, the 3' end of the RFP gene for ret finger protein, four CpG islands, ESTs, STSs and GSSs, complete sequence	Z84474	107526	25	25	22	1	26	15476	15451	0
Serum_replicated	tRF-29-KY7SHRRNWJE2	29	Homo sapiens genomic DNA, chromosome 11q, clone:CMB9-60A24, complete sequence	AP000442	117502	25	25	22	1	26	8020	7995	0
Serum_replicated	tRF-29-KY7SHRRNWJE2	29	Human Phe-tRNA	M17622	625	25	25	22	1	26	311	336	0
Serum_replicated	tRF-29-KY7SHRRNWJE2	29	Homo sapiens nuclear factor, erythroid 4 (NFE4), transcript variant 3, long non-coding RNA	NR_166512	1021	18	18	18	12	29	207	190	0
Serum_replicated	tRF-29-KY7SHRRNWJE2	29	Homo sapiens nuclear factor, erythroid 4 (NFE4), transcript variant 4, long non-coding RNA	NR_166513	969	18	18	18	12	29	207	190	0
Serum_replicated	tRF-29-KY7SHRRNWJE2	29	Homo sapiens nuclear factor, erythroid 4 (NFE4), transcript variant 2, long non-coding RNA	NR_166511	1337	18	18	18	12	29	207	190	0
Serum_replicated	tRF-29-KY7SHRRNWJE2	29	Homo sapiens nuclear factor, erythroid 4 (NFE4), transcript variant 1, long non-coding RNA	NR_166510	1161	18	18	18	12	29	207	190	0
Serum_replicated	tRF-29-KY7SHRRNWJE2	29	Homo sapiens chr5:104590996-104590985 non-reference unique insertion sequence	MH534406	1242	18	18	18	12	29	453	470	0
Serum_replicated	tRF-29-KY7SHRRNWJE2	29	Homo sapiens clone 0746 breakpoint junction genomic sequence	KY504251	3615	18	18	18	12	29	531	548	0
Serum_replicated	tRF-29-KY7SHRRNWJE2	29	Homo sapiens clone 0297 breakpoint junction genomic sequence	KY503802	1445	18	18	18	12	29	523	540	0
Serum_replicated	tRF-29-KY7SHRRNWJE2	29	Homo sapiens clone 0172 breakpoint junction genomic sequence	KY503677	2801	18	18	18	12	29	2271	2254	0
Serum_replicated	tRF-29-KY7SHRRNWJE2	29	Homo sapiens MED14-independent group 3 enhancer GRCh37_chr7:153109801-153111000 (LOC126860233) on chromosome 7	NG_084734	1400	18	18	18	12	29	1174	1191	0
Serum_replicated	tRF-29-KY7SHRRNWJE2	29	Homo sapiens MED14-independent group 3 enhancer GRCh37_chr7:102613398-102614597 (LOC126860129) on chromosome 7	NG_084630	1400	18	18	18	12	29	786	769	0
Serum_replicated	tRF-29-KY7SHRRNWJE2	29	Homo sapiens chromosome 7 clone 174779_ABC12_000047010200_F16, complete sequence	AC255539	38705	18	18	18	12	29	27059	27042	0
Serum_replicated	tRF-29-KY7SHRRNWJE2	29	Homo sapiens testis expressed 16, pseudogene (TEX16P) on chromosome X	NG_023465	44762	18	18	18	12	29	21324	21307	0
Serum_replicated	tRF-29-KY7SHRRNWJE2	29	Homo sapiens isolate CHM13 chromosome 18	CP068260	80542538	24	24	18	1	26	62647104	62647079	0
Serum_replicated	tRF-29-KY7SHRRNWJE2	29	Homo sapiens isolate CHM13 chromosome 18	CP068260	80542538	18	18	15	11	29	61822269	61822251	0
Serum_replicated	tRF-29-KY7SHRRNWJE2	29	Homo sapiens isolate CHM13 chromosome 18	CP068260	80542538	14	14	14	16	29	32191289	32191276	0
Serum_replicated	tRF-29-KY7SHRRNWJE2	29	Homo sapiens isolate CHM13 chromosome 18	CP068260	80542538	17	17	14	12	29	58847461	58847478	0
Serum_replicated	tRF-29-KY7SHRRNWJE2	29	Homo sapiens isolate CHM13 chromosome 18	CP068260	80542538	14	14	14	11	24	80062490	80062503	0
Serum_replicated	tRF-29-KY7SHRRNWJE2	29	Homo sapiens DNA, chromosome 18, nearly complete genome	AP023478	77846715	24	24	18	1	26	59901603	59901578	0
Serum_replicated	tRF-29-KY7SHRRNWJE2	29	Homo sapiens DNA, chromosome 18, nearly complete genome	AP023478	77846715	18	18	15	11	29	59076676	59076658	0
Serum_replicated	tRF-29-KY7SHRRNWJE2	29	Homo sapiens DNA, chromosome 18, nearly complete genome	AP023478	77846715	14	14	14	16	29	29414510	29414497	0
Serum_replicated	tRF-29-KY7SHRRNWJE2	29	Homo sapiens DNA, chromosome 18, nearly complete genome	AP023478	77846715	17	17	14	12	29	56102920	56102937	0
Serum_replicated	tRF-29-KY7SHRRNWJE2	29	Homo sapiens DNA, chromosome 18, nearly complete genome	AP023478	77846715	14	14	14	11	24	77356613	77356626	0
Serum_replicated	tRF-29-KY7SHRRNWJE2	29	Homo sapiens BAC clone RP11-645N11 from 7, complete sequence	AC073127	155842	18	18	18	12	29	49636	49619	0
Serum_replicated	tRF-29-KY7SHRRNWJE2	29	Homo sapiens BAC clone RP11-774B15 from 7, complete sequence	AC073236	171012	18	18	18	12	29	165003	165020	0
Serum_replicated	tRF-29-KY7SHRRNWJE2	29	Homo sapiens cDNA FLJ42291 fis, clone TLIVE2007528	AK124285	2624	18	18	18	12	29	175	158	0
Serum_replicated	tRF-29-KY7SHRRNWJE2	29	Homo sapiens transcription factor NF-E4 mRNA, complete cds	AY258907	966	18	18	18	12	29	200	183	0
Serum_replicated	tRF-29-KY7SHRRNWJE2	29	Homo sapiens, clone IMAGE:5404753, mRNA	BC036938	1096	18	18	18	12	29	126	109	0
Serum_replicated	tRF-29-KY7SHRRNWJE2	29	Homo sapiens chromosome 18, clone RP11-120K19, complete sequence	AC064801	167843	24	24	18	1	26	12238	12213	0
Serum_replicated	tRF-29-KY7SHRRNWJE2	29	Homo sapiens chromosome 18, clone RP11-640A1, complete sequence	AC100843	180160	24	24	18	1	26	12619	12644	0
Serum_replicated	tRF-29-KY7SHRRNWJE2	29	Homo sapiens BAC clone RP11-722P15 from 4, complete sequence	AC096768	180430	18	18	18	12	29	127598	127615	0
Serum_replicated	tRF-29-KY7SHRRNWJE2	29	Human DNA sequence from clone RP1-30P20 on chromosome Xq21.1-21.3, complete sequence	Z95126	176939	18	18	18	12	29	45007	44990	0
Serum_replicated	tRF-29-KY7SHRRNWJE2	29	Homo sapiens chromosome 5 clone CTC-235M3, complete sequence	AC008390	121931	18	18	18	12	29	57219	57236	0
Serum_replicated	tRF-29-KY7SHRRNWJE2	29	Human chromosome 14 DNA sequence BAC C-3059L23 of library CalTech-D from chromosome 14 of Homo sapiens (Human), complete sequence	AL352978	141450	18	18	18	12	29	36795	36778	0
Serum_replicated	tRF-29-KY7SHRRNWJE2	29	Human chromosome 14 DNA sequence BAC C-3059L23 of library CalTech-D from chromosome 14 of Homo sapiens (Human), complete sequence	AL352978	141450	18	18	18	12	29	42948	42931	0
Serum_replicated	tRF-29-KY7SHRRNWJE2	29	Human chromosome 14 DNA sequence BAC C-2273N11 of library CalTech-D from chromosome 14 of Homo sapiens (Human), complete sequence	AL359402	119296	18	18	18	12	29	116306	116289	0
Serum_replicated	tRF-29-KY7SHRRNWJE2	29	H.sapiens CpG island DNA genomic Mse1 fragment, clone 133g8, forward read cpg133g8.ft1a	Z54556	259	18	18	18	1	18	242	259	0
Serum_replicated	tRF-29-KY7SHRRNWJE2	29	Homo sapiens BAC clone RP11-736E3 from 7, complete sequence	AC073346	180651	20	20	17	9	29	170163	170183	0
Serum_replicated	tRF-29-KY7SHRRNWJE2	29	Human DNA sequence from clone RP11-1086F11 on chromosome 1, complete sequence	AL591623	82383	17	17	17	13	29	64052	64068	0
Serum_replicated	tRF-29-KY7SHRRNWJE2	29	Human DNA sequence from clone RP11-225H22 on chromosome 10, complete sequence	AL139339	103826	17	17	17	13	29	99274	99290	0
Serum_replicated	tRF-29-KY7SHRRNWJE2	29	Homo sapiens BAC clone CH17-180E5 from chromosome 11, complete sequence	AC270086	234806	16	16	16	14	29	165899	165884	0
Serum_replicated	tRF-29-KY7SHRRNWJE2	29	Homo sapiens zinc finger protein 195 (ZNF195), RefSeqGene on chromosome 11	NG_032109	28296	16	16	16	14	29	26355	26340	0
Serum_replicated	tRF-29-KY7SHRRNWJE2	29	Homo sapiens FOSMID clone ABC13-47478300F9 from chromosome unknown, complete sequence	AC240967	40422	16	16	16	14	29	4540	4525	0
Serum_replicated	tRF-29-KY7SHRRNWJE2	29	Homo sapiens 3 BAC RP11-64D22 (Roswell Park Cancer Institute Human BAC Library) complete sequence	AC068647	132745	16	16	16	14	29	48671	48656	0
Serum_replicated	tRF-29-KY7SHRRNWJE2	29	Homo sapiens 3 BAC RP11-3F11 (Roswell Park Cancer Institute Human BAC Library) complete sequence	AC116026	90343	16	16	16	14	29	6269	6254	0
Serum_replicated	tRF-29-KY7SHRRNWJE2	29	Human DNA sequence from clone RP3-477M7 on chromosome 1, complete sequence	AL139415	141428	16	16	16	12	27	66671	66656	0
Serum_replicated	tRF-29-KY7SHRRNWJE2	29	Homo sapiens chromosome 11, clone RP5-1173A5, complete sequence	AC123788	133379	16	16	16	14	29	42889	42904	0
Serum_replicated	tRF-29-KY7SHRRNWJE2	29	Human Chromosome 11 pac pDJ1173a5, complete sequence	AC000378	132783	16	16	16	14	29	89888	89873	0
Serum_replicated	tRF-29-KY7SHRRNWJE2	29	Homo sapiens chromosome 1 clone CH17-31M22, complete sequence	AC277864	223117	18	18	15	11	29	75800	75818	0
Serum_replicated	tRF-29-KY7SHRRNWJE2	29	Homo sapiens heparanase 2 (inactive) (HPSE2), RefSeqGene on chromosome 10	NG_023416	865875	18	18	15	11	29	60600	60618	0
Serum_replicated	tRF-29-KY7SHRRNWJE2	29	Homo sapiens isolate CHM13 chromosome 22	CP068256	51324926	15	15	15	1	15	7559373	7559387	0
Serum_replicated	tRF-29-KY7SHRRNWJE2	29	Homo sapiens isolate CHM13 chromosome 21	CP068257	45090682	15	15	15	1	15	6547722	6547708	0
Serum_replicated	tRF-29-KY7SHRRNWJE2	29	Homo sapiens isolate CHM13 chromosome 21	CP068257	45090682	14	14	14	16	29	21995702	21995715	0
Serum_replicated	tRF-29-KY7SHRRNWJE2	29	Homo sapiens isolate CHM13 chromosome 17	CP068261	84276897	15	15	15	14	28	42523591	42523577	0
Serum_replicated	tRF-29-KY7SHRRNWJE2	29	Homo sapiens isolate CHM13 chromosome 17	CP068261	84276897	14	14	14	14	27	21206841	21206828	0
Serum_replicated	tRF-29-KY7SHRRNWJE2	29	Homo sapiens isolate CHM13 chromosome 17	CP068261	84276897	14	14	14	13	26	44859380	44859367	0
Serum_replicated	tRF-29-KY7SHRRNWJE2	29	Homo sapiens isolate CHM13 chromosome 15	CP068263	99753195	15	15	15	1	15	4757825	4757811	0
Serum_replicated	tRF-29-KY7SHRRNWJE2	29	Homo sapiens DNA, chromosome 17, nearly complete genome	AP023477	80688777	15	15	15	14	28	39422260	39422246	0
Serum_replicated	tRF-29-KY7SHRRNWJE2	29	Homo sapiens DNA, chromosome 17, nearly complete genome	AP023477	80688777	14	14	14	14	27	21463773	21463760	0
Serum_replicated	tRF-29-KY7SHRRNWJE2	29	Homo sapiens DNA, chromosome 17, nearly complete genome	AP023477	80688777	14	14	14	13	26	41702903	41702890	0
Serum_replicated	tRF-29-W4R951KHZK1V	29	Homo sapiens clone HIV1-HeLa-37 HIV-1 integration site	AY517281	112	29	29	29	1	29	100	72	0
Serum_replicated	tRF-29-W4R951KHZK1V	29	Homo sapiens chromosome 1 clone VMRC66-037G16, complete sequence	AC278758	147967	28	28	28	1	28	142169	142142	0
Serum_replicated	tRF-29-W4R951KHZK1V	29	Homo sapiens BAC clone CH17-353B19 from chromosome 1, complete sequence	AC239799	247870	28	28	28	1	28	232918	232891	0
Serum_replicated	tRF-29-W4R951KHZK1V	29	Human DNA sequence from clone RP4-634B11 on chromosome 1 Contains the 5' end of the HFE2 gene for hemochromatosis type 2 (juvenile) protein, complete sequence	AL355505	23948	28	28	28	1	28	3970	3943	0
Serum_replicated	tRF-29-W4R951KHZK1V	29	Human chromosome 14 DNA sequence BAC C-2002H8 of library CalTech-D from chromosome 14 of Homo sapiens (Human), complete sequence	AL132989	146740	28	28	28	1	28	35605	35578	0
Serum_replicated	tRF-29-W4R951KHZK1V	29	Homo sapiens chromosome 1 clone VMRC53-364C01, complete sequence	AC278450	165986	28	28	28	1	28	4228	4255	0
Serum_replicated	tRF-29-W4R951KHZK1V	29	Homo sapiens NANOG-H3K27ac-H3K4me1 hESC enhancer GRCh37_chr1:145395462-145396128 (LOC127270192) on chromosome 1	NG_092047	867	28	28	28	1	28	681	708	0
Serum_replicated	tRF-29-W4R951KHZK1V	29	Homo sapiens LHRI_LNC2361.1 lncRNA, complete sequence	MW803856	609	28	28	28	1	28	48	75	0
Serum_replicated	tRF-29-W4R951KHZK1V	29	Human DNA sequence from clone CTA-14H9 on chromosome 6, complete sequence	AL121936	122979	28	28	28	1	28	93957	93984	0
Serum_replicated	tRF-29-W4R951KHZK1V	29	Homo sapiens isolate CHM13 chromosome 16	CP068262	96330374	27	27	27	1	27	3184050	3184024	0
Serum_replicated	tRF-29-W4R951KHZK1V	29	Homo sapiens isolate CHM13 chromosome 16	CP068262	96330374	27	27	27	1	27	3202349	3202375	0
Serum_replicated	tRF-29-W4R951KHZK1V	29	Homo sapiens isolate CHM13 chromosome 16	CP068262	96330374	27	27	27	1	27	3218157	3218183	0
Serum_replicated	tRF-29-W4R951KHZK1V	29	Homo sapiens isolate CHM13 chromosome 16	CP068262	96330374	26	26	23	1	27	3207192	3207166	0
Serum_replicated	tRF-29-W4R951KHZK1V	29	Homo sapiens isolate CHM13 chromosome 16	CP068262	96330374	24	24	15	1	27	3191604	3191630	0
Serum_replicated	tRF-29-W4R951KHZK1V	29	Homo sapiens isolate CHM13 chromosome 16	CP068262	96330374	15	15	15	11	25	19332779	19332793	0
Serum_replicated	tRF-29-W4R951KHZK1V	29	Homo sapiens isolate CHM13 chromosome 16	CP068262	96330374	14	14	14	5	18	4160289	4160276	0
Serum_replicated	tRF-29-W4R951KHZK1V	29	Homo sapiens isolate CHM13 chromosome 16	CP068262	96330374	14	14	14	4	17	62430638	62430625	0
Serum_replicated	tRF-29-W4R951KHZK1V	29	Homo sapiens isolate CHM13 chromosome 16	CP068262	96330374	14	14	14	12	25	53289648	53289661	0
Serum_replicated	tRF-29-W4R951KHZK1V	29	Homo sapiens DNA, chromosome 16, nearly complete genome	AP023476	94690957	27	27	27	1	27	3196297	3196271	0
Serum_replicated	tRF-29-W4R951KHZK1V	29	Homo sapiens DNA, chromosome 16, nearly complete genome	AP023476	94690957	27	27	27	1	27	3214606	3214632	0
Serum_replicated	tRF-29-W4R951KHZK1V	29	Homo sapiens DNA, chromosome 16, nearly complete genome	AP023476	94690957	27	27	27	1	27	3230407	3230433	0
Serum_replicated	tRF-29-W4R951KHZK1V	29	Homo sapiens DNA, chromosome 16, nearly complete genome	AP023476	94690957	26	26	23	1	27	3219445	3219419	0
Serum_replicated	tRF-29-W4R951KHZK1V	29	Homo sapiens DNA, chromosome 16, nearly complete genome	AP023476	94690957	24	24	15	1	27	3203852	3203878	0
Serum_replicated	tRF-29-W4R951KHZK1V	29	Homo sapiens DNA, chromosome 16, nearly complete genome	AP023476	94690957	15	15	15	11	25	18266814	18266828	0
Serum_replicated	tRF-29-W4R951KHZK1V	29	Homo sapiens DNA, chromosome 16, nearly complete genome	AP023476	94690957	14	14	14	5	18	4172094	4172081	0
Serum_replicated	tRF-29-W4R951KHZK1V	29	Homo sapiens DNA, chromosome 16, nearly complete genome	AP023476	94690957	14	14	14	4	17	61032607	61032594	0
Serum_replicated	tRF-29-W4R951KHZK1V	29	Homo sapiens DNA, chromosome 16, nearly complete genome	AP023476	94690957	14	14	14	12	25	51890867	51890880	0
Serum_replicated	tRF-29-W4R951KHZK1V	29	Homo sapiens tripartite motif containing 41 (TRIM41), RefSeqGene on chromosome 5	NG_030346	19546	27	27	27	1	27	3743	3717	0
Serum_replicated	tRF-29-W4R951KHZK1V	29	Homo sapiens tripartite motif containing 7 (TRIM7), RefSeqGene on chromosome 5	NG_029535	18254	27	27	27	1	27	2377	2351	0
Serum_replicated	tRF-29-W4R951KHZK1V	29	Homo sapiens familial mediterranean fever locus genomic sequence	AF091512	87258	27	27	27	1	27	22655	22629	0
Serum_replicated	tRF-29-W4R951KHZK1V	29	Homo sapiens familial mediterranean fever locus genomic sequence	AF091512	87258	27	27	27	1	27	40969	40995	0
Serum_replicated	tRF-29-W4R951KHZK1V	29	Homo sapiens familial mediterranean fever locus genomic sequence	AF091512	87258	27	27	27	1	27	56860	56886	0
Serum_replicated	tRF-29-W4R951KHZK1V	29	Homo sapiens familial mediterranean fever locus genomic sequence	AF091512	87258	26	26	23	1	27	45831	45805	0
Serum_replicated	tRF-29-W4R951KHZK1V	29	Homo sapiens familial mediterranean fever locus genomic sequence	AF091512	87258	24	24	15	1	27	30225	30251	0
Serum_replicated	tRF-29-W4R951KHZK1V	29	Homo sapiens chromosome 15, clone RP11-16K12, complete sequence	AC011944	166309	27	27	27	1	27	165737	165711	0
Serum_replicated	tRF-29-W4R951KHZK1V	29	Homo sapiens chromosome 16 clone RP11-473M20, complete sequence	AC108134	180354	27	27	27	1	27	168955	168929	0
Serum_replicated	tRF-29-W4R951KHZK1V	29	Homo sapiens chromosome 16 clone RP11-473M20, complete sequence	AC108134	180354	24	24	15	1	27	176508	176534	0
Serum_replicated	tRF-29-W4R951KHZK1V	29	Homo sapiens chromosome 5 clone CTC-338M12, complete sequence	AC008443	120515	27	27	27	1	27	42544	42518	0
Serum_replicated	tRF-29-W4R951KHZK1V	29	Homo sapiens chromosome 5 clone CTC-338M12, complete sequence	AC008443	120515	27	27	27	1	27	28340	28366	0
Serum_replicated	tRF-29-W4R951KHZK1V	29	Homo sapiens complete genomic sequence between D16S3070 and D16S3275, containing Familial Mediterranean Fever gene disease	AJ003147	239566	27	27	27	1	27	116653	116627	0
Serum_replicated	tRF-29-W4R951KHZK1V	29	Homo sapiens complete genomic sequence between D16S3070 and D16S3275, containing Familial Mediterranean Fever gene disease	AJ003147	239566	27	27	27	1	27	134967	134993	0
Serum_replicated	tRF-29-W4R951KHZK1V	29	Homo sapiens complete genomic sequence between D16S3070 and D16S3275, containing Familial Mediterranean Fever gene disease	AJ003147	239566	27	27	27	1	27	150776	150802	0
Serum_replicated	tRF-29-W4R951KHZK1V	29	Homo sapiens complete genomic sequence between D16S3070 and D16S3275, containing Familial Mediterranean Fever gene disease	AJ003147	239566	26	26	23	1	27	139810	139784	0
Serum_replicated	tRF-29-W4R951KHZK1V	29	Homo sapiens complete genomic sequence between D16S3070 and D16S3275, containing Familial Mediterranean Fever gene disease	AJ003147	239566	24	24	15	1	27	124215	124241	0
Serum_replicated	tRF-29-W4R951KHZK1V	29	Homo sapiens LHRI_LNC1128.1 lncRNA gene, complete sequence	MN298243	349	27	27	27	1	27	46	72	0
Serum_replicated	tRF-29-W4R951KHZK1V	29	PREDICTED: Homo sapiens olfactory receptor family 1 subfamily F member 1 (OR1F1), transcript variant X1, mRNA	XM_054380407	3130	27	27	27	1	27	768	794	0
Serum_replicated	tRF-29-W4R951KHZK1V	29	Homo sapiens H3K4me1 hESC enhancer GRCh37_chr16:3225435-3225946 (LOC127882894) on chromosome 16	NG_132860	712	27	27	27	1	27	404	430	0
Serum_replicated	tRF-29-W4R951KHZK1V	29	PREDICTED: Homo sapiens olfactory receptor family 1 subfamily F member 1 (OR1F1), transcript variant X1, mRNA	XM_011522507	3130	27	27	27	1	27	768	794	0
Serum_replicated	tRF-29-W4R951KHZK1V	29	Homo sapiens LHRI_LNC2351.1 lncRNA, complete sequence	MW803846	678	27	27	27	1	27	460	486	0
Serum_replicated	tRF-29-W4R951KHZK1V	29	TPA: Homo sapiens tRNA-Lys-CTT-4-1 gene	HG983916	73	27	27	27	1	27	47	73	0
Serum_replicated	tRF-29-W4R951KHZK1V	29	TPA: Homo sapiens tRNA-Lys-CTT-3-1 gene	HG983915	73	27	27	27	1	27	47	73	0
Serum_replicated	tRF-29-W4R951KHZK1V	29	TPA: Homo sapiens tRNA-Lys-CTT-2-1 gene >gi|634722144|tpe|HG983911.1| TPA: Homo sapiens tRNA-Lys-CTT-2-5 gene >gi|634722146|tpe|HG983912.1| TPA: Homo sapiens tRNA-Lys-CTT-2-2 gene >gi|634722147|tpe|HG983913.1| TPA: Homo sapiens tRNA-Lys-CTT-2-3 gene >gi|634722148|tpe|HG983914.1| TPA: Homo sapiens tRNA-Lys-CTT-2-4 gene >gi|634723134|tpe|HG984450.1| TPA: Mus musculus tRNA-Lys-CTT-3-1 gene >gi|63472…	HG983910	73	27	27	27	1	27	47	73	0
Serum_replicated	tRF-29-W4R951KHZK1V	29	TPA: Homo sapiens tRNA-Lys-CTT-1-1 gene >gi|634722140|tpe|HG983909.1| TPA: Homo sapiens tRNA-Lys-CTT-1-2 gene >gi|634723131|tpe|HG984448.1| TPA: Mus musculus tRNA-Lys-CTT-2-1 gene >gi|634723133|tpe|HG984449.1| TPA: Mus musculus tRNA-Lys-CTT-2-2 gene >gi|634723868|tpe|HG984850.1| TPA: Rattus norvegicus tRNA-Lys-CTT-1-1 gene	HG983908	73	27	27	27	1	27	47	73	0
Serum_replicated	tRF-29-W4R951KHZK1V	29	Homo sapiens isolate CHM13 chromosome 15	CP068263	99753195	27	27	27	1	27	76724280	76724306	0
Serum_replicated	tRF-29-W4R951KHZK1V	29	Homo sapiens isolate CHM13 chromosome 15	CP068263	99753195	28	28	25	1	29	93549308	93549336	0
Serum_replicated	tRF-29-W4R951KHZK1V	29	Homo sapiens isolate CHM13 chromosome 15	CP068263	99753195	15	15	15	12	26	62898242	62898228	0
Serum_replicated	tRF-29-W4R951KHZK1V	29	Homo sapiens isolate CHM13 chromosome 15	CP068263	99753195	15	15	15	4	18	64060745	64060731	0
Serum_replicated	tRF-29-W4R951KHZK1V	29	Homo sapiens isolate CHM13 chromosome 15	CP068263	99753195	18	18	15	11	29	43050421	43050439	0
Serum_replicated	tRF-29-W4R951KHZK1V	29	Homo sapiens isolate CHM13 chromosome 15	CP068263	99753195	14	14	14	13	26	49090482	49090469	0
Serum_replicated	tRF-29-W4R951KHZK1V	29	Homo sapiens DNA, chromosome 15, nearly complete genome	AP023475	95537968	27	27	27	1	27	72584679	72584705	0
Serum_replicated	tRF-29-W4R951KHZK1V	29	Homo sapiens DNA, chromosome 15, nearly complete genome	AP023475	95537968	28	28	25	1	29	89407722	89407750	0
Serum_replicated	tRF-29-W4R951KHZK1V	29	Homo sapiens DNA, chromosome 15, nearly complete genome	AP023475	95537968	15	15	15	12	26	58800462	58800448	0
Serum_replicated	tRF-29-W4R951KHZK1V	29	Homo sapiens DNA, chromosome 15, nearly complete genome	AP023475	95537968	18	18	15	11	29	38961295	38961313	0
Serum_replicated	tRF-29-W4R951KHZK1V	29	Homo sapiens DNA, chromosome 15, nearly complete genome	AP023475	95537968	14	14	14	13	26	44999857	44999844	0
Serum_replicated	tRF-29-W4R951KHZK1V	29	Homo sapiens FOSMID clone ABC27-2378J19 from chromosome 5, complete sequence	AC239410	39831	27	27	27	1	27	39176	39202	0
Serum_replicated	tRF-29-W4R951KHZK1V	29	Homo sapiens chromosome 15, clone RP11-1001M11, complete sequence	AC103975	213676	27	27	27	1	27	187264	187290	0
Serum_replicated	tRF-29-W4R951KHZK1V	29	Human Val-tRNA and Lys-tRNA genes	M33940	7078	27	27	27	1	27	1007	1033	0
Serum_replicated	tRF-29-W4R951KHZK1V	29	Homo sapiens chromosome 15, clone RP11-44F11, complete sequence	AC012195	106057	28	28	25	1	29	16763	16791	0
Serum_replicated	tRF-29-W4R951KHZK1V	29	Homo sapiens, clone RP11-44B21, complete sequence	AC015574	150288	28	28	25	1	29	140991	141019	0
Serum_replicated	tRF-29-W4R951KHZK1V	29	TPA: Homo sapiens tRNA-Lys-CTT-5-1 gene	HG983917	73	26	26	23	1	27	47	73	0
Serum_replicated	tRF-29-W4R951KHZK1V	29	Homo sapiens chromosome 5 clone RP11-668G8, complete sequence	AC116357	166827	22	22	22	8	29	90756	90777	0
Serum_replicated	tRF-29-W4R951KHZK1V	29	Homo sapiens BAC clone RP11-525A11 from 7, complete sequence	AC073421	98415	27	27	21	1	29	87843	87815	0
Serum_replicated	tRF-29-W4R951KHZK1V	29	Human DNA sequence from clone RP11-453C2 on chromosome 6, complete sequence	AL356962	186301	21	21	21	9	29	16991	16971	0
Serum_replicated	tRF-29-W4R951KHZK1V	29	Homo sapiens beta-1,4-N-acetyl-galactosaminyltransferase 2 (B4GALNT2), transcript variant 2, mRNA	NM_001159387	8657	24	24	21	5	29	7991	8015	0
Serum_replicated	tRF-29-W4R951KHZK1V	29	Homo sapiens beta-1,4-N-acetyl-galactosaminyltransferase 2 (B4GALNT2), transcript variant 1, mRNA	NM_153446	9070	24	24	21	5	29	8404	8428	0
Serum_replicated	tRF-29-W4R951KHZK1V	29	PREDICTED: Homo sapiens beta-1,4-N-acetyl-galactosaminyltransferase 2 (B4GALNT2), transcript variant X1, mRNA	XM_054315024	8722	24	24	21	5	29	8056	8080	0
Serum_replicated	tRF-29-W4R951KHZK1V	29	Homo sapiens interphotoreceptor matrix proteoglycan 1 (IMPG1), RefSeqGene on chromosome 6	NG_041812	158565	21	21	21	9	29	51355	51375	0
Serum_replicated	tRF-29-W4R951KHZK1V	29	PREDICTED: Homo sapiens beta-1,4-N-acetyl-galactosaminyltransferase 2 (B4GALNT2), transcript variant X1, mRNA	XM_017024173	8722	24	24	21	5	29	8056	8080	0
Serum_replicated	tRF-29-W4R951KHZK1V	29	Homo sapiens isolate CHM13 chromosome 17	CP068261	84276897	24	24	21	5	29	50039263	50039287	0
Serum_replicated	tRF-29-W4R951KHZK1V	29	Homo sapiens isolate CHM13 chromosome 17	CP068261	84276897	15	15	15	5	19	12715814	12715800	0
Serum_replicated	tRF-29-W4R951KHZK1V	29	Homo sapiens isolate CHM13 chromosome 17	CP068261	84276897	18	18	15	11	29	44194581	44194599	0
Serum_replicated	tRF-29-W4R951KHZK1V	29	Homo sapiens isolate CHM13 chromosome 17	CP068261	84276897	14	14	14	12	25	21238106	21238093	0
Serum_replicated	tRF-29-W4R951KHZK1V	29	Homo sapiens isolate CHM13 chromosome 17	CP068261	84276897	14	14	14	6	19	28626230	28626217	0
Serum_replicated	tRF-29-W4R951KHZK1V	29	Homo sapiens isolate CHM13 chromosome 17	CP068261	84276897	14	14	14	13	26	74181439	74181426	0
Serum_replicated	tRF-29-W4R951KHZK1V	29	Homo sapiens isolate CHM13 chromosome 17	CP068261	84276897	14	14	14	6	19	21028900	21028913	0
Serum_replicated	tRF-29-W4R951KHZK1V	29	Homo sapiens DNA, chromosome 17, nearly complete genome	AP023477	80688777	24	24	21	5	29	46613236	46613260	0
Serum_replicated	tRF-29-W4R951KHZK1V	29	Homo sapiens DNA, chromosome 17, nearly complete genome	AP023477	80688777	15	15	15	5	19	12895846	12895832	0
Serum_replicated	tRF-29-W4R951KHZK1V	29	Homo sapiens DNA, chromosome 17, nearly complete genome	AP023477	80688777	18	18	15	11	29	41041887	41041905	0
Serum_replicated	tRF-29-W4R951KHZK1V	29	Homo sapiens DNA, chromosome 17, nearly complete genome	AP023477	80688777	14	14	14	12	25	21495034	21495021	0
Serum_replicated	tRF-29-W4R951KHZK1V	29	Homo sapiens DNA, chromosome 17, nearly complete genome	AP023477	80688777	14	14	14	6	19	25750031	25750018	0
Serum_replicated	tRF-29-W4R951KHZK1V	29	Homo sapiens DNA, chromosome 17, nearly complete genome	AP023477	80688777	14	14	14	13	26	70775808	70775795	0
Serum_replicated	tRF-29-W4R951KHZK1V	29	Homo sapiens DNA, chromosome 17, nearly complete genome	AP023477	80688777	14	14	14	6	19	21285959	21285972	0
Serum_replicated	tRF-29-W4R951KHZK1V	29	Homo sapiens beta-1,4-N-acetyl-galactosaminyltransferase 2 (B4GALNT2), transcript variant 3, mRNA	NM_001159388	8670	24	24	21	5	29	8004	8028	0
Serum_replicated	tRF-29-W4R951KHZK1V	29	Homo sapiens chromosome 17, clone RP11-708H21, complete sequence	AC069454	104901	24	24	21	5	29	65838	65862	0
Serum_replicated	tRF-29-W4R951KHZK1V	29	Homo sapiens chromosome 5 clone RP11-90F2, complete sequence	AC113431	156789	23	23	20	3	26	20560	20537	0
Serum_replicated	tRF-29-W4R951KHZK1V	29	TPA: Homo sapiens tRNA-Lys-CTT-9-1 gene	HG983921	73	23	23	20	3	26	49	72	0
Serum_replicated	tRF-29-W4R951KHZK1V	29	Homo sapiens chromosome 5 clone RP11-524C16, complete sequence	AC093294	171739	23	23	20	3	26	11031	11054	0
Serum_replicated	tRF-29-W4R951KHZK1V	29	Human DNA sequence from clone RP11-209A2 on chromosome 6, complete sequence	AL121934	49261	19	19	19	8	26	22485	22467	0
Serum_replicated	tRF-29-W4R951KHZK1V	29	Human DNA sequence from clone RP11-30C8 on chromosome 13, complete sequence	AL138964	44623	19	19	19	11	29	33751	33733	0
Serum_replicated	tRF-29-W4R951KHZK1V	29	H.sapiens CpG island DNA genomic Mse1 fragment, clone 97h7, forward read cpg97h7.ft1a	Z64147	181	19	19	19	8	26	104	86	0
Serum_replicated	tRF-29-W4R951KHZK1V	29	TPA: Homo sapiens tRNA-Lys-CTT-12-1 gene	HG983924	73	25	25	19	1	27	47	73	0
Serum_replicated	tRF-29-W4R951KHZK1V	29	Homo sapiens tRNA-Lys (anticodon CTT) 12-1 (TRK-CTT12-1) pseudogene on chromosome 1	NG_008522	273	25	25	19	1	27	147	173	0
Serum_replicated	tRF-29-W4R951KHZK1V	29	Human DNA sequence from clone RP11-69E11 on chromosome 1, complete sequence	AL365277	115968	25	25	19	1	27	47331	47357	0
Serum_replicated	tRF-29-W4R951KHZK1V	29	Human DNA sequence from clone RP1-110F11 on chromosome 1p33-34.3, complete sequence	AL033526	112339	25	25	19	1	27	2554	2580	0
Serum_replicated	tRF-29-W4R951KHZK1V	29	Human DNA sequence from clone RP1-110F11 on chromosome 1p33-34.3, complete sequence	AL033526	112339	25	25	19	1	27	3013	3039	0
Serum_replicated	tRF-29-W4R951KHZK1V	29	H.sapiens CpG island DNA genomic Mse1 fragment, clone 97h7, reverse read cpg97h7.rt1a	Z64148	182	19	19	19	8	26	79	97	0
Serum_replicated	tRF-29-W4R951KHZK1V	29	Homo sapiens NANOG hESC enhancer GRCh37_chr3:125609269-125610164 (LOC127398499) on chromosome 3	NG_100468	1096	18	18	18	12	29	958	941	0
Serum_replicated	tRF-29-W4R951KHZK1V	29	Homo sapiens isolate CHM13 chromosome 18	CP068260	80542538	24	24	18	1	26	46280292	46280267	0
Serum_replicated	tRF-29-W4R951KHZK1V	29	Homo sapiens isolate CHM13 chromosome 18	CP068260	80542538	15	15	15	4	18	37591453	37591439	0
Serum_replicated	tRF-29-W4R951KHZK1V	29	Homo sapiens isolate CHM13 chromosome 18	CP068260	80542538	14	14	14	12	25	59404135	59404122	0
Serum_replicated	tRF-29-W4R951KHZK1V	29	Homo sapiens isolate HML-2_12q24.11 endogenous virus HERV-K, complete sequence	JN675069	1485	18	18	18	12	29	991	974	0
Serum_replicated	tRF-29-W4R951KHZK1V	29	Homo sapiens isolate HML-2_3q27.2 endogenous virus HERV-K, complete sequence	JN675025	9180	18	18	18	12	29	988	971	0
Serum_replicated	tRF-29-W4R951KHZK1V	29	Homo sapiens isolate HML-2_3q21.2 endogenous virus HERV-K, complete sequence	JN675023	8463	18	18	18	12	29	856	839	0
Serum_replicated	tRF-29-W4R951KHZK1V	29	Homo sapiens DNA, chromosome 18, nearly complete genome	AP023478	77846715	24	24	18	1	26	43535457	43535432	0
Serum_replicated	tRF-29-W4R951KHZK1V	29	Homo sapiens DNA, chromosome 18, nearly complete genome	AP023478	77846715	15	15	15	4	18	34811922	34811908	0
Serum_replicated	tRF-29-W4R951KHZK1V	29	Homo sapiens DNA, chromosome 18, nearly complete genome	AP023478	77846715	14	14	14	12	25	56660075	56660062	0
Serum_replicated	tRF-29-W4R951KHZK1V	29	Homo sapiens ectonucleotide pyrophosphatase/phosphodiesterase 7 pseudogene 4 (ENPP7P4) on chromosome 3	NG_025738	61392	18	18	18	12	29	43161	43144	0
Serum_replicated	tRF-29-W4R951KHZK1V	29	Homo sapiens clone 212 MMTV integration site genomic sequence	EU018994	81	18	18	18	12	29	71	54	0
Serum_replicated	tRF-29-W4R951KHZK1V	29	Homo sapiens endogenous virus Human endogenous retrovirus K HERV-K50B, complete sequence	DQ112147	9180	18	18	18	12	29	989	972	0
Serum_replicated	tRF-29-W4R951KHZK1V	29	Homo sapiens PAC clone RP4-725G10 from 7, complete sequence	AC006970	136098	18	18	18	8	25	50934	50917	0
Serum_replicated	tRF-29-W4R951KHZK1V	29	Homo sapiens BAC clone RP11-612L3 from 7, complete sequence	AC079796	129320	18	18	18	12	29	94186	94169	0
Serum_replicated	tRF-29-W4R951KHZK1V	29	Human DNA sequence from clone SCb-24o18 on chromosome 6p21.31-22.2, complete sequence	AL021808	154066	18	18	18	2	19	15808	15791	0
Serum_replicated	tRF-29-W4R951KHZK1V	29	Human DNA sequence from clone SCb-24o18 on chromosome 6p21.31-22.2, complete sequence	AL021808	154066	17	17	14	1	18	59235	59252	0
Serum_replicated	tRF-29-W4R951KHZK1V	29	Human DNA sequence from clone RP1-117O3 on chromosome 1p33-34.3, complete sequence	AL020995	150997	18	18	18	12	29	74025	74008	0
Serum_replicated	tRF-29-W4R951KHZK1V	29	Homo sapiens 3 BAC RP11-32M21 (Roswell Park Cancer Institute Human BAC Library) complete sequence	AC069410	176924	18	18	18	12	29	105666	105649	0
Serum_replicated	tRF-29-W4R951KHZK1V	29	Homo sapiens 3 BAC RP11-537I16 (Roswell Park Cancer Institute Human BAC Library) complete sequence	AC133473	54277	18	18	18	12	29	49178	49161	0
Serum_replicated	tRF-29-W4R951KHZK1V	29	Homo sapiens ATP synthase F1 subunit alpha (ATP5F1A), RefSeqGene on chromosome 18; nuclear gene for mitochondrial product	NG_041769	35986	24	24	18	1	26	24903	24928	0
Serum_replicated	tRF-29-W4R951KHZK1V	29	TPA: Homo sapiens tRNA-Lys-CTT-6-1 gene	HG983918	73	24	24	18	1	26	47	72	0
Serum_replicated	tRF-29-W4R951KHZK1V	29	TPA: Homo sapiens tRNA-Leu-TAA-4-1 gene	HG983902	83	18	18	18	2	19	58	75	0
Serum_replicated	tRF-29-W4R951KHZK1V	29	Homo sapiens FOSMID clone ABC16-1531G4 from chromosome 7, complete sequence	AC245176	39398	18	18	18	8	25	18016	18033	0
Serum_replicated	tRF-29-W4R951KHZK1V	29	Homo sapiens FOSMID clone ABC10-44788800F8 from chromosome unknown, complete sequence	AC231384	43469	18	18	18	12	29	39697	39714	0
Serum_replicated	tRF-29-W4R951KHZK1V	29	Homo sapiens FOSMID clone ABC9-43958500J8 from chromosome 7, complete sequence	AC208164	41939	18	18	18	8	25	12035	12052	0
Serum_replicated	tRF-29-W4R951KHZK1V	29	Homo sapiens chromosome , clone RP11-8H2, complete sequence	AC012569	153276	24	24	18	1	26	61652	61677	0
Serum_replicated	tRF-29-W4R951KHZK1V	29	Human DNA sequence from clone RP11-183G22 on chromosome 1, complete sequence	AL596275	139273	18	18	18	4	21	22945	22962	0
Serum_replicated	tRF-29-W4R951KHZK1V	29	Homo sapiens 3 BAC RP11-666A20 (Roswell Park Cancer Institute Human BAC Library) complete sequence	AC092903	161141	18	18	18	12	29	151659	151676	0
Serum_replicated	tRF-29-W4R951KHZK1V	29	Homo sapiens PAC clone RP5-981O7 from 7q34-q36, complete sequence	AC006017	162556	18	18	18	4	21	34658	34675	0
Serum_replicated	tRF-29-W4R951KHZK1V	29	Homo sapiens 12q24 PAC RPCI3-424M6 (Roswell Park Cancer Institute Human PAC library) complete sequence	AC002350	167217	18	18	18	12	29	44779	44796	0
Serum_replicated	tRF-29-W4R951KHZK1V	29	Homo sapiens gene for ATP synthase alpha subunit, complete cds (exon 1 to 12)	D28126	18004	24	24	18	1	26	12279	12304	0
Serum_replicated	tRF-29-W4R951KHZK1V	29	Homo sapiens BAC clone CH17-254K1 from chromosome x, complete sequence	AC244107	206106	17	17	17	13	29	104135	104119	0
Serum_replicated	tRF-29-W4R951KHZK1V	29	Homo sapiens BAC clone CH17-254K1 from chromosome x, complete sequence	AC244107	206106	17	17	17	13	29	129221	129237	0
Serum_replicated	tRF-29-W4R951KHZK1V	29	Homo sapiens BAC clone CH17-340M24 from chromosome x, complete sequence	AC244090	236731	17	17	17	13	29	216448	216432	0
Serum_replicated	tRF-29-W4R951KHZK1V	29	Homo sapiens isolate HML-2_Xq28b endogenous virus HERV-K, complete sequence	JN675093	7343	17	17	17	13	29	1008	992	0
Serum_replicated	tRF-29-W4R951KHZK1V	29	Homo sapiens DNA, sequence_id: unplaced_0320	AP023805	32733	17	17	17	13	29	26573	26557	0
Serum_replicated	tRF-29-W4R951KHZK1V	29	Homo sapiens chromosome 6 clone CH17-469M3, complete sequence	AC256294	175865	17	17	17	13	29	160169	160185	0
Serum_replicated	tRF-29-W4R951KHZK1V	29	Homo sapiens cell line MHC_SSTO major histocompatibility complex genomic sequence	OK649236	5046869	17	17	17	13	29	3473772	3473788	0
Serum_replicated	tRF-29-W4R951KHZK1V	29	Homo sapiens cell line MHC_SSTO major histocompatibility complex genomic sequence	OK649236	5046869	17	17	17	13	29	3506498	3506514	0
Serum_replicated	tRF-29-W4R951KHZK1V	29	Homo sapiens cell line MHC_QBL major histocompatibility complex genomic sequence	OK649235	4904957	17	17	17	13	29	3476391	3476407	0
Serum_replicated	tRF-29-W4R951KHZK1V	29	Homo sapiens cell line MHC_MANN major histocompatibility complex genomic sequence	OK649234	5025632	17	17	17	13	29	3473976	3473992	0
Serum_replicated	tRF-29-W4R951KHZK1V	29	Homo sapiens cell line MHC_KAS116 major histocompatibility complex genomic sequence	OK649233	4911494	17	17	17	13	29	3421371	3421387	0
Serum_replicated	tRF-29-W4R951KHZK1V	29	Homo sapiens cell line MHC_KAS116 major histocompatibility complex genomic sequence	OK649233	4911494	17	17	17	13	29	3454161	3454177	0
Serum_replicated	tRF-29-W4R951KHZK1V	29	Homo sapiens cell line MHC_DBB major histocompatibility complex genomic sequence	OK649232	5048538	17	17	17	13	29	3471645	3471661	0
Serum_replicated	tRF-29-W4R951KHZK1V	29	Homo sapiens cell line MHC_APD major histocompatibility complex genomic sequence	OK649231	4929193	17	17	17	13	29	3465279	3465295	0
Serum_replicated	tRF-29-W4R951KHZK1V	29	Homo sapiens cell line MHC_APD major histocompatibility complex genomic sequence	OK649231	4929193	17	17	17	13	29	3498014	3498030	0
Serum_replicated	tRF-29-W4R951KHZK1V	29	Homo sapiens BAC clone CH17-299L8 from chromosome 6, complete sequence	AC255554	249509	17	17	17	13	29	82270	82286	0
Serum_replicated	tRF-29-W4R951KHZK1V	29	Homo sapiens BAC clone CH17-299L8 from chromosome 6, complete sequence	AC255554	249509	17	17	17	13	29	115008	115024	0
Serum_replicated	tRF-29-W4R951KHZK1V	29	Homo sapiens isolate CHM13 chromosome 21	CP068257	45090682	20	20	17	9	29	32548726	32548746	0
Serum_replicated	tRF-29-W4R951KHZK1V	29	Homo sapiens isolate CHM13 chromosome 21	CP068257	45090682	15	15	15	4	18	28279069	28279083	0
Serum_replicated	tRF-29-W4R951KHZK1V	29	Homo sapiens isolate CHM13 chromosome 21	CP068257	45090682	14	14	14	3	16	25502058	25502045	0
Serum_replicated	tRF-29-W4R951KHZK1V	29	Homo sapiens DNA, sequence_id: unplaced_0247	AP023732	42872	17	17	17	13	29	18836	18852	0
Serum_replicated	tRF-29-W4R951KHZK1V	29	Homo sapiens DNA, chromosome 21, nearly complete genome	AP023481	44550604	20	20	17	9	29	32003378	32003398	0
Serum_replicated	tRF-29-W4R951KHZK1V	29	Homo sapiens DNA, chromosome 21, nearly complete genome	AP023481	44550604	15	15	15	4	18	27729854	27729868	0
Serum_replicated	tRF-29-W4R951KHZK1V	29	Homo sapiens DNA, chromosome 21, nearly complete genome	AP023481	44550604	14	14	14	3	16	24956342	24956329	0
Serum_replicated	tRF-30-87R95RM3Y826	30	Bombyx mori major Phe-tRNA >gi|173964|gb|K00353.1|BOVTRF2 Bovine Phe-tRNA-2 >gi|174920|gb|K00350.1|HUMTRF Human Phe-tRNA >gi|175414|gb|K02684.1|MUSTRF Mouse Phe-tRNA >gi|175415|gb|K02685.1|MUSTRFTA Mouse Erlich ascites tumor-specific Phe-tRNA >gi|175416|gb|K02686.1|MUSTRFTB Mouse neuroblastoma tumor-specific Phe-tRNA >gi|175759|gb|K00351.1|RABTRF Rabbit Phe-tRNA >gi|176346|gb|K02849.1|XELTRF X.le…	K00350	76	30	30	30	1	30	47	76	0
Serum_replicated	tRF-30-87R95RM3Y826	30	Homo sapiens piRNA piR-43773, complete sequence	DQ575661	29	29	29	29	1	29	1	29	0
Serum_replicated	tRF-30-87R95RM3Y826	30	Homo sapiens P300/CBP strongly-dependent group 1 enhancer GRCh37_chr12:125412388-125413587 (LOC126861671) on chromosome 12	NG_086169	1400	28	28	28	1	28	128	101	0
Serum_replicated	tRF-30-87R95RM3Y826	30	Homo sapiens 12 BAC RP11-549I9 (Roswell Park Cancer Institute Human BAC Library) complete sequence	AC093719	79925	28	28	28	1	28	79697	79724	0
Serum_replicated	tRF-30-87R95RM3Y826	30	Homo sapiens 12 BAC RP11-592O2 (Roswell Park Cancer Institute Human BAC Library) complete sequence	AC126309	121984	28	28	28	1	28	120206	120179	0
Serum_replicated	tRF-30-87R95RM3Y826	30	H.sapiens CpG island DNA genomic Mse1 fragment, clone 187a11, reverse read cpg187a11.rt1a	Z57612	294	28	28	28	1	28	238	265	0
Serum_replicated	tRF-30-87R95RM3Y826	30	Homo sapiens cell line MHC_SSTO major histocompatibility complex genomic sequence	OK649236	5046869	27	27	27	1	27	282530	282504	0
Serum_replicated	tRF-30-87R95RM3Y826	30	Homo sapiens cell line MHC_SSTO major histocompatibility complex genomic sequence	OK649236	5046869	27	27	27	1	27	473671	473645	0
Serum_replicated	tRF-30-87R95RM3Y826	30	Homo sapiens cell line MHC_SSTO major histocompatibility complex genomic sequence	OK649236	5046869	23	23	23	1	23	256236	256258	0
Serum_replicated	tRF-30-87R95RM3Y826	30	Homo sapiens cell line MHC_SSTO major histocompatibility complex genomic sequence	OK649236	5046869	26	26	23	1	27	299552	299526	0
Serum_replicated	tRF-30-87R95RM3Y826	30	Homo sapiens cell line MHC_SSTO major histocompatibility complex genomic sequence	OK649236	5046869	26	26	23	1	27	315034	315008	0
Serum_replicated	tRF-30-87R95RM3Y826	30	Homo sapiens cell line MHC_QBL major histocompatibility complex genomic sequence	OK649235	4904957	27	27	27	1	27	282835	282809	0
Serum_replicated	tRF-30-87R95RM3Y826	30	Homo sapiens cell line MHC_QBL major histocompatibility complex genomic sequence	OK649235	4904957	27	27	27	1	27	473773	473747	0
Serum_replicated	tRF-30-87R95RM3Y826	30	Homo sapiens cell line MHC_QBL major histocompatibility complex genomic sequence	OK649235	4904957	23	23	23	1	23	256514	256536	0
Serum_replicated	tRF-30-87R95RM3Y826	30	Homo sapiens cell line MHC_QBL major histocompatibility complex genomic sequence	OK649235	4904957	26	26	23	1	27	299931	299905	0
Serum_replicated	tRF-30-87R95RM3Y826	30	Homo sapiens cell line MHC_QBL major histocompatibility complex genomic sequence	OK649235	4904957	26	26	23	1	27	315416	315390	0
Serum_replicated	tRF-30-87R95RM3Y826	30	Homo sapiens cell line MHC_MANN major histocompatibility complex genomic sequence	OK649234	5025632	27	27	27	1	27	283058	283032	0
Serum_replicated	tRF-30-87R95RM3Y826	30	Homo sapiens cell line MHC_MANN major histocompatibility complex genomic sequence	OK649234	5025632	27	27	27	1	27	474012	473986	0
Serum_replicated	tRF-30-87R95RM3Y826	30	Homo sapiens cell line MHC_MANN major histocompatibility complex genomic sequence	OK649234	5025632	23	23	23	1	23	256743	256765	0
Serum_replicated	tRF-30-87R95RM3Y826	30	Homo sapiens cell line MHC_MANN major histocompatibility complex genomic sequence	OK649234	5025632	26	26	23	1	27	300166	300140	0
Serum_replicated	tRF-30-87R95RM3Y826	30	Homo sapiens cell line MHC_MANN major histocompatibility complex genomic sequence	OK649234	5025632	26	26	23	1	27	315650	315624	0
Serum_replicated	tRF-30-87R95RM3Y826	30	Homo sapiens cell line MHC_KAS116 major histocompatibility complex genomic sequence	OK649233	4911494	27	27	27	1	27	282678	282652	0
Serum_replicated	tRF-30-87R95RM3Y826	30	Homo sapiens cell line MHC_KAS116 major histocompatibility complex genomic sequence	OK649233	4911494	27	27	27	1	27	473932	473906	0
Serum_replicated	tRF-30-87R95RM3Y826	30	Homo sapiens cell line MHC_KAS116 major histocompatibility complex genomic sequence	OK649233	4911494	23	23	23	1	23	256363	256385	0
Serum_replicated	tRF-30-87R95RM3Y826	30	Homo sapiens cell line MHC_KAS116 major histocompatibility complex genomic sequence	OK649233	4911494	26	26	23	1	27	299690	299664	0
Serum_replicated	tRF-30-87R95RM3Y826	30	Homo sapiens cell line MHC_KAS116 major histocompatibility complex genomic sequence	OK649233	4911494	26	26	23	1	27	315188	315162	0
Serum_replicated	tRF-30-87R95RM3Y826	30	Homo sapiens cell line MHC_DBB major histocompatibility complex genomic sequence	OK649232	5048538	27	27	27	1	27	282974	282948	0
Serum_replicated	tRF-30-87R95RM3Y826	30	Homo sapiens cell line MHC_DBB major histocompatibility complex genomic sequence	OK649232	5048538	27	27	27	1	27	473889	473863	0
Serum_replicated	tRF-30-87R95RM3Y826	30	Homo sapiens cell line MHC_DBB major histocompatibility complex genomic sequence	OK649232	5048538	23	23	23	1	23	256682	256704	0
Serum_replicated	tRF-30-87R95RM3Y826	30	Homo sapiens cell line MHC_DBB major histocompatibility complex genomic sequence	OK649232	5048538	26	26	23	1	27	300076	300050	0
Serum_replicated	tRF-30-87R95RM3Y826	30	Homo sapiens cell line MHC_DBB major histocompatibility complex genomic sequence	OK649232	5048538	26	26	23	1	27	315559	315533	0
Serum_replicated	tRF-30-87R95RM3Y826	30	Homo sapiens cell line MHC_APD major histocompatibility complex genomic sequence	OK649231	4929193	27	27	27	1	27	282880	282854	0
Serum_replicated	tRF-30-87R95RM3Y826	30	Homo sapiens cell line MHC_APD major histocompatibility complex genomic sequence	OK649231	4929193	27	27	27	1	27	473889	473863	0
Serum_replicated	tRF-30-87R95RM3Y826	30	Homo sapiens cell line MHC_APD major histocompatibility complex genomic sequence	OK649231	4929193	23	23	23	1	23	256560	256582	0
Serum_replicated	tRF-30-87R95RM3Y826	30	Homo sapiens cell line MHC_APD major histocompatibility complex genomic sequence	OK649231	4929193	26	26	23	1	27	299986	299960	0
Serum_replicated	tRF-30-87R95RM3Y826	30	Homo sapiens cell line MHC_APD major histocompatibility complex genomic sequence	OK649231	4929193	26	26	23	1	27	315473	315447	0
Serum_replicated	tRF-30-87R95RM3Y826	30	PREDICTED: Homo sapiens uncharacterized LOC124903191 (LOC124903191), transcript variant X2, ncRNA	XR_007063836	2634	27	27	27	1	27	929	903	0
Serum_replicated	tRF-30-87R95RM3Y826	30	TPA: Homo sapiens tRNA-Phe-GAA-1-3 gene >gi|634722242|tpe|HG983961.1| TPA: Homo sapiens tRNA-Phe-GAA-1-4 gene >gi|634722244|tpe|HG983962.1| TPA: Homo sapiens tRNA-Phe-GAA-1-5 gene >gi|634722246|tpe|HG983963.1| TPA: Homo sapiens tRNA-Phe-GAA-1-6 gene >gi|634722248|tpe|HG983964.1| TPA: Homo sapiens tRNA-Phe-GAA-1-1 gene >gi|634722250|tpe|HG983965.1| TPA: Homo sapiens tRNA-Phe-GAA-1-2 gene >gi|63472…	HG983960	73	27	27	27	1	27	47	73	0
Serum_replicated	tRF-30-87R95RM3Y826	30	Homo sapiens isolate CHM13 chromosome 19	CP068259	61707364	27	27	27	1	27	1353385	1353359	0
Serum_replicated	tRF-30-87R95RM3Y826	30	Homo sapiens isolate CHM13 chromosome 19	CP068259	61707364	18	18	15	1	19	4708984	4708966	0
Serum_replicated	tRF-30-87R95RM3Y826	30	Homo sapiens isolate CHM13 chromosome 19	CP068259	61707364	18	18	15	12	30	12358925	12358943	0
Serum_replicated	tRF-30-87R95RM3Y826	30	Homo sapiens isolate CHM13 chromosome 19	CP068259	61707364	14	14	14	5	18	4739300	4739313	0
Serum_replicated	tRF-30-87R95RM3Y826	30	Homo sapiens isolate CHM13 chromosome 19	CP068259	61707364	14	14	14	6	19	44748005	44748018	0
Serum_replicated	tRF-30-87R95RM3Y826	30	Homo sapiens DNA, chromosome 19, nearly complete genome	AP023479	59105444	27	27	27	1	27	1238558	1238532	0
Serum_replicated	tRF-30-87R95RM3Y826	30	Homo sapiens DNA, chromosome 19, nearly complete genome	AP023479	59105444	18	18	15	1	19	4587676	4587658	0
Serum_replicated	tRF-30-87R95RM3Y826	30	Homo sapiens DNA, chromosome 19, nearly complete genome	AP023479	59105444	18	18	15	12	30	12117049	12117067	0
Serum_replicated	tRF-30-87R95RM3Y826	30	Homo sapiens DNA, chromosome 19, nearly complete genome	AP023479	59105444	14	14	14	5	18	4618022	4618035	0
Serum_replicated	tRF-30-87R95RM3Y826	30	Homo sapiens DNA, chromosome 19, nearly complete genome	AP023479	59105444	14	14	14	6	19	42087986	42087999	0
Serum_replicated	tRF-30-87R95RM3Y826	30	Homo sapiens NADH:ubiquinone oxidoreductase core subunit S7 (NDUFS7), RefSeqGene on chromosome 19; nuclear gene for mitochondrial product	NG_008283	18706	27	27	27	1	27	4505	4479	0
Serum_replicated	tRF-30-87R95RM3Y826	30	Human DNA sequence from clone DAAP-101P24 on chromosome 6, complete sequence	CR759954	94061	27	27	27	1	27	15603	15577	0
Serum_replicated	tRF-30-87R95RM3Y826	30	Human DNA sequence from clone DAAP-101P24 on chromosome 6, complete sequence	CR759954	94061	26	26	23	1	27	32708	32682	0
Serum_replicated	tRF-30-87R95RM3Y826	30	Human DNA sequence from clone DAAP-101P24 on chromosome 6, complete sequence	CR759954	94061	26	26	23	1	27	48191	48165	0
Serum_replicated	tRF-30-87R95RM3Y826	30	Human DNA sequence from clone DADB-91F17 on chromosome 6, complete sequence	CR753651	124464	27	27	27	1	27	48335	48309	0
Serum_replicated	tRF-30-87R95RM3Y826	30	Human DNA sequence from clone DADB-91F17 on chromosome 6, complete sequence	CR753651	124464	23	23	23	1	23	22027	22049	0
Serum_replicated	tRF-30-87R95RM3Y826	30	Human DNA sequence from clone DADB-91F17 on chromosome 6, complete sequence	CR753651	124464	26	26	23	1	27	65455	65429	0
Serum_replicated	tRF-30-87R95RM3Y826	30	Human DNA sequence from clone DADB-91F17 on chromosome 6, complete sequence	CR753651	124464	26	26	23	1	27	80938	80912	0
Serum_replicated	tRF-30-87R95RM3Y826	30	Human DNA sequence from clone DASS-263B11 on chromosome 6, complete sequence	BX470194	43833	27	27	27	1	27	1197	1171	0
Serum_replicated	tRF-30-87R95RM3Y826	30	Human DNA sequence from clone DASS-263B11 on chromosome 6, complete sequence	BX470194	43833	26	26	23	1	27	18220	18194	0
Serum_replicated	tRF-30-87R95RM3Y826	30	Human DNA sequence from clone DASS-263B11 on chromosome 6, complete sequence	BX470194	43833	26	26	23	1	27	33701	33675	0
Serum_replicated	tRF-30-87R95RM3Y826	30	Human DNA sequence from clone DASS-381E5 on chromosome 6, complete sequence	BX248109	52611	27	27	27	1	27	43290	43264	0
Serum_replicated	tRF-30-87R95RM3Y826	30	Human DNA sequence from clone DASS-179P20 on chromosome 6, complete sequence	BX088523	87597	27	27	27	1	27	86794	86768	0
Serum_replicated	tRF-30-87R95RM3Y826	30	Human DNA sequence from clone DASS-179P20 on chromosome 6, complete sequence	BX088523	87597	23	23	23	1	23	60513	60535	0
Serum_replicated	tRF-30-87R95RM3Y826	30	Human DNA sequence from clone DAQB-239N17 on chromosome 6, complete sequence	AL844539	98145	27	27	27	1	27	15882	15856	0
Serum_replicated	tRF-30-87R95RM3Y826	30	Human DNA sequence from clone DAQB-239N17 on chromosome 6, complete sequence	AL844539	98145	26	26	23	1	27	32985	32959	0
Serum_replicated	tRF-30-87R95RM3Y826	30	Human DNA sequence from clone DAQB-239N17 on chromosome 6, complete sequence	AL844539	98145	26	26	23	1	27	48468	48442	0
Serum_replicated	tRF-30-87R95RM3Y826	30	Human DNA sequence from clone DAQB-117O11 on chromosome 6, complete sequence	AL929561	181111	27	27	27	1	27	18614	18588	0
Serum_replicated	tRF-30-87R95RM3Y826	30	Human DNA sequence from clone CH502-419D21 on chromosome 6, complete sequence	AL901607	58752	27	27	27	1	27	43056	43030	0
Serum_replicated	tRF-30-87R95RM3Y826	30	Human DNA sequence from clone CH502-419D21 on chromosome 6, complete sequence	AL901607	58752	23	23	23	1	23	16745	16767	0
Serum_replicated	tRF-30-87R95RM3Y826	30	Human DNA sequence from clone CH501-308K3 on chromosome 6, complete sequence	AL662890	137288	27	27	27	1	27	61926	61900	0
Serum_replicated	tRF-30-87R95RM3Y826	30	Human DNA sequence from clone CH501-308K3 on chromosome 6, complete sequence	AL662890	137288	23	23	23	1	23	35611	35633	0
Serum_replicated	tRF-30-87R95RM3Y826	30	Human DNA sequence from clone CH501-308K3 on chromosome 6, complete sequence	AL662890	137288	26	26	23	1	27	79037	79011	0
Serum_replicated	tRF-30-87R95RM3Y826	30	Human DNA sequence from clone CH501-308K3 on chromosome 6, complete sequence	AL662890	137288	26	26	23	1	27	94520	94494	0
Serum_replicated	tRF-30-87R95RM3Y826	30	Human DNA sequence from clone CH502-216M5 on chromosome 6, complete sequence	AL662865	133757	27	27	27	1	27	52300	52274	0
Serum_replicated	tRF-30-87R95RM3Y826	30	Human DNA sequence from clone CH501-258E24 on chromosome 6, complete sequence	AL662791	134463	27	27	27	1	27	16430	16404	0
Serum_replicated	tRF-30-87R95RM3Y826	30	Human DNA sequence from clone RP1-25J6 on chromosome 6p21.3 Contains the 5' end of the RFP gene for ret finger protein, a putative novel gene, a KRT18 (keratin 18) pseudogene, a novel zinc finger protein gene, olfactory receptor 2AD1 pseudogene OR2AD1P, ESTs, STSs and 3 CpG islands, complete sequence	Z84476	112659	27	27	27	1	27	62698	62672	0
Serum_replicated	tRF-30-87R95RM3Y826	30	Human DNA sequence from clone RP11-124B17 on chromosome 13, complete sequence	AL139318	160004	27	27	27	1	27	123014	122988	0
Serum_replicated	tRF-30-87R95RM3Y826	30	Human DNA sequence from clone RP1-207F6 on chromosome 6 Contains the 3' end of the gene for a novel nucleolar protein NOP56 like protein, ESTs, STSs and GSSs, complete sequence	AL133258	73666	27	27	27	1	27	56459	56433	0
Serum_replicated	tRF-30-87R95RM3Y826	30	Human DNA sequence from clone RP1-207F6 on chromosome 6 Contains the 3' end of the gene for a novel nucleolar protein NOP56 like protein, ESTs, STSs and GSSs, complete sequence	AL133258	73666	23	23	23	1	23	30137	30159	0
Serum_replicated	tRF-30-87R95RM3Y826	30	Human DNA sequence from clone RP1-207F6 on chromosome 6 Contains the 3' end of the gene for a novel nucleolar protein NOP56 like protein, ESTs, STSs and GSSs, complete sequence	AL133258	73666	26	26	23	1	27	73560	73534	0
Serum_replicated	tRF-30-87R95RM3Y826	30	Human DNA sequence from clone DADB-29N8 on chromosome 6, complete sequence	CR759835	75398	27	27	27	1	27	6926	6900	0
Serum_replicated	tRF-30-87R95RM3Y826	30	Human DNA sequence from clone DAAP-223O5 on chromosome 6, complete sequence	CR759957	75014	27	27	27	1	27	817	791	0
Serum_replicated	tRF-30-87R95RM3Y826	30	Human DNA sequence from clone DAMA-52D19 on chromosome 6, complete sequence	BX927167	124344	27	27	27	1	27	44037	44011	0
Serum_replicated	tRF-30-87R95RM3Y826	30	Human DNA sequence from clone DAMA-184I15 on chromosome 6, complete sequence	BX908720	132528	27	27	27	1	27	48621	48595	0
Serum_replicated	tRF-30-87R95RM3Y826	30	Human DNA sequence from clone DAMA-184I15 on chromosome 6, complete sequence	BX908720	132528	23	23	23	1	23	22302	22324	0
Serum_replicated	tRF-30-87R95RM3Y826	30	Human DNA sequence from clone DAMA-184I15 on chromosome 6, complete sequence	BX908720	132528	26	26	23	1	27	65722	65696	0
Serum_replicated	tRF-30-87R95RM3Y826	30	Human DNA sequence from clone DAMA-184I15 on chromosome 6, complete sequence	BX908720	132528	26	26	23	1	27	81202	81176	0
Serum_replicated	tRF-30-87R95RM3Y826	30	Homo sapiens, clone IMAGE:4294479, mRNA	BC026095	2212	27	27	27	1	27	1969	1943	0
Serum_replicated	tRF-30-87R95RM3Y826	30	Homo sapiens genomic DNA, chromosome 11q clone:RP11-384C21, complete sequences	AP003778	183146	27	27	27	1	27	179647	179621	0
Serum_replicated	tRF-30-87R95RM3Y826	30	Homo sapiens chromosome 19, cosmid R34382, complete sequence	AC005329	34875	27	27	27	1	27	6997	6971	0
Serum_replicated	tRF-30-87R95RM3Y826	30	H.sapiens CpG island DNA genomic Mse1 fragment, clone 133g8, reverse read cpg133g8.rt1a	Z54557	293	27	27	27	2	28	118	92	0
Serum_replicated	tRF-30-87R95RM3Y826	30	Human Phe-tRNA and Lys-tRNA genes and Alu repeat, 5' end	M17620	2247	27	27	27	1	27	242	268	0
Serum_replicated	tRF-30-87R95RM3Y826	30	Homo sapiens chromosome 8, clone CTD-2017M22, complete sequence	AC093566	177522	28	28	25	2	30	78770	78742	0
Serum_replicated	tRF-30-87R95RM3Y826	30	H.sapiens CpG island DNA genomic Mse1 fragment, clone 187a12, forward read cpg187a12.ft1a	Z57613	243	27	27	25	1	28	121	94	0
Serum_replicated	tRF-30-87R95RM3Y826	30	Homo sapiens H3K27ac hESC enhancer GRCh37_chr11:59333399-59333898 (LOC127821125) on chromosome 11	NG_122582	700	26	26	23	1	27	581	555	0
Serum_replicated	tRF-30-87R95RM3Y826	30	PREDICTED: Homo sapiens long intergenic non-protein coding RNA 2739 (LINC02739), transcript variant X9, ncRNA	XR_007082138	1492	26	26	23	1	27	620	646	0
Serum_replicated	tRF-30-87R95RM3Y826	30	PREDICTED: Homo sapiens long intergenic non-protein coding RNA 2739 (LINC02739), transcript variant X4, ncRNA	XR_001748232	2359	26	26	23	1	27	620	646	0
Serum_replicated	tRF-30-87R95RM3Y826	30	TPA: Homo sapiens tRNA-Phe-GAA-5-1 gene	HG983969	73	23	23	23	1	23	47	69	0
Serum_replicated	tRF-30-87R95RM3Y826	30	TPA: Homo sapiens tRNA-Phe-GAA-4-1 gene	HG983968	74	26	26	23	1	27	48	74	0
Serum_replicated	tRF-30-87R95RM3Y826	30	TPA: Homo sapiens tRNA-Phe-GAA-3-1 gene	HG983967	73	26	26	23	1	27	47	73	0
Serum_replicated	tRF-30-87R95RM3Y826	30	TPA: Homo sapiens tRNA-Phe-GAA-2-1 gene >gi|634723207|tpe|HG984493.1| TPA: Mus musculus tRNA-Phe-GAA-3-1 gene	HG983966	73	26	26	23	1	27	47	73	0
Serum_replicated	tRF-30-87R95RM3Y826	30	Homo sapiens FOSMID clone ABC12-46839600K23 from chromosome 18, complete sequence	AC209559	33695	26	26	23	1	27	20962	20988	0
Serum_replicated	tRF-30-87R95RM3Y826	30	Human DNA sequence from clone DAMC-338N21 on chromosome 6, complete sequence	CR936879	44479	26	26	23	1	27	3852	3826	0
Serum_replicated	tRF-30-87R95RM3Y826	30	Human DNA sequence from clone CH502-57P4 on chromosome 6, complete sequence	AL669978	63505	26	26	23	1	27	3271	3245	0
Serum_replicated	tRF-30-87R95RM3Y826	30	Human DNA sequence from clone CH502-57P4 on chromosome 6, complete sequence	AL669978	63505	26	26	23	1	27	18755	18729	0
Serum_replicated	tRF-30-87R95RM3Y826	30	Human DNA sequence from clone RP1-111M5 on chromosome 6p21.3 Contains an RPL13 (60S Ribosomal protein L13, BBC1) pseudogene, a zinc finger protein pseudogene, the 3' end of the RFP gene for ret finger protein, four CpG islands, ESTs, STSs and GSSs, complete sequence	Z84474	107526	26	26	23	1	27	15477	15451	0
Serum_replicated	tRF-30-87R95RM3Y826	30	Homo sapiens genomic DNA, chromosome 11q, clone:CMB9-60A24, complete sequence	AP000442	117502	26	26	23	1	27	8021	7995	0
Serum_replicated	tRF-30-87R95RM3Y826	30	Human Phe-tRNA	M17622	625	26	26	23	1	27	310	336	0
Serum_replicated	tRF-30-87R95RM3Y826	30	Homo sapiens isolate CHM13 chromosome 18	CP068260	80542538	25	25	19	1	27	62647105	62647079	0
Serum_replicated	tRF-30-87R95RM3Y826	30	Homo sapiens isolate CHM13 chromosome 18	CP068260	80542538	18	18	15	12	30	61822269	61822251	0
Serum_replicated	tRF-30-87R95RM3Y826	30	Homo sapiens isolate CHM13 chromosome 18	CP068260	80542538	14	14	14	17	30	32191289	32191276	0
Serum_replicated	tRF-30-87R95RM3Y826	30	Homo sapiens isolate CHM13 chromosome 18	CP068260	80542538	17	17	14	13	30	58847461	58847478	0
Serum_replicated	tRF-30-87R95RM3Y826	30	Homo sapiens isolate CHM13 chromosome 18	CP068260	80542538	14	14	14	12	25	80062490	80062503	0
Serum_replicated	tRF-30-87R95RM3Y826	30	Homo sapiens DNA, chromosome 18, nearly complete genome	AP023478	77846715	25	25	19	1	27	59901604	59901578	0
Serum_replicated	tRF-30-87R95RM3Y826	30	Homo sapiens DNA, chromosome 18, nearly complete genome	AP023478	77846715	18	18	15	12	30	59076676	59076658	0
Serum_replicated	tRF-30-87R95RM3Y826	30	Homo sapiens DNA, chromosome 18, nearly complete genome	AP023478	77846715	14	14	14	17	30	29414510	29414497	0
Serum_replicated	tRF-30-87R95RM3Y826	30	Homo sapiens DNA, chromosome 18, nearly complete genome	AP023478	77846715	17	17	14	13	30	56102920	56102937	0
Serum_replicated	tRF-30-87R95RM3Y826	30	Homo sapiens DNA, chromosome 18, nearly complete genome	AP023478	77846715	14	14	14	12	25	77356613	77356626	0
Serum_replicated	tRF-30-87R95RM3Y826	30	Homo sapiens chromosome 18, clone RP11-120K19, complete sequence	AC064801	167843	25	25	19	1	27	12239	12213	0
Serum_replicated	tRF-30-87R95RM3Y826	30	Homo sapiens chromosome 18, clone RP11-640A1, complete sequence	AC100843	180160	25	25	19	1	27	12618	12644	0
Serum_replicated	tRF-30-87R95RM3Y826	30	H.sapiens CpG island DNA genomic Mse1 fragment, clone 133g8, forward read cpg133g8.ft1a	Z54556	259	19	19	19	1	19	241	259	0
Serum_replicated	tRF-30-87R95RM3Y826	30	Homo sapiens nuclear factor, erythroid 4 (NFE4), transcript variant 3, long non-coding RNA	NR_166512	1021	18	18	18	13	30	207	190	0
Serum_replicated	tRF-30-87R95RM3Y826	30	Homo sapiens nuclear factor, erythroid 4 (NFE4), transcript variant 4, long non-coding RNA	NR_166513	969	18	18	18	13	30	207	190	0
Serum_replicated	tRF-30-87R95RM3Y826	30	Homo sapiens nuclear factor, erythroid 4 (NFE4), transcript variant 2, long non-coding RNA	NR_166511	1337	18	18	18	13	30	207	190	0
Serum_replicated	tRF-30-87R95RM3Y826	30	Homo sapiens nuclear factor, erythroid 4 (NFE4), transcript variant 1, long non-coding RNA	NR_166510	1161	18	18	18	13	30	207	190	0
Serum_replicated	tRF-30-87R95RM3Y826	30	Homo sapiens chr5:104590996-104590985 non-reference unique insertion sequence	MH534406	1242	18	18	18	13	30	453	470	0
Serum_replicated	tRF-30-87R95RM3Y826	30	Homo sapiens clone 0746 breakpoint junction genomic sequence	KY504251	3615	18	18	18	13	30	531	548	0
Serum_replicated	tRF-30-87R95RM3Y826	30	Homo sapiens clone 0297 breakpoint junction genomic sequence	KY503802	1445	18	18	18	13	30	523	540	0
Serum_replicated	tRF-30-87R95RM3Y826	30	Homo sapiens clone 0172 breakpoint junction genomic sequence	KY503677	2801	18	18	18	13	30	2271	2254	0
Serum_replicated	tRF-30-87R95RM3Y826	30	Homo sapiens MED14-independent group 3 enhancer GRCh37_chr7:153109801-153111000 (LOC126860233) on chromosome 7	NG_084734	1400	18	18	18	13	30	1174	1191	0
Serum_replicated	tRF-30-87R95RM3Y826	30	Homo sapiens MED14-independent group 3 enhancer GRCh37_chr7:102613398-102614597 (LOC126860129) on chromosome 7	NG_084630	1400	18	18	18	13	30	786	769	0
Serum_replicated	tRF-30-87R95RM3Y826	30	Homo sapiens chromosome 7 clone 174779_ABC12_000047010200_F16, complete sequence	AC255539	38705	18	18	18	13	30	27059	27042	0
Serum_replicated	tRF-30-87R95RM3Y826	30	Homo sapiens testis expressed 16, pseudogene (TEX16P) on chromosome X	NG_023465	44762	18	18	18	13	30	21324	21307	0
Serum_replicated	tRF-30-87R95RM3Y826	30	Homo sapiens BAC clone RP11-645N11 from 7, complete sequence	AC073127	155842	18	18	18	13	30	49636	49619	0
Serum_replicated	tRF-30-87R95RM3Y826	30	Homo sapiens BAC clone RP11-774B15 from 7, complete sequence	AC073236	171012	18	18	18	13	30	165003	165020	0
Serum_replicated	tRF-30-87R95RM3Y826	30	Homo sapiens cDNA FLJ42291 fis, clone TLIVE2007528	AK124285	2624	18	18	18	13	30	175	158	0
Serum_replicated	tRF-30-87R95RM3Y826	30	Homo sapiens transcription factor NF-E4 mRNA, complete cds	AY258907	966	18	18	18	13	30	200	183	0
Serum_replicated	tRF-30-87R95RM3Y826	30	Homo sapiens, clone IMAGE:5404753, mRNA	BC036938	1096	18	18	18	13	30	126	109	0
Serum_replicated	tRF-30-87R95RM3Y826	30	Homo sapiens BAC clone RP11-722P15 from 4, complete sequence	AC096768	180430	18	18	18	13	30	127598	127615	0
Serum_replicated	tRF-30-87R95RM3Y826	30	Human DNA sequence from clone RP1-30P20 on chromosome Xq21.1-21.3, complete sequence	Z95126	176939	18	18	18	13	30	45007	44990	0
Serum_replicated	tRF-30-87R95RM3Y826	30	Homo sapiens chromosome 5 clone CTC-235M3, complete sequence	AC008390	121931	18	18	18	13	30	57219	57236	0
Serum_replicated	tRF-30-87R95RM3Y826	30	Human chromosome 14 DNA sequence BAC C-3059L23 of library CalTech-D from chromosome 14 of Homo sapiens (Human), complete sequence	AL352978	141450	18	18	18	13	30	36795	36778	0
Serum_replicated	tRF-30-87R95RM3Y826	30	Human chromosome 14 DNA sequence BAC C-3059L23 of library CalTech-D from chromosome 14 of Homo sapiens (Human), complete sequence	AL352978	141450	18	18	18	13	30	42948	42931	0
Serum_replicated	tRF-30-87R95RM3Y826	30	Human chromosome 14 DNA sequence BAC C-2273N11 of library CalTech-D from chromosome 14 of Homo sapiens (Human), complete sequence	AL359402	119296	18	18	18	13	30	116306	116289	0
Serum_replicated	tRF-30-87R95RM3Y826	30	Homo sapiens BAC clone RP11-736E3 from 7, complete sequence	AC073346	180651	20	20	17	10	30	170163	170183	0
Serum_replicated	tRF-30-87R95RM3Y826	30	Human DNA sequence from clone RP11-1086F11 on chromosome 1, complete sequence	AL591623	82383	17	17	17	14	30	64052	64068	0
Serum_replicated	tRF-30-87R95RM3Y826	30	Human DNA sequence from clone RP11-225H22 on chromosome 10, complete sequence	AL139339	103826	17	17	17	14	30	99274	99290	0
Serum_replicated	tRF-30-87R95RM3Y826	30	Homo sapiens BAC clone CH17-132O22 from chromosome 4, complete sequence	AC270106	213752	16	16	16	1	16	83506	83521	0
Serum_replicated	tRF-30-87R95RM3Y826	30	Homo sapiens BAC clone CH17-132O22 from chromosome 4, complete sequence	AC270106	213752	16	16	16	1	16	137376	137361	0
Serum_replicated	tRF-30-87R95RM3Y826	30	Homo sapiens BAC clone CH17-180E5 from chromosome 11, complete sequence	AC270086	234806	16	16	16	15	30	165899	165884	0
Serum_replicated	tRF-30-87R95RM3Y826	30	Homo sapiens BAC clone CH17-358O3 from chromosome 4, complete sequence	AC256206	196508	16	16	16	1	16	145094	145109	0
Serum_replicated	tRF-30-87R95RM3Y826	30	Homo sapiens isolate CHM13 chromosome 22	CP068256	51324926	16	16	16	1	16	7559372	7559387	0
Serum_replicated	tRF-30-87R95RM3Y826	30	Homo sapiens isolate CHM13 chromosome 21	CP068257	45090682	16	16	16	1	16	6547723	6547708	0
Serum_replicated	tRF-30-87R95RM3Y826	30	Homo sapiens isolate CHM13 chromosome 21	CP068257	45090682	14	14	14	17	30	21995702	21995715	0
Serum_replicated	tRF-30-87R95RM3Y826	30	Homo sapiens isolate CHM13 chromosome 15	CP068263	99753195	16	16	16	1	16	4757826	4757811	0
Serum_replicated	tRF-30-87R95RM3Y826	30	Homo sapiens zinc finger protein 195 (ZNF195), RefSeqGene on chromosome 11	NG_032109	28296	16	16	16	15	30	26355	26340	0
Serum_replicated	tRF-30-87R95RM3Y826	30	Homo sapiens FOSMID clone ABC12-47031800A7 from chromosome 4, complete sequence	AC242189	40949	16	16	16	1	16	34465	34480	0
Serum_replicated	tRF-30-87R95RM3Y826	30	Homo sapiens FOSMID clone ABC13-47478300F9 from chromosome unknown, complete sequence	AC240967	40422	16	16	16	15	30	4540	4525	0
Serum_replicated	tRF-30-87R95RM3Y826	30	Homo sapiens FOSMID clone ABC16-1123J8 from chromosome 4, complete sequence	AC240563	39190	16	16	16	1	16	20418	20403	0
Serum_replicated	tRF-30-87R95RM3Y826	30	Homo sapiens FOSMID clone ABC11-47323000F5 from chromosome unknown, complete sequence	AC229660	37803	16	16	16	1	16	14949	14934	0
Serum_replicated	tRF-30-87R95RM3Y826	30	Homo sapiens FOSMID clone ABC13-47497000C14 from chromosome 4, complete sequence	AC234452	41602	16	16	16	1	16	34501	34516	0
Serum_replicated	tRF-30-87R95RM3Y826	30	Homo sapiens FOSMID clone ABC12-49097400K16 from chromosome unknown, complete sequence	AC223427	40745	16	16	16	1	16	25410	25395	0
Serum_replicated	tRF-30-87R95RM3Y826	30	Homo sapiens chromosome 4 clone WI2-2162J8, complete sequence	AC196526	43604	16	16	16	1	16	5474	5459	0
Serum_replicated	tRF-30-87R95RM3Y826	30	Homo sapiens BAC clone RP11-1281K21 from 4, complete sequence	AC118282	208765	16	16	16	1	16	203687	203702	0
Urine EV replicated	tRF-16-F1R3WEE	16	Homo sapiens H3K27ac-H3K4me1 hESC enhancer GRCh37_chr1:161417401-161418284 (LOC127270664) on chromosome 1	NG_092516	1084	16	16	32	1	16	761	746	0
Urine EV replicated	tRF-16-F1R3WEE	16	PREDICTED: Homo sapiens uncharacterized LOC105375001 (LOC105375001), transcript variant X2, ncRNA	XR_007076674	5888	16	16	32	1	16	4810	4825	0
Urine EV replicated	tRF-16-F1R3WEE	16	Homo sapiens LHRI_LNC2547.1 lncRNA, complete sequence	MW804024	421	16	16	32	1	16	181	196	0
Urine EV replicated	tRF-16-F1R3WEE	16	TPA: Homo sapiens tRNA-Asp-GTC-4-1 gene	HG983677	72	16	16	32	1	16	44	59	0
Urine EV replicated	tRF-16-F1R3WEE	16	TPA: Homo sapiens tRNA-Asp-GTC-3-1 gene	HG983676	72	16	16	32	1	16	44	59	0
Urine EV replicated	tRF-16-F1R3WEE	16	TPA: Homo sapiens tRNA-Asp-GTC-2-1 gene >gi|634721645|tpe|HG983666.1| TPA: Homo sapiens tRNA-Asp-GTC-2-2 gene >gi|634721648|tpe|HG983667.1| TPA: Homo sapiens tRNA-Asp-GTC-2-3 gene >gi|634721650|tpe|HG983668.1| TPA: Homo sapiens tRNA-Asp-GTC-2-4 gene >gi|634721653|tpe|HG983669.1| TPA: Homo sapiens tRNA-Asp-GTC-2-5 gene >gi|634721655|tpe|HG983670.1| TPA: Homo sapiens tRNA-Asp-GTC-2-8 gene >gi|63472…	HG983665	72	16	16	32	1	16	44	59	0
Urine EV replicated	tRF-16-F1R3WEE	16	Homo sapiens isolate CHM13 chromosome 17	CP068261	84276897	16	16	32	1	16	8128494	8128479	0
Urine EV replicated	tRF-16-F1R3WEE	16	Homo sapiens BAC clone CH17-437O13 from chromosome 1, complete sequence	AC243971	241302	16	16	32	1	16	4935	4920	0
Urine EV replicated	tRF-16-F1R3WEE	16	Homo sapiens BAC clone CH17-282E19 from chromosome 1, complete sequence	AC244471	204059	16	16	32	1	16	2465	2480	0
Urine EV replicated	tRF-16-F1R3WEE	16	Homo sapiens BAC clone CH17-282E19 from chromosome 1, complete sequence	AC244471	204059	16	16	32	1	16	11748	11763	0
Urine EV replicated	tRF-16-F1R3WEE	16	Homo sapiens DNA, chromosome 17, nearly complete genome	AP023477	80688777	16	16	32	1	16	8305257	8305242	0
Urine EV replicated	tRF-16-F1R3WEE	16	Homo sapiens BAC clone CH17-135E1 from chromosome 1, complete sequence	AC243509	129689	16	16	32	1	16	7574	7559	0
Urine EV replicated	tRF-16-F1R3WEE	16	Homo sapiens BAC clone CH17-135E1 from chromosome 1, complete sequence	AC243509	129689	16	16	32	1	16	22374	22359	0
Urine EV replicated	tRF-16-F1R3WEE	16	Homo sapiens BAC clone CH17-220A1 from chromosome 1, complete sequence	AC243546	112430	16	16	32	1	16	36808	36823	0
Urine EV replicated	tRF-16-F1R3WEE	16	Homo sapiens BAC clone CH17-220A1 from chromosome 1, complete sequence	AC243546	112430	16	16	32	1	16	77276	77291	0
Urine EV replicated	tRF-16-F1R3WEE	16	Homo sapiens BAC clone CH17-220A1 from chromosome 1, complete sequence	AC243546	112430	16	16	32	1	16	91415	91430	0
Urine EV replicated	tRF-16-F1R3WEE	16	Homo sapiens FOSMID clone COR2A-DD0002RZJNU_O5 from chromosome 1, complete sequence	AC243811	33627	16	16	32	1	16	28792	28777	0
Urine EV replicated	tRF-16-F1R3WEE	16	Homo sapiens FOSMID clone ABC9-43348300F22 from chromosome 1, complete sequence	AC212909	36847	16	16	32	1	16	19645	19630	0
Urine EV replicated	tRF-16-F1R3WEE	16	Homo sapiens FOSMID clone ABC9-43348300F22 from chromosome 1, complete sequence	AC212909	36847	16	16	32	1	16	27062	27047	0
Urine EV replicated	tRF-16-F1R3WEE	16	Homo sapiens FOSMID clone ABC9-43348300F22 from chromosome 1, complete sequence	AC212909	36847	16	16	32	1	16	34420	34405	0
Urine EV replicated	tRF-16-F1R3WEE	16	Homo sapiens RNA, tRNaseZL-interacting RNA A11	AB330779	31	16	16	32	1	16	5	20	0
Urine EV replicated	tRF-16-F1R3WEE	16	Homo sapiens RNA, tRNaseZL-interacting RNA A6	AB330774	39	16	16	32	1	16	12	27	0
Urine EV replicated	tRF-16-F1R3WEE	16	Homo sapiens FOSMID clone ABC9-41270100I10 from chromosome unknown, complete sequence	AC234785	40960	16	16	32	1	16	36679	36694	0
Urine EV replicated	tRF-16-F1R3WEE	16	Homo sapiens FOSMID clone ABC10-45493400M8 from chromosome unknown, complete sequence	AC235029	40550	16	16	32	1	16	36631	36646	0
Urine EV replicated	tRF-16-F1R3WEE	16	Homo sapiens FOSMID clone ABC9-43843900G11 from chromosome 1, complete sequence	AC211967	39767	16	16	32	1	16	4207	4192	0
Urine EV replicated	tRF-16-F1R3WEE	16	Homo sapiens FOSMID clone ABC9-43843900G11 from chromosome 1, complete sequence	AC211967	39767	16	16	32	1	16	11621	11606	0
Urine EV replicated	tRF-16-F1R3WEE	16	Homo sapiens FOSMID clone ABC9-43843900G11 from chromosome 1, complete sequence	AC211967	39767	16	16	32	1	16	19023	19008	0
Urine EV replicated	tRF-16-F1R3WEE	16	Homo sapiens cDNA FLJ57265 complete cds, highly similar to Neurotrimin precursor	AK294137	1427	16	16	32	1	16	6	21	0
Urine EV replicated	tRF-16-F1R3WEE	16	Homo sapiens FOSMID clone ABC9-44043600G17 from chromosome 1, complete sequence	AC207076	40742	16	16	32	1	16	6076	6091	0
Urine EV replicated	tRF-16-F1R3WEE	16	Homo sapiens 12q22 BAC RPCI11-256L6 (Roswell Park Cancer Institute Human BAC Library) complete sequence	AC007298	201572	16	16	32	1	16	145323	145308	0
Urine EV replicated	tRF-16-F1R3WEE	16	Homo sapiens cDNA FLJ46625 fis, clone TLUNG2002578	AK128480	1895	16	16	32	1	16	6	21	0
Urine EV replicated	tRF-16-F1R3WEE	16	Human DNA sequence from clone RP11-5K23 on chromosome 1, complete sequence	AL590385	129505	16	16	32	1	16	4930	4915	0
Urine EV replicated	tRF-16-F1R3WEE	16	Human DNA sequence from clone RP11-5K23 on chromosome 1, complete sequence	AL590385	129505	16	16	32	1	16	12311	12296	0
Urine EV replicated	tRF-16-F1R3WEE	16	Human DNA sequence from clone RP11-5K23 on chromosome 1, complete sequence	AL590385	129505	16	16	32	1	16	19721	19706	0
Urine EV replicated	tRF-16-F1R3WEE	16	Human DNA sequence from clone RP11-5K23 on chromosome 1, complete sequence	AL590385	129505	16	16	32	1	16	27102	27087	0
Urine EV replicated	tRF-16-F1R3WEE	16	Human DNA sequence from clone RP13-389K14 on chromosome 1, complete sequence	AL831711	8801	16	16	32	1	16	4331	4316	0
Urine EV replicated	tRF-16-F1R3WEE	16	Human DNA sequence from clone RP11-197P3 on chromosome 9, complete sequence	AL158825	127399	16	16	32	1	16	1582	1567	0
Urine EV replicated	tRF-16-F1R3WEE	16	Human DNA sequence from clone SCb-34I8 on chromosome 6p21.3-22.1, complete sequence	AL021918	159506	16	16	32	1	16	28625	28640	0
Urine EV replicated	tRF-16-F1R3WEE	16	Human DNA sequence from clone SCb-34I8 on chromosome 6p21.3-22.1, complete sequence	AL021918	159506	16	16	32	1	16	52695	52710	0
Urine EV replicated	tRF-16-F1R3WEE	16	Human DNA sequence from clone SCb-34I8 on chromosome 6p21.3-22.1, complete sequence	AL021918	159506	16	16	32	1	16	132393	132378	0
Urine EV replicated	tRF-16-F1R3WEE	16	Homo sapiens chromosome 17, clone RP11-849F2, complete sequence	AC135178	188340	16	16	32	1	16	162317	162332	0
Urine EV replicated	tRF-16-F1R3WEE	16	Homo sapiens 12 BAC RP11-549I9 (Roswell Park Cancer Institute Human BAC Library) complete sequence	AC093719	79925	16	16	32	1	16	67892	67907	0
Urine EV replicated	tRF-16-F1R3WEE	16	Homo sapiens 12 BAC RP11-592O2 (Roswell Park Cancer Institute Human BAC Library) complete sequence	AC126309	121984	16	16	32	1	16	119710	119695	0
Urine EV replicated	tRF-16-F1R3WEE	16	Homo sapiens cDNA FLJ20583 fis, clone KAT09685 >gi|62897804|dbj|AK223122.1| Homo sapiens mRNA for Cohen syndrome 1 protein isoform 4 variant, clone: KAT09685	AK000590	1673	16	16	32	1	16	5	20	0
Urine EV replicated	tRF-16-F1R3WEE	16	Homo sapiens tRNA-Asp gene, complete sequence	AF037471	410	16	16	32	1	16	356	371	0
Urine EV replicated	tRF-16-F1R3WEE	16	Homo sapiens leukotriene A4 hydrolase (LTA4) gene, promoter region and partial cds	U65080	2242	16	16	32	1	16	1695	1680	0
Urine EV replicated	tRF-16-F1R3WEE	16	H.sapiens CpG island DNA genomic Mse1 fragment, clone 34b11, forward read cpg34b11.ft1a	Z60777	285	16	16	32	1	16	52	37	0
Urine EV replicated	tRF-16-F1R3WEE	16	H.sapiens CpG island DNA genomic Mse1 fragment, clone 50a4, forward read cpg50a4.ft1a	Z58783	197	16	16	32	1	16	38	23	0
Urine EV replicated	tRF-16-F1R3WEE	16	Homo sapiens genomic sequence surrounding NotI site, clone NR5-GI6C	AJ331685	764	15	15	30	1	15	314	300	0
Urine EV replicated	tRF-16-F1R3WEE	16	Homo sapiens chromosome 5 clone VMRC59-364P20, complete sequence	AC278615	165013	14	14	28	3	16	148374	148387	0
Urine EV replicated	tRF-16-F1R3WEE	16	Homo sapiens B double prime 1, subunit of RNA polymerase III transcription initiation factor IIIB (BDP1), RefSeqGene on chromosome 5	NG_047017	132680	14	14	28	3	16	37304	37317	0
Urine EV replicated	tRF-16-F1R3WEE	16	Homo sapiens isolate CHM13 chromosome 19	CP068259	61707364	14	14	28	1	14	49339464	49339477	0
Urine EV replicated	tRF-16-F1R3WEE	16	Homo sapiens isolate CHM13 chromosome 18	CP068260	80542538	14	14	28	1	14	63261957	63261944	0
Urine EV replicated	tRF-16-F1R3WEE	16	Chain x, E-site tRNA >gi|1979418401|pdb|6I7O|m Chain m, E-site tRNA >gi|1979438695|pdb|6Q8Y|m Chain m, E-site tRNA >gi|1979444196|pdb|6T4Q|7 Chain 7, tRNA (E/E) >gi|1979444410|pdb|6T7I|7 Chain 7, tRNA (E-site) >gi|2015436043|pdb|6Z6L|CC Chain CC, tRNA >gi|2015436226|pdb|6Z6N|CC Chain CC, tRNA >gi|2015437062|pdb|6ZM7|CC Chain CC, tRNA >gi|2015437153|pdb|6ZME|CC Chain CC, tRNA >gi|2015437249|pdb|6Z…	6ZVH_x	75	14	14	28	1	14	44	57	0
Urine EV replicated	tRF-16-F1R3WEE	16	Homo sapiens BAC clone CH17-468I21 from chromosome 5, complete sequence	AC245931	210760	14	14	28	3	16	13603	13590	0
Urine EV replicated	tRF-16-F1R3WEE	16	Homo sapiens DNA, chromosome 19, nearly complete genome	AP023479	59105444	14	14	28	1	14	46676924	46676937	0
Urine EV replicated	tRF-16-F1R3WEE	16	Homo sapiens chromosome 5 clone RP11-615D2, complete sequence	AC138908	201419	14	14	28	3	16	108324	108311	0
Urine EV replicated	tRF-16-F1R3WEE	16	Homo sapiens chromosome 19 clone CTB-158D10, complete sequence	AC011484	112351	14	14	28	1	14	96210	96223	0
Urine EV replicated	tRF-16-F1R3WEE	16	Homo sapiens chromosome 5 clone CTD-2173D20, complete sequence	AC008851	130416	14	14	28	3	16	88986	88973	0
Urine EV replicated	tRF-16-F1R3WEE	16	Homo sapiens chromosome 5 clone RP11-1308P14, complete sequence	AC138850	188885	14	14	28	3	16	13241	13228	0
Urine EV replicated	tRF-16-F1R3WEE	16	Homo sapiens chromosome 5 clone RP11-1174L13, complete sequence	AC138832	225384	14	14	28	3	16	98627	98640	0
Urine EV replicated	tRF-16-F1R3WEE	16	Homo sapiens chromosome 5 clone RP11-214M1, complete sequence	AC108106	160701	14	14	28	3	16	148305	148318	0
Urine EV replicated	tRF-16-F1R3WEE	16	Homo sapiens chromosome 5 clone RP11-800G17, complete sequence	AC138948	172404	14	14	28	3	16	101105	101092	0
Urine EV replicated	tRF-16-F1R3WEE	16	Homo sapiens chromosome 5 clone RP11-1099E10, complete sequence	AC138817	185785	14	14	28	3	16	83652	83639	0
Urine EV replicated	tRF-16-F1R3WEE	16	Homo sapiens genomic sequence surrounding NotI site, clone NL1-ZF11RS	AJ331802	841	14	14	28	2	15	84	97	0
Urine EV replicated	tRF-17-8R6546J	17	Homo sapiens cell line MHC_SSTO major histocompatibility complex genomic sequence	OK649236	5046869	17	17	34	1	17	97025	97041	0
Urine EV replicated	tRF-17-8R6546J	17	Homo sapiens cell line MHC_SSTO major histocompatibility complex genomic sequence	OK649236	5046869	15	15	30	1	15	211493	211507	0
Urine EV replicated	tRF-17-8R6546J	17	Homo sapiens cell line MHC_SSTO major histocompatibility complex genomic sequence	OK649236	5046869	15	15	30	1	15	250155	250141	0
Urine EV replicated	tRF-17-8R6546J	17	Homo sapiens cell line MHC_SSTO major histocompatibility complex genomic sequence	OK649236	5046869	15	15	30	1	15	281565	281551	0
Urine EV replicated	tRF-17-8R6546J	17	Homo sapiens cell line MHC_SSTO major histocompatibility complex genomic sequence	OK649236	5046869	15	15	30	1	15	330167	330153	0
Urine EV replicated	tRF-17-8R6546J	17	Homo sapiens cell line MHC_SSTO major histocompatibility complex genomic sequence	OK649236	5046869	15	15	30	1	15	355415	355401	0
Urine EV replicated	tRF-17-8R6546J	17	Homo sapiens cell line MHC_QBL major histocompatibility complex genomic sequence	OK649235	4904957	17	17	34	1	17	97038	97054	0
Urine EV replicated	tRF-17-8R6546J	17	Homo sapiens cell line MHC_QBL major histocompatibility complex genomic sequence	OK649235	4904957	15	15	30	1	15	211853	211867	0
Urine EV replicated	tRF-17-8R6546J	17	Homo sapiens cell line MHC_QBL major histocompatibility complex genomic sequence	OK649235	4904957	15	15	30	1	15	250470	250456	0
Urine EV replicated	tRF-17-8R6546J	17	Homo sapiens cell line MHC_QBL major histocompatibility complex genomic sequence	OK649235	4904957	15	15	30	1	15	281871	281857	0
Urine EV replicated	tRF-17-8R6546J	17	Homo sapiens cell line MHC_QBL major histocompatibility complex genomic sequence	OK649235	4904957	15	15	30	1	15	330524	330510	0
Urine EV replicated	tRF-17-8R6546J	17	Homo sapiens cell line MHC_QBL major histocompatibility complex genomic sequence	OK649235	4904957	15	15	30	1	15	355779	355765	0
Urine EV replicated	tRF-17-8R6546J	17	Homo sapiens cell line MHC_MANN major histocompatibility complex genomic sequence	OK649234	5025632	17	17	34	1	17	97059	97075	0
Urine EV replicated	tRF-17-8R6546J	17	Homo sapiens cell line MHC_MANN major histocompatibility complex genomic sequence	OK649234	5025632	15	15	30	1	15	212069	212083	0
Urine EV replicated	tRF-17-8R6546J	17	Homo sapiens cell line MHC_MANN major histocompatibility complex genomic sequence	OK649234	5025632	15	15	30	1	15	250684	250670	0
Urine EV replicated	tRF-17-8R6546J	17	Homo sapiens cell line MHC_MANN major histocompatibility complex genomic sequence	OK649234	5025632	15	15	30	1	15	282094	282080	0
Urine EV replicated	tRF-17-8R6546J	17	Homo sapiens cell line MHC_MANN major histocompatibility complex genomic sequence	OK649234	5025632	15	15	30	1	15	330767	330753	0
Urine EV replicated	tRF-17-8R6546J	17	Homo sapiens cell line MHC_MANN major histocompatibility complex genomic sequence	OK649234	5025632	15	15	30	1	15	356007	355993	0
Urine EV replicated	tRF-17-8R6546J	17	Homo sapiens cell line MHC_KAS116 major histocompatibility complex genomic sequence	OK649233	4911494	17	17	34	1	17	97119	97135	0
Urine EV replicated	tRF-17-8R6546J	17	Homo sapiens cell line MHC_KAS116 major histocompatibility complex genomic sequence	OK649233	4911494	15	15	30	1	15	211630	211644	0
Urine EV replicated	tRF-17-8R6546J	17	Homo sapiens cell line MHC_KAS116 major histocompatibility complex genomic sequence	OK649233	4911494	15	15	30	1	15	250289	250275	0
Urine EV replicated	tRF-17-8R6546J	17	Homo sapiens cell line MHC_KAS116 major histocompatibility complex genomic sequence	OK649233	4911494	15	15	30	1	15	281713	281699	0
Urine EV replicated	tRF-17-8R6546J	17	Homo sapiens cell line MHC_KAS116 major histocompatibility complex genomic sequence	OK649233	4911494	15	15	30	1	15	330329	330315	0
Urine EV replicated	tRF-17-8R6546J	17	Homo sapiens cell line MHC_KAS116 major histocompatibility complex genomic sequence	OK649233	4911494	15	15	30	1	15	355597	355583	0
Urine EV replicated	tRF-17-8R6546J	17	Homo sapiens cell line MHC_DBB major histocompatibility complex genomic sequence	OK649232	5048538	17	17	34	1	17	97074	97090	0
Urine EV replicated	tRF-17-8R6546J	17	Homo sapiens cell line MHC_DBB major histocompatibility complex genomic sequence	OK649232	5048538	15	15	30	1	15	211989	212003	0
Urine EV replicated	tRF-17-8R6546J	17	Homo sapiens cell line MHC_DBB major histocompatibility complex genomic sequence	OK649232	5048538	15	15	30	1	15	250634	250620	0
Urine EV replicated	tRF-17-8R6546J	17	Homo sapiens cell line MHC_DBB major histocompatibility complex genomic sequence	OK649232	5048538	15	15	30	1	15	282010	281996	0
Urine EV replicated	tRF-17-8R6546J	17	Homo sapiens cell line MHC_DBB major histocompatibility complex genomic sequence	OK649232	5048538	15	15	30	1	15	330674	330660	0
Urine EV replicated	tRF-17-8R6546J	17	Homo sapiens cell line MHC_DBB major histocompatibility complex genomic sequence	OK649232	5048538	15	15	30	1	15	355911	355897	0
Urine EV replicated	tRF-17-8R6546J	17	Homo sapiens cell line MHC_APD major histocompatibility complex genomic sequence	OK649231	4929193	17	17	34	1	17	97081	97097	0
Urine EV replicated	tRF-17-8R6546J	17	Homo sapiens cell line MHC_APD major histocompatibility complex genomic sequence	OK649231	4929193	15	15	30	1	15	211827	211841	0
Urine EV replicated	tRF-17-8R6546J	17	Homo sapiens cell line MHC_APD major histocompatibility complex genomic sequence	OK649231	4929193	15	15	30	1	15	250493	250479	0
Urine EV replicated	tRF-17-8R6546J	17	Homo sapiens cell line MHC_APD major histocompatibility complex genomic sequence	OK649231	4929193	15	15	30	1	15	281916	281902	0
Urine EV replicated	tRF-17-8R6546J	17	Homo sapiens cell line MHC_APD major histocompatibility complex genomic sequence	OK649231	4929193	15	15	30	1	15	330606	330592	0
Urine EV replicated	tRF-17-8R6546J	17	Homo sapiens cell line MHC_APD major histocompatibility complex genomic sequence	OK649231	4929193	15	15	30	1	15	355855	355841	0
Urine EV replicated	tRF-17-8R6546J	17	Human DNA sequence from clone CH502-254L4 on chromosome 6, complete sequence	AL671879	176995	17	17	34	1	17	33702	33718	0
Urine EV replicated	tRF-17-8R6546J	17	Human DNA sequence from clone CH502-254L4 on chromosome 6, complete sequence	AL671879	176995	15	15	30	1	15	147053	147067	0
Urine EV replicated	tRF-17-8R6546J	17	Human DNA sequence from clone RP11-373N24 on chromosome 6, complete sequence	AL121932	85952	17	17	34	1	17	1700	1716	0
Urine EV replicated	tRF-17-8R6546J	17	Homo sapiens chromosome 16 clone CH17-172N3, complete sequence	AC277943	138038	16	16	32	2	17	82079	82094	0
Urine EV replicated	tRF-17-8R6546J	17	Homo sapiens chromosome 16 clone CH17-55N16, complete sequence	AC277974	216215	16	16	32	2	17	21489	21504	0
Urine EV replicated	tRF-17-8R6546J	17	Homo sapiens H3K27ac-H3K4me1 hESC enhancer GRCh37_chr13:114813561-114814350 (LOC127827144) on chromosome 13	NG_128648	990	16	16	32	2	17	889	874	0
Urine EV replicated	tRF-17-8R6546J	17	Homo sapiens isolate CHM13 chromosome 16	CP068262	96330374	16	16	32	2	17	29157041	29157026	0
Urine EV replicated	tRF-17-8R6546J	17	Homo sapiens isolate CHM13 chromosome 16	CP068262	96330374	15	15	30	3	17	56818982	56818968	0
Urine EV replicated	tRF-17-8R6546J	17	Homo sapiens isolate CHM13 chromosome 16	CP068262	96330374	15	15	30	2	16	92648616	92648602	0
Urine EV replicated	tRF-17-8R6546J	17	Homo sapiens isolate CHM13 chromosome 16	CP068262	96330374	16	16	29	1	17	28315337	28315321	0
Urine EV replicated	tRF-17-8R6546J	17	Homo sapiens isolate CHM13 chromosome 16	CP068262	96330374	14	14	28	3	16	25373509	25373496	0
Urine EV replicated	tRF-17-8R6546J	17	Homo sapiens isolate CHM13 chromosome 16	CP068262	96330374	14	14	28	3	16	94511302	94511315	0
Urine EV replicated	tRF-17-8R6546J	17	Homo sapiens DNA, chromosome 16, nearly complete genome	AP023476	94690957	16	16	32	2	17	27653003	27652988	0
Urine EV replicated	tRF-17-8R6546J	17	Homo sapiens DNA, chromosome 16, nearly complete genome	AP023476	94690957	15	15	30	3	17	55417938	55417924	0
Urine EV replicated	tRF-17-8R6546J	17	Homo sapiens DNA, chromosome 16, nearly complete genome	AP023476	94690957	15	15	30	2	16	91116313	91116299	0
Urine EV replicated	tRF-17-8R6546J	17	Homo sapiens DNA, chromosome 16, nearly complete genome	AP023476	94690957	16	16	29	1	17	26912122	26912106	0
Urine EV replicated	tRF-17-8R6546J	17	Homo sapiens DNA, chromosome 16, nearly complete genome	AP023476	94690957	14	14	28	3	16	23968751	23968738	0
Urine EV replicated	tRF-17-8R6546J	17	Homo sapiens DNA, chromosome 16, nearly complete genome	AP023476	94690957	14	14	28	3	16	92981144	92981157	0
Urine EV replicated	tRF-17-8R6546J	17	Homo sapiens ATPase sarcoplasmic/endoplasmic reticulum Ca2+ transporting 1 (ATP2A1), RefSeqGene on chromosome 16	NG_023327	33022	16	16	32	2	17	3054	3039	0
Urine EV replicated	tRF-17-8R6546J	17	Homo sapiens chromosome 16 clone RP11-22P6, complete sequence	AC133550	58207	16	16	32	2	17	11301	11316	0
Urine EV replicated	tRF-17-8R6546J	17	Homo sapiens chromosome 16 clone RP11-264B17, complete sequence	AC109460	163424	16	16	32	2	17	9103	9088	0
Urine EV replicated	tRF-17-8R6546J	17	Human DNA sequence from clone RP11-245B11 on chromosome 13, complete sequence	AL161774	162296	16	16	32	2	17	61941	61926	0
Urine EV replicated	tRF-17-8R6546J	17	Homo sapiens chromosome 16 clone CTD-2555L18, complete sequence	AC135783	224150	16	16	32	2	17	4793	4808	0
Urine EV replicated	tRF-17-8R6546J	17	Homo sapiens CRISPRi-validated cis-regulatory element chr6.1371 (LOC116183053) on chromosome 6	NG_066783	469	15	15	30	1	15	199	213	0
Urine EV replicated	tRF-17-8R6546J	17	Homo sapiens forkhead box L1 (FOXL1), mRNA	NM_005250	4930	15	15	30	2	16	1757	1743	0
Urine EV replicated	tRF-17-8R6546J	17	Homo sapiens plexin B1 (PLXNB1), transcript variant 2, mRNA	NM_001130082	7178	15	15	30	3	17	3578	3564	0
Urine EV replicated	tRF-17-8R6546J	17	Homo sapiens zinc finger DHHC-type palmitoyltransferase 18 (ZDHHC18), mRNA	NM_032283	5045	15	15	30	3	17	4366	4380	0
Urine EV replicated	tRF-17-8R6546J	17	Homo sapiens G protein-coupled receptor 153 (GPR153), RefSeqGene on chromosome 1	NG_053044	20645	15	15	30	1	15	7514	7528	0
Urine EV replicated	tRF-17-8R6546J	17	PREDICTED: Homo sapiens plexin B1 (PLXNB1), transcript variant X8, mRNA	XM_011533837	7294	15	15	30	3	17	3691	3677	0
Urine EV replicated	tRF-17-8R6546J	17	PREDICTED: Homo sapiens uncharacterized LOC105378654 (LOC105378654), transcript variant X1, ncRNA	XR_001737986	3583	15	15	30	3	17	3283	3269	0
Urine EV replicated	tRF-17-8R6546J	17	PREDICTED: Homo sapiens uncharacterized LOC105378654 (LOC105378654), transcript variant X5, ncRNA	XR_001737985	4140	15	15	30	3	17	3840	3826	0
Urine EV replicated	tRF-17-8R6546J	17	PREDICTED: Homo sapiens plexin B1 (PLXNB1), transcript variant X16, mRNA	XM_054346898	8933	15	15	30	3	17	7376	7362	0
Urine EV replicated	tRF-17-8R6546J	17	PREDICTED: Homo sapiens plexin B1 (PLXNB1), transcript variant X15, misc_RNA	XR_008486736	10409	15	15	30	3	17	7369	7355	0
Urine EV replicated	tRF-17-8R6546J	17	PREDICTED: Homo sapiens plexin B1 (PLXNB1), transcript variant X10, mRNA	XM_054346897	7254	15	15	30	3	17	3654	3640	0
Urine EV replicated	tRF-17-8R6546J	17	PREDICTED: Homo sapiens plexin B1 (PLXNB1), transcript variant X14, mRNA	XM_054346896	7178	15	15	30	3	17	3578	3564	0
Urine EV replicated	tRF-17-8R6546J	17	PREDICTED: Homo sapiens plexin B1 (PLXNB1), transcript variant X13, mRNA	XM_054346895	7753	15	15	30	3	17	4153	4139	0
Urine EV replicated	tRF-17-8R6546J	17	PREDICTED: Homo sapiens plexin B1 (PLXNB1), transcript variant X12, mRNA	XM_054346894	7214	15	15	30	3	17	3614	3600	0
Urine EV replicated	tRF-17-8R6546J	17	PREDICTED: Homo sapiens plexin B1 (PLXNB1), transcript variant X11, mRNA	XM_054346893	7428	15	15	30	3	17	3828	3814	0
Urine EV replicated	tRF-17-8R6546J	17	PREDICTED: Homo sapiens plexin B1 (PLXNB1), transcript variant X8, mRNA	XM_054346892	7294	15	15	30	3	17	3691	3677	0
Urine EV replicated	tRF-17-8R6546J	17	PREDICTED: Homo sapiens plexin B1 (PLXNB1), transcript variant X7, mRNA	XM_054346891	7181	15	15	30	3	17	3578	3564	0
Urine EV replicated	tRF-17-8R6546J	17	PREDICTED: Homo sapiens plexin B1 (PLXNB1), transcript variant X6, mRNA	XM_054346890	7198	15	15	30	3	17	3595	3581	0
Urine EV replicated	tRF-17-8R6546J	17	PREDICTED: Homo sapiens plexin B1 (PLXNB1), transcript variant X5, mRNA	XM_054346889	7757	15	15	30	3	17	4154	4140	0
Urine EV replicated	tRF-17-8R6546J	17	PREDICTED: Homo sapiens plexin B1 (PLXNB1), transcript variant X4, mRNA	XM_054346888	10971	15	15	30	3	17	7368	7354	0
Urine EV replicated	tRF-17-8R6546J	17	PREDICTED: Homo sapiens plexin B1 (PLXNB1), transcript variant X3, mRNA	XM_054346887	7151	15	15	30	3	17	3548	3534	0
Urine EV replicated	tRF-17-8R6546J	17	PREDICTED: Homo sapiens plexin B1 (PLXNB1), transcript variant X2, mRNA	XM_054346886	7194	15	15	30	3	17	3591	3577	0
Urine EV replicated	tRF-17-8R6546J	17	PREDICTED: Homo sapiens plexin B1 (PLXNB1), transcript variant X1, mRNA	XM_054346885	7181	15	15	30	3	17	3578	3564	0
Urine EV replicated	tRF-17-8R6546J	17	Homo sapiens H3K27ac-H3K4me1 hESC enhancer GRCh37_chr8:145495633-145496276 (LOC127460803) on chromosome 8	NG_115572	844	15	15	30	3	17	331	345	0
Urine EV replicated	tRF-17-8R6546J	17	Homo sapiens H3K27ac hESC enhancer GRCh37_chr6:28806089-28807080 (LOC127405658) on chromosome 6	NG_107629	1192	15	15	30	1	15	247	233	0
Urine EV replicated	tRF-17-8R6546J	17	Homo sapiens CDK7 strongly-dependent group 2 enhancer GRCh37_chr6:28725125-28726324 (LOC126859634) on chromosome 6	NG_084135	1400	15	15	30	1	15	1131	1117	0
Urine EV replicated	tRF-17-8R6546J	17	PREDICTED: Homo sapiens uncharacterized LOC105378654 (LOC105378654), transcript variant X5, ncRNA	XR_007070088	4140	15	15	30	3	17	3840	3826	0
Urine EV replicated	tRF-17-8R6546J	17	PREDICTED: Homo sapiens uncharacterized LOC105378654 (LOC105378654), transcript variant X4, ncRNA	XR_007070087	2389	15	15	30	3	17	502	488	0
Urine EV replicated	tRF-17-8R6546J	17	PREDICTED: Homo sapiens uncharacterized LOC105378654 (LOC105378654), transcript variant X3, ncRNA	XR_007070086	8936	15	15	30	3	17	2489	2475	0
Urine EV replicated	tRF-17-8R6546J	17	PREDICTED: Homo sapiens uncharacterized LOC105378654 (LOC105378654), transcript variant X2, ncRNA	XR_007070085	3047	15	15	30	3	17	2747	2733	0
Urine EV replicated	tRF-17-8R6546J	17	PREDICTED: Homo sapiens uncharacterized LOC105378654 (LOC105378654), transcript variant X1, ncRNA	XR_007070084	3583	15	15	30	3	17	3283	3269	0
Urine EV replicated	tRF-17-8R6546J	17	PREDICTED: Homo sapiens plexin B1 (PLXNB1), transcript variant X16, mRNA	XM_047448336	9067	15	15	30	3	17	7510	7496	0
Urine EV replicated	tRF-17-8R6546J	17	PREDICTED: Homo sapiens plexin B1 (PLXNB1), transcript variant X15, misc_RNA	XR_007095694	10550	15	15	30	3	17	7510	7496	0
Urine EV replicated	tRF-17-8R6546J	17	PREDICTED: Homo sapiens plexin B1 (PLXNB1), transcript variant X14, mRNA	XM_047448335	7178	15	15	30	3	17	3578	3564	0
Urine EV replicated	tRF-17-8R6546J	17	PREDICTED: Homo sapiens plexin B1 (PLXNB1), transcript variant X13, mRNA	XM_047448334	7896	15	15	30	3	17	4296	4282	0
Urine EV replicated	tRF-17-8R6546J	17	PREDICTED: Homo sapiens plexin B1 (PLXNB1), transcript variant X12, mRNA	XM_047448333	7188	15	15	30	3	17	3588	3574	0
Urine EV replicated	tRF-17-8R6546J	17	PREDICTED: Homo sapiens plexin B1 (PLXNB1), transcript variant X11, mRNA	XM_047448332	7433	15	15	30	3	17	3833	3819	0
Urine EV replicated	tRF-17-8R6546J	17	PREDICTED: Homo sapiens plexin B1 (PLXNB1), transcript variant X10, mRNA	XM_047448331	7214	15	15	30	3	17	3614	3600	0
Urine EV replicated	tRF-17-8R6546J	17	PREDICTED: Homo sapiens plexin B1 (PLXNB1), transcript variant X9, mRNA	XM_017006631	11110	15	15	30	3	17	7510	7496	0
Urine EV replicated	tRF-17-8R6546J	17	PREDICTED: Homo sapiens plexin B1 (PLXNB1), transcript variant X7, mRNA	XM_011533836	7181	15	15	30	3	17	3578	3564	0
Urine EV replicated	tRF-17-8R6546J	17	PREDICTED: Homo sapiens plexin B1 (PLXNB1), transcript variant X6, mRNA	XM_011533835	7191	15	15	30	3	17	3588	3574	0
Urine EV replicated	tRF-17-8R6546J	17	PREDICTED: Homo sapiens plexin B1 (PLXNB1), transcript variant X5, mRNA	XM_047448330	7899	15	15	30	3	17	4296	4282	0
Urine EV replicated	tRF-17-8R6546J	17	PREDICTED: Homo sapiens plexin B1 (PLXNB1), transcript variant X4, mRNA	XM_024453600	11113	15	15	30	3	17	7510	7496	0
Urine EV replicated	tRF-17-8R6546J	17	PREDICTED: Homo sapiens plexin B1 (PLXNB1), transcript variant X3, mRNA	XM_017006630	7217	15	15	30	3	17	3614	3600	0
Urine EV replicated	tRF-17-8R6546J	17	PREDICTED: Homo sapiens plexin B1 (PLXNB1), transcript variant X2, mRNA	XM_011533834	7194	15	15	30	3	17	3591	3577	0
Urine EV replicated	tRF-17-8R6546J	17	PREDICTED: Homo sapiens plexin B1 (PLXNB1), transcript variant X1, mRNA	XM_011533833	7181	15	15	30	3	17	3578	3564	0
Urine EV replicated	tRF-17-8R6546J	17	PREDICTED: Homo sapiens uncharacterized LOC105378654 (LOC105378654), transcript variant X4, ncRNA	XR_002958294	2389	15	15	30	3	17	502	488	0
Urine EV replicated	tRF-17-8R6546J	17	PREDICTED: Homo sapiens uncharacterized LOC105378654 (LOC105378654), transcript variant X3, ncRNA	XR_001737987	8934	15	15	30	3	17	2489	2475	0
Urine EV replicated	tRF-17-8R6546J	17	PREDICTED: Homo sapiens uncharacterized LOC105378654 (LOC105378654), transcript variant X2, ncRNA	XR_007065894	3047	15	15	30	3	17	2747	2733	0
Urine EV replicated	tRF-17-8R6546J	17	Homo sapiens LHRI_LNC2374.1 lncRNA, complete sequence	MW803869	221	15	15	30	1	15	59	73	0
Urine EV replicated	tRF-17-8R6546J	17	TPA: Homo sapiens tRNA-Ala-TGC-6-1 gene	HG983589	72	15	15	30	1	15	58	72	0
Urine EV replicated	tRF-17-8R6546J	17	TPA: Homo sapiens tRNA-Ala-TGC-1-1 gene	HG983583	72	15	15	30	1	15	58	72	0
Urine EV replicated	tRF-17-8R6546J	17	TPA: Homo sapiens tRNA-Ala-AGC-3-1 gene	HG983551	72	15	15	30	1	15	58	72	0
Urine EV replicated	tRF-17-8R6546J	17	TPA: Mus musculus tRNA-Ala-AGC-3-1 gene >gi|634722654|tpe|HG984176.1| TPA: Mus musculus tRNA-Ala-AGC-3-2 gene >gi|634723411|tpe|HG984611.1| TPA: Rattus norvegicus tRNA-Ala-AGC-3-1 gene >gi|634723412|tpe|HG984612.1| TPA: Rattus norvegicus tRNA-Ala-AGC-3-2 gene >gi|634723415|tpe|HG984613.1| TPA: Rattus norvegicus tRNA-Ala-AGC-3-3 gene >gi|634726585|tpe|HG983549.1| TPA: Homo sapiens tRNA-Ala-AGC-2-1…	HG983549	72	15	15	30	1	15	58	72	0
Urine EV replicated	tRF-17-8R6546J	17	Homo sapiens chromosome 6 WGS contig WGS_TSI_AL390196.17_28400 genomic sequence	KF458132	331	15	15	30	1	15	143	157	0
Urine EV replicated	tRF-17-8R6546J	17	Homo sapiens FOSMID clone ABC27-1039P12 from chromosome 8, complete sequence	AC240812	38683	15	15	30	3	17	37196	37210	0
Urine EV replicated	tRF-17-8R6546J	17	Homo sapiens forkhead box L1 (FOXL1), RefSeqGene (LRG_709) on chromosome 16	NG_032995	10190	15	15	30	2	16	6797	6783	0
Urine EV replicated	tRF-17-8R6546J	17	Homo sapiens plexin B1 (PLXNB1), transcript variant 1, mRNA	NM_002673	7191	15	15	30	3	17	3591	3577	0
Urine EV replicated	tRF-17-8R6546J	17	Homo sapiens long intergenic non-protein coding RNA 1343 (LINC01343), long non-coding RNA	NR_038928	2303	15	15	30	3	17	209	223	0
Urine EV replicated	tRF-17-8R6546J	17	Homo sapiens transforming growth factor beta receptor 3 (TGFBR3), RefSeqGene on chromosome 1	NG_027757	232660	15	15	30	2	16	169607	169593	0
Urine EV replicated	tRF-17-8R6546J	17	Homo sapiens BAC clone RP11-735F20 from chromosome 8, complete sequence	AC233992	193775	15	15	30	3	17	34187	34201	0
Urine EV replicated	tRF-17-8R6546J	17	Homo sapiens FOSMID clone ABC11-49697300J6 from chromosome 8, complete sequence	AC231662	42759	15	15	30	3	17	36949	36963	0
Urine EV replicated	tRF-17-8R6546J	17	Homo sapiens plexin B1, mRNA (cDNA clone MGC:166894 IMAGE:9007264), complete cds	BC146793	7327	15	15	30	3	17	3711	3697	0
Urine EV replicated	tRF-17-8R6546J	17	Homo sapiens myeloid/lymphoid or mixed-lineage leukemia (trithorax homolog, Drosophila); translocated to, 10, mRNA (cDNA clone IMAGE:40124318), with apparent retained intron	BC129947	772	15	15	30	3	17	189	175	0
Urine EV replicated	tRF-17-8R6546J	17	Homo sapiens transforming growth factor, beta receptor III (betaglycan, 300kDa) (TGFBR3) gene, complete cds	AY796304	226174	15	15	30	2	16	165954	165940	0
Urine EV replicated	tRF-17-8R6546J	17	Homo sapiens chromosome 16 clone RP11-463O9, complete sequence	AC009108	168656	15	15	30	2	16	63531	63545	0
Urine EV replicated	tRF-17-8R6546J	17	Homo sapiens forkhead box L1, mRNA (cDNA clone MGC:111386 IMAGE:30920793), complete cds	BC100027	3204	15	15	30	2	16	1797	1783	0
Urine EV replicated	tRF-17-8R6546J	17	Human DNA sequence from clone DAAP-101P24 on chromosome 6, complete sequence	CR759954	94061	15	15	30	1	15	14639	14625	0
Urine EV replicated	tRF-17-8R6546J	17	Human DNA sequence from clone DAAP-101P24 on chromosome 6, complete sequence	CR759954	94061	15	15	30	1	15	63313	63299	0
Urine EV replicated	tRF-17-8R6546J	17	Human DNA sequence from clone DAAP-101P24 on chromosome 6, complete sequence	CR759954	94061	15	15	30	1	15	88553	88539	0
Urine EV replicated	tRF-17-8R6546J	17	Human DNA sequence from clone DAMC-338N21 on chromosome 6, complete sequence	CR936879	44479	15	15	30	1	15	18979	18965	0
Urine EV replicated	tRF-17-8R6546J	17	Human DNA sequence from clone DAMC-338N21 on chromosome 6, complete sequence	CR936879	44479	15	15	30	1	15	44216	44202	0
Urine EV replicated	tRF-17-8R6546J	17	Human DNA sequence from clone DADB-91F17 on chromosome 6, complete sequence	CR753651	124464	15	15	30	1	15	15976	15962	0
Urine EV replicated	tRF-17-8R6546J	17	Human DNA sequence from clone DADB-91F17 on chromosome 6, complete sequence	CR753651	124464	15	15	30	1	15	47371	47357	0
Urine EV replicated	tRF-17-8R6546J	17	Human DNA sequence from clone DADB-91F17 on chromosome 6, complete sequence	CR753651	124464	15	15	30	1	15	96054	96040	0
Urine EV replicated	tRF-17-8R6546J	17	Human DNA sequence from clone DADB-91F17 on chromosome 6, complete sequence	CR753651	124464	15	15	30	1	15	121295	121281	0
Urine EV replicated	tRF-17-8R6546J	17	Human DNA sequence from clone DASS-263B11 on chromosome 6, complete sequence	BX470194	43833	15	15	30	1	15	232	218	0
Urine EV replicated	tRF-17-8R6546J	17	Human DNA sequence from clone DASS-46L4 on chromosome 6, complete sequence	BX119924	92058	15	15	30	1	15	6992	6978	0
Urine EV replicated	tRF-17-8R6546J	17	Human DNA sequence from clone DASS-46L4 on chromosome 6, complete sequence	BX119924	92058	15	15	30	1	15	32230	32216	0
Urine EV replicated	tRF-17-8R6546J	17	Human DNA sequence from clone DASS-179P20 on chromosome 6, complete sequence	BX088523	87597	15	15	30	1	15	15805	15819	0
Urine EV replicated	tRF-17-8R6546J	17	Human DNA sequence from clone DASS-179P20 on chromosome 6, complete sequence	BX088523	87597	15	15	30	1	15	54435	54421	0
Urine EV replicated	tRF-17-8R6546J	17	Human DNA sequence from clone DASS-179P20 on chromosome 6, complete sequence	BX088523	87597	15	15	30	1	15	85829	85815	0
Urine EV replicated	tRF-17-8R6546J	17	Human DNA sequence from clone DAQB-239N17 on chromosome 6, complete sequence	AL844539	98145	15	15	30	1	15	14918	14904	0
Urine EV replicated	tRF-17-8R6546J	17	Human DNA sequence from clone DAQB-239N17 on chromosome 6, complete sequence	AL844539	98145	15	15	30	1	15	63582	63568	0
Urine EV replicated	tRF-17-8R6546J	17	Human DNA sequence from clone DAQB-239N17 on chromosome 6, complete sequence	AL844539	98145	15	15	30	1	15	88824	88810	0
Urine EV replicated	tRF-17-8R6546J	17	Human DNA sequence from clone RP11-7O11 on chromosome 1, complete sequence	AL357079	106769	15	15	30	1	15	66952	66938	0
Urine EV replicated	tRF-17-8R6546J	17	Human DNA sequence from clone CH502-419D21 on chromosome 6, complete sequence	AL901607	58752	15	15	30	1	15	10697	10683	0
Urine EV replicated	tRF-17-8R6546J	17	Homo sapiens chromosome 8, clone CTD-3232M19, complete sequence	AC110280	91099	15	15	30	3	17	63275	63289	0
Urine EV replicated	tRF-17-8R6546J	17	Human DNA sequence from clone RP11-214L19 on chromosome 1, complete sequence	AL390839	92253	15	15	30	3	17	73112	73098	0
Urine EV replicated	tRF-17-8R6546J	17	Homo sapiens chromosome 3 clone RP11-24C3, complete sequence	AC104448	155470	15	15	30	3	17	75766	75780	0
Urine EV replicated	tRF-17-8R6546J	17	Homo sapiens BAC clone RP11-417M17 from 4, complete sequence	AC109351	133157	15	15	30	3	17	64247	64261	0
Urine EV replicated	tRF-17-8R6546J	17	Homo sapiens chromosome 16 clone RP11-883G14, complete sequence	AC027688	177147	15	15	30	3	17	125764	125750	0
Urine EV replicated	tRF-17-8R6546J	17	Homo sapiens chromosome 16 clone RP11-1102H15, complete sequence	AC023819	136137	15	15	30	3	17	99793	99779	0
Urine EV replicated	tRF-17-D9W1X6K	17	Homo sapiens LNC_000188 lncRNA, complete sequence	MN308825	430	17	17	34	1	17	19	35	0
Urine EV replicated	tRF-17-D9W1X6K	17	Homo sapiens CRISPRi-validated cis-regulatory element chr6.1315 (LOC116183052) on chromosome 6	NG_066782	1273	17	17	34	1	17	728	712	0
Urine EV replicated	tRF-17-D9W1X6K	17	Homo sapiens VAC14 component of PIKFYVE complex (VAC14), RefSeqGene on chromosome 16	NG_054902	120731	17	17	34	1	17	16642	16626	0
Urine EV replicated	tRF-17-D9W1X6K	17	Homo sapiens VAC14 component of PIKFYVE complex (VAC14), RefSeqGene on chromosome 16	NG_054902	120731	17	17	34	1	17	27082	27098	0
Urine EV replicated	tRF-17-D9W1X6K	17	Homo sapiens VAC14 component of PIKFYVE complex (VAC14), RefSeqGene on chromosome 16	NG_054902	120731	17	17	34	1	17	27910	27926	0
Urine EV replicated	tRF-17-D9W1X6K	17	Homo sapiens VAC14 component of PIKFYVE complex (VAC14), RefSeqGene on chromosome 16	NG_054902	120731	15	15	30	1	15	17455	17441	0
Urine EV replicated	tRF-17-D9W1X6K	17	Homo sapiens Fc gamma receptor IIa (FCGR2A), RefSeqGene (LRG_1109) on chromosome 1	NG_012066	25599	17	17	34	1	17	23482	23466	0
Urine EV replicated	tRF-17-D9W1X6K	17	Homo sapiens chromosome 16 clone CH17-314D4, complete sequence	AC270552	237747	17	17	34	1	17	194329	194313	0
Urine EV replicated	tRF-17-D9W1X6K	17	Homo sapiens chromosome 16 clone CH17-314D4, complete sequence	AC270552	237747	17	17	34	1	17	204769	204785	0
Urine EV replicated	tRF-17-D9W1X6K	17	Homo sapiens chromosome 16 clone CH17-314D4, complete sequence	AC270552	237747	17	17	34	1	17	205597	205613	0
Urine EV replicated	tRF-17-D9W1X6K	17	Homo sapiens chromosome 16 clone CH17-314D4, complete sequence	AC270552	237747	15	15	30	1	15	195142	195128	0
Urine EV replicated	tRF-17-D9W1X6K	17	PREDICTED: Homo sapiens hes family bHLH transcription factor 7 (HES7), transcript variant X2, mRNA	XM_054317564	2811	17	17	34	1	17	859	843	0
Urine EV replicated	tRF-17-D9W1X6K	17	PREDICTED: Homo sapiens hes family bHLH transcription factor 7 (HES7), transcript variant X4, mRNA	XM_054317563	3274	17	17	34	1	17	266	250	0
Urine EV replicated	tRF-17-D9W1X6K	17	PREDICTED: Homo sapiens Fc gamma receptor IIa (FCGR2A), transcript variant X4, mRNA	XM_054335135	1516	17	17	34	1	17	1364	1348	0
Urine EV replicated	tRF-17-D9W1X6K	17	PREDICTED: Homo sapiens Fc gamma receptor IIa (FCGR2A), transcript variant X3, mRNA	XM_054335134	1713	17	17	34	1	17	1561	1545	0
Urine EV replicated	tRF-17-D9W1X6K	17	Homo sapiens H3K4me1 hESC enhancer GRCh37_chr17:8029079-8029880 (LOC127885694) on chromosome 17	NG_135431	1002	17	17	34	1	17	107	123	0
Urine EV replicated	tRF-17-D9W1X6K	17	Homo sapiens H3K27ac-H3K4me1 hESC enhancer GRCh37_chr1:161427797-161428409 (LOC127270671) on chromosome 1	NG_092523	813	17	17	34	1	17	223	239	0
Urine EV replicated	tRF-17-D9W1X6K	17	Homo sapiens H3K27ac-H3K4me1 hESC enhancer GRCh37_chr1:161420051-161420932 (LOC127270666) on chromosome 1	NG_092518	1082	17	17	34	1	17	538	554	0
Urine EV replicated	tRF-17-D9W1X6K	17	Homo sapiens OCT4-H3K27ac-H3K4me1 hESC enhancer GRCh37_chr1:161413009-161413866 (LOC127270661) on chromosome 1	NG_092513	1058	17	17	34	1	17	207	223	0
Urine EV replicated	tRF-17-D9W1X6K	17	Homo sapiens glycerol-3-phosphate dehydrogenase 2 (GPD2), RefSeqGene on chromosome 2; nuclear gene for mitochondrial product	NG_016606	193123	17	17	34	1	17	5917	5901	0
Urine EV replicated	tRF-17-D9W1X6K	17	PREDICTED: Homo sapiens hes family bHLH transcription factor 7 (HES7), transcript variant X2, mRNA	XM_047436941	2820	17	17	34	1	17	868	852	0
Urine EV replicated	tRF-17-D9W1X6K	17	PREDICTED: Homo sapiens Fc gamma receptor IIa (FCGR2A), transcript variant X4, mRNA	XM_017000665	1516	17	17	34	1	17	1364	1348	0
Urine EV replicated	tRF-17-D9W1X6K	17	PREDICTED: Homo sapiens Fc gamma receptor IIa (FCGR2A), transcript variant X3, mRNA	XM_017000664	1713	17	17	34	1	17	1561	1545	0
Urine EV replicated	tRF-17-D9W1X6K	17	Homo sapiens LHRI_LNC2269.1 lncRNA, complete sequence	MW804191	549	17	17	34	1	17	20	36	0
Urine EV replicated	tRF-17-D9W1X6K	17	Homo sapiens genomic DNA containing Trypanosoma cruzi kinetoplast minicircle DNA, family D patient 104, clone PA956	HG008547	570	17	17	34	1	17	362	346	0
Urine EV replicated	tRF-17-D9W1X6K	17	TPA: Homo sapiens tRNA-Gly-GCC-3-1 gene	HG983817	71	17	17	34	1	17	22	38	0
Urine EV replicated	tRF-17-D9W1X6K	17	TPA: Homo sapiens tRNA-Gly-GCC-2-1 gene >gi|634721943|tpe|HG983812.1| TPA: Homo sapiens tRNA-Gly-GCC-2-4 gene >gi|634721946|tpe|HG983813.1| TPA: Homo sapiens tRNA-Gly-GCC-2-5 gene >gi|634721947|tpe|HG983814.1| TPA: Homo sapiens tRNA-Gly-GCC-2-6 gene >gi|634721949|tpe|HG983815.1| TPA: Homo sapiens tRNA-Gly-GCC-2-2 gene >gi|634721951|tpe|HG983816.1| TPA: Homo sapiens tRNA-Gly-GCC-2-3 gene >gi|63472…	HG983811	71	17	17	34	1	17	22	38	0
Urine EV replicated	tRF-17-D9W1X6K	17	TPA: Homo sapiens tRNA-Gly-GCC-1-1 gene >gi|634721934|tpe|HG983807.1| TPA: Homo sapiens tRNA-Gly-GCC-1-2 gene >gi|634721936|tpe|HG983808.1| TPA: Homo sapiens tRNA-Gly-GCC-1-3 gene >gi|634721937|tpe|HG983809.1| TPA: Homo sapiens tRNA-Gly-GCC-1-4 gene >gi|634721940|tpe|HG983810.1| TPA: Homo sapiens tRNA-Gly-GCC-1-5 gene >gi|634722980|tpe|HG984369.1| TPA: Mus musculus tRNA-Gly-GCC-1-1 gene >gi|63472…	HG983806	71	17	17	34	1	17	22	38	0
Urine EV replicated	tRF-17-D9W1X6K	17	Homo sapiens isolate CHM13 chromosome 21	CP068257	45090682	17	17	34	1	17	15809936	15809920	0
Urine EV replicated	tRF-17-D9W1X6K	17	Homo sapiens isolate CHM13 chromosome 17	CP068261	84276897	17	17	34	1	17	8031142	8031158	0
Urine EV replicated	tRF-17-D9W1X6K	17	Homo sapiens isolate CHM13 chromosome 17	CP068261	84276897	16	16	29	1	17	19809538	19809554	0
Urine EV replicated	tRF-17-D9W1X6K	17	Homo sapiens isolate CHM13 chromosome 17	CP068261	84276897	14	14	28	3	16	73447910	73447923	0
Urine EV replicated	tRF-17-D9W1X6K	17	Homo sapiens isolate CHM13 chromosome 16	CP068262	96330374	17	17	34	1	17	76589432	76589416	0
Urine EV replicated	tRF-17-D9W1X6K	17	Homo sapiens isolate CHM13 chromosome 16	CP068262	96330374	17	17	34	1	17	76590260	76590244	0
Urine EV replicated	tRF-17-D9W1X6K	17	Homo sapiens isolate CHM13 chromosome 16	CP068262	96330374	17	17	34	1	17	76600700	76600716	0
Urine EV replicated	tRF-17-D9W1X6K	17	Homo sapiens isolate CHM13 chromosome 16	CP068262	96330374	15	15	30	1	15	76599887	76599901	0
Urine EV replicated	tRF-17-D9W1X6K	17	Homo sapiens BAC clone CH17-437O13 from chromosome 1, complete sequence	AC243971	241302	17	17	34	1	17	2	18	0
Urine EV replicated	tRF-17-D9W1X6K	17	Homo sapiens BAC clone CH17-437O13 from chromosome 1, complete sequence	AC243971	241302	17	17	34	1	17	58381	58365	0
Urine EV replicated	tRF-17-D9W1X6K	17	Homo sapiens BAC clone CH17-282E19 from chromosome 1, complete sequence	AC244471	204059	17	17	34	1	17	9300	9284	0
Urine EV replicated	tRF-17-D9W1X6K	17	Homo sapiens DNA, chromosome 21, nearly complete genome	AP023481	44550604	17	17	34	1	17	15260044	15260028	0
Urine EV replicated	tRF-17-D9W1X6K	17	Homo sapiens DNA, chromosome 17, nearly complete genome	AP023477	80688777	17	17	34	1	17	8208119	8208135	0
Urine EV replicated	tRF-17-D9W1X6K	17	Homo sapiens DNA, chromosome 17, nearly complete genome	AP023477	80688777	14	14	28	3	16	70042470	70042483	0
Urine EV replicated	tRF-17-D9W1X6K	17	Homo sapiens DNA, chromosome 16, nearly complete genome	AP023476	94690957	17	17	34	1	17	75181829	75181813	0
Urine EV replicated	tRF-17-D9W1X6K	17	Homo sapiens DNA, chromosome 16, nearly complete genome	AP023476	94690957	17	17	34	1	17	75182657	75182641	0
Urine EV replicated	tRF-17-D9W1X6K	17	Homo sapiens DNA, chromosome 16, nearly complete genome	AP023476	94690957	17	17	34	1	17	75193096	75193112	0
Urine EV replicated	tRF-17-D9W1X6K	17	Homo sapiens DNA, chromosome 16, nearly complete genome	AP023476	94690957	15	15	30	1	15	75192283	75192297	0
Urine EV replicated	tRF-17-D9W1X6K	17	Homo sapiens BAC clone CH17-135E1 from chromosome 1, complete sequence	AC243509	129689	17	17	34	1	17	2	18	0
Urine EV replicated	tRF-17-D9W1X6K	17	Homo sapiens BAC clone CH17-135E1 from chromosome 1, complete sequence	AC243509	129689	17	17	34	1	17	2632	2648	0
Urine EV replicated	tRF-17-D9W1X6K	17	Homo sapiens BAC clone CH17-135E1 from chromosome 1, complete sequence	AC243509	129689	17	17	34	1	17	10030	10046	0
Urine EV replicated	tRF-17-D9W1X6K	17	Homo sapiens BAC clone CH17-135E1 from chromosome 1, complete sequence	AC243509	129689	17	17	34	1	17	17424	17440	0
Urine EV replicated	tRF-17-D9W1X6K	17	Homo sapiens BAC clone CH17-135E1 from chromosome 1, complete sequence	AC243509	129689	17	17	34	1	17	75819	75803	0
Urine EV replicated	tRF-17-D9W1X6K	17	Homo sapiens BAC clone CH17-153G22 from chromosome 16, complete sequence	AC244605	230419	17	17	34	1	17	165709	165693	0
Urine EV replicated	tRF-17-D9W1X6K	17	Homo sapiens BAC clone CH17-153G22 from chromosome 16, complete sequence	AC244605	230419	17	17	34	1	17	176149	176165	0
Urine EV replicated	tRF-17-D9W1X6K	17	Homo sapiens BAC clone CH17-153G22 from chromosome 16, complete sequence	AC244605	230419	17	17	34	1	17	176977	176993	0
Urine EV replicated	tRF-17-D9W1X6K	17	Homo sapiens BAC clone CH17-153G22 from chromosome 16, complete sequence	AC244605	230419	15	15	30	1	15	166522	166508	0
Urine EV replicated	tRF-17-D9W1X6K	17	Homo sapiens BAC clone CH17-220A1 from chromosome 1, complete sequence	AC243546	112430	17	17	34	1	17	30740	30724	0
Urine EV replicated	tRF-17-D9W1X6K	17	Homo sapiens BAC clone CH17-220A1 from chromosome 1, complete sequence	AC243546	112430	17	17	34	1	17	35112	35096	0
Urine EV replicated	tRF-17-D9W1X6K	17	Homo sapiens BAC clone CH17-220A1 from chromosome 1, complete sequence	AC243546	112430	17	17	34	1	17	41776	41760	0
Urine EV replicated	tRF-17-D9W1X6K	17	Homo sapiens BAC clone CH17-220A1 from chromosome 1, complete sequence	AC243546	112430	17	17	34	1	17	50204	50188	0
Urine EV replicated	tRF-17-D9W1X6K	17	Homo sapiens BAC clone CH17-220A1 from chromosome 1, complete sequence	AC243546	112430	17	17	34	1	17	55942	55926	0
Urine EV replicated	tRF-17-D9W1X6K	17	Homo sapiens BAC clone CH17-220A1 from chromosome 1, complete sequence	AC243546	112430	17	17	34	1	17	64248	64232	0
Urine EV replicated	tRF-17-D9W1X6K	17	Homo sapiens BAC clone CH17-220A1 from chromosome 1, complete sequence	AC243546	112430	17	17	34	1	17	74818	74802	0
Urine EV replicated	tRF-17-D9W1X6K	17	Homo sapiens BAC clone CH17-220A1 from chromosome 1, complete sequence	AC243546	112430	17	17	34	1	17	88527	88511	0
Urine EV replicated	tRF-17-D9W1X6K	17	Homo sapiens BAC clone CH17-314D4 from chromosome 1, complete sequence	AC239822	238353	17	17	34	1	17	194849	194833	0
Urine EV replicated	tRF-17-D9W1X6K	17	Homo sapiens BAC clone CH17-314D4 from chromosome 1, complete sequence	AC239822	238353	17	17	34	1	17	205289	205305	0
Urine EV replicated	tRF-17-D9W1X6K	17	Homo sapiens BAC clone CH17-314D4 from chromosome 1, complete sequence	AC239822	238353	17	17	34	1	17	206117	206133	0
Urine EV replicated	tRF-17-D9W1X6K	17	Homo sapiens BAC clone CH17-314D4 from chromosome 1, complete sequence	AC239822	238353	15	15	30	1	15	195662	195648	0
Urine EV replicated	tRF-17-D9W1X6K	17	Homo sapiens FOSMID clone COR2A-DD0002RZJNU_O5 from chromosome 1, complete sequence	AC243811	33627	17	17	34	1	17	31239	31255	0
Urine EV replicated	tRF-17-D9W1X6K	17	Homo sapiens FOSMID clone ABC9-43348300F22 from chromosome 1, complete sequence	AC212909	36847	17	17	34	1	17	22093	22109	0
Urine EV replicated	tRF-17-D9W1X6K	17	Homo sapiens FOSMID clone ABC9-43348300F22 from chromosome 1, complete sequence	AC212909	36847	17	17	34	1	17	29489	29505	0
Urine EV replicated	tRF-17-D9W1X6K	17	Homo sapiens hes family bHLH transcription factor 7 (HES7), RefSeqGene on chromosome 17	NG_015816	10503	17	17	34	1	17	3326	3310	0
Urine EV replicated	tRF-17-D9W1X6K	17	Homo sapiens FOSMID clone ABC9-43843900G11 from chromosome 1, complete sequence	AC211967	39767	17	17	34	1	17	6688	6704	0
Urine EV replicated	tRF-17-D9W1X6K	17	Homo sapiens FOSMID clone ABC9-43843900G11 from chromosome 1, complete sequence	AC211967	39767	17	17	34	1	17	14098	14114	0
Urine EV replicated	tRF-17-D9W1X6K	17	Homo sapiens FOSMID clone ABC9-44043600G17 from chromosome 1, complete sequence	AC207076	40742	17	17	34	1	17	3627	3611	0
Urine EV replicated	tRF-17-D9W1X6K	17	Homo sapiens heat shock 70kDa protein 6 (HSP70B') (HSPA6) gene, complete cds	DQ521571	6467	17	17	34	1	17	1586	1570	0
Urine EV replicated	tRF-17-D9W1X6K	17	Homo sapiens chromosome 17, clone RP11-599B13, complete sequence	AC129492	196037	17	17	34	1	17	120643	120659	0
Urine EV replicated	tRF-17-D9W1X6K	17	Homo sapiens cDNA FLJ41405 fis, clone BRHIP2000621	AK123399	2266	17	17	34	1	17	1355	1371	0
Urine EV replicated	tRF-17-D9W1X6K	17	Human DNA sequence from clone RP11-5K23 on chromosome 1, complete sequence	AL590385	129505	17	17	34	1	17	2	18	0
Urine EV replicated	tRF-17-D9W1X6K	17	Human DNA sequence from clone RP11-5K23 on chromosome 1, complete sequence	AL590385	129505	17	17	34	1	17	7357	7373	0
Urine EV replicated	tRF-17-D9W1X6K	17	Human DNA sequence from clone RP11-5K23 on chromosome 1, complete sequence	AL590385	129505	17	17	34	1	17	14788	14804	0
Urine EV replicated	tRF-17-D9W1X6K	17	Human DNA sequence from clone RP11-5K23 on chromosome 1, complete sequence	AL590385	129505	17	17	34	1	17	22148	22164	0
Urine EV replicated	tRF-17-D9W1X6K	17	Human DNA sequence from clone RP11-5K23 on chromosome 1, complete sequence	AL590385	129505	17	17	34	1	17	80555	80539	0
Urine EV replicated	tRF-17-D9W1X6K	17	Homo sapiens chromosome 17, clone RP11-769H22, complete sequence	AC104762	162678	17	17	34	1	17	120642	120658	0
Urine EV replicated	tRF-17-D9W1X6K	17	Human DNA sequence from clone RP13-389K14 on chromosome 1, complete sequence	AL831711	8801	17	17	34	1	17	6803	6819	0
Urine EV replicated	tRF-17-D9W1X6K	17	Human DNA sequence from clone RP1-193B12 on chromosome 6p21.3-22.3, complete sequence	Z98744	100374	17	17	34	1	17	66698	66682	0
Urine EV replicated	tRF-17-D9W1X6K	17	Homo sapiens chromosome 16 clone RP11-424M24, complete sequence	AC027281	221210	17	17	34	1	17	5042	5026	0
Urine EV replicated	tRF-17-D9W1X6K	17	Homo sapiens chromosome 16 clone RP11-424M24, complete sequence	AC027281	221210	17	17	34	1	17	5870	5854	0
Urine EV replicated	tRF-17-D9W1X6K	17	Homo sapiens chromosome 16 clone RP11-424M24, complete sequence	AC027281	221210	17	17	34	1	17	16310	16326	0
Urine EV replicated	tRF-17-D9W1X6K	17	Homo sapiens chromosome 16 clone RP11-424M24, complete sequence	AC027281	221210	15	15	30	1	15	15497	15511	0
Urine EV replicated	tRF-17-D9W1X6K	17	Homo sapiens chromosome 17, clone RP13-348C17, complete sequence	AC130329	74378	17	17	34	1	17	57665	57649	0
Urine EV replicated	tRF-17-D9W1X6K	17	Homo sapiens BAC clone RP11-767C16 from 2, complete sequence	AC092686	117755	17	17	34	1	17	29610	29594	0
Urine EV replicated	tRF-17-D9W1X6K	17	Homo sapiens cDNA: FLJ21152 fis, clone CAS09594	AK024805	1745	17	17	34	1	17	21	37	0
Urine EV replicated	tRF-17-D9W1X6K	17	H.sapiens gene for tRNA-Gly >gi|51870476|emb|X53366.1| H.sapiens tRNA-Gly gene	Z26636	713	17	17	34	1	17	524	540	0
Urine EV replicated	tRF-17-D9W1X6K	17	Homo sapiens genomic DNA, chromosome 21q, section 14/105	AP001670	340000	17	17	34	1	17	84560	84544	0
Urine EV replicated	tRF-17-D9W1X6K	17	Homo sapiens genomic DNA, chromosome 21q21.1-q21.2 clone:B651M22, LL56-APP region, complete sequence	AP000952	109374	17	17	34	1	17	101792	101776	0
Urine EV replicated	tRF-17-D9W1X6K	17	Human Gly-tRNA gene, clone lambda-Ht8	M20924	397	17	17	34	1	17	221	237	0
Urine EV replicated	tRF-17-D9W1X6K	17	Human Gly-tRNA gene, clone lambda-Ht8	M20923	947	17	17	34	1	17	579	595	0
Urine EV replicated	tRF-17-D9W1X6K	17	Human Gly-tRNA-GCC gene and pseudogene, complete cds	M13661	1362	17	17	34	1	17	294	310	0
Urine EV replicated	tRF-17-D9W1X6K	17	Human Gly-tRNA-GCC gene and pseudogene, complete cds	M13661	1362	17	17	34	1	17	1123	1139	0
Urine EV replicated	tRF-17-D9W1X6K	17	Human Gly-tRNA-GCC >gi|175269|gb|M21527.1|MLMTRGA Moloney murine leukemia virus Gly-tRNA	K00208	74	17	17	34	1	17	22	38	0
Urine EV replicated	tRF-17-D9W1X6K	17	Homo sapiens isolate CHM13 chromosome 19	CP068259	61707364	16	16	32	1	16	8679015	8679000	0
Urine EV replicated	tRF-17-D9W1X6K	17	Homo sapiens DNA, chromosome 19, nearly complete genome	AP023479	59105444	16	16	32	1	16	8599355	8599340	0
Urine EV replicated	tRF-17-D9W1X6K	17	Homo sapiens BAC clone RP11-468O16 from chromosome 19, complete sequence	AC243312	170212	16	16	32	1	16	88574	88559	0
Urine EV replicated	tRF-17-D9W1X6K	17	Homo sapiens chromosome 19 clone XXfos-87852H4, complete sequence	AC144770	45852	16	16	32	1	16	478	493	0
Urine EV replicated	tRF-17-D9W1X6K	17	Homo sapiens chromosome 19 clone LLNLF-130H12, complete sequence	AC093230	46127	16	16	32	1	16	44502	44517	0
Urine EV replicated	tRF-17-D9W1X6K	17	Homo sapiens chromosome 19 clone LLNLR-239F4, complete sequence	AC092566	38046	16	16	32	1	16	33899	33884	0
Urine EV replicated	tRF-17-D9W1X6K	17	Homo sapiens chromosome 5 clone CTD-2123J17, complete sequence	AC020923	159973	16	16	32	1	16	10483	10498	0
Urine EV replicated	tRF-17-D9W1X6K	17	Homo sapiens chromosome 5 clone CTC-261N6, complete sequence	AC016550	88581	16	16	32	1	16	47986	47971	0
Urine EV replicated	tRF-17-D9W1X6K	17	Homo sapiens PBX homeobox 1 (PBX1), RefSeqGene on chromosome 1	NG_028246	333688	15	15	30	2	16	12717	12731	0
Urine EV replicated	tRF-17-D9W1X6K	17	TPA: Homo sapiens tRNA-Gly-GCC-5-1 gene	HG983819	71	15	15	30	1	15	22	36	0
Urine EV replicated	tRF-17-D9W1X6K	17	Human DNA sequence from clone RP11-217O12 on chromosome 9, complete sequence	AL512646	156476	15	15	30	1	15	8349	8363	0
Urine EV replicated	tRF-17-D9W1X6K	17	Human DNA sequence from clone RP11-503N16 on chromosome 1, complete sequence	AL359255	20809	15	15	30	2	16	15052	15066	0
Urine EV replicated	tRF-17-D9W1X6K	17	Human DNA sequence from clone RP11-321E11 on chromosome 13, complete sequence	AL445242	160177	15	15	30	1	15	89082	89068	0
Urine EV replicated	tRF-17-D9W1X6K	17	Homo sapiens genomic DNA, chromosome 8q23, clone: KB1517D11	AP003355	153728	15	15	30	2	16	24228	24242	0
Urine EV replicated	tRF-17-D9W1X6K	17	Homo sapiens chromosome 1 clone VMRC64-444H18, complete sequence	AC278531	149640	16	16	29	1	17	62875	62859	0
Urine EV replicated	tRF-17-D9W1X6K	17	Homo sapiens chromosome 1 clone VMRC66-476O21, complete sequence	AC278476	149723	16	16	29	1	17	126981	126997	0
Urine EV replicated	tRF-17-D9W1X6K	17	Homo sapiens chromosome 1 clone VMRC53-265H21, complete sequence	AC278387	174005	16	16	29	1	17	84312	84328	0
Urine EV replicated	tRF-17-D9W1X6K	17	Homo sapiens chromosome 1 clone VMRC53-233D07, complete sequence	AC278283	179468	16	16	29	1	17	35203	35187	0
Urine EV replicated	tRF-17-D9W1X6K	17	Homo sapiens chromosome 1 clone VMRC53-358D05, complete sequence	AC278279	169857	16	16	29	1	17	30413	30397	0
Urine EV replicated	tRF-17-D9W1X6K	17	homo sapiens BAC clone VMRC62-213D11 from chromosome 1, complete sequence	AC278042	158397	16	16	29	1	17	54473	54489	0
Urine EV replicated	tRF-17-D9W1X6K	17	homo sapiens BAC clone VMRC62-98C10 from chromosome 1, complete sequence	AC278039	174230	16	16	29	1	17	120172	120156	0
Urine EV replicated	tRF-17-D9W1X6K	17	homo sapiens BAC clone VMRC62-128E22 from chromosome 1, complete sequence	AC278038	143088	16	16	29	1	17	33502	33486	0
Urine EV replicated	tRF-17-D9W1X6K	17	homo sapiens BAC clone VMRC62-431P24 from chromosome 1, complete sequence	AC278037	166498	16	16	29	1	17	80776	80760	0
Urine EV replicated	tRF-17-D9W1X6K	17	Homo sapiens chromosome 1 clone CH17-303O5, complete sequence	AC277963	200744	16	16	29	1	17	32890	32874	0
Urine EV replicated	tRF-17-D9W1X6K	17	Homo sapiens chromosome 1 clone CH17-323C16, complete sequence	AC277959	220234	16	16	29	1	17	104242	104258	0
Urine EV replicated	tRF-17-D9W1X6K	17	Homo sapiens chromosome 1 clone CH17-318M17, complete sequence	AC277841	212649	16	16	29	1	17	72711	72727	0
Urine EV replicated	tRF-17-D9W1X6K	17	homo sapiens BAC clone VMRC64-330J4 from chromosome 1, complete sequence	AC275667	158923	16	16	29	1	17	116239	116223	0
Urine EV replicated	tRF-17-D9W1X6K	17	Homo sapiens BAC clone VMRC59-306M21 from chromosome unknown, complete sequence	AC275617	124579	16	16	29	1	17	52294	52310	0
Urine EV replicated	tRF-17-D9W1X6K	17	Homo sapiens BAC clone VMRC59-184G11 from chromosome unknown, complete sequence	AC275594	161627	16	16	29	1	17	123341	123357	0
Urine EV replicated	tRF-17-D9W1X6K	17	Homo sapiens BAC clone VMRC66-254P16 from chromosome unknown, complete sequence	AC275586	155870	16	16	29	1	17	112168	112152	0
Urine EV replicated	tRF-17-D9W1X6K	17	Homo sapiens BAC clone VMRC64-212E14 from chromosome unknown, complete sequence	AC275540	139852	16	16	29	1	17	65673	65657	0
Urine EV replicated	tRF-17-D9W1X6K	17	Homo sapiens BAC clone VMRC64-490L10 from chromosome unknown, complete sequence	AC275502	177243	16	16	29	1	17	136423	136439	0
Urine EV replicated	tRF-17-D9W1X6K	17	Homo sapiens BAC clone VMRC64-196C3 from chromosome unknown, complete sequence	AC275499	167459	16	16	29	1	17	146220	146236	0
Urine EV replicated	tRF-17-D9W1X6K	17	Homo sapiens BAC clone VMRC66-358D18 from chromosome unknown, complete sequence	AC275487	158385	16	16	29	1	17	44439	44455	0
Urine EV replicated	tRF-17-D9W1X6K	17	Homo sapiens BAC clone VMRC64-269B9 from chromosome unknown, complete sequence	AC275452	105478	16	16	29	1	17	6268	6252	0
Urine EV replicated	tRF-17-D9W1X6K	17	Homo sapiens chromosome 1 clone CH17-7N6, complete sequence	AC270713	204781	16	16	29	1	17	199429	199413	0
Urine EV replicated	tRF-17-D9W1X6K	17	Homo sapiens chromosome 1 clone CH17-440O11, complete sequence	AC270700	200283	16	16	29	1	17	149762	149778	0
Urine EV replicated	tRF-17-D9W1X6K	17	Homo sapiens chromosome 1 clone CH17-404D11, complete sequence	AC270613	214292	16	16	29	1	17	150957	150941	0
Urine EV replicated	tRF-17-D9W1X6K	17	Homo sapiens chromosome 1 clone CH17-39N7, complete sequence	AC270581	218682	16	16	29	1	17	99938	99922	0
Urine EV replicated	tRF-17-D9W1X6K	17	Homo sapiens chromosome 1 clone CH17-160P16, complete sequence	AC270486	205216	16	16	29	1	17	27003	26987	0
Urine EV replicated	tRF-17-D9W1X6K	17	Homo sapiens H3K27ac-H3K4me1 hESC enhancer GRCh37_chr1:17053781-17054392 (LOC127267714) on chromosome 1	NG_089575	812	16	16	29	1	17	121	137	0
Urine EV replicated	tRF-17-D9W1X6K	17	Homo sapiens chromosome unknown clone VMRC59-306M21, complete sequence	AC279601	124599	16	16	29	1	17	52317	52333	0
Urine EV replicated	tRF-17-I7XUK8N	17	Homo sapiens NANOG-H3K27ac-H3K4me1 hESC enhancer GRCh37_chr2:70475342-70476156 (LOC127273609) on chromosome 2	NG_095460	1015	17	17	34	1	17	917	901	0
Urine EV replicated	tRF-17-I7XUK8N	17	TPA: Homo sapiens tRNA-Gly-CCC-2-2 gene >gi|634721920|tpe|HG983799.1| TPA: Homo sapiens tRNA-Gly-CCC-2-1 gene >gi|634722966|tpe|HG984362.1| TPA: Mus musculus tRNA-Gly-CCC-1-1 gene >gi|634722968|tpe|HG984363.1| TPA: Mus musculus tRNA-Gly-CCC-1-2 gene >gi|634723758|tpe|HG984792.1| TPA: Rattus norvegicus tRNA-Gly-CCC-2-1 gene >gi|634723759|tpe|HG984793.1| TPA: Rattus norvegicus tRNA-Gly-CCC-2-2 gene	HG983798	71	17	17	34	1	17	36	52	0
Urine EV replicated	tRF-17-I7XUK8N	17	Homo sapiens isolate CHM13 chromosome 16	CP068262	96330374	17	17	34	1	17	640838	640822	0
Urine EV replicated	tRF-17-I7XUK8N	17	Chain E, tRNA(Gly)	5E6M_E	74	17	17	34	1	17	36	52	0
Urine EV replicated	tRF-17-I7XUK8N	17	Chain C, tRNA(Gly)	5E6M_C	74	17	17	34	1	17	36	52	0
Urine EV replicated	tRF-17-I7XUK8N	17	Chain C, tRNA-Gly-CCC-2-2	4QEI_C	69	17	17	34	1	17	36	52	0
Urine EV replicated	tRF-17-I7XUK8N	17	Chain C, Gly-tRNA-CCC >gi|636666299|pdb|4KR3|C Chain C, Gly-tRNA-CCC	4KR2_C	74	17	17	34	1	17	36	52	0
Urine EV replicated	tRF-17-I7XUK8N	17	Homo sapiens DNA, chromosome 16, nearly complete genome	AP023476	94690957	17	17	34	1	17	627238	627222	0
Urine EV replicated	tRF-17-I7XUK8N	17	Homo sapiens TIA1 cytotoxic granule associated RNA binding protein (TIA1), RefSeqGene on chromosome 2	NG_029967	46204	17	17	34	1	17	4622	4638	0
Urine EV replicated	tRF-17-I7XUK8N	17	Human DNA sequence from clone LA16c-349E10 on chromosome 16, complete sequence	AL022341	20539	17	17	34	1	17	518	502	0
Urine EV replicated	tRF-17-I7XUK8N	17	Homo sapiens 16p13.3 sequence section 3 of 8	AE006464	256073	17	17	34	1	17	109007	108991	0
Urine EV replicated	tRF-17-I7XUK8N	17	cytotoxic granule-associated RNA-binding protein p40-TIA-1 {5' region} [human, leukocytes, Genomic, 1019 nt]	S70114	1019	17	17	34	1	17	394	410	0
Urine EV replicated	tRF-17-I7XUK8N	17	Homo sapiens BAC clone RP11-175A7 from 2, complete sequence	AC016700	177995	17	17	34	1	17	165373	165357	0
Urine EV replicated	tRF-17-I7XUK8N	17	Human Gly-tRNA-CCC	K00209	74	17	17	34	1	17	36	52	0
Urine EV replicated	tRF-17-I7XUK8N	17	Homo sapiens CDK7 strongly-dependent group 2 enhancer GRCh37_chr14:34965742-34966941 (LOC126861915) on chromosome 14	NG_086413	1459	15	15	30	2	16	780	766	0
Urine EV replicated	tRF-17-I7XUK8N	17	Human chromosome 14 DNA sequence BAC R-671J11 of library RPCI-11 from chromosome 14 of Homo sapiens (Human), complete sequence	AL445363	181987	15	15	30	2	16	69002	68988	0
Urine EV replicated	tRF-17-I7XUK8N	17	Homo sapiens unc-93 homolog B1, TLR signaling regulator (UNC93B1), mRNA	NM_030930	2294	14	14	28	2	15	2141	2154	0
Urine EV replicated	tRF-17-I7XUK8N	17	Homo sapiens unc-93 homolog B2 (pseudogene) (UNC93B2) on chromosome 7	NG_013106	4993	14	14	28	2	15	4739	4752	0
Urine EV replicated	tRF-17-I7XUK8N	17	Homo sapiens unc-93 homolog B5 (pseudogene) (UNC93B5) on chromosome 11	NG_028989	4954	14	14	28	2	15	4701	4714	0
Urine EV replicated	tRF-17-I7XUK8N	17	Homo sapiens unc-93 homolog B7 (pseudogene) (UNC93B7) on chromosome 4	NG_032765	4979	14	14	28	2	15	4725	4738	0
Urine EV replicated	tRF-17-I7XUK8N	17	PREDICTED: Homo sapiens unc-93 homolog B1, TLR signaling regulator (UNC93B1), transcript variant X2, mRNA	XM_054370081	1830	14	14	28	2	15	1677	1690	0
Urine EV replicated	tRF-17-I7XUK8N	17	PREDICTED: Homo sapiens unc-93 homolog B1, TLR signaling regulator (UNC93B1), transcript variant X1, mRNA	XM_054370080	1932	14	14	28	2	15	1779	1792	0
Urine EV replicated	tRF-17-I7XUK8N	17	Homo sapiens H3K4me1 hESC enhancer GRCh37_chr11:71318422-71319036 (LOC127821966) on chromosome 11	NG_123410	815	14	14	28	2	15	615	628	0
Urine EV replicated	tRF-17-I7XUK8N	17	Homo sapiens H3K4me1 hESC enhancer GRCh37_chr11:67758703-67759308 (LOC127821674) on chromosome 11	NG_123119	806	14	14	28	2	15	122	109	0
Urine EV replicated	tRF-17-I7XUK8N	17	Homo sapiens H3K4me1 hESC enhancer GRCh37_chr11:67478197-67478780 (LOC127821653) on chromosome 11	NG_123102	784	14	14	28	2	15	781	768	0
Urine EV replicated	tRF-17-I7XUK8N	17	Homo sapiens H3K4me1 hESC enhancer GRCh37_chr4:4144249-4144862 (LOC127399984) on chromosome 4	NG_101948	814	14	14	28	2	15	742	729	0
Urine EV replicated	tRF-17-I7XUK8N	17	PREDICTED: Homo sapiens unc-93 homolog B1, TLR signaling regulator (UNC93B1), transcript variant X1, mRNA	XM_011545290	1932	14	14	28	2	15	1779	1792	0
Urine EV replicated	tRF-17-I7XUK8N	17	Homo sapiens unc-93 homolog B6 (pseudogene) (UNC93B6) on chromosome 11	NG_009705	4985	14	14	28	2	15	4731	4744	0
Urine EV replicated	tRF-17-I7XUK8N	17	PREDICTED: Homo sapiens unc-93 homolog B1, TLR signaling regulator (UNC93B1), transcript variant X2, mRNA	XM_011545291	1830	14	14	28	2	15	1677	1690	0
Urine EV replicated	tRF-17-I7XUK8N	17	Homo sapiens isolate CHM13 chromosome 22	CP068256	51324926	14	14	28	2	15	47291890	47291903	0
Urine EV replicated	tRF-17-I7XUK8N	17	Homo sapiens DNA, chromosome 22, nearly complete genome	AP023482	46684173	14	14	28	2	15	42656191	42656204	0
Urine EV replicated	tRF-17-I7XUK8N	17	Homo sapiens chromosome unknown clone VMRC59-386H18, complete sequence	AC279651	186122	14	14	28	2	15	13470	13457	0
Urine EV replicated	tRF-17-I7XUK8N	17	Homo sapiens chromosome unknown clone VMRC59-396P01, complete sequence	AC279516	111009	14	14	28	2	15	51712	51699	0
Urine EV replicated	tRF-17-I7XUK8N	17	Homo sapiens FOSMID clone ABC16-2369A3 from chromosome 11, complete sequence	AC239891	39008	14	14	28	2	15	30942	30929	0
Urine EV replicated	tRF-17-I7XUK8N	17	Homo sapiens FOSMID clone ABC12-7919949J8 from chromosome unknown, complete sequence	AC236395	40397	14	14	28	2	15	37162	37175	0
Urine EV replicated	tRF-17-I7XUK8N	17	Homo sapiens FOSMID clone ABC8-40884700F19 from chromosome unknown, complete sequence	AC234630	39045	14	14	28	2	15	28540	28527	0
Urine EV replicated	tRF-17-I7XUK8N	17	Homo sapiens unc-93 homolog B1, TLR signaling regulator (UNC93B1), RefSeqGene (LRG_123) on chromosome 11	NG_007581	20020	14	14	28	2	15	17871	17884	0
Urine EV replicated	tRF-17-I7XUK8N	17	Homo sapiens BAC clone RP11-740N7 from 7, complete sequence	AC079804	184512	14	14	28	2	15	11039	11026	0
Urine EV replicated	tRF-17-I7XUK8N	17	Homo sapiens unc-93 homolog B1 (C. elegans), mRNA (cDNA clone MGC:104592 IMAGE:30348121), complete cds	BC092472	2299	14	14	28	2	15	2137	2150	0
Urine EV replicated	tRF-17-I7XUK8N	17	Homo sapiens chromosome 11, clone RP11-138N3, complete sequence	AC034259	206192	14	14	28	2	15	93769	93782	0
Urine EV replicated	tRF-17-I7XUK8N	17	Homo sapiens BAC clone RP11-264E23 from 4, complete sequence	AC097493	163639	14	14	28	2	15	44164	44177	0
Urine EV replicated	tRF-17-I7XUK8N	17	Homo sapiens BAC clone RP11-324I10 from 4, complete sequence	AC011744	191596	14	14	28	2	15	20418	20405	0
Urine EV replicated	tRF-17-I7XUK8N	17	Homo sapiens BAC clone RP11-747H12 from 4, complete sequence	AC073648	180659	14	14	28	2	15	138276	138263	0
Urine EV replicated	tRF-17-I7XUK8N	17	Human DNA sequence from clone CTA-29F11 on chromosome 22, complete sequence	AL118516	89319	14	14	28	2	15	84579	84592	0
Urine EV replicated	tRF-17-I7XUK8N	17	Homo sapiens BAC clone RP11-1396O13 from 4, complete sequence	AC116655	246224	14	14	28	2	15	70864	70851	0
Urine EV replicated	tRF-17-I7XUK8N	17	Homo sapiens clone CDABP0025 mRNA sequence	AY007125	2128	14	14	28	2	15	1956	1969	0
Urine EV replicated	tRF-17-I7XUK8N	17	Homo sapiens PAC clone RP5-901A4 from 11, complete sequence	AC004923	94851	14	14	28	2	15	38946	38959	0
Urine EV replicated	tRF-17-I7XUK8N	17	Homo sapiens genomic DNA, chromosome 11 clone:RP11-684B2, complete sequences	AP000867	199999	14	14	28	2	15	135787	135800	0
Urine EV replicated	tRF-17-I7XUK8N	17	Homo sapiens genomic DNA, chromosome 11q clone:RP11-655M14, complete sequences	AP003385	174074	14	14	28	2	15	109800	109787	0
Urine EV replicated	tRF-17-I7XUK8N	17	Homo sapiens genomic sequence surrounding NotI site, clone NR1-TL5R	AJ337691	639	14	14	28	2	15	572	585	0
Urine EV replicated	tRF-17-I7XUK8N	17	Homo sapiens genomic sequence surrounding NotI site, clone NB6-809R	AJ336885	662	14	14	28	2	15	570	583	0
Urine EV replicated	tRF-17-I7XUK8N	17	Homo sapiens genomic sequence surrounding NotI site, clone NR1-SI1R	AJ329828	692	14	14	28	2	15	566	579	0
Urine EV replicated	tRF-17-I7XUK8N	17	Homo sapiens mRNA for unc-93 related protein (UNC93 gene)	AJ271326	2282	14	14	28	2	15	2128	2141	0
Urine EV replicated	tRF-18-HR1PF7D2	18	Homo sapiens kazrin, periplakin interacting protein (KAZN), RefSeqGene on chromosome 1	NG_029844	1231658	16	16	32	3	18	927983	927968	0
Urine EV replicated	tRF-18-HR1PF7D2	18	Homo sapiens otogelin (OTOG), RefSeqGene on chromosome 11	NG_033191	105572	16	16	32	3	18	53204	53189	0
Urine EV replicated	tRF-18-HR1PF7D2	18	PREDICTED: Homo sapiens uncharacterized LOC105369878 (LOC105369878), transcript variant X2, ncRNA >gi|1034677947|ref|XR_001756956.1| PREDICTED: Homo sapiens uncharacterized LOC105369878 (LOC105369878), transcript variant X2, ncRNA >gi|2217474662|ref|XR_007082900.1| PREDICTED: Homo sapiens uncharacterized LOC105369878 (LOC105369878), transcript variant X2, ncRNA	XR_945158	989	16	16	32	3	18	162	177	0
Urine EV replicated	tRF-18-HR1PF7D2	18	Homo sapiens katanin interacting protein (KATNIP), RefSeqGene on chromosome 16	NG_046731	237201	16	16	32	3	18	149033	149048	0
Urine EV replicated	tRF-18-HR1PF7D2	18	Homo sapiens isolate CHM13 chromosome 16	CP068262	96330374	16	16	32	3	18	27972952	27972967	0
Urine EV replicated	tRF-18-HR1PF7D2	18	Homo sapiens isolate CHM13 chromosome 16	CP068262	96330374	14	14	28	4	17	4680885	4680872	0
Urine EV replicated	tRF-18-HR1PF7D2	18	Homo sapiens isolate CHM13 chromosome 16	CP068262	96330374	14	14	28	5	18	7556255	7556242	0
Urine EV replicated	tRF-18-HR1PF7D2	18	Homo sapiens isolate CHM13 chromosome 16	CP068262	96330374	14	14	28	2	15	54855694	54855707	0
Urine EV replicated	tRF-18-HR1PF7D2	18	Homo sapiens DNA, chromosome 16, nearly complete genome	AP023476	94690957	16	16	32	3	18	26569902	26569917	0
Urine EV replicated	tRF-18-HR1PF7D2	18	Homo sapiens DNA, chromosome 16, nearly complete genome	AP023476	94690957	14	14	28	4	17	4691961	4691948	0
Urine EV replicated	tRF-18-HR1PF7D2	18	Homo sapiens DNA, chromosome 16, nearly complete genome	AP023476	94690957	14	14	28	5	18	7598324	7598311	0
Urine EV replicated	tRF-18-HR1PF7D2	18	Homo sapiens DNA, chromosome 16, nearly complete genome	AP023476	94690957	14	14	28	2	15	53454395	53454408	0
Urine EV replicated	tRF-18-HR1PF7D2	18	Human DNA sequence from clone CH507-3H24 on chromosome 21, complete sequence	CU638729	146914	16	16	32	3	18	131922	131907	0
Urine EV replicated	tRF-18-HR1PF7D2	18	Homo sapiens chromosome X clone RP11-403L9 map p11.4, complete sequence	AC108880	218413	16	16	32	3	18	148385	148370	0
Urine EV replicated	tRF-18-HR1PF7D2	18	Homo sapiens, clone RP11-257B4, complete sequence	AC100764	70384	16	16	32	3	18	38602	38587	0
Urine EV replicated	tRF-18-HR1PF7D2	18	Homo sapiens 12q BAC RP11-324H9 (Roswell Park Cancer Institute Human BAC Library) complete sequence	AC079597	156766	16	16	32	3	18	28904	28919	0
Urine EV replicated	tRF-18-HR1PF7D2	18	Homo sapiens chromosome 11, clone RP6-106F23, complete sequence	AC124799	161065	16	16	32	3	18	106452	106437	0
Urine EV replicated	tRF-18-HR1PF7D2	18	Homo sapiens chromosome 5 clone RP11-265O6, complete sequence	AC108110	136730	16	16	32	3	18	43879	43864	0
Urine EV replicated	tRF-18-HR1PF7D2	18	Human DNA sequence from clone RP11-753C18 on chromosome 10, complete sequence	AL358790	131753	16	16	32	3	18	77031	77016	0
Urine EV replicated	tRF-18-HR1PF7D2	18	Human DNA sequence from clone RP11-570J20 on chromosome 9q33.1-34.12, complete sequence	AL158052	221887	16	16	32	3	18	116630	116645	0
Urine EV replicated	tRF-18-HR1PF7D2	18	Human DNA sequence from clone RP5-864I18 on chromosome 1p36.11-36.33, complete sequence	AL031293	106018	16	16	32	3	18	49376	49391	0
Urine EV replicated	tRF-18-HR1PF7D2	18	Homo sapiens chromosome 16 clone RP11-551E2, complete sequence	AC009144	173758	16	16	32	3	18	61065	61050	0
Urine EV replicated	tRF-18-HR1PF7D2	18	Homo sapiens chromosome 16 clone CTD-2049O4, complete sequence	AC016597	129338	16	16	32	3	18	64731	64716	0
Urine EV replicated	tRF-18-HR1PF7D2	18	Human Chromosome 11p14.3 PAC clone 6-106f23, complete sequence	AC005137	161190	16	16	32	3	18	106581	106566	0
Urine EV replicated	tRF-18-HR1PF7D2	18	Homo sapiens isolate heart-7 endogenous virus endogenous human herpesvirus 6 sequence	MT508944	157965	15	15	30	4	18	128268	128254	0
Urine EV replicated	tRF-18-HR1PF7D2	18	Homo sapiens isolate heart-5 endogenous virus endogenous human herpesvirus 6 sequence	MT508942	159059	15	15	30	4	18	127852	127838	0
Urine EV replicated	tRF-18-HR1PF7D2	18	Homo sapiens isolate heart-32 endogenous virus endogenous human herpesvirus 6 sequence	MT508937	160186	15	15	30	4	18	128556	128542	0
Urine EV replicated	tRF-18-HR1PF7D2	18	Homo sapiens isolate heart-30 endogenous virus endogenous human herpesvirus 6 sequence	MT508935	158790	15	15	30	4	18	128509	128495	0
Urine EV replicated	tRF-18-HR1PF7D2	18	Homo sapiens isolate heart-29 endogenous virus endogenous human herpesvirus 6 sequence	MT508933	158095	15	15	30	4	18	128154	128140	0
Urine EV replicated	tRF-18-HR1PF7D2	18	Homo sapiens isolate heart-28 endogenous virus endogenous human herpesvirus 6 sequence	MT508932	158405	15	15	30	4	18	128047	128033	0
Urine EV replicated	tRF-18-HR1PF7D2	18	Homo sapiens isolate heart-27 endogenous virus endogenous human herpesvirus 6 sequence	MT508931	158664	15	15	30	4	18	128308	128294	0
Urine EV replicated	tRF-18-HR1PF7D2	18	Homo sapiens isolate heart-21 endogenous virus endogenous human herpesvirus 6 sequence	MT508925	158680	15	15	30	4	18	128000	127986	0
Urine EV replicated	tRF-18-HR1PF7D2	18	Homo sapiens isolate heart-20 endogenous virus endogenous human herpesvirus 6 sequence	MT508924	159269	15	15	30	4	18	128219	128205	0
Urine EV replicated	tRF-18-HR1PF7D2	18	Homo sapiens isolate heart-1 endogenous virus endogenous human herpesvirus 6 sequence	MT508923	158949	15	15	30	4	18	128360	128346	0
Urine EV replicated	tRF-18-HR1PF7D2	18	Homo sapiens isolate heart-17 endogenous virus endogenous human herpesvirus 6 sequence	MT508920	157676	15	15	30	4	18	127764	127750	0
Urine EV replicated	tRF-18-HR1PF7D2	18	Homo sapiens isolate heart-15 endogenous virus endogenous human herpesvirus 6 sequence	MT508918	158764	15	15	30	4	18	128215	128201	0
Urine EV replicated	tRF-18-HR1PF7D2	18	Homo sapiens FRAS1 related extracellular matrix 3 (FREM3), RefSeqGene on chromosome 4	NG_052820	130374	15	15	30	3	17	102652	102638	0
Urine EV replicated	tRF-18-HR1PF7D2	18	Homo sapiens endogenous virus human herpesvirus 6A sequence	KT895199	158757	15	15	30	4	18	127771	127757	0
Urine EV replicated	tRF-18-HR1PF7D2	18	TPA: Homo sapiens tRNA-Thr-TGT-1-1 gene	HG984058	74	15	15	30	1	15	60	74	0
Urine EV replicated	tRF-18-HR1PF7D2	18	Homo sapiens forkhead box P1 (FOXP1), RefSeqGene on chromosome 3	NG_028243	635405	15	15	30	3	17	316014	316000	0
Urine EV replicated	tRF-18-HR1PF7D2	18	Homo sapiens 12 BAC RP11-239E14 (Roswell Park Cancer Institute Human BAC Library) complete sequence	AC117403	121632	15	15	30	1	15	94175	94189	0
Urine EV replicated	tRF-18-HR1PF7D2	18	Homo sapiens chromosome 3 clone RP11-905F6, complete sequence	AC104442	219227	15	15	30	3	17	65810	65824	0
Urine EV replicated	tRF-18-HR1PF7D2	18	Homo sapiens BAC clone RP11-495I15 from 4, complete sequence	AC092659	160529	15	15	30	1	15	36993	36979	0
Urine EV replicated	tRF-18-HR1PF7D2	18	Human DNA sequence from clone RP11-155I19 on chromosome X, complete sequence	AL390966	160942	15	15	30	1	15	109672	109686	0
Urine EV replicated	tRF-18-HR1PF7D2	18	Human DNA sequence from clone RP11-69I8 on chromosome 6, complete sequence	AL354866	61349	15	15	30	2	16	19263	19277	0
Urine EV replicated	tRF-18-HR1PF7D2	18	Human DNA sequence from clone RP4-655C4 on chromosome 1p32.3-34.3, complete sequence	AL080286	155278	15	15	30	1	15	108392	108406	0
Urine EV replicated	tRF-18-HR1PF7D2	18	Homo sapiens BAC clone RP11-481K16 from 4, complete sequence	AC139713	196020	15	15	30	3	17	62036	62050	0
Urine EV replicated	tRF-18-HR1PF7D2	18	Homo sapiens chromosome 3 clone RP11-298C2, complete sequence	AC138058	154123	15	15	30	3	17	140410	140424	0
Urine EV replicated	tRF-18-HR1PF7D2	18	Homo sapiens BAC clone RP11-27G13 from 4, complete sequence	AC097467	178204	15	15	30	4	18	46558	46572	0
Urine EV replicated	tRF-18-HR1PF7D2	18	Homo sapiens PAC clone RP11-569I24 from 7, complete sequence	AC005678	187543	15	15	30	1	15	138257	138243	0
Urine EV replicated	tRF-18-HR1PF7D2	18	Human DNA sequence from clone RP1-29K1 on chromosome 6p21.3-22.2, complete sequence	Z98745	128779	15	15	30	1	15	93226	93212	0
Urine EV replicated	tRF-18-HR1PF7D2	18	Homo sapiens calcium/calmodulin dependent protein kinase II gamma (CAMK2G), RefSeqGene on chromosome 10	NG_029408	69091	16	16	29	1	17	38988	39004	0
Urine EV replicated	tRF-18-HR1PF7D2	18	Homo sapiens dynein axonemal heavy chain 14 (DNAH14), RefSeqGene on chromosome 1	NG_053088	477873	16	16	29	2	18	37779	37795	0
Urine EV replicated	tRF-18-HR1PF7D2	18	Homo sapiens archain 1 (ARCN1), RefSeqGene on chromosome 11	NG_051953	37647	16	16	29	1	17	11183	11167	0
Urine EV replicated	tRF-18-HR1PF7D2	18	Homo sapiens methyl-CpG binding domain protein 5 (MBD5), RefSeqGene on chromosome 2	NG_017003	503045	16	16	29	1	17	501616	501632	0
Urine EV replicated	tRF-18-HR1PF7D2	18	Homo sapiens spectrin beta, non-erythrocytic 4 (SPTBN4), RefSeqGene on chromosome 19	NG_029905	116464	16	16	29	2	18	32056	32040	0
Urine EV replicated	tRF-18-HR1PF7D2	18	PREDICTED: Homo sapiens ADAMTS like 1 (ADAMTSL1), transcript variant X15, mRNA	XM_047424079	4946	16	16	29	2	18	4364	4348	0
Urine EV replicated	tRF-18-HR1PF7D2	18	PREDICTED: Homo sapiens ADAMTS like 1 (ADAMTSL1), transcript variant X14, mRNA	XM_047424078	4997	16	16	29	2	18	4415	4399	0
Urine EV replicated	tRF-18-HR1PF7D2	18	PREDICTED: Homo sapiens ADAMTS like 1 (ADAMTSL1), transcript variant X13, mRNA	XM_047424077	5180	16	16	29	2	18	4598	4582	0
Urine EV replicated	tRF-18-HR1PF7D2	18	PREDICTED: Homo sapiens ADAMTS like 1 (ADAMTSL1), transcript variant X12, mRNA	XM_017015314	5231	16	16	29	2	18	4649	4633	0
Urine EV replicated	tRF-18-HR1PF7D2	18	Homo sapiens isolate NA24385 chromosome Y	CP086569	62460029	16	16	29	2	18	6035284	6035268	0
Urine EV replicated	tRF-18-HR1PF7D2	18	Homo sapiens isolate NA24385 chromosome Y	CP086569	62460029	16	16	29	2	18	8273142	8273158	0
Urine EV replicated	tRF-18-HR1PF7D2	18	Homo sapiens isolate CHM13 chromosome 19	CP068259	61707364	16	16	29	2	18	43314700	43314684	0
Urine EV replicated	tRF-18-HR1PF7D2	18	Homo sapiens DNA, chromosome Y, nearly complete genome	AP023484	50294361	16	16	29	2	18	3234895	3234879	0
Urine EV replicated	tRF-18-HR1PF7D2	18	Homo sapiens DNA, chromosome Y, nearly complete genome	AP023484	50294361	16	16	29	2	18	5524690	5524706	0
Urine EV replicated	tRF-18-HR1PF7D2	18	Homo sapiens DNA, chromosome 19, nearly complete genome	AP023479	59105444	16	16	29	2	18	40655125	40655109	0
Urine EV replicated	tRF-18-HR1PF7D2	18	Homo sapiens FOSMID clone ABC13-910122L2 from chromosome unknown, complete sequence	AC231769	38337	16	16	29	1	17	8387	8371	0
Urine EV replicated	tRF-18-HR1PF7D2	18	Homo sapiens coatomer subunit delta (ARCN1) gene, complete cds, alternatively spliced	EF444951	36532	16	16	29	1	17	9174	9158	0
Urine EV replicated	tRF-18-HR1PF7D2	18	Homo sapiens chromosome 19 clone CTD-2223D2, complete sequence	AC020929	119569	16	16	29	2	18	30530	30514	0
Urine EV replicated	tRF-18-HR1PF7D2	18	Homo sapiens chromosome 10 clone RP11-574K11, complete sequence	AC022400	183797	16	16	29	1	17	173315	173299	0
Urine EV replicated	tRF-18-HR1PF7D2	18	Homo sapiens chromosome 1 clone RP11-398H19, complete sequence	AC093560	199594	16	16	29	2	18	154341	154357	0
Urine EV replicated	tRF-18-HR1PF7D2	18	Homo sapiens chromosome 1 clone RP11-59A2, complete sequence	AC096674	176747	16	16	29	1	17	102729	102745	0
Urine EV replicated	tRF-18-HR1PF7D2	18	Homo sapiens chromosome 1 clone RP11-86H7, complete sequence	AC093117	200426	16	16	29	2	18	78920	78936	0
Urine EV replicated	tRF-18-HR1PF7D2	18	Human DNA sequence from clone RP11-220B22 on chromosome 9, complete sequence	AL158150	168011	16	16	29	2	18	55926	55910	0
Urine EV replicated	tRF-18-HR1PF7D2	18	Human DNA sequence from clone RP5-824O18 on chromosome 1p11.2-13.1, complete sequence	AL138758	108205	16	16	29	2	18	100059	100075	0
Urine EV replicated	tRF-18-HR1PF7D2	18	Homo sapiens BAC clone RP11-375H16 from 2, complete sequence	AC016731	120082	16	16	29	1	17	16905	16889	0
Urine EV replicated	tRF-18-HR1PF7D2	18	Homo sapiens 12 BAC RP11-937I21 (Roswell Park Cancer Institute Human BAC Library) complete sequence	AC011701	205510	16	16	29	2	18	37698	37714	0
Urine EV replicated	tRF-18-HR1PF7D2	18	Homo sapiens BAC clone RP11-375P13 from Y, complete sequence	AC064829	89684	16	16	29	2	18	596	612	0
Urine EV replicated	tRF-18-HR1PF7D2	18	Homo sapiens BAC clone RP11-182H20 from Y, complete sequence	AC017019	162379	16	16	29	2	18	156426	156442	0
Urine EV replicated	tRF-18-HR1PF7D2	18	Homo sapiens genomic DNA, chromosome 11 clone:RP11-861M13, complete sequence	AP000941	199321	16	16	29	1	17	53799	53783	0
Urine EV replicated	tRF-18-HR1PF7D2	18	Homo sapiens BAC clone RP11-492C2 from Y, complete sequence	AC006335	222512	16	16	29	2	18	131307	131291	0
Urine EV replicated	tRF-18-HR1PF7D2	18	Human Cosmid g5129s420 from 7q31.3, complete sequence	AC003975	41025	16	16	29	2	18	8189	8173	0
Urine EV replicated	tRF-18-HR1PF7D2	18	Human pLK mRNA, complete cds	U01038	2190	16	16	29	1	17	36	20	0
Urine EV replicated	tRF-18-HR1PF7D2	18	Homo sapiens AT-rich interaction domain 1B (ARID1B), RefSeqGene on chromosome 6	NG_066624	441754	14	14	28	2	15	422591	422578	0
Urine EV replicated	tRF-18-HR1PF7D2	18	Homo sapiens chromosome 15 clone VMRC59-199D19, complete sequence	AC279009	167963	14	14	28	3	16	119201	119188	0
Urine EV replicated	tRF-18-HR1PF7D2	18	Homo sapiens RNA binding fox-1 homolog 1 (RBFOX1), RefSeqGene on chromosome 16	NG_011881	2480592	14	14	28	5	18	2289927	2289914	0
Urine EV replicated	tRF-18-HR1PF7D2	18	Homo sapiens chromosome 3 clone CH17-75H23, complete sequence	AC277892	219445	14	14	28	3	16	131027	131014	0
Urine EV replicated	tRF-18-HR1PF7D2	18	Homo sapiens BAC clone CH17-352E6 from chromosome unknown, complete sequence	AC275611	212907	14	14	28	5	18	182596	182609	0
Urine EV replicated	tRF-18-HR1PF7D2	18	Homo sapiens BAC clone CH17-352E6 from chromosome unknown, complete sequence	AC275611	212907	14	14	28	5	18	198270	198257	0
Urine EV replicated	tRF-18-HR1PF7D2	18	Homo sapiens NANOG-H3K4me1 hESC enhancer GRCh37_chr17:59429722-59430668 (LOC127887520) on chromosome 17	NG_137163	1147	14	14	28	4	17	213	200	0
Urine EV replicated	tRF-18-HR1PF7D2	18	Homo sapiens H3K27ac hESC enhancer GRCh37_chr3:184243589-184244391 (LOC127399308) on chromosome 3	NG_101274	1003	14	14	28	2	15	298	311	0
Urine EV replicated	tRF-18-HR1PF7D2	18	Homo sapiens H3K4me1 hESC enhancer GRCh37_chr3:47446437-47446936 (LOC127397342) on chromosome 3	NG_099311	700	14	14	28	3	16	447	434	0
Urine EV replicated	tRF-18-HR1PF7D2	18	Homo sapiens PHD finger protein 3 (PHF3), RefSeqGene on chromosome 6	NG_034034	97210	14	14	28	5	18	4479	4466	0
Urine EV replicated	tRF-18-HR1PF7D2	18	Homo sapiens leucine rich glioma inactivated 1 (LGI1), RefSeqGene on chromosome 10	NG_011832	47224	14	14	28	3	16	11164	11151	0
Urine EV replicated	tRF-18-HR1PF7D2	18	PREDICTED: Homo sapiens uncharacterized LOC124906019 (LOC124906019), transcript variant X2, ncRNA	XR_007072181	39440	14	14	28	5	18	22381	22368	0
Urine EV replicated	tRF-18-HR1PF7D2	18	PREDICTED: Homo sapiens tRNA methyltransferase 11 homolog (TRMT11), transcript variant X26, misc_RNA	XR_007059314	61271	14	14	28	5	18	18888	18875	0
Urine EV replicated	tRF-18-HR1PF7D2	18	PREDICTED: Homo sapiens tRNA methyltransferase 11 homolog (TRMT11), transcript variant X9, misc_RNA	XR_007059297	45614	14	14	28	5	18	3184	3171	0
Urine EV replicated	tRF-18-HR1PF7D2	18	PREDICTED: Homo sapiens solute carrier family 10 member 7 (SLC10A7), transcript variant X7, mRNA	XM_017008689	3676	14	14	28	5	18	982	969	0
Urine EV replicated	tRF-18-HR1PF7D2	18	PREDICTED: Homo sapiens uncharacterized LOC124906019 (LOC124906019), transcript variant X1, ncRNA	XR_007086799	31282	14	14	28	5	18	22380	22367	0
Urine EV replicated	tRF-18-HR1PF7D2	18	Homo sapiens clone ABC9_3_5_000043972400_M8 chromosome 22 sequence, complete sequence	OL310205	40443	14	14	28	5	18	7005	6992	0
Urine EV replicated	tRF-18-HR1PF7D2	18	Homo sapiens DNA, sequence_id: unplaced_0111	AP023596	81716	14	14	28	5	18	77520	77507	0
Urine EV replicated	tRF-18-HR1PF7D2	18	Homo sapiens DNA, sequence_id: unplaced_0037	AP023522	160935	14	14	28	4	17	116345	116332	0
Urine EV replicated	tRF-18-HR1PF7D2	18	Homo sapiens DNA, chromosome 22, nearly complete genome	AP023482	46684173	14	14	28	5	18	17615296	17615283	0
Urine EV replicated	tRF-18-HR1PF7D2	18	Homo sapiens DNA, chromosome 20, nearly complete genome	AP023480	62398354	14	14	28	5	18	1077377	1077390	0
Urine EV replicated	tRF-18-HR1PF7D2	18	Homo sapiens DNA, chromosome 20, nearly complete genome	AP023480	62398354	14	14	28	2	15	51821090	51821077	0
Urine EV replicated	tRF-18-HR1PF7D2	18	Homo sapiens DNA, chromosome 20, nearly complete genome	AP023480	62398354	14	14	28	5	18	55282044	55282031	0
Urine EV replicated	tRF-18-HR1PF7D2	18	Homo sapiens DNA, chromosome 17, nearly complete genome	AP023477	80688777	14	14	28	4	17	58802590	58802577	0
Urine EV replicated	tRF-18-HR1PF7D2	18	Homo sapiens DNA, chromosome 17, nearly complete genome	AP023477	80688777	14	14	28	1	14	80449099	80449086	0
Urine EV replicated	tRF-18-HR1PF7D2	18	Homo sapiens DNA, chromosome 15, nearly complete genome	AP023475	95537968	14	14	28	3	16	26625845	26625858	0
Urine EV replicated	tRF-18-HR1PF7D2	18	Homo sapiens chromosome unknown clone VMRC59-325O14, complete sequence	AC279635	169717	14	14	28	5	18	24506	24493	0
Urine EV replicated	tRF-18-MBQ4NKDJ	18	Homo sapiens LHRI_LNC718.1 lncRNA gene, complete sequence	MN296879	240	18	18	36	1	18	7	24	0
Urine EV replicated	tRF-18-MBQ4NKDJ	18	Homo sapiens CRISPRi-validated cis-regulatory element chr6.1315 (LOC116183052) on chromosome 6	NG_066782	1273	18	18	36	1	18	320	303	0
Urine EV replicated	tRF-18-MBQ4NKDJ	18	Homo sapiens LHRI_LNC2170.1 lncRNA, complete sequence	MW804146	508	18	18	36	1	18	14	31	0
Urine EV replicated	tRF-18-MBQ4NKDJ	18	Homo sapiens LHRI_LNC2366.1 lncRNA, complete sequence	MW803861	203	18	18	36	1	18	16	33	0
Urine EV replicated	tRF-18-MBQ4NKDJ	18	Homo sapiens Sharpr-MPRA regulatory region 6095 (LOC123620075) on chromosome 6	NG_077957	495	18	18	36	1	18	388	371	0
Urine EV replicated	tRF-18-MBQ4NKDJ	18	TPA: Homo sapiens tRNA-iMet-CAT-2-1 gene	HG984144	72	18	18	36	1	18	16	33	0
Urine EV replicated	tRF-18-MBQ4NKDJ	18	TPA: Homo sapiens tRNA-iMet-CAT-1-1 gene >gi|634722582|tpe|HG984137.1| TPA: Homo sapiens tRNA-iMet-CAT-1-8 gene >gi|634722583|tpe|HG984138.1| TPA: Homo sapiens tRNA-iMet-CAT-1-2 gene >gi|634722585|tpe|HG984139.1| TPA: Homo sapiens tRNA-iMet-CAT-1-3 gene >gi|634722586|tpe|HG984140.1| TPA: Homo sapiens tRNA-iMet-CAT-1-4 gene >gi|634722588|tpe|HG984141.1| TPA: Homo sapiens tRNA-iMet-CAT-1-5 gene >gi…	HG984136	72	18	18	36	1	18	16	33	0
Urine EV replicated	tRF-18-MBQ4NKDJ	18	TPA: Homo sapiens tRNA-Thr-CGT-6-1 gene	HG984057	72	18	18	36	1	18	16	33	0
Urine EV replicated	tRF-18-MBQ4NKDJ	18	Homo sapiens isolate CHM13 chromosome 17	CP068261	84276897	18	18	36	1	18	83363700	83363683	0
Urine EV replicated	tRF-18-MBQ4NKDJ	18	Homo sapiens isolate CHM13 chromosome 17	CP068261	84276897	16	16	29	2	18	84090497	84090513	0
Urine EV replicated	tRF-18-MBQ4NKDJ	18	Homo sapiens isolate CHM13 chromosome 17	CP068261	84276897	14	14	28	4	17	67834074	67834087	0
Urine EV replicated	tRF-18-MBQ4NKDJ	18	Chain j, initiator Met-RNA-i >gi|2231579900|pdb|7TQL|3 Chain 3, Human Met-tRNAiMet	4KZZ_j	75	18	18	36	1	18	16	33	0
Urine EV replicated	tRF-18-MBQ4NKDJ	18	Chain 1, tRNA >gi|1938876689|pdb|7A09|f Chain f, tRNA	6ZP4_1	75	18	18	36	1	18	16	33	0
Urine EV replicated	tRF-18-MBQ4NKDJ	18	Homo sapiens DNA, chromosome 17, nearly complete genome	AP023477	80688777	18	18	36	1	18	79951672	79951655	0
Urine EV replicated	tRF-18-MBQ4NKDJ	18	Homo sapiens DNA, chromosome 17, nearly complete genome	AP023477	80688777	14	14	28	4	17	64434135	64434148	0
Urine EV replicated	tRF-18-MBQ4NKDJ	18	Homo sapiens piRNA piR-35176, complete sequence	DQ597110	32	18	18	36	1	18	15	32	0
Urine EV replicated	tRF-18-MBQ4NKDJ	18	Homo sapiens piRNA piR-33437, complete sequence	DQ593325	28	18	18	36	1	18	1	18	0
Urine EV replicated	tRF-18-MBQ4NKDJ	18	Homo sapiens piRNA piR-32374, complete sequence	DQ582262	31	18	18	36	1	18	14	31	0
Urine EV replicated	tRF-18-MBQ4NKDJ	18	Homo sapiens piRNA piR-30961, complete sequence	DQ570849	31	18	18	36	1	18	13	30	0
Urine EV replicated	tRF-18-MBQ4NKDJ	18	Human DNA sequence from clone RP11-354A16 on chromosome 1, complete sequence	AL713889	54184	18	18	36	1	18	7877	7894	0
Urine EV replicated	tRF-18-MBQ4NKDJ	18	Human DNA sequence from clone RP1-193B12 on chromosome 6p21.3-22.3, complete sequence	Z98744	100374	18	18	36	1	18	66290	66273	0
Urine EV replicated	tRF-18-MBQ4NKDJ	18	Human DNA sequence from clone RP1-45P21 on chromosome 6p21.3-22.2, complete sequence	AL021917	170001	18	18	36	1	18	2722	2739	0
Urine EV replicated	tRF-18-MBQ4NKDJ	18	Human DNA sequence from clone RP1-45P21 on chromosome 6p21.3-22.2, complete sequence	AL021917	170001	18	18	36	1	18	29361	29344	0
Urine EV replicated	tRF-18-MBQ4NKDJ	18	Human DNA sequence from clone RP1-45P21 on chromosome 6p21.3-22.2, complete sequence	AL021917	170001	18	18	36	1	18	46538	46521	0
Urine EV replicated	tRF-18-MBQ4NKDJ	18	Human DNA sequence from clone SCb-24o18 on chromosome 6p21.31-22.2, complete sequence	AL021808	154066	18	18	36	1	18	89073	89056	0
Urine EV replicated	tRF-18-MBQ4NKDJ	18	Human DNA sequence from clone SCb-24o18 on chromosome 6p21.31-22.2, complete sequence	AL021808	154066	18	18	36	1	18	118269	118252	0
Urine EV replicated	tRF-18-MBQ4NKDJ	18	Human DNA sequence from clone RP1-97D16 on chromosome 6p21.3-22.2, complete sequence	AL009179	139904	18	18	36	1	18	106052	106069	0
Urine EV replicated	tRF-18-MBQ4NKDJ	18	Human DNA sequence from clone SCb-34I8 on chromosome 6p21.3-22.1, complete sequence	AL021918	159506	18	18	36	1	18	141785	141768	0
Urine EV replicated	tRF-18-MBQ4NKDJ	18	Homo sapiens chromosome 17, clone RP13-991F5, complete sequence	AC124287	162180	18	18	36	1	18	117354	117337	0
Urine EV replicated	tRF-18-MBQ4NKDJ	18	H.sapiens tRNA-Met gene	Z69292	825	18	18	36	1	18	332	349	0
Urine EV replicated	tRF-18-MBQ4NKDJ	18	Human initiator Met-tRNA mutant T54	M10957	141	18	18	36	1	18	46	63	0
Urine EV replicated	tRF-18-MBQ4NKDJ	18	Human met-tRNA-i gene 2 (clone lambda-htm2)	J00311	270	18	18	36	1	18	139	156	0
Urine EV replicated	tRF-18-MBQ4NKDJ	18	Human Met-tRNA-i gene 1	J00310	270	18	18	36	1	18	139	156	0
Urine EV replicated	tRF-18-MBQ4NKDJ	18	Human initiator Met-tRNA-i >gi|175421|gb|K00329.1|MUSTRMI Mouse initiator Met-tRNA-i >gi|175569|gb|K00327.1|ONHTRMI Salmon initiator Met-tRNA-i >gi|176348|gb|K00330.1|XELTRMI X.laevis initiator Met-tRNA-i >gi|1048348538|pdb|5K0Y|N Chain N, tRNA >gi|1890516849|pdb|6FEC|N Chain N, Transfer RNA (75-MER) >gi|1938947666|pdb|6YBV|w Chain w, Initiator methionine tRNA >gi|1938954186|pdb|6ZMW|w Chain w, I…	K00328	75	18	18	36	1	18	16	33	0
Urine EV replicated	tRF-18-MBQ4NKDJ	18	Homo sapiens piRNA piR-35952, complete sequence	DQ597886	32	17	17	34	1	17	16	32	0
Urine EV replicated	tRF-18-MBQ4NKDJ	18	Homo sapiens piRNA piR-35229, complete sequence	DQ597163	29	17	17	34	1	17	13	29	0
Urine EV replicated	tRF-18-MBQ4NKDJ	18	Homo sapiens piRNA piR-33387, complete sequence	DQ593275	32	17	17	34	1	17	16	32	0
Urine EV replicated	tRF-18-MBQ4NKDJ	18	Chain C, E-tRNA	3J3D_C	75	16	16	32	3	18	18	33	0
Urine EV replicated	tRF-18-MBQ4NKDJ	18	Homo sapiens fibroblast growth factor 18 (FGF18), RefSeqGene on chromosome 5	NG_029158	44964	16	16	32	3	18	13254	13239	0
Urine EV replicated	tRF-18-MBQ4NKDJ	18	Homo sapiens chromosome 5 clone RP11-117L6, complete sequence	AC093246	175154	16	16	32	3	18	67156	67171	0
Urine EV replicated	tRF-18-MBQ4NKDJ	18	Human DNA sequence from clone RP11-360D14 on chromosome 6, complete sequence	AL592426	107647	16	16	32	2	17	44551	44536	0
Urine EV replicated	tRF-18-MBQ4NKDJ	18	Homo sapiens genomic DNA, chromosome 11 clone:RP11-410I24, complete sequence	AP003050	152715	16	16	32	2	17	30701	30716	0
Urine EV replicated	tRF-18-MBQ4NKDJ	18	Homo sapiens isolate CHM13 chromosome 22	CP068256	51324926	17	17	31	1	18	43331058	43331075	0
Urine EV replicated	tRF-18-MBQ4NKDJ	18	Homo sapiens isolate CHM13 chromosome 22	CP068256	51324926	16	16	29	1	17	18950701	18950717	0
Urine EV replicated	tRF-18-MBQ4NKDJ	18	Homo sapiens isolate CHM13 chromosome 22	CP068256	51324926	16	16	29	1	17	21100809	21100793	0
Urine EV replicated	tRF-18-MBQ4NKDJ	18	Homo sapiens isolate CHM13 chromosome 22	CP068256	51324926	16	16	29	1	17	21534346	21534362	0
Urine EV replicated	tRF-18-MBQ4NKDJ	18	Homo sapiens isolate CHM13 chromosome 22	CP068256	51324926	16	16	29	1	17	23064721	23064737	0
Urine EV replicated	tRF-18-MBQ4NKDJ	18	Homo sapiens isolate CHM13 chromosome 22	CP068256	51324926	16	16	29	1	17	24715677	24715661	0
Urine EV replicated	tRF-18-MBQ4NKDJ	18	Homo sapiens isolate CHM13 chromosome 22	CP068256	51324926	16	16	29	1	17	25118152	25118168	0
Urine EV replicated	tRF-18-MBQ4NKDJ	18	Homo sapiens DNA, chromosome 22, nearly complete genome	AP023482	46684173	17	17	31	1	18	38627143	38627160	0
Urine EV replicated	tRF-18-MBQ4NKDJ	18	Homo sapiens DNA, chromosome 22, nearly complete genome	AP023482	46684173	16	16	29	1	17	16665377	16665361	0
Urine EV replicated	tRF-18-MBQ4NKDJ	18	Homo sapiens DNA, chromosome 22, nearly complete genome	AP023482	46684173	16	16	29	1	17	18308495	18308511	0
Urine EV replicated	tRF-18-MBQ4NKDJ	18	Homo sapiens DNA, chromosome 22, nearly complete genome	AP023482	46684173	16	16	29	1	17	19970676	19970660	0
Urine EV replicated	tRF-18-MBQ4NKDJ	18	Homo sapiens DNA, chromosome 22, nearly complete genome	AP023482	46684173	16	16	29	1	17	20391433	20391449	0
Urine EV replicated	tRF-18-MBQ4NKDJ	18	Human DNA sequence from clone RP4-794L19 on chromosome 1, complete sequence	AL357045	141277	17	17	31	1	18	25988	25971	0
Urine EV replicated	tRF-18-MBQ4NKDJ	18	Human DNA sequence from clone RP3-437M21 on chromosome 22q13.2-13.33, complete sequence	AL049758	87402	17	17	31	1	18	47044	47061	0
Urine EV replicated	tRF-18-MBQ4NKDJ	18	Homo sapiens chromosome 16 clone CH17-225P23, complete sequence	AC277949	211301	15	15	30	2	16	31186	31172	0
Urine EV replicated	tRF-18-MBQ4NKDJ	18	Homo sapiens H3K27ac-H3K4me1 hESC enhancer GRCh37_chr16:2743320-2744137 (LOC127882822) on chromosome 16	NG_132788	1018	15	15	30	2	16	471	457	0
Urine EV replicated	tRF-18-MBQ4NKDJ	18	Homo sapiens MED14-independent group 3 enhancer GRCh37_chr8:145926819-145928018 (LOC126860551) on chromosome 8	NG_085051	1400	15	15	30	1	15	48	62	0
Urine EV replicated	tRF-18-MBQ4NKDJ	18	Homo sapiens isolate CHM13 chromosome 20	CP068258	66210255	15	15	30	2	16	65623815	65623801	0
Urine EV replicated	tRF-18-MBQ4NKDJ	18	Homo sapiens isolate CHM13 chromosome 20	CP068258	66210255	16	16	29	2	18	18411986	18412002	0
Urine EV replicated	tRF-18-MBQ4NKDJ	18	Homo sapiens isolate CHM13 chromosome 20	CP068258	66210255	16	16	29	1	17	24052554	24052538	0
Urine EV replicated	tRF-18-MBQ4NKDJ	18	Homo sapiens isolate CHM13 chromosome 20	CP068258	66210255	14	14	28	5	18	63767195	63767182	0
Urine EV replicated	tRF-18-MBQ4NKDJ	18	Homo sapiens isolate CHM13 chromosome 16	CP068262	96330374	15	15	30	2	16	2713904	2713890	0
Urine EV replicated	tRF-18-MBQ4NKDJ	18	Homo sapiens DNA, chromosome 20, nearly complete genome	AP023480	62398354	15	15	30	2	16	61913852	61913838	0
Urine EV replicated	tRF-18-MBQ4NKDJ	18	Homo sapiens DNA, chromosome 20, nearly complete genome	AP023480	62398354	16	16	29	2	18	18302868	18302884	0
Urine EV replicated	tRF-18-MBQ4NKDJ	18	Homo sapiens DNA, chromosome 20, nearly complete genome	AP023480	62398354	16	16	29	1	17	23937125	23937109	0
Urine EV replicated	tRF-18-MBQ4NKDJ	18	Homo sapiens DNA, chromosome 20, nearly complete genome	AP023480	62398354	14	14	28	5	18	60058861	60058848	0
Urine EV replicated	tRF-18-MBQ4NKDJ	18	Homo sapiens DNA, chromosome 16, nearly complete genome	AP023476	94690957	15	15	30	2	16	2727450	2727436	0
Urine EV replicated	tRF-18-MBQ4NKDJ	18	Homo sapiens chromosome 8 multiple clones map q24.3, complete sequence	AF235103	345524	15	15	30	1	15	4345	4359	0
Urine EV replicated	tRF-18-MBQ4NKDJ	18	Homo sapiens BAC clone RP11-718M20 from 4, complete sequence	AC147876	119938	15	15	30	4	18	18551	18537	0
Urine EV replicated	tRF-18-MBQ4NKDJ	18	Homo sapiens chromosome 16 clone CTD-2270P14, complete sequence	AC092117	211606	15	15	30	2	16	84760	84746	0
Urine EV replicated	tRF-18-MBQ4NKDJ	18	Homo sapiens chromosome 8 clone XX-P7B3, RP4-698E23 map qtel, complete sequence	AF186192	145247	15	15	30	1	15	88867	88881	0
Urine EV replicated	tRF-18-MBQ4NKDJ	18	Human DNA sequence from clone RP4-583P15 on chromosome 20, complete sequence	AL121845	120917	15	15	30	2	16	107646	107632	0
Urine EV replicated	tRF-18-MBQ4NKDJ	18	Homo sapiens chromosome 16 clone CTD-2593F12, complete sequence	AC093517	160606	15	15	30	2	16	78180	78166	0
Urine EV replicated	tRF-18-MBQ4NKDJ	18	Homo sapiens genomic sequence surrounding NotI site, clone NR5-HG5C	AJ327634	653	15	15	30	1	15	455	469	0
Urine EV replicated	tRF-18-MBQ4NKDJ	18	Homo sapiens platelet activating factor receptor (PTAFR), transcript variant 2, mRNA	NM_001164722	4029	16	16	29	2	18	3798	3782	0
Urine EV replicated	tRF-18-MBQ4NKDJ	18	Homo sapiens platelet activating factor receptor (PTAFR), transcript variant 4, mRNA	NM_001164723	4064	16	16	29	2	18	3833	3817	0
Urine EV replicated	tRF-18-MBQ4NKDJ	18	Homo sapiens platelet activating factor receptor (PTAFR), transcript variant 3, mRNA	NM_000952	3993	16	16	29	2	18	3762	3746	0
Urine EV replicated	tRF-18-MBQ4NKDJ	18	Homo sapiens chromosome 22 clone CH17-334E21, complete sequence	AC277972	217465	16	16	29	1	17	82135	82151	0
Urine EV replicated	tRF-18-MBQ4NKDJ	18	Homo sapiens chromosome 22 clone CH17-50J9, complete sequence	AC277850	229172	16	16	29	1	17	46790	46806	0
Urine EV replicated	tRF-18-MBQ4NKDJ	18	Homo sapiens chromosome 22 clone CH17-369L23, complete sequence	AC277836	225459	16	16	29	1	17	117118	117102	0
Urine EV replicated	tRF-18-MBQ4NKDJ	18	Homo sapiens chromosome 10 clone CH17-32B18, complete sequence	AC277832	218942	16	16	29	1	17	1197	1213	0
Urine EV replicated	tRF-18-MBQ4NKDJ	18	Homo sapiens chromosome 22 clone CH17-291K13, complete sequence	AC277824	205795	16	16	29	1	17	126692	126676	0
Urine EV replicated	tRF-18-MBQ4NKDJ	18	Homo sapiens chromosome 22 clone CH17-232B17, complete sequence	AC277820	245081	16	16	29	1	17	192897	192881	0
Urine EV replicated	tRF-18-MBQ4NKDJ	18	Homo sapiens chromosome 22 clone CH17-37O1, complete sequence	AC277766	45767	16	16	29	1	17	35246	35230	0
Urine EV replicated	tRF-18-MBQ4NKDJ	18	Homo sapiens BAC clone CH17-409N24 from chromosome 22, complete sequence	AC270110	197504	16	16	29	1	17	58510	58494	0
Urine EV replicated	tRF-18-MBQ4NKDJ	18	Homo sapiens H3K4me1 hESC enhancer GRCh37_chr17:81027516-81028068 (LOC127888597) on chromosome 17	NG_138184	753	16	16	29	2	18	573	589	0
Urine EV replicated	tRF-18-MBQ4NKDJ	18	Homo sapiens clone BMMD-RP3_181G22, complete sequence	KJ155484	166140	16	16	29	1	17	91128	91112	0
Urine EV replicated	tRF-18-MBQ4NKDJ	18	Homo sapiens clone BMMD-CH17_210L21, complete sequence	KJ155483	236556	16	16	29	1	17	66845	66861	0
Urine EV replicated	tRF-18-MBQ4NKDJ	18	Homo sapiens clone BMMD-CH17_116O7, complete sequence	KJ155477	213031	16	16	29	1	17	39206	39222	0
Urine EV replicated	tRF-18-MBQ4NKDJ	18	Homo sapiens clone BMMD-RP13_49D18, complete sequence	KJ155472	195344	16	16	29	1	17	136792	136808	0
Urine EV replicated	tRF-18-MBQ4NKDJ	18	Homo sapiens clone ABC9_3_5_000046294200_J1 chromosome 22 sequence, complete sequence	OL310227	41724	16	16	29	1	17	1134	1150	0
Urine EV replicated	tRF-18-MBQ4NKDJ	18	Homo sapiens platelet activating factor receptor (PTAFR), transcript variant 1, mRNA	NM_001164721	4111	16	16	29	2	18	3880	3864	0
Urine EV replicated	tRF-18-MBQ4NKDJ	18	Homo sapiens chromosome unknown clone VMRC59-305D15, complete sequence	AC279656	166831	16	16	29	1	17	26841	26857	0
Urine EV replicated	tRF-18-MBQ4NKDJ	18	Homo sapiens chromosome unknown clone VMRC59-218D02, complete sequence	AC279547	142752	16	16	29	1	17	94013	93997	0
Urine EV replicated	tRF-18-MBQ4NKDJ	18	Homo sapiens platelet activating factor receptor (PTAFR), RefSeqGene on chromosome 1	NG_029815	53771	16	16	29	2	18	51540	51524	0
Urine EV replicated	tRF-18-MBQ4NKDJ	18	Homo sapiens diacylglycerol kinase delta (DGKD), RefSeqGene on chromosome 2	NG_029495	124591	16	16	29	1	17	38584	38600	0
Urine EV replicated	tRF-18-MBQ4NKDJ	18	Homo sapiens BAC clone CH17-420I24 from chromosome 22, complete sequence	AC244250	210075	16	16	29	1	17	92761	92777	0
Urine EV replicated	tRF-18-MBQ4NKDJ	18	Homo sapiens BAC clone CH17-475O7 from chromosome 22, complete sequence	AC244157	206505	16	16	29	1	17	153287	153271	0
Urine EV replicated	tRF-18-MBQ4NKDJ	18	Homo sapiens FOSMID clone ABC12-49077700J21 from chromosome 22, complete sequence	AC242391	38680	16	16	29	1	17	9329	9345	0
Urine EV replicated	tRF-18-MBQ4NKDJ	18	Homo sapiens immunoglobulin lambda locus (IGL) on chromosome 22	NG_000002	909203	16	16	29	1	17	608479	608495	0
Urine EV replicated	tRF-18-MBQ4NKDJ	18	Homo sapiens POM121 transmembrane nucleoporin like 7 pseudogene (POM121L7P) on chromosome 22	NG_009026	15505	16	16	29	1	17	2620	2604	0
Urine EV replicated	tRF-18-MBQ4NKDJ	18	Homo sapiens POM121 transmembrane nucleoporin like 10, pseudogene (POM121L10P), non-coding RNA	NR_024593	9547	16	16	29	1	17	2447	2431	0
Urine EV replicated	tRF-18-MBQ4NKDJ	18	Homo sapiens CH98-18 translocation breakpoint region	EF025176	6083	16	16	29	1	17	1646	1662	0
Urine EV replicated	tRF-18-MBQ4NKDJ	18	Human DNA sequence from clone RP1-90K10 on chromosome 6, complete sequence	AL122034	133154	16	16	29	2	18	91733	91717	0
Urine EV replicated	tRF-18-MBQ4NKDJ	18	Human DNA sequence from clone RP11-30A6 on chromosome 10, complete sequence	AL355858	191575	16	16	29	2	18	48806	48790	0
Urine EV replicated	tRF-18-MBQ4NKDJ	18	Human DNA sequence from clone RP11-20F24 on chromosome 10p11.21-12.1, complete sequence	AL157387	149730	16	16	29	1	17	49590	49574	0
Urine EV replicated	tRF-18-MBQ4NKDJ	18	Human DNA sequence from clone RP4-568F9 on chromosome 20, complete sequence	AL049646	155432	16	16	29	2	18	117410	117426	0
Urine EV replicated	tRF-18-MBQ4NKDJ	18	Human DNA sequence from clone RP5-831C21 on chromosome 20, complete sequence	AL133466	117890	16	16	29	1	17	35970	35954	0
Urine EV replicated	tRF-18-MBQ4NKDJ	18	Homo sapiens chromosome 17, clone RP11-1197K16, complete sequence	AC130371	195613	16	16	29	2	18	33466	33450	0
Urine EV replicated	tRF-18-MBQ4NKDJ	18	Homo sapiens chromosome 17, clone RP13-629P20, complete sequence	AC127518	166080	16	16	29	2	18	25263	25247	0
Urine EV replicated	tRF-18-MBQ4NKDJ	18	Homo sapiens chromosome 22 clone pac699j1 map 22q12, complete sequence	AC008103	98557	16	16	29	1	17	3390	3374	0
Urine EV replicated	tRF-18-MBQ4NKDJ	18	Homo sapiens chromosome 22 clone b659m11 map 22q11, complete sequence	AC023491	150754	16	16	29	1	17	10511	10527	0
Urine EV replicated	tRF-18-MBQ4NKDJ	18	Homo sapiens clone b2262a2, complete sequence	AC012330	105288	16	16	29	1	17	16707	16723	0
Urine EV replicated	tRF-18-MBQ4NKDJ	18	Homo sapiens chromosome 22 clone b291 map 22q11, complete sequence	AC007981	175358	16	16	29	1	17	136260	136244	0
Urine EV replicated	tRF-18-MBQ4NKDJ	18	Homo sapiens BAC clone RP11-400N9 from 2, complete sequence	AC013726	214647	16	16	29	1	17	32272	32256	0
Urine EV replicated	tRF-18-MBQ4NKDJ	18	Homo sapiens chromosome 22 clone b379n11 map 22q11, complete sequence	AC008018	180884	16	16	29	1	17	46791	46807	0
Urine EV replicated	tRF-18-MBQ4NKDJ	18	Homo sapiens chromosome 22 clone b293 map 22q11, complete sequence	AC007324	122364	16	16	29	1	17	107151	107167	0
Urine EV replicated	tRF-18-MBQ4NKDJ	18	Homo sapiens Chromosome 22q11.2 Cosmid Clone clone88 In BCRL2-GGT Region, complete sequence	AC002054	43881	16	16	29	1	17	40713	40729	0
Urine EV replicated	tRF-18-MBQ4NKDJ	18	Homo sapiens Chromosome 22q11.2 Cosmid Clone 26a1 In BCRL2-GGT Region, complete sequence	AC002051	34539	16	16	29	1	17	26268	26284	0
Urine EV replicated	tRF-18-MBQ4NKDJ	18	Homo sapiens Chromosome 22q11.2 Cosmid Clone 31f3 In IGLC Region, complete sequence	AC000051	35687	16	16	29	1	17	15875	15891	0
Urine EV replicated	tRF-20-40KK5Y93	20	Homo sapiens OCT4-NANOG-H3K27ac-H3K4me1 hESC enhancer GRCh37_chr17:73029803-73030784 (LOC127887917) on chromosome 17	NG_137536	1182	20	20	40	1	20	333	352	0
Urine EV replicated	tRF-20-40KK5Y93	20	Homo sapiens OCT4-NANOG-H3K27ac-H3K4me1 hESC enhancer GRCh37_chr17:73029803-73030784 (LOC127887917) on chromosome 17	NG_137536	1182	20	20	40	1	20	862	843	0
Urine EV replicated	tRF-20-40KK5Y93	20	TPA: Homo sapiens tRNA-Arg-CCT-5-1 gene	HG983609	73	20	20	40	1	20	35	54	0
Urine EV replicated	tRF-20-40KK5Y93	20	TPA: Mus musculus tRNA-Arg-CCT-4-1 gene >gi|634723553|tpe|HG984673.1| TPA: Rattus norvegicus tRNA-Arg-CCT-5-1 gene >gi|634726690|tpe|HG983608.1| TPA: Homo sapiens tRNA-Arg-CCT-4-1 gene	HG983608	73	20	20	40	1	20	35	54	0
Urine EV replicated	tRF-20-40KK5Y93	20	TPA: Mus musculus tRNA-Arg-CCT-3-1 gene >gi|634723552|tpe|HG984672.1| TPA: Rattus norvegicus tRNA-Arg-CCT-4-1 gene >gi|634726683|tpe|HG983607.1| TPA: Homo sapiens tRNA-Arg-CCT-3-1 gene	HG983607	73	20	20	40	1	20	35	54	0
Urine EV replicated	tRF-20-40KK5Y93	20	TPA: Mus musculus tRNA-Arg-CCT-1-1 gene >gi|634723545|tpe|HG984667.1| TPA: Rattus norvegicus tRNA-Arg-CCT-1-1 gene >gi|634723546|tpe|HG984668.1| TPA: Rattus norvegicus tRNA-Arg-CCT-1-2 gene >gi|634723547|tpe|HG984669.1| TPA: Rattus norvegicus tRNA-Arg-CCT-1-3 gene >gi|634726680|tpe|HG983605.1| TPA: Homo sapiens tRNA-Arg-CCT-1-1 gene	HG983605	73	20	20	40	1	20	35	54	0
Urine EV replicated	tRF-20-40KK5Y93	20	TPA: Mus musculus tRNA-Arg-CCT-2-1 gene >gi|634722724|tpe|HG984224.1| TPA: Mus musculus tRNA-Arg-CCT-2-2 gene >gi|634723550|tpe|HG984671.1| TPA: Rattus norvegicus tRNA-Arg-CCT-3-1 gene >gi|634726682|tpe|HG983606.1| TPA: Homo sapiens tRNA-Arg-CCT-2-1 gene	HG983606	73	20	20	40	1	20	35	54	0
Urine EV replicated	tRF-20-40KK5Y93	20	Homo sapiens isolate CHM13 chromosome 17	CP068261	84276897	20	20	40	1	20	75925687	75925706	0
Urine EV replicated	tRF-20-40KK5Y93	20	Homo sapiens isolate CHM13 chromosome 17	CP068261	84276897	20	20	40	1	20	75926216	75926197	0
Urine EV replicated	tRF-20-40KK5Y93	20	Homo sapiens isolate CHM13 chromosome 17	CP068261	84276897	16	16	32	5	20	39414938	39414923	0
Urine EV replicated	tRF-20-40KK5Y93	20	Homo sapiens isolate CHM13 chromosome 17	CP068261	84276897	15	15	30	4	18	43043774	43043760	0
Urine EV replicated	tRF-20-40KK5Y93	20	Homo sapiens isolate CHM13 chromosome 17	CP068261	84276897	16	16	29	3	19	41424893	41424909	0
Urine EV replicated	tRF-20-40KK5Y93	20	Homo sapiens isolate CHM13 chromosome 17	CP068261	84276897	16	16	29	3	19	78112296	78112312	0
Urine EV replicated	tRF-20-40KK5Y93	20	Homo sapiens isolate CHM13 chromosome 17	CP068261	84276897	14	14	28	1	14	5425090	5425077	0
Urine EV replicated	tRF-20-40KK5Y93	20	Homo sapiens isolate CHM13 chromosome 17	CP068261	84276897	14	14	28	1	14	12586840	12586827	0
Urine EV replicated	tRF-20-40KK5Y93	20	Homo sapiens isolate CHM13 chromosome 17	CP068261	84276897	14	14	28	3	16	32641421	32641408	0
Urine EV replicated	tRF-20-40KK5Y93	20	Homo sapiens isolate CHM13 chromosome 17	CP068261	84276897	14	14	28	1	14	75638049	75638036	0
Urine EV replicated	tRF-20-40KK5Y93	20	Homo sapiens isolate CHM13 chromosome 16	CP068262	96330374	20	20	40	1	20	3179535	3179554	0
Urine EV replicated	tRF-20-40KK5Y93	20	Homo sapiens isolate CHM13 chromosome 16	CP068262	96330374	20	20	40	1	20	3220562	3220581	0
Urine EV replicated	tRF-20-40KK5Y93	20	Homo sapiens isolate CHM13 chromosome 16	CP068262	96330374	15	15	30	1	15	5652574	5652560	0
Urine EV replicated	tRF-20-40KK5Y93	20	Homo sapiens isolate CHM13 chromosome 16	CP068262	96330374	15	15	30	5	19	63551831	63551817	0
Urine EV replicated	tRF-20-40KK5Y93	20	Homo sapiens isolate CHM13 chromosome 16	CP068262	96330374	16	16	29	4	20	21881260	21881276	0
Urine EV replicated	tRF-20-40KK5Y93	20	Homo sapiens isolate CHM13 chromosome 16	CP068262	96330374	16	16	29	1	17	81043921	81043937	0
Urine EV replicated	tRF-20-40KK5Y93	20	Homo sapiens isolate CHM13 chromosome 16	CP068262	96330374	14	14	28	2	15	11331161	11331148	0
Urine EV replicated	tRF-20-40KK5Y93	20	Homo sapiens isolate CHM13 chromosome 16	CP068262	96330374	14	14	28	5	18	15776904	15776891	0
Urine EV replicated	tRF-20-40KK5Y93	20	Homo sapiens isolate CHM13 chromosome 16	CP068262	96330374	14	14	28	3	16	17103912	17103925	0
Urine EV replicated	tRF-20-40KK5Y93	20	Homo sapiens isolate CHM13 chromosome 16	CP068262	96330374	14	14	28	6	19	31421800	31421813	0
Urine EV replicated	tRF-20-40KK5Y93	20	Homo sapiens isolate CHM13 chromosome 16	CP068262	96330374	14	14	28	4	17	72484840	72484853	0
Urine EV replicated	tRF-20-40KK5Y93	20	Homo sapiens isolate CHM13 chromosome 16	CP068262	96330374	14	14	28	5	18	75293980	75293967	0
Urine EV replicated	tRF-20-40KK5Y93	20	Homo sapiens isolate CHM13 chromosome 16	CP068262	96330374	14	14	28	6	19	76250394	76250407	0
Urine EV replicated	tRF-20-40KK5Y93	20	Homo sapiens DNA, chromosome 17, nearly complete genome	AP023477	80688777	20	20	40	1	20	72520262	72520281	0
Urine EV replicated	tRF-20-40KK5Y93	20	Homo sapiens DNA, chromosome 17, nearly complete genome	AP023477	80688777	20	20	40	1	20	72520791	72520772	0
Urine EV replicated	tRF-20-40KK5Y93	20	Homo sapiens DNA, chromosome 17, nearly complete genome	AP023477	80688777	16	16	32	5	20	36305249	36305234	0
Urine EV replicated	tRF-20-40KK5Y93	20	Homo sapiens DNA, chromosome 17, nearly complete genome	AP023477	80688777	17	17	31	1	18	55647325	55647308	0
Urine EV replicated	tRF-20-40KK5Y93	20	Homo sapiens DNA, chromosome 17, nearly complete genome	AP023477	80688777	15	15	30	4	18	39941999	39941985	0
Urine EV replicated	tRF-20-40KK5Y93	20	Homo sapiens DNA, chromosome 17, nearly complete genome	AP023477	80688777	16	16	29	3	19	38313952	38313968	0
Urine EV replicated	tRF-20-40KK5Y93	20	Homo sapiens DNA, chromosome 17, nearly complete genome	AP023477	80688777	16	16	29	3	19	74711341	74711357	0
Urine EV replicated	tRF-20-40KK5Y93	20	Homo sapiens DNA, chromosome 17, nearly complete genome	AP023477	80688777	14	14	28	1	14	12766906	12766893	0
Urine EV replicated	tRF-20-40KK5Y93	20	Homo sapiens DNA, chromosome 17, nearly complete genome	AP023477	80688777	14	14	28	3	16	29779646	29779633	0
Urine EV replicated	tRF-20-40KK5Y93	20	Homo sapiens DNA, chromosome 17, nearly complete genome	AP023477	80688777	14	14	28	1	14	72232476	72232463	0
Urine EV replicated	tRF-20-40KK5Y93	20	Homo sapiens DNA, chromosome 16, nearly complete genome	AP023476	94690957	20	20	40	1	20	3191800	3191819	0
Urine EV replicated	tRF-20-40KK5Y93	20	Homo sapiens DNA, chromosome 16, nearly complete genome	AP023476	94690957	20	20	40	1	20	3232811	3232830	0
Urine EV replicated	tRF-20-40KK5Y93	20	Homo sapiens DNA, chromosome 16, nearly complete genome	AP023476	94690957	15	15	30	1	15	5695080	5695066	0
Urine EV replicated	tRF-20-40KK5Y93	20	Homo sapiens DNA, chromosome 16, nearly complete genome	AP023476	94690957	15	15	30	5	19	62152565	62152551	0
Urine EV replicated	tRF-20-40KK5Y93	20	Homo sapiens DNA, chromosome 16, nearly complete genome	AP023476	94690957	16	16	29	4	20	20473047	20473063	0
Urine EV replicated	tRF-20-40KK5Y93	20	Homo sapiens DNA, chromosome 16, nearly complete genome	AP023476	94690957	16	16	29	1	17	79524485	79524501	0
Urine EV replicated	tRF-20-40KK5Y93	20	Homo sapiens DNA, chromosome 16, nearly complete genome	AP023476	94690957	14	14	28	2	15	11375134	11375121	0
Urine EV replicated	tRF-20-40KK5Y93	20	Homo sapiens DNA, chromosome 16, nearly complete genome	AP023476	94690957	14	14	28	5	18	15304649	15304636	0
Urine EV replicated	tRF-20-40KK5Y93	20	Homo sapiens DNA, chromosome 16, nearly complete genome	AP023476	94690957	14	14	28	3	16	16296128	16296141	0
Urine EV replicated	tRF-20-40KK5Y93	20	Homo sapiens DNA, chromosome 16, nearly complete genome	AP023476	94690957	14	14	28	6	19	29075228	29075241	0
Urine EV replicated	tRF-20-40KK5Y93	20	Homo sapiens DNA, chromosome 16, nearly complete genome	AP023476	94690957	14	14	28	2	15	68626089	68626076	0
Urine EV replicated	tRF-20-40KK5Y93	20	Homo sapiens DNA, chromosome 16, nearly complete genome	AP023476	94690957	14	14	28	4	17	71088048	71088061	0
Urine EV replicated	tRF-20-40KK5Y93	20	Homo sapiens DNA, chromosome 16, nearly complete genome	AP023476	94690957	14	14	28	5	18	73895036	73895023	0
Urine EV replicated	tRF-20-40KK5Y93	20	Homo sapiens DNA, chromosome 16, nearly complete genome	AP023476	94690957	14	14	28	6	19	74843221	74843234	0
Urine EV replicated	tRF-20-40KK5Y93	20	Homo sapiens LUC7 like 2, pre-mRNA splicing factor (LUC7L2), RefSeqGene on chromosome 7	NG_030012	90079	20	20	40	1	20	5356	5375	0
Urine EV replicated	tRF-20-40KK5Y93	20	Homo sapiens familial mediterranean fever locus genomic sequence	AF091512	87258	20	20	40	1	20	18141	18160	0
Urine EV replicated	tRF-20-40KK5Y93	20	Homo sapiens familial mediterranean fever locus genomic sequence	AF091512	87258	20	20	40	1	20	59265	59284	0
Urine EV replicated	tRF-20-40KK5Y93	20	Homo sapiens BAC clone RP11-634H22 from 7, complete sequence	AC083880	38486	20	20	40	1	20	6924	6943	0
Urine EV replicated	tRF-20-40KK5Y93	20	Homo sapiens chromosome 16 clone RP11-473M20, complete sequence	AC108134	180354	20	20	40	1	20	164458	164477	0
Urine EV replicated	tRF-20-40KK5Y93	20	Homo sapiens chromosome 17, clone RP11-309N17, complete sequence	AC087651	197148	20	20	40	1	20	180929	180948	0
Urine EV replicated	tRF-20-40KK5Y93	20	Homo sapiens chromosome 17, clone RP11-309N17, complete sequence	AC087651	197148	20	20	40	1	20	181458	181439	0
Urine EV replicated	tRF-20-40KK5Y93	20	Homo sapiens chromosome 17, clone RP11-1112G13, complete sequence	AC111186	145601	20	20	40	1	20	81580	81599	0
Urine EV replicated	tRF-20-40KK5Y93	20	Homo sapiens chromosome 17, clone RP11-1112G13, complete sequence	AC111186	145601	20	20	40	1	20	82109	82090	0
Urine EV replicated	tRF-20-40KK5Y93	20	Homo sapiens complete genomic sequence between D16S3070 and D16S3275, containing Familial Mediterranean Fever gene disease	AJ003147	239566	20	20	40	1	20	112155	112174	0
Urine EV replicated	tRF-20-40KK5Y93	20	Homo sapiens complete genomic sequence between D16S3070 and D16S3275, containing Familial Mediterranean Fever gene disease	AJ003147	239566	20	20	40	1	20	153181	153200	0
Urine EV replicated	tRF-20-40KK5Y93	20	Homo sapiens microRNA miR-163	AJ535831	21	19	19	38	2	20	1	19	0
Urine EV replicated	tRF-20-40KK5Y93	20	Homo sapiens transmembrane protein 123 (TMEM123), mRNA	NM_052932	3304	18	18	36	2	19	1809	1826	0
Urine EV replicated	tRF-20-40KK5Y93	20	Homo sapiens piRNA piR-30229, complete sequence	DQ570117	31	18	18	36	3	20	1	18	0
Urine EV replicated	tRF-20-40KK5Y93	20	Homo sapiens cDNA PSEC0111 fis, clone NT2RP2006028, moderately similar to Pro-oncosis receptor inducing membrane injury gene	AK075420	3362	18	18	36	2	19	1871	1888	0
Urine EV replicated	tRF-20-40KK5Y93	20	Homo sapiens transmembrane protein 123, mRNA (cDNA clone MGC:40439 IMAGE:4340763), complete cds	BC032296	3282	18	18	36	2	19	1774	1791	0
Urine EV replicated	tRF-20-40KK5Y93	20	Homo sapiens porimin mRNA, complete cds	AY008283	3338	18	18	36	2	19	1825	1842	0
Urine EV replicated	tRF-20-40KK5Y93	20	Homo sapiens genomic DNA, chromosome 11 clone:RP11-864G5, complete sequence	AP000942	185984	18	18	36	2	19	173171	173154	0
Urine EV replicated	tRF-20-40KK5Y93	20	Homo sapiens genomic DNA, chromosome 11 clone:RP11-315O6, complete sequence	AP001830	214483	18	18	36	2	19	49116	49099	0
Urine EV replicated	tRF-20-40KK5Y93	20	Homo sapiens mRNA; cDNA DKFZp586A2324 (from clone DKFZp586A2324)	AL137643	1562	18	18	36	2	19	41	58	0
Urine EV replicated	tRF-20-40KK5Y93	20	Homo sapiens mRNA; cDNA DKFZp586I2022 (from clone DKFZp586I2022)	AL110202	2535	18	18	36	2	19	1027	1044	0
Urine EV replicated	tRF-20-40KK5Y93	20	Homo sapiens mRNA; cDNA DKFZp586B0222 (from clone DKFZp586B0222)	AL050161	1590	18	18	36	2	19	82	99	0
Urine EV replicated	tRF-20-40KK5Y93	20	Homo sapiens seizure related 6 homolog like (SEZ6L), RefSeqGene on chromosome 22	NG_054877	221124	17	17	34	2	18	174698	174682	0
Urine EV replicated	tRF-20-40KK5Y93	20	Homo sapiens isolate CHM13 chromosome 22	CP068256	51324926	17	17	34	2	18	26801433	26801417	0
Urine EV replicated	tRF-20-40KK5Y93	20	Homo sapiens isolate CHM13 chromosome 22	CP068256	51324926	14	14	28	5	18	22048906	22048919	0
Urine EV replicated	tRF-20-40KK5Y93	20	Homo sapiens isolate CHM13 chromosome 22	CP068256	51324926	14	14	28	6	19	24999646	24999659	0
Urine EV replicated	tRF-20-40KK5Y93	20	Homo sapiens isolate CHM13 chromosome 22	CP068256	51324926	14	14	28	1	14	36797568	36797555	0
Urine EV replicated	tRF-20-40KK5Y93	20	Homo sapiens isolate CHM13 chromosome 22	CP068256	51324926	14	14	28	6	19	41963137	41963150	0
Urine EV replicated	tRF-20-40KK5Y93	20	Homo sapiens isolate CHM13 chromosome 22	CP068256	51324926	14	14	28	6	19	48185066	48185079	0
Urine EV replicated	tRF-20-40KK5Y93	20	Homo sapiens isolate CHM13 chromosome 22	CP068256	51324926	14	14	28	4	17	50137116	50137103	0
Urine EV replicated	tRF-20-40KK5Y93	20	Homo sapiens isolate CHM13 chromosome 22	CP068256	51324926	14	14	28	6	19	50162638	50162625	0
Urine EV replicated	tRF-20-40KK5Y93	20	Homo sapiens DNA, chromosome 22, nearly complete genome	AP023482	46684173	17	17	34	2	18	22075137	22075121	0
Urine EV replicated	tRF-20-40KK5Y93	20	Homo sapiens DNA, chromosome 22, nearly complete genome	AP023482	46684173	14	14	28	5	18	17302190	17302203	0
Urine EV replicated	tRF-20-40KK5Y93	20	Homo sapiens DNA, chromosome 22, nearly complete genome	AP023482	46684173	14	14	28	6	19	20273216	20273229	0
Urine EV replicated	tRF-20-40KK5Y93	20	Homo sapiens DNA, chromosome 22, nearly complete genome	AP023482	46684173	14	14	28	1	14	32078032	32078019	0
Urine EV replicated	tRF-20-40KK5Y93	20	Homo sapiens DNA, chromosome 22, nearly complete genome	AP023482	46684173	14	14	28	6	19	37261724	37261737	0
Urine EV replicated	tRF-20-40KK5Y93	20	Homo sapiens DNA, chromosome 22, nearly complete genome	AP023482	46684173	14	14	28	6	19	43553699	43553712	0
Urine EV replicated	tRF-20-40KK5Y93	20	Homo sapiens DNA, chromosome 22, nearly complete genome	AP023482	46684173	14	14	28	4	17	45508602	45508589	0
Urine EV replicated	tRF-20-40KK5Y93	20	Homo sapiens DNA, chromosome 22, nearly complete genome	AP023482	46684173	14	14	28	6	19	45534356	45534343	0
Urine EV replicated	tRF-20-40KK5Y93	20	Homo sapiens ATM serine/threonine kinase (ATM), RefSeqGene (LRG_135) on chromosome 11	NG_009830	153268	17	17	34	2	18	72651	72667	0
Urine EV replicated	tRF-20-40KK5Y93	20	Homo sapiens ataxia telangiectasia mutated, mRNA (cDNA clone IMAGE:4290281), with apparent retained intron	BC022307	1731	17	17	34	2	18	1546	1562	0
Urine EV replicated	tRF-20-40KK5Y93	20	Human DNA sequence from clone RP1-268D13 on chromosome 22q11.21-12.2, complete sequence	AL023513	115863	17	17	34	2	18	75192	75176	0
Urine EV replicated	tRF-20-40KK5Y93	20	Homo sapiens ataxia telangiectasia mutated (includes complementation groups A, C and D) (ATM) gene, partial cds	AY220758	115612	17	17	34	2	18	69264	69280	0
Urine EV replicated	tRF-20-40KK5Y93	20	Homo sapiens genomic DNA, chromosome 11 clone:RP11-241D13, complete sequence	AP001925	180163	17	17	34	2	18	124525	124541	0
Urine EV replicated	tRF-20-40KK5Y93	20	Homo sapiens genomic DNA, chromosome 11q clone:CMB9-21A6, complete sequence	AP000838	109666	17	17	34	2	18	13709	13725	0
Urine EV replicated	tRF-20-40KK5Y93	20	Homo sapiens ataxia telangiectasia (ATM) gene, complete cds	U82828	184490	17	17	34	2	18	78159	78175	0
Urine EV replicated	tRF-20-40KK5Y93	20	Homo sapiens isolate CHM13 chromosome 20	CP068258	66210255	16	16	32	4	19	51926824	51926809	0
Urine EV replicated	tRF-20-40KK5Y93	20	Homo sapiens isolate CHM13 chromosome 20	CP068258	66210255	15	15	30	4	18	54954738	54954752	0
Urine EV replicated	tRF-20-40KK5Y93	20	Homo sapiens isolate CHM13 chromosome 20	CP068258	66210255	15	15	30	1	15	57481010	57480996	0
Urine EV replicated	tRF-20-40KK5Y93	20	Homo sapiens isolate CHM13 chromosome 20	CP068258	66210255	16	16	29	2	18	6187372	6187388	0
Urine EV replicated	tRF-20-40KK5Y93	20	Homo sapiens isolate CHM13 chromosome 20	CP068258	66210255	17	17	28	1	19	2494668	2494650	0
Urine EV replicated	tRF-20-40KK5Y93	20	Homo sapiens isolate CHM13 chromosome 20	CP068258	66210255	14	14	28	3	16	31432282	31432295	0
Urine EV replicated	tRF-20-40KK5Y93	20	Homo sapiens isolate CHM13 chromosome 20	CP068258	66210255	14	14	28	4	17	36592872	36592859	0
Urine EV replicated	tRF-20-40KK5Y93	20	Homo sapiens isolate CHM13 chromosome 20	CP068258	66210255	14	14	28	5	18	48140672	48140659	0
Urine EV replicated	tRF-20-40KK5Y93	20	Homo sapiens isolate CHM13 chromosome 20	CP068258	66210255	14	14	28	7	20	53331509	53331496	0
Urine EV replicated	tRF-20-40KK5Y93	20	Homo sapiens isolate CHM13 chromosome 19	CP068259	61707364	16	16	32	5	20	18727472	18727487	0
Urine EV replicated	tRF-20-40KK5Y93	20	Homo sapiens isolate CHM13 chromosome 19	CP068259	61707364	15	15	30	5	19	487085	487099	0
Urine EV replicated	tRF-20-40KK5Y93	20	Homo sapiens isolate CHM13 chromosome 19	CP068259	61707364	16	16	29	1	17	37798431	37798447	0
Urine EV replicated	tRF-20-40KK5Y93	20	Homo sapiens isolate CHM13 chromosome 19	CP068259	61707364	14	14	28	7	20	17450859	17450872	0
Urine EV replicated	tRF-20-40KK5Y93	20	Homo sapiens isolate CHM13 chromosome 19	CP068259	61707364	14	14	28	1	14	31642286	31642273	0
Urine EV replicated	tRF-20-40KK5Y93	20	Homo sapiens isolate CHM13 chromosome 18	CP068260	80542538	16	16	32	5	20	42019352	42019337	0
Urine EV replicated	tRF-20-40KK5Y93	20	Homo sapiens isolate CHM13 chromosome 18	CP068260	80542538	16	16	32	4	19	61794946	61794931	0
Urine EV replicated	tRF-20-40KK5Y93	20	Homo sapiens isolate CHM13 chromosome 18	CP068260	80542538	15	15	30	6	20	4889632	4889646	0
Urine EV replicated	tRF-20-40KK5Y93	20	Homo sapiens isolate CHM13 chromosome 18	CP068260	80542538	18	18	30	1	20	46544842	46544861	0
Urine EV replicated	tRF-20-40KK5Y93	20	Homo sapiens isolate CHM13 chromosome 18	CP068260	80542538	15	15	30	5	19	64200451	64200437	0
Urine EV replicated	tRF-20-40KK5Y93	20	Homo sapiens isolate CHM13 chromosome 18	CP068260	80542538	16	16	29	2	18	8816480	8816496	0
Urine EV replicated	tRF-20-40KK5Y93	20	Homo sapiens isolate CHM13 chromosome 18	CP068260	80542538	16	16	29	2	18	23799641	23799625	0
Urine EV replicated	tRF-20-40KK5Y93	20	Homo sapiens isolate CHM13 chromosome 18	CP068260	80542538	14	14	28	1	14	13771510	13771497	0
Urine EV replicated	tRF-20-40KK5Y93	20	Homo sapiens isolate CHM13 chromosome 18	CP068260	80542538	14	14	28	4	17	37603856	37603843	0
Urine EV replicated	tRF-20-40KK5Y93	20	Homo sapiens isolate CHM13 chromosome 18	CP068260	80542538	14	14	28	7	20	59770919	59770906	0
Urine EV replicated	tRF-20-40KK5Y93	20	Homo sapiens DNA, chromosome 20, nearly complete genome	AP023480	62398354	16	16	32	4	19	48219786	48219771	0
Urine EV replicated	tRF-20-40KK5Y93	20	Homo sapiens DNA, chromosome 20, nearly complete genome	AP023480	62398354	15	15	30	4	18	51245804	51245818	0
Urine EV replicated	tRF-20-40KK5Y93	20	Homo sapiens DNA, chromosome 20, nearly complete genome	AP023480	62398354	15	15	30	1	15	53769567	53769553	0
Urine EV replicated	tRF-20-40KK5Y93	20	Homo sapiens DNA, chromosome 20, nearly complete genome	AP023480	62398354	16	16	29	2	18	6080503	6080519	0
Urine EV replicated	tRF-20-40KK5Y93	20	Homo sapiens DNA, chromosome 20, nearly complete genome	AP023480	62398354	17	17	28	1	19	2394938	2394920	0
Urine EV replicated	tRF-20-40KK5Y93	20	Homo sapiens DNA, chromosome 20, nearly complete genome	AP023480	62398354	14	14	28	4	17	32894261	32894248	0
Urine EV replicated	tRF-20-40KK5Y93	20	Homo sapiens DNA, chromosome 20, nearly complete genome	AP023480	62398354	14	14	28	5	18	44440031	44440018	0
Urine EV replicated	tRF-20-40KK5Y93	20	Homo sapiens DNA, chromosome 20, nearly complete genome	AP023480	62398354	14	14	28	7	20	49623085	49623072	0
Urine EV replicated	tRF-20-40KK5Y93	20	Homo sapiens DNA, chromosome 20, nearly complete genome	AP023480	62398354	14	14	28	1	14	61177652	61177665	0
Urine EV replicated	tRF-20-40KK5Y93	20	Homo sapiens DNA, chromosome 19, nearly complete genome	AP023479	59105444	16	16	32	5	20	18485263	18485278	0
Urine EV replicated	tRF-20-40KK5Y93	20	Homo sapiens DNA, chromosome 19, nearly complete genome	AP023479	59105444	15	15	30	5	19	295022	295036	0
Urine EV replicated	tRF-20-40KK5Y93	20	Homo sapiens DNA, chromosome 19, nearly complete genome	AP023479	59105444	15	15	30	5	19	371715	371729	0
Urine EV replicated	tRF-20-40KK5Y93	20	Homo sapiens DNA, chromosome 19, nearly complete genome	AP023479	59105444	16	16	29	1	17	35411807	35411823	0
Urine EV replicated	tRF-20-40KK5Y93	20	Homo sapiens DNA, chromosome 19, nearly complete genome	AP023479	59105444	14	14	28	7	20	17208618	17208631	0
Urine EV replicated	tRF-20-40KK5Y93	20	Homo sapiens DNA, chromosome 19, nearly complete genome	AP023479	59105444	14	14	28	1	14	29254016	29254003	0
Urine EV replicated	tRF-20-40KK5Y93	20	Homo sapiens DNA, chromosome 18, nearly complete genome	AP023478	77846715	16	16	32	5	20	39270491	39270476	0
Urine EV replicated	tRF-20-40KK5Y93	20	Homo sapiens DNA, chromosome 18, nearly complete genome	AP023478	77846715	16	16	32	4	19	59049124	59049109	0
Urine EV replicated	tRF-20-40KK5Y93	20	Homo sapiens DNA, chromosome 18, nearly complete genome	AP023478	77846715	15	15	30	6	20	4745208	4745222	0
Urine EV replicated	tRF-20-40KK5Y93	20	Homo sapiens DNA, chromosome 18, nearly complete genome	AP023478	77846715	18	18	30	1	20	43800369	43800388	0
Urine EV replicated	tRF-20-40KK5Y93	20	Homo sapiens DNA, chromosome 18, nearly complete genome	AP023478	77846715	15	15	30	5	19	61471248	61471234	0
Urine EV replicated	tRF-20-40KK5Y93	20	Homo sapiens DNA, chromosome 18, nearly complete genome	AP023478	77846715	16	16	29	2	18	8667563	8667579	0
Urine EV replicated	tRF-20-40KK5Y93	20	Homo sapiens DNA, chromosome 18, nearly complete genome	AP023478	77846715	16	16	29	2	18	21025662	21025646	0
Urine EV replicated	tRF-20-40KK5Y93	20	Homo sapiens DNA, chromosome 18, nearly complete genome	AP023478	77846715	14	14	28	1	14	13619158	13619145	0
Urine EV replicated	tRF-20-40KK5Y93	20	Homo sapiens DNA, chromosome 18, nearly complete genome	AP023478	77846715	14	14	28	4	17	34824321	34824308	0
Urine EV replicated	tRF-20-40KK5Y93	20	Homo sapiens DNA, chromosome 18, nearly complete genome	AP023478	77846715	14	14	28	7	20	57026116	57026103	0
Urine EV replicated	tRF-20-40KK5Y93	20	Homo sapiens BAC clone CH17-389I9 from chromosome unknown, complete sequence	AC244153	231845	16	16	32	5	20	41474	41489	0
Urine EV replicated	tRF-20-40KK5Y93	20	Homo sapiens cytokine receptor like factor 1 (CRLF1), RefSeqGene on chromosome 19	NG_013370	20626	16	16	32	5	20	19446	19431	0
Urine EV replicated	tRF-20-40KK5Y93	20	Homo sapiens SNAP25-interacting protein, mRNA (cDNA clone IMAGE:5423326), complete cds	BC033233	1332	16	16	32	5	20	1118	1133	0
Urine EV replicated	tRF-20-40KK5Y93	20	Homo sapiens chromosome 17, clone CTC-861O14, complete sequence	AC115090	173716	16	16	32	5	20	3143	3158	0
Urine EV replicated	tRF-20-40KK5Y93	20	Homo sapiens chromosome 18, clone RP11-879F14, complete sequence	AC090409	164204	16	16	32	4	19	68366	68381	0
Urine EV replicated	tRF-20-40KK5Y93	20	Human DNA sequence from clone RP11-127E22 on chromosome 10, complete sequence	AL157782	46185	16	16	32	3	18	24382	24397	0
Urine EV replicated	tRF-20-40KK5Y93	20	Human DNA sequence from clone RP1-104D1 on chromosome 6, complete sequence	AL159164	62464	16	16	32	3	18	36	51	0
Urine EV replicated	tRF-20-40KK5Y93	20	Human DNA sequence from clone RP11-112L6 on chromosome 20, complete sequence	AL161937	93399	16	16	32	4	19	1951	1936	0
Urine EV replicated	tRF-20-40KK5Y93	20	Human DNA sequence from clone RP1-235B9 on chromosome 6q15-16.1, complete sequence	AL121941	61884	16	16	32	3	18	65	50	0
Urine EV replicated	tRF-20-40KK5Y93	20	Homo sapiens chromosome 17, clone RP11-2L19, complete sequence	AC129916	167265	16	16	32	5	20	48907	48922	0
Urine EV replicated	tRF-20-40KK5Y93	20	Homo sapiens chromosome 18, clone RP11-10L17, complete sequence	AC011225	148835	16	16	32	5	20	110917	110932	0
Urine EV replicated	tRF-20-40KK5Y93	20	Homo sapiens chromosome 17 clone 1005, complete sequence	AC091529	157463	16	16	32	5	20	33944	33929	0
Urine EV replicated	tRF-20-40KK5Y93	20	Human DNA from chromosome 19 specific cosmid R30292, genomic sequence, complete sequence	AC003112	40668	16	16	32	5	20	14053	14068	0
Urine EV replicated	tRF-20-40KK5Y93	20	Homo sapiens epidermal growth factor receptor pathway substrate 8 (EPS8), RefSeqGene on chromosome 12	NG_041808	176255	17	17	31	3	20	84662	84679	0
Urine EV replicated	tRF-20-40KK5Y93	20	PREDICTED: Homo sapiens epidermal growth factor receptor pathway substrate 8 (EPS8), transcript variant X3, mRNA	XM_047428495	11368	17	17	31	3	20	3175	3192	0
Urine EV replicated	tRF-20-40KK5Y93	20	Homo sapiens eosinophil peroxidase (EPX), RefSeqGene on chromosome 17	NG_013020	19447	17	17	31	1	18	8132	8115	0
Urine EV replicated	tRF-20-40KK5Y93	20	Human DNA sequence from clone RP11-363D24 on chromosome 9, complete sequence	AL359552	84570	17	17	31	2	19	26759	26776	0
Urine EV replicated	tRF-20-40KK5Y93	20	Homo sapiens 12 BAC RP11-6B19 (Roswell Park Cancer Institute Human BAC Library) complete sequence	AC073651	165565	17	17	31	3	20	15196	15179	0
Urine EV replicated	tRF-20-40KK5Y93	20	Homo sapiens eosinophil peroxidase (EPX) gene, complete cds	DQ054598	15329	17	17	31	1	18	4811	4794	0
Urine EV replicated	tRF-20-40KK5Y93	20	Homo sapiens chromosome 5 clone CTC-421B9, complete sequence	AC008486	124124	17	17	31	1	18	117766	117749	0
Urine EV replicated	tRF-20-40KK5Y93	20	Homo sapiens chromosome 5 clone CTC-349J2, complete sequence	AC068660	172188	17	17	31	1	18	55316	55333	0
Urine EV replicated	tRF-20-40KK5Y93	20	Homo sapiens chromosome 17, clone hRPK.506_H_21, complete sequence	AC005962	162083	17	17	31	1	18	117481	117464	0
Urine EV replicated	tRF-20-40KK5Y93	20	Homo sapiens GDP-mannose pyrophosphorylase A (GMPPA), transcript variant 4, mRNA	NM_001374295	1838	15	15	30	5	19	179	165	0
Urine EV replicated	tRF-20-40KK5Y93	20	Homo sapiens GDP-mannose pyrophosphorylase A (GMPPA), transcript variant 2, mRNA	NM_205847	1833	15	15	30	5	19	179	165	0
Urine EV replicated	tRF-20-40KK5Y93	20	Homo sapiens chromosome 15 clone VMRC59-177A16, complete sequence	AC279051	148098	15	15	30	1	15	129242	129228	0
Urine EV replicated	tRF-20-40KK5Y93	20	Homo sapiens clone HEL-S-165 epididymis secretory sperm binding protein mRNA, complete cds	GQ891444	1880	15	15	30	5	19	163	149	0
Urine EV replicated	tRF-20-40KK5Y93	20	Homo sapiens receptor interacting serine/threonine kinase 1 (RIPK1), RefSeqGene on chromosome 6	NG_063914	58352	15	15	30	5	19	3487	3501	0
Urine EV replicated	tRF-20-40KK5Y93	20	Homo sapiens RNA binding fox-1 homolog 1 (RBFOX1), RefSeqGene on chromosome 16	NG_011881	2480592	15	15	30	1	15	388395	388381	0
Urine EV replicated	tRF-20-40KK5Y93	20	Homo sapiens selectin P (SELP), RefSeqGene on chromosome 1	NG_012125	48291	15	15	30	4	18	524	510	0
Urine EV replicated	tRF-20-40KK5Y93	20	Homo sapiens teashirt zinc finger homeobox 2 (TSHZ2), RefSeqGene on chromosome 20	NG_053184	530022	15	15	30	4	18	216165	216179	0
Urine EV replicated	tRF-20-40KK5Y93	20	Homo sapiens DLC1 Rho GTPase activating protein (DLC1), RefSeqGene on chromosome 8	NG_015998	528246	15	15	30	4	18	419269	419255	0
Urine EV replicated	tRF-20-40KK5Y93	20	Homo sapiens serpin family B member 8 (SERPINB8), RefSeqGene on chromosome 18	NG_052876	56752	15	15	30	5	19	30381	30367	0
Urine EV replicated	tRF-20-40KK5Y93	20	Homo sapiens katanin regulatory subunit B1 (KATNB1), RefSeqGene on chromosome 16	NG_046947	28531	15	15	30	5	19	25955	25941	0
Urine EV replicated	tRF-20-40KK5Y93	20	PREDICTED: Homo sapiens GDP-mannose pyrophosphorylase A (GMPPA), transcript variant X7, mRNA	XM_054341560	1992	15	15	30	5	19	179	165	0
Urine EV replicated	tRF-20-40KK5Y93	20	PREDICTED: Homo sapiens GDP-mannose pyrophosphorylase A (GMPPA), transcript variant X4, mRNA	XM_054341557	2012	15	15	30	5	19	179	165	0
Urine EV replicated	tRF-20-40KK5Y93	20	PREDICTED: Homo sapiens GDP-mannose pyrophosphorylase A (GMPPA), transcript variant X3, mRNA	XM_054341556	2007	15	15	30	5	19	179	165	0
Urine EV replicated	tRF-20-40KK5Y93	20	Homo sapiens H3K4me1 hESC enhancer GRCh37_chr13:112055149-112055694 (LOC127826954) on chromosome 13	NG_128459	746	15	15	30	6	20	352	366	0
Urine EV replicated	tRF-20-40KK5Y93	20	Homo sapiens H3K27ac-H3K4me1 hESC enhancer GRCh37_chr7:2207917-2208590 (LOC127408240) on chromosome 7	NG_110208	874	15	15	30	4	18	690	704	0
Urine EV replicated	tRF-20-40KK5Y93	20	Homo sapiens talin 2 (TLN2), RefSeqGene on chromosome 15	NG_033932	461082	15	15	30	1	15	12347	12333	0
Urine EV replicated	tRF-20-40KK5Y93	20	Homo sapiens myosin XVI (MYO16), RefSeqGene on chromosome 13	NG_053147	719290	15	15	30	5	19	599751	599765	0
Urine EV replicated	tRF-20-40KK5Y93	20	Homo sapiens mitotic arrest deficient 1 like 1 (MAD1L1), RefSeqGene on chromosome 7; nuclear gene for mitochondrial product	NG_011518	424151	15	15	30	4	18	69074	69060	0
Urine EV replicated	tRF-20-40KK5Y93	20	PREDICTED: Homo sapiens GDP-mannose pyrophosphorylase A (GMPPA), transcript variant X7, mRNA	XM_047444029	1992	15	15	30	5	19	179	165	0
Urine EV replicated	tRF-20-40KK5Y93	20	PREDICTED: Homo sapiens GDP-mannose pyrophosphorylase A (GMPPA), transcript variant X4, mRNA	XM_047444026	2012	15	15	30	5	19	179	165	0
Urine EV replicated	tRF-20-40KK5Y93	20	PREDICTED: Homo sapiens GDP-mannose pyrophosphorylase A (GMPPA), transcript variant X3, mRNA	XM_047444025	2007	15	15	30	5	19	179	165	0
Urine EV replicated	tRF-20-40KK5Y93	20	Homo sapiens family with sequence similarity 120C (FAM120C), RefSeqGene on chromosome X	NG_021316	121879	15	15	30	5	19	24778	24764	0
Urine EV replicated	tRF-20-40KK5Y93	20	Homo sapiens GDP-mannose pyrophosphorylase A (GMPPA), RefSeqGene on chromosome 2	NG_033833	15132	15	15	30	5	19	5205	5191	0
Urine EV replicated	tRF-20-40KK5Y93	20	Homo sapiens isolate CHM13 chromosome 15	CP068263	99753195	15	15	30	5	19	50695185	50695171	0
Urine EV replicated	tRF-20-40KK5Y93	20	Homo sapiens isolate CHM13 chromosome 15	CP068263	99753195	15	15	30	5	19	54389985	54389999	0
Urine EV replicated	tRF-20-40KK5Y93	20	Homo sapiens isolate CHM13 chromosome 15	CP068263	99753195	15	15	30	1	15	60201491	60201477	0
Urine EV replicated	tRF-20-40KK5Y93	20	Homo sapiens isolate CHM13 chromosome 15	CP068263	99753195	14	14	28	2	15	25733039	25733052	0
Urine EV replicated	tRF-20-40KK5Y93	20	Homo sapiens isolate CHM13 chromosome 15	CP068263	99753195	14	14	28	6	19	97042857	97042844	0
Urine EV replicated	tRF-20-40KK5Y93	20	Homo sapiens clone FOS_0094, complete sequence	KC951459	42484	15	15	30	6	20	9787	9801	0
Urine EV replicated	tRF-20-40KK5Y93	20	Homo sapiens BAC clone CH17-214K4 from chromosome 14, complete sequence	AC245368	229044	15	15	30	5	19	81566	81580	0
Urine EV replicated	tRF-20-40KK5Y93	20	Homo sapiens DNA, chromosome Y, nearly complete genome	AP023484	50294361	15	15	30	1	15	15747953	15747939	0
Urine EV replicated	tRF-20-40KK5Y93	20	Homo sapiens DNA, chromosome 15, nearly complete genome	AP023475	95537968	15	15	30	5	19	46603806	46603792	0
Urine EV replicated	tRF-20-40KK5Y93	20	Homo sapiens DNA, chromosome 15, nearly complete genome	AP023475	95537968	15	15	30	5	19	50297532	50297546	0
Urine EV replicated	tRF-20-40KK5Y93	20	Homo sapiens DNA, chromosome 15, nearly complete genome	AP023475	95537968	15	15	30	1	15	56108868	56108854	0
Urine EV replicated	tRF-20-40KK5Y93	20	Homo sapiens DNA, chromosome 15, nearly complete genome	AP023475	95537968	14	14	28	2	15	22826772	22826785	0
Urine EV replicated	tRF-20-40KK5Y93	20	Homo sapiens DNA, chromosome 15, nearly complete genome	AP023475	95537968	14	14	28	6	19	92898252	92898239	0
Urine EV replicated	tRF-20-40KK5Y93	20	Homo sapiens chromosome unknown clone VMRC59-165F22, complete sequence	AC279583	103658	18	18	30	1	20	100469	100488	0
Urine EV replicated	tRF-20-40KK5Y93	20	Homo sapiens FOSMID clone ABC10-45505400N1 from chromosome unknown, complete sequence	AC243903	41644	15	15	30	5	19	30300	30286	0
Urine EV replicated	tRF-20-40KK5Y93	20	Homo sapiens NIMA related kinase 1 (NEK1), RefSeqGene on chromosome 4	NG_027982	226358	15	15	30	5	19	187044	187030	0
Urine EV replicated	tRF-20-40KK5Y93	20	Homo sapiens FOSMID clone ABC27-1780C22 from chromosome 14, complete sequence	AC240677	36434	15	15	30	5	19	35444	35430	0
Urine EV replicated	tRF-20-40KK5Y93	20	Homo sapiens mitogen-activated protein kinase 8 interacting protein 1 (MAPK8IP1), RefSeqGene on chromosome 11	NG_012153	27815	15	15	30	4	18	23680	23694	0
Urine EV replicated	tRF-21-86J8WPMNB	21	TPA: Homo sapiens tRNA-Glu-TTC-2-1 gene >gi|634721883|tpe|HG983780.1| TPA: Homo sapiens tRNA-Glu-TTC-2-2 gene >gi|634722948|tpe|HG984353.1| TPA: Mus musculus tRNA-Glu-TTC-1-1 gene >gi|634722950|tpe|HG984354.1| TPA: Mus musculus tRNA-Glu-TTC-1-2 gene >gi|634722953|tpe|HG984355.1| TPA: Mus musculus tRNA-Glu-TTC-1-3 gene >gi|634722955|tpe|HG984356.1| TPA: Mus musculus tRNA-Glu-TTC-1-4 gene >gi|63472…	HG983779	72	21	21	42	1	21	1	21	0
Urine EV replicated	tRF-21-86J8WPMNB	21	Homo sapiens isolate CHM13 chromosome 15	CP068263	99753195	21	21	42	1	21	23822736	23822716	0
Urine EV replicated	tRF-21-86J8WPMNB	21	Homo sapiens isolate CHM13 chromosome 15	CP068263	99753195	15	15	30	4	18	63931937	63931923	0
Urine EV replicated	tRF-21-86J8WPMNB	21	Homo sapiens isolate CHM13 chromosome 15	CP068263	99753195	14	14	28	3	16	18966940	18966953	0
Urine EV replicated	tRF-21-86J8WPMNB	21	Homo sapiens isolate CHM13 chromosome 15	CP068263	99753195	14	14	28	6	19	39897507	39897520	0
Urine EV replicated	tRF-21-86J8WPMNB	21	Homo sapiens DNA, chromosome 15, nearly complete genome	AP023475	95537968	21	21	42	1	21	20916941	20916921	0
Urine EV replicated	tRF-21-86J8WPMNB	21	Homo sapiens DNA, chromosome 15, nearly complete genome	AP023475	95537968	15	15	30	4	18	59833478	59833464	0
Urine EV replicated	tRF-21-86J8WPMNB	21	Homo sapiens DNA, chromosome 15, nearly complete genome	AP023475	95537968	14	14	28	3	16	17367773	17367786	0
Urine EV replicated	tRF-21-86J8WPMNB	21	Homo sapiens DNA, chromosome 15, nearly complete genome	AP023475	95537968	14	14	28	6	19	35809628	35809641	0
Urine EV replicated	tRF-21-86J8WPMNB	21	Homo sapiens chromosome 15, clone RP11-1084I9, complete sequence	AC100836	191525	21	21	42	1	21	68226	68206	0
Urine EV replicated	tRF-21-86J8WPMNB	21	Human DNA sequence from clone RP11-540M5 on chromosome 13, complete sequence	AL354816	159285	21	21	42	1	21	99222	99202	0
Urine EV replicated	tRF-21-86J8WPMNB	21	H.sapiens CpG island DNA genomic Mse1 fragment, clone 121a10, forward read cpg121a10.ft1a	Z59042	291	21	21	42	1	21	136	116	0
Urine EV replicated	tRF-21-86J8WPMNB	21	Homo sapiens LHRI_LNC2020.1 lncRNA gene, complete sequence	MN297206	270	20	20	40	2	21	1	20	0
Urine EV replicated	tRF-21-86J8WPMNB	21	Homo sapiens chromosome 2 clone VMRC59-423C15, complete sequence	AC278289	143255	20	20	37	1	21	5709	5689	0
Urine EV replicated	tRF-21-86J8WPMNB	21	Homo sapiens chromosome 2 clone CH17-116G9, complete sequence	AC277777	207068	20	20	37	1	21	141132	141152	0
Urine EV replicated	tRF-21-86J8WPMNB	21	Homo sapiens coiled-coil domain containing 115 (CCDC115), RefSeqGene on chromosome 2	NG_046779	11878	20	20	37	1	21	10612	10632	0
Urine EV replicated	tRF-21-86J8WPMNB	21	TPA: Homo sapiens tRNA-Glu-TTC-1-2 gene >gi|634721879|tpe|HG983778.1| TPA: Homo sapiens tRNA-Glu-TTC-1-1 gene	HG983777	72	20	20	37	1	21	1	21	0
Urine EV replicated	tRF-21-86J8WPMNB	21	Human DNA sequence from clone RP11-2P5 on chromosome 13, complete sequence	AL157877	198567	20	20	37	1	21	165512	165492	0
Urine EV replicated	tRF-21-86J8WPMNB	21	Homo sapiens BAC clone RP11-769N11 from 2, complete sequence	AC132479	168824	20	20	37	1	21	13195	13175	0
Urine EV replicated	tRF-21-86J8WPMNB	21	Homo sapiens BAC clone RP11-803A13 from 2, complete sequence	AC068137	166719	20	20	37	1	21	79117	79137	0
Urine EV replicated	tRF-21-86J8WPMNB	21	Homo sapiens LHRI_LNC2553.1 lncRNA, complete sequence	MW804030	271	18	18	36	4	21	1	18	0
Urine EV replicated	tRF-21-86J8WPMNB	21	Homo sapiens decapping mRNA 2 (DCP2), RefSeqGene on chromosome 5	NG_029929	52486	17	17	34	1	17	10847	10863	0
Urine EV replicated	tRF-21-86J8WPMNB	21	Homo sapiens chromosome 5 clone CTC-487M23, complete sequence	AC008536	178056	17	17	34	1	17	122863	122879	0
Urine EV replicated	tRF-21-86J8WPMNB	21	Homo sapiens RNA, tRNaseZL-interacting RNA A1	AB330769	32	19	19	32	1	21	1	21	0
Urine EV replicated	tRF-21-86J8WPMNB	21	Homo sapiens chromosome 1 clone RP11-313A24, complete sequence	AC095033	157332	19	19	32	1	21	136971	136951	0
Urine EV replicated	tRF-21-86J8WPMNB	21	Homo sapiens chromosome 1 clone RP11-57H12, complete sequence	AC092802	163331	19	19	32	1	21	52544	52524	0
Urine EV replicated	tRF-21-86J8WPMNB	21	Homo sapiens Rho GTPase activating protein 26 (ARHGAP26), RefSeqGene (LRG_1127) on chromosome 5	NG_016711	465638	15	15	30	2	16	261297	261283	0
Urine EV replicated	tRF-21-86J8WPMNB	21	Homo sapiens Rho guanine nucleotide exchange factor 10 like (ARHGEF10L), RefSeqGene on chromosome 1	NG_050860	191441	15	15	30	2	16	135165	135151	0
Urine EV replicated	tRF-21-86J8WPMNB	21	Homo sapiens isolate CHM13 chromosome 19	CP068259	61707364	15	15	30	2	16	31796151	31796137	0
Urine EV replicated	tRF-21-86J8WPMNB	21	Homo sapiens isolate CHM13 chromosome 19	CP068259	61707364	17	17	28	3	21	2413187	2413205	0
Urine EV replicated	tRF-21-86J8WPMNB	21	Homo sapiens isolate CHM13 chromosome 19	CP068259	61707364	14	14	28	6	19	8270476	8270489	0
Urine EV replicated	tRF-21-86J8WPMNB	21	Homo sapiens isolate CHM13 chromosome 19	CP068259	61707364	14	14	28	6	19	9331891	9331904	0
Urine EV replicated	tRF-21-86J8WPMNB	21	Homo sapiens isolate CHM13 chromosome 19	CP068259	61707364	14	14	28	6	19	9902268	9902281	0
Urine EV replicated	tRF-21-86J8WPMNB	21	Homo sapiens isolate CHM13 chromosome 19	CP068259	61707364	14	14	28	6	19	20097061	20097048	0
Urine EV replicated	tRF-21-86J8WPMNB	21	Homo sapiens isolate CHM13 chromosome 19	CP068259	61707364	14	14	28	6	19	34895890	34895877	0
Urine EV replicated	tRF-21-86J8WPMNB	21	Homo sapiens isolate CHM13 chromosome 19	CP068259	61707364	14	14	28	6	19	51871715	51871702	0
Urine EV replicated	tRF-21-86J8WPMNB	21	Homo sapiens DNA, chromosome 19, nearly complete genome	AP023479	59105444	15	15	30	2	16	29407903	29407889	0
Urine EV replicated	tRF-21-86J8WPMNB	21	Homo sapiens DNA, chromosome 19, nearly complete genome	AP023479	59105444	17	17	28	3	21	2296424	2296442	0
Urine EV replicated	tRF-21-86J8WPMNB	21	Homo sapiens DNA, chromosome 19, nearly complete genome	AP023479	59105444	14	14	28	6	19	8175834	8175847	0
Urine EV replicated	tRF-21-86J8WPMNB	21	Homo sapiens DNA, chromosome 19, nearly complete genome	AP023479	59105444	14	14	28	6	19	9091877	9091890	0
Urine EV replicated	tRF-21-86J8WPMNB	21	Homo sapiens DNA, chromosome 19, nearly complete genome	AP023479	59105444	14	14	28	6	19	9662158	9662171	0
Urine EV replicated	tRF-21-86J8WPMNB	21	Homo sapiens DNA, chromosome 19, nearly complete genome	AP023479	59105444	14	14	28	6	19	19853119	19853106	0
Urine EV replicated	tRF-21-86J8WPMNB	21	Homo sapiens DNA, chromosome 19, nearly complete genome	AP023479	59105444	14	14	28	6	19	32512953	32512940	0
Urine EV replicated	tRF-21-86J8WPMNB	21	Homo sapiens DNA, chromosome 19, nearly complete genome	AP023479	59105444	14	14	28	6	19	49162429	49162416	0
Urine EV replicated	tRF-21-86J8WPMNB	21	Homo sapiens FOSMID clone WI2-3254A1 from chromosome 11, complete sequence	AC241813	40890	15	15	30	5	19	14156	14142	0
Urine EV replicated	tRF-21-86J8WPMNB	21	Homo sapiens FOSMID clone ABC27-1086A7 from chromosome 11, complete sequence	AC240501	39870	15	15	30	5	19	18185	18199	0
[truncated: 1,326 more rows]
